# Supplementary material for: An integrative machine learning strategy for improved prediction of essential genes in Escherichia coli metabolism using flux-coupled features
Source: Royal Society of Chemistry journal article supplement (doi:10.1039/c7mb00234c), 2017-06-14
Supplement: c7mb00234c1.zip [file c7mb00234c1.zip]

## Sheet: Supporting Material S1
Gene-reaction Pair	PR	aveEXP	mEF	NGSE	A3	T3	G3	C3	GC1	GC2	GC3	CDSlen	Num_codon	Alaf	Cysf	Aspf	Gluf	Phef	Glyf	Hisf	Ilef	Lysf	Leuf	Metf	Asnf	Prof	Glnf	Argf	Serf	Thrf	Valf	Trpf	Tyrf	ENC	CAI	H3	H5	H7	H10	H20	H30	PL	FCA_DC	FCA_EC	FCA_CC	FCA_BC	FCA_AS	FCA_HS	FCA_M
S4FE4ST_b1683	455	0.107933	1.12275	2	84	118	139	155	0.53629	0.417339	0.592742	1488	496	46	13	22	42	22	36	12	28	24	31	9	27	16	18	19	38	32	33	7	20	46.537	0.639	0	0	0	0	0	0	495	272	9	0.398115	0.000782	0.00291362	0.00291362	91
2AGPG161tipp_b2835	60	0.122308	0.614945	0	50	93	149	106	0.580402	0.444724	0.640704	1194	398	57	4	4	9	20	43	4	26	12	57	14	16	14	10	10	22	18	38	9	10	50.482	0.583	0	0	0	0	0	0	397	4	10	0.182809	1.74e-05	5.34e-05	5.34e-05	198
GDPtex_b2215	64	0.0280042	1.90111	9	51	107	58	152	0.570652	0.377717	0.570652	1104	368	29	0	32	11	19	48	1	10	17	27	4	32	4	21	13	17	24	25	4	29	29.032	0.898	3	3	3	3	3	3	367	0	0	0	0	0	0	0
TTRCYCtpp_b0463	141	0.0342673	0.499558	0	78	103	112	105	0.640704	0.429648	0.545226	1194	398	47	1	22	17	7	32	1	20	23	34	4	17	18	36	17	22	33	36	1	9	46.088	0.66	1	1	1	1	1	1	397	1	1	1	0	2.13e-05	2.13e-05	326
FECRMtonex_b3006	291	0.0244404	0.964254	0	41	65	67	72	0.616327	0.408163	0.567347	735	245	33	1	9	12	11	21	3	16	8	28	6	12	4	14	14	15	9	22	3	3	44.038	0.658	0	0	0	0	0	0	244	8	11	0.315072	3.39e-07	9.61e-05	9.61e-05	261
MAN6PI_b1613	159	0.0419388	1.0544	0	81	99	115	97	0.596939	0.385204	0.540816	1176	392	45	2	16	29	20	21	9	17	22	47	9	19	26	22	11	30	12	23	4	7	41.604	0.639	0	0	0	0	0	0	391	0	0	0	0	0	0	0
FRULYStex_b1377	49	0.0274733	0.683685	1	68	140	60	110	0.550265	0.399471	0.449735	1134	378	42	0	37	12	19	43	5	9	17	27	9	33	5	14	11	21	24	17	5	27	40.354	0.74	3	3	3	3	3	3	377	0	0	0	0	0	0	0
FHL_b2484	36	0.314271	0.970444	4	56	99	178	147	0.55	0.433333	0.677083	1440	480	57	4	10	10	32	41	8	31	10	78	16	8	20	12	16	35	25	39	10	17	43.926	0.57	0	0	0	0	0	0	479	6	12	0.241284	0.00743898	7.47e-05	7.47e-05	261
URAtex_b2215	64	0.0280042	1.90111	9	51	107	58	152	0.570652	0.377717	0.570652	1104	368	29	0	32	11	19	48	1	10	17	27	4	32	4	21	13	17	24	25	4	29	29.032	0.898	3	3	3	3	3	3	367	2	2	0.75	0	3.2e-05	3.2e-05	1
RNTR2c2_b2895	87	0.0369536	0.914535	0	29	38	50	57	0.597701	0.327586	0.614943	522	174	9	2	16	16	6	16	3	10	8	22	6	5	6	8	2	7	8	8	6	9	43.106	0.664	1	1	1	1	1	1	173	1	10	0.295894	0	2.13e-05	2.13e-05	302
TTDCAtexi_b2344	76	0.186239	1.56634	0	71	150	93	133	0.519016	0.469799	0.505593	1341	447	50	0	25	13	25	45	5	21	14	31	7	33	16	22	15	39	32	18	12	23	45.305	0.702	0	0	0	0	0	0	446	0	0	0	0	0	0	0
LPLIPAL1G140pp_b0494	210	0.032285	0.623363	0	31	51	67	60	0.593301	0.382775	0.607656	627	209	22	0	12	7	11	10	4	7	8	29	7	11	14	17	11	11	6	10	6	5	46.887	0.587	0	0	0	0	0	0	208	2	12	0.138277	0	3.2e-05	3.2e-05	197
FUSAtex_b0241	57	0.045701	0.726706	0	70	118	72	92	0.502841	0.372159	0.465909	1056	352	31	0	31	14	21	37	1	14	25	23	9	27	3	17	12	21	24	16	3	22	46.295	0.669	3	3	3	3	3	3	351	1	1	1	0	2.13e-05	2.13e-05	125
FEENTERtex_b3035	76	0.232213	0.78678	0	80	129	139	146	0.554656	0.408907	0.576923	1482	494	57	0	25	20	10	24	3	21	18	53	6	43	17	44	22	44	36	28	1	21	45.516	0.658	0	0	0	0	0	0	493	6	12	0.241379	1.63e-06	7.47e-05	7.47e-05	261
CYANtex_b1377	49	0.0274733	0.683685	1	68	140	60	110	0.550265	0.399471	0.449735	1134	378	42	0	37	12	19	43	5	9	17	27	9	33	5	14	11	21	24	17	5	27	40.354	0.74	3	3	3	3	3	3	377	0	0	0	0	0	0	0
ENTERES_b0585	79	0.493133	0.893532	2	87	90	121	103	0.625935	0.46384	0.558603	1203	401	32	5	19	26	12	30	12	19	13	40	7	8	27	28	26	25	17	24	23	7	56.524	0.532	0	0	0	0	0	0	400	1	12	0.208724	0	2.13e-05	2.13e-05	306
S2FE2SR_b1679	150	0.381418	0.852153	0	28	39	39	33	0.582734	0.359712	0.517986	417	139	13	2	8	9	4	6	1	12	6	16	5	5	6	12	10	7	3	7	3	3	48.052	0.579	0	0	0	0	0	0	138	359	9	0.420096	0.0336325	0.00384213	0.00384213	302
GLUSy_b3212	462	0.74213	1.73775	7	203	309	417	558	0.627438	0.423672	0.655683	4461	1487	142	20	90	89	55	134	34	81	68	148	32	58	69	54	95	80	76	98	14	49	40.773	0.706	0	0	0	0	0	0	1486	1	11	0.250511	0	2.13e-05	2.13e-05	91
NAtex_b2215	64	0.0280042	1.90111	9	51	107	58	152	0.570652	0.377717	0.570652	1104	368	29	0	32	11	19	48	1	10	17	27	4	32	4	21	13	17	24	25	4	29	29.032	0.898	3	3	3	3	3	3	367	0	0	0	0	0	0	0
ANPRT_b1263	466	0.534255	1.59865	4	86	123	166	157	0.656015	0.428571	0.607143	1596	532	66	5	21	29	15	46	22	27	14	66	13	23	29	27	25	31	25	33	1	13	42.087	0.632	1	1	1	1	1	1	531	163	10	0.374962	5.31e-05	0.0017503	0.0017503	91
CRNtex_b0241	57	0.045701	0.726706	0	70	118	72	92	0.502841	0.372159	0.465909	1056	352	31	0	31	14	21	37	1	14	25	23	9	27	3	17	12	21	24	16	3	22	46.295	0.669	3	3	3	3	3	3	351	0	0	0	0	0	0	0
UPLA4FNF_b2256	102	0.0421586	1.00727	3	59	86	71	81	0.619529	0.454545	0.511785	891	297	28	5	16	18	9	28	11	19	11	29	5	11	13	12	23	12	14	17	11	4	49.676	0.601	0	0	0	0	0	0	296	64	11	0.334334	0.000232	0.000694	0.000694	306
14GLUCANabcpp_b4035	138	0.557362	0.951593	0	68	82	118	104	0.682796	0.365591	0.596774	1116	372	28	3	17	26	11	28	10	21	15	40	11	13	20	22	24	17	14	43	2	6	47.748	0.646	12	12	12	12	12	12	371	0	0	0	0	0	0	0
12PPDStex_b1377	49	0.0274733	0.683685	1	68	140	60	110	0.550265	0.399471	0.449735	1134	378	42	0	37	12	19	43	5	9	17	27	9	33	5	14	11	21	24	17	5	27	40.354	0.74	3	3	3	3	3	3	377	5	11	0.315153	0.000206	6.4e-05	6.4e-05	261
NTP12_b4394	97	0.355202	1.0235	0	22	53	49	47	0.649123	0.473684	0.561404	513	171	24	2	4	15	7	15	5	12	4	10	2	5	8	6	11	11	8	16	2	3	50.434	0.611	0	0	0	0	0	0	170	0	0	0	0	0	0	0
IGPDH_b2022	579	0.690608	1.00248	0	53	84	96	123	0.623596	0.36236	0.615169	1068	356	19	6	30	22	18	30	12	20	19	36	12	9	13	17	24	14	21	21	2	10	39.483	0.697	0	0	0	0	0	0	355	168	10	0.375536	2.39e-05	0.00180367	0.00180367	91
PGPP140pp_b1278	82	0.0324914	0.618938	0	72	65	75	43	0.588235	0.466667	0.462745	765	255	29	2	3	15	11	15	6	16	10	32	5	3	13	11	18	10	15	21	17	2	55.788	0.485	0	0	0	0	0	0	254	2	15	0.0978904	0	3.2e-05	3.2e-05	197
ARBTtex_b1377	49	0.0274733	0.683685	1	68	140	60	110	0.550265	0.399471	0.449735	1134	378	42	0	37	12	19	43	5	9	17	27	9	33	5	14	11	21	24	17	5	27	40.354	0.74	3	3	3	3	3	3	377	0	0	0	0	0	0	0
DURItex_b0411	49	0.0397702	1.70132	0	35	76	63	121	0.491525	0.4	0.623729	885	295	20	0	23	9	19	31	7	13	13	19	6	26	8	8	9	21	14	13	14	21	35.71	0.816	0	0	0	0	0	0	294	0	0	0	0	0	0	0
SBTptspp_b2703	83	0.132887	1.02511	1	53	83	84	100	0.60625	0.459375	0.575	960	320	31	4	13	11	11	39	5	32	13	32	6	4	21	11	10	18	20	28	4	6	51.121	0.621	0	0	0	0	0	0	319	0	0	0	0	0	0	0
OCTAtex_b1377	49	0.0274733	0.683685	1	68	140	60	110	0.550265	0.399471	0.449735	1134	378	42	0	37	12	19	43	5	9	17	27	9	33	5	14	11	21	24	17	5	27	40.354	0.74	3	3	3	3	3	3	377	0	0	0	0	0	0	0
ASPO4_b2574	445	0.356383	0.852915	0	86	160	142	153	0.628466	0.421442	0.545287	1623	541	47	9	33	36	15	41	26	32	12	52	13	21	23	15	41	29	30	40	8	17	49.033	0.577	0	0	0	0	0	0	540	268	9	0.397598	0.000782	0.00287093	0.00287093	91
RHAT1_b3629	22	0.0915891	0.445513	0	107	134	40	31	0.333333	0.24359	0.227564	936	312	7	3	24	16	19	12	4	43	35	25	7	29	5	7	11	19	14	11	5	15	40.702	0.424	0	0	0	0	0	0	311	84	10	0.320597	0.000154	0.000907	0.000907	306
LALALGLUtex_b1377	49	0.0274733	0.683685	1	68	140	60	110	0.550265	0.399471	0.449735	1134	378	42	0	37	12	19	43	5	9	17	27	9	33	5	14	11	21	24	17	5	27	40.354	0.74	3	3	3	3	3	3	377	0	0	0	0	0	0	0
SERASr_b0586	67	0.520163	0.878174	0	231	321	448	294	0.670015	0.452859	0.573416	3882	1294	160	13	74	73	46	84	27	53	25	160	27	28	92	83	76	62	75	78	24	33	45.473	0.599	0	0	0	0	0	0	1293	33	10	0.30997	0.000344	0.000363	0.000363	306
ACACCT_b2222	252	0.0260336	0.771306	2	43	60	55	59	0.640553	0.442396	0.525346	651	217	26	5	14	10	6	24	6	12	7	22	11	7	9	7	12	5	12	18	2	1	47.054	0.572	0	0	0	0	0	0	216	0	0	0	0	0	0	0
ISETACtex_b0241	57	0.045701	0.726706	0	70	118	72	92	0.502841	0.372159	0.465909	1056	352	31	0	31	14	21	37	1	14	25	23	9	27	3	17	12	21	24	16	3	22	46.295	0.669	3	3	3	3	3	3	351	0	0	0	0	0	0	0
SLNTtex_b2215	64	0.0280042	1.90111	9	51	107	58	152	0.570652	0.377717	0.570652	1104	368	29	0	32	11	19	48	1	10	17	27	4	32	4	21	13	17	24	25	4	29	29.032	0.898	3	3	3	3	3	3	367	0	0	0	0	0	0	0
NO2tex_b0929	44	1.53858	2.15677	0	56	129	52	126	0.556474	0.385675	0.490358	1089	363	34	0	27	14	19	49	1	14	19	23	5	32	5	13	12	16	22	26	2	29	37.082	0.832	3	3	3	3	3	3	362	0	0	0	0	0	0	0
DHAPT_b2415	225	0.0245069	1.24341	4	18	22	22	24	0.593023	0.395349	0.534884	258	86	9	0	1	9	4	6	2	3	7	8	2	2	2	6	1	6	10	7	0	0	38.988	0.805	1	1	1	0	0	0	85	1	10	0.295894	0	2.13e-05	2.13e-05	302
PYRtex_b0929	44	1.53858	2.15677	0	56	129	52	126	0.556474	0.385675	0.490358	1089	363	34	0	27	14	19	49	1	14	19	23	5	32	5	13	12	16	22	26	2	29	37.082	0.832	3	3	3	3	3	3	362	4	10	0.353637	0	5.34e-05	5.34e-05	261
MDDCP5pp_b0632	85	0.183378	1.02434	1	65	114	96	129	0.542079	0.381188	0.556931	1212	404	35	2	25	16	21	35	7	25	26	37	15	23	13	17	17	25	22	26	5	11	41.575	0.727	2	2	2	2	2	2	403	2	12	0.203117	3.75e-07	3.2e-05	3.2e-05	306
POR5_b1378	198	0.281107	0.700258	0	219	315	325	316	0.620426	0.431489	0.545532	3525	1175	133	19	62	76	39	78	27	56	48	117	25	46	67	56	62	71	63	78	14	37	45.162	0.648	0	0	0	0	0	0	1174	0	0	0	0	0	0	277
CPMPS_b0783	539	0.133975	0.589818	0	27	33	55	47	0.623457	0.425926	0.62963	486	162	23	3	9	12	3	10	6	9	10	13	8	3	4	4	10	7	11	14	1	1	41.684	0.667	0	0	0	0	0	0	161	336	9	0.424022	0.000798	0.00359666	0.00359666	91
DMSOR1_b1590	52	0.101836	0.738668	0	53	75	78	79	0.578947	0.449123	0.550877	855	285	31	6	4	4	15	32	6	24	3	42	11	7	9	8	12	16	11	28	11	4	50.288	0.531	1	1	1	1	1	1	284	0	0	0	0	0	0	0
PGPP160pp_b1278	82	0.0324914	0.618938	0	72	65	75	43	0.588235	0.466667	0.462745	765	255	29	2	3	15	11	15	6	16	10	32	5	3	13	11	18	10	15	21	17	2	55.788	0.485	0	0	0	0	0	0	254	2	11	0.238188	0	3.2e-05	3.2e-05	306
LEUabcpp_b3460	71	1.56055	1.99746	12	66	72	122	108	0.611413	0.396739	0.625	1104	368	49	3	26	17	11	36	4	22	31	27	7	16	15	20	7	15	18	27	3	13	37.233	0.73	1	1	1	1	1	1	367	1	13	0.193553	0	2.13e-05	2.13e-05	261
LIPOtex_b0929	44	1.53858	2.15677	0	56	129	52	126	0.556474	0.385675	0.490358	1089	363	34	0	27	14	19	49	1	14	19	23	5	32	5	13	12	16	22	26	2	29	37.082	0.832	3	3	3	3	3	3	362	0	0	0	0	0	0	0
ACGALtex_b1377	49	0.0274733	0.683685	1	68	140	60	110	0.550265	0.399471	0.449735	1134	378	42	0	37	12	19	43	5	9	17	27	9	33	5	14	11	21	24	17	5	27	40.354	0.74	3	3	3	3	3	3	377	0	0	0	0	0	0	0
PUNP1_b4384	173	0.156214	1.07229	0	38	61	46	95	0.591667	0.391667	0.5875	720	240	26	4	19	14	12	23	6	18	14	15	12	7	6	2	12	9	14	20	0	6	35.287	0.824	0	0	0	0	0	0	239	0	0	0	0	0	0	287
LPLIPAL1A181pp_b0494	210	0.032285	0.623363	0	31	51	67	60	0.593301	0.382775	0.607656	627	209	22	0	12	7	11	10	4	7	8	29	7	11	14	17	11	11	6	10	6	5	46.887	0.587	0	0	0	0	0	0	208	2	10	0.174576	0	3.2e-05	3.2e-05	198
ALAtex_b0241	57	0.045701	0.726706	0	70	118	72	92	0.502841	0.372159	0.465909	1056	352	31	0	31	14	21	37	1	14	25	23	9	27	3	17	12	21	24	16	3	22	46.295	0.669	3	3	3	3	3	3	351	2	11	0.314587	0	3.2e-05	3.2e-05	261
ASNS1_b0674	89	0.00804222	1.29507	0	98	138	158	161	0.609009	0.38018	0.574775	1665	555	54	8	38	41	21	36	19	27	33	47	16	13	22	23	28	37	17	36	9	29	42.479	0.721	0	0	0	0	0	0	554	1	11	0.250511	0	2.13e-05	2.13e-05	91
3GMPtex_b0929	44	1.53858	2.15677	0	56	129	52	126	0.556474	0.385675	0.490358	1089	363	34	0	27	14	19	49	1	14	19	23	5	32	5	13	12	16	22	26	2	29	37.082	0.832	3	3	3	3	3	3	362	0	0	0	0	0	0	0
NTPP4_b2781	458	0.271171	0.613909	0	54	74	75	61	0.662879	0.344697	0.515152	792	264	27	3	21	32	11	10	4	13	12	24	8	7	7	17	21	7	12	18	4	5	43.609	0.653	0	0	0	0	0	0	263	0	0	0	0	0	0	256
23DAPPAtex_b0241	57	0.045701	0.726706	0	70	118	72	92	0.502841	0.372159	0.465909	1056	352	31	0	31	14	21	37	1	14	25	23	9	27	3	17	12	21	24	16	3	22	46.295	0.669	3	3	3	3	3	3	351	0	0	0	0	0	0	0
2AGPEAT181_b2836	53	0.183582	0.630585	1	136	179	211	194	0.611111	0.405556	0.5625	2160	720	55	4	30	45	36	55	16	39	38	78	23	13	41	27	51	33	44	61	8	22	47.712	0.603	0	0	0	0	0	0	719	4	9	0.250255	0.001448	5.34e-05	5.34e-05	198
DMSOR1pp_b1873	40	0.195518	0.837065	0	88	109	85	85	0.544959	0.414169	0.463215	1101	367	42	10	24	23	11	25	15	18	27	30	10	11	11	20	10	26	22	14	5	12	56.355	0.572	1	1	1	1	1	1	366	0	0	0	0	0	0	0
FE3DHBZStonex_b0805	38	0.204589	1.04557	0	90	210	168	293	0.536137	0.473062	0.605782	2283	761	67	3	52	24	26	76	16	39	27	40	11	57	31	31	34	56	83	45	9	33	46.474	0.638	0	0	0	0	0	0	760	0	0	0	0	0	0	0
DGMPtex_b1377	49	0.0274733	0.683685	1	68	140	60	110	0.550265	0.399471	0.449735	1134	378	42	0	37	12	19	43	5	9	17	27	9	33	5	14	11	21	24	17	5	27	40.354	0.74	3	3	3	3	3	3	377	0	0	0	0	0	0	0
SUCMALtpp_b4123	82	0.0966133	0.659513	0	58	116	141	132	0.561521	0.395973	0.610738	1341	447	48	5	15	12	23	38	6	50	16	53	16	10	22	10	12	27	19	43	6	15	42.419	0.685	1	1	1	1	1	1	446	1	13	0.193615	0	2.13e-05	2.13e-05	261
PRASCSi_b2476	308	0.222862	1.59201	3	39	49	78	72	0.613445	0.323529	0.630252	714	238	15	3	19	22	12	17	1	7	20	30	9	11	7	6	14	10	8	17	2	7	38.5	0.756	0	0	0	0	0	0	237	169	10	0.334791	0.000194	0.00181434	0.00181434	91
GALS3_b4119	96	0.0126286	0.858157	5	63	122	143	124	0.588496	0.393805	0.590708	1356	452	43	12	25	33	11	28	17	32	20	39	16	19	23	14	22	14	29	28	7	19	46.675	0.635	0	0	0	0	0	0	451	0	0	0	0	0	0	0
COBALT2tex_b0241	57	0.045701	0.726706	0	70	118	72	92	0.502841	0.372159	0.465909	1056	352	31	0	31	14	21	37	1	14	25	23	9	27	3	17	12	21	24	16	3	22	46.295	0.669	3	3	3	3	3	3	351	336	9	0.424022	0.000798	0.00359666	0.00359666	91
MANtex_b2215	64	0.0280042	1.90111	9	51	107	58	152	0.570652	0.377717	0.570652	1104	368	29	0	32	11	19	48	1	10	17	27	4	32	4	21	13	17	24	25	4	29	29.032	0.898	3	3	3	3	3	3	367	0	0	0	0	0	0	0
SUCCtex_b2215	64	0.0280042	1.90111	9	51	107	58	152	0.570652	0.377717	0.570652	1104	368	29	0	32	11	19	48	1	10	17	27	4	32	4	21	13	17	24	25	4	29	29.032	0.898	3	3	3	3	3	3	367	2	11	0.314587	0	3.2e-05	3.2e-05	261
PROD2_b1014	201	0.156978	0.767942	0	204	316	449	352	0.662377	0.440575	0.606359	3963	1321	166	13	59	90	29	97	24	69	40	156	27	49	71	73	87	70	66	83	12	39	43.613	0.647	0	0	0	0	0	0	1320	0	0	0	0	0	0	285
NADH18pp_b2283	73	0.223309	1.07442	0	127	221	263	298	0.639164	0.435644	0.617162	2727	909	97	16	55	57	32	75	26	45	31	69	22	38	41	44	63	48	43	65	12	29	38.287	0.75	0	0	0	0	0	0	908	1	15	0.140369	0	2.13e-05	2.13e-05	261
LALGP_b0237	140	0.214823	0.934928	2	84	131	134	137	0.613169	0.37037	0.557613	1458	486	42	4	29	36	13	42	16	31	29	54	11	26	23	14	15	22	26	36	6	10	39.382	0.756	0	0	0	0	0	0	485	2	1	1	0	3.2e-05	3.2e-05	192
INDOLEt2pp_b3265	73	0.0657228	0.814442	13	75	109	86	116	0.611399	0.427461	0.523316	1158	386	44	1	20	22	8	26	6	23	21	28	4	14	19	27	17	25	32	37	1	10	49.553	0.606	1	1	1	1	1	1	385	0	0	0	0	0	0	186
TMAOR1pp_b0996	50	0.057848	0.986879	6	70	101	105	115	0.554987	0.419437	0.56266	1173	391	40	10	25	24	10	24	14	25	31	24	11	15	14	18	20	26	21	20	9	9	48.246	0.668	2	2	2	2	2	2	390	0	0	0	0	0	0	0
UDPGALtex_b0241	57	0.045701	0.726706	0	70	118	72	92	0.502841	0.372159	0.465909	1056	352	31	0	31	14	21	37	1	14	25	23	9	27	3	17	12	21	24	16	3	22	46.295	0.669	3	3	3	3	3	3	351	0	0	0	0	0	0	0
THMDtex_b2215	64	0.0280042	1.90111	9	51	107	58	152	0.570652	0.377717	0.570652	1104	368	29	0	32	11	19	48	1	10	17	27	4	32	4	21	13	17	24	25	4	29	29.032	0.898	3	3	3	3	3	3	367	3	11	0.31491	0.000829	4.27e-05	4.27e-05	261
METSOXR1_b3781	625	0.0391972	0.941381	0	20	26	31	33	0.581818	0.363636	0.581818	330	110	12	2	11	5	4	9	1	9	10	13	2	4	5	3	1	3	6	5	2	2	38.428	0.781	1	1	1	1	1	0	109	6	11	0.316292	6.65e-05	7.47e-05	7.47e-05	261
FDH5pp_b3892	80	0.407626	1.03147	0	25	43	72	72	0.504717	0.391509	0.679245	636	212	21	2	4	7	18	10	8	22	10	15	8	7	8	3	14	7	10	21	10	6	45.249	0.662	1	1	1	1	1	1	211	1	11	0.228715	0	2.13e-05	2.13e-05	302
HISabcpp_b2306	76	0.0725659	0.641647	0	58	49	91	60	0.631783	0.341085	0.585271	774	258	15	1	8	22	9	21	9	13	16	30	8	10	9	17	15	17	9	24	1	3	48.831	0.57	7	7	7	7	6	5	257	1	13	0.19337	0	2.13e-05	2.13e-05	261
LEUabcpp_b3454	391	0.832839	1.03879	3	27	48	95	68	0.634454	0.382353	0.684874	714	238	21	1	12	18	9	22	5	17	8	27	9	8	6	14	17	10	12	15	2	4	43.799	0.608	0	0	0	0	0	0	237	1	13	0.193553	0	2.13e-05	2.13e-05	261
PPTtex_b0929	44	1.53858	2.15677	0	56	129	52	126	0.556474	0.385675	0.490358	1089	363	34	0	27	14	19	49	1	14	19	23	5	32	5	13	12	16	22	26	2	29	37.082	0.832	3	3	3	3	3	3	362	0	0	0	0	0	0	0
GBBTNtex_b1377	49	0.0274733	0.683685	1	68	140	60	110	0.550265	0.399471	0.449735	1134	378	42	0	37	12	19	43	5	9	17	27	9	33	5	14	11	21	24	17	5	27	40.354	0.74	3	3	3	3	3	3	377	0	0	0	0	0	0	0
PHEMEabcpp_b2199	216	0.0679466	0.656334	0	33	57	103	53	0.565041	0.45935	0.634146	738	246	27	1	5	4	10	18	5	21	6	31	12	5	11	8	15	13	10	19	17	7	42.428	0.638	0	0	0	0	0	0	245	18	11	0.317029	1.02e-05	0.000203	0.000203	261
G3PSabcpp_b3451	113	0.301202	1.14633	2	26	48	113	95	0.510638	0.382979	0.737589	846	282	25	1	8	9	23	14	3	25	5	37	16	11	15	5	10	12	23	26	8	5	41.782	0.626	2	0	0	0	0	0	281	0	0	0	0	0	0	0
SULFACtex_b2215	64	0.0280042	1.90111	9	51	107	58	152	0.570652	0.377717	0.570652	1104	368	29	0	32	11	19	48	1	10	17	27	4	32	4	21	13	17	24	25	4	29	29.032	0.898	3	3	3	3	3	3	367	0	0	0	0	0	0	0
IPPMIa_b0072	462	0.857005	1.29115	5	89	95	119	164	0.620985	0.445396	0.605996	1401	467	55	9	23	32	16	47	14	26	25	30	15	17	23	17	21	17	33	35	3	8	38.143	0.737	0	0	0	0	0	0	466	164	10	0.374618	0.000251	0.00176098	0.00176098	91
2AGPA160tipp_b2835	60	0.122308	0.614945	0	50	93	149	106	0.580402	0.444724	0.640704	1194	398	57	4	4	9	20	43	4	26	12	57	14	16	14	10	10	22	18	38	9	10	50.482	0.583	0	0	0	0	0	0	397	3	10	0.179962	0	4.27e-05	4.27e-05	198
ARBTptspp_b3722	96	0.198021	0.783386	0	110	167	179	170	0.549521	0.428115	0.557508	1878	626	63	8	24	21	39	63	10	58	22	68	15	17	34	19	15	35	41	53	9	11	52.908	0.559	4	3	3	2	2	0	625	0	0	0	0	0	0	0
FEOXAMabcpp_b0152	51	0.00137629	0.771041	0	51	67	100	79	0.59596	0.441077	0.602694	891	297	32	1	17	13	13	18	5	13	8	39	14	11	22	8	19	17	13	18	8	7	45.741	0.583	0	0	0	0	0	0	296	8	11	0.315072	3.39e-07	9.61e-05	9.61e-05	261
AACPS3_b2836	53	0.183582	0.630585	1	136	179	211	194	0.611111	0.405556	0.5625	2160	720	55	4	30	45	36	55	16	39	38	78	23	13	41	27	51	33	44	61	8	22	47.712	0.603	0	0	0	0	0	0	719	2	10	0.311546	1.05e-06	3.2e-05	3.2e-05	302
SELtex_b1377	49	0.0274733	0.683685	1	68	140	60	110	0.550265	0.399471	0.449735	1134	378	42	0	37	12	19	43	5	9	17	27	9	33	5	14	11	21	24	17	5	27	40.354	0.74	3	3	3	3	3	3	377	0	0	0	0	0	0	0
PLIPA1E120pp_b3821	101	0.0282509	0.656571	0	38	73	92	87	0.524138	0.396552	0.617241	870	290	18	0	16	15	10	23	5	9	10	29	8	20	13	12	13	19	18	18	10	23	46.721	0.641	0	0	0	0	0	0	289	5	11	0.159797	0.000208	6.4e-05	6.4e-05	198
AGM4Pt2pp_b0433	80	0.0755576	0.608944	0	85	121	154	132	0.585366	0.443089	0.581301	1476	492	60	5	15	11	30	45	4	24	10	89	15	9	17	14	19	27	30	37	15	15	54.208	0.534	0	0	0	0	0	0	491	5	3	0.538462	1.16e-05	6.4e-05	6.4e-05	32
AMPTASEPG_b4260	396	0.0252466	0.778094	0	77	118	162	147	0.619048	0.426587	0.613095	1512	504	48	9	19	38	12	49	10	27	24	50	16	23	20	21	32	29	24	34	4	14	43.386	0.665	1	1	1	1	1	1	503	0	0	0	0	0	0	0
PNTOtex_b1377	49	0.0274733	0.683685	1	68	140	60	110	0.550265	0.399471	0.449735	1134	378	42	0	37	12	19	43	5	9	17	27	9	33	5	14	11	21	24	17	5	27	40.354	0.74	3	3	3	3	3	3	377	0	0	0	0	0	0	0
HXAtex_b0241	57	0.045701	0.726706	0	70	118	72	92	0.502841	0.372159	0.465909	1056	352	31	0	31	14	21	37	1	14	25	23	9	27	3	17	12	21	24	16	3	22	46.295	0.669	3	3	3	3	3	3	351	3	11	0.315234	0.00165627	4.27e-05	4.27e-05	261
F6Pt6_2pp_b3666	45	0.0629608	0.703357	0	55	104	142	163	0.523707	0.405172	0.657328	1392	464	44	6	13	17	35	52	3	39	23	56	16	12	10	14	14	29	24	28	9	19	41.785	0.7	0	0	0	0	0	0	463	0	0	0	0	0	0	0
ASPt2_3pp_b4138	114	0.173468	0.969618	0	56	112	121	145	0.559908	0.40553	0.612903	1302	434	47	5	11	12	22	35	5	43	16	56	15	13	19	8	8	30	28	47	4	9	37.626	0.749	1	1	1	1	1	1	433	0	0	0	0	0	0	53
SO4tex_b0241	57	0.045701	0.726706	0	70	118	72	92	0.502841	0.372159	0.465909	1056	352	31	0	31	14	21	37	1	14	25	23	9	27	3	17	12	21	24	16	3	22	46.295	0.669	3	3	3	3	3	3	351	165	10	0.374732	0.000184	0.00177165	0.00177165	91
PPK2r_b2501	249	0.130215	0.561956	0	107	187	185	210	0.56894	0.323657	0.573295	2067	689	42	2	45	45	30	26	16	53	37	79	15	41	28	23	61	39	20	46	5	35	46.27	0.627	0	0	0	0	0	0	688	0	0	0	0	0	0	281
FRUptspp_b2416	315	0.342568	1.34241	0	114	167	148	147	0.619792	0.357639	0.512153	1728	576	63	4	39	60	18	36	8	51	35	58	18	17	15	21	31	26	29	35	2	9	43.52	0.718	0	0	0	0	0	0	575	0	0	0	0	0	0	0
ME1_b1479	119	0.045216	1.01047	0	101	126	164	175	0.584806	0.376325	0.59894	1698	566	41	6	31	37	22	41	6	43	24	52	17	30	29	32	31	29	29	40	7	18	43.098	0.677	0	0	0	0	0	0	565	0	0	0	0	0	0	203
ACALD_b1241	167	0.422618	1.85799	2	167	275	199	251	0.600897	0.413677	0.504484	2676	892	121	9	50	54	31	62	20	60	65	72	21	34	41	24	32	50	49	63	5	28	34.816	0.816	0	0	0	0	0	0	891	0	0	0	0	0	0	14
PLIPA2E140pp_b3821	101	0.0282509	0.656571	0	38	73	92	87	0.524138	0.396552	0.617241	870	290	18	0	16	15	10	23	5	9	10	29	8	20	13	12	13	19	18	18	10	23	46.721	0.641	0	0	0	0	0	0	289	3	12	0.138481	1.07e-05	4.27e-05	4.27e-05	197
GLNabcpp_b0809	374	0.0497071	0.941355	0	38	50	88	65	0.655602	0.327801	0.634855	723	241	18	1	10	22	10	17	8	16	15	27	7	9	12	13	13	11	7	22	0	2	38.073	0.71	16	16	16	16	16	14	240	0	0	0	0	0	0	0
ASPt2_3pp_b4123	82	0.0966133	0.659513	0	58	116	141	132	0.561521	0.395973	0.610738	1341	447	48	5	15	12	23	38	6	50	16	53	16	10	22	10	12	27	19	43	6	15	42.419	0.685	1	1	1	1	1	1	446	0	0	0	0	0	0	53
NADH16pp_b2276	201	0.182983	0.815464	0	45	99	185	157	0.604938	0.407407	0.703704	1458	486	55	1	11	9	25	45	7	30	8	87	19	13	21	11	14	37	16	46	9	21	42.571	0.671	0	0	0	0	0	0	485	1	10	0.295894	0	2.13e-05	2.13e-05	302
MALTabcpp_b4033	85	0.178354	0.760441	0	67	101	163	184	0.526214	0.398058	0.673786	1545	515	44	3	21	15	34	46	1	31	23	68	16	24	21	22	16	24	39	31	12	23	41.906	0.649	1	0	0	0	0	0	514	0	0	0	0	0	0	0
MALTHXabcpp_b4035	138	0.557362	0.951593	0	68	82	118	104	0.682796	0.365591	0.596774	1116	372	28	3	17	26	11	28	10	21	15	40	11	13	20	22	24	17	14	43	2	6	47.748	0.646	12	12	12	12	12	12	371	0	0	0	0	0	0	0
GART_b1849	182	0.521153	1.13449	0	74	123	100	96	0.689567	0.424936	0.498728	1179	393	45	5	18	30	13	35	9	21	11	38	9	6	17	21	27	20	16	41	2	8	47.389	0.598	0	0	0	0	0	0	392	0	0	0	0	0	0	136
TMAtex_b0929	44	1.53858	2.15677	0	56	129	52	126	0.556474	0.385675	0.490358	1089	363	34	0	27	14	19	49	1	14	19	23	5	32	5	13	12	16	22	26	2	29	37.082	0.832	3	3	3	3	3	3	362	0	0	0	0	0	0	0
HCINNMtex_b0241	57	0.045701	0.726706	0	70	118	72	92	0.502841	0.372159	0.465909	1056	352	31	0	31	14	21	37	1	14	25	23	9	27	3	17	12	21	24	16	3	22	46.295	0.669	3	3	3	3	3	3	351	0	0	0	0	0	0	0
ACACT5r_b2342	127	0.202332	1.34639	2	82	117	128	110	0.649886	0.480549	0.544622	1311	437	63	2	19	23	13	39	9	19	13	46	16	10	19	18	31	25	28	32	3	8	51.067	0.599	2	2	2	2	2	2	436	3	1	1	0	4.27e-05	4.27e-05	174
Zn2tex_b2215	64	0.0280042	1.90111	9	51	107	58	152	0.570652	0.377717	0.570652	1104	368	29	0	32	11	19	48	1	10	17	27	4	32	4	21	13	17	24	25	4	29	29.032	0.898	3	3	3	3	3	3	367	336	9	0.424022	0.000798	0.00359666	0.00359666	91
SO4tex_b1377	49	0.0274733	0.683685	1	68	140	60	110	0.550265	0.399471	0.449735	1134	378	42	0	37	12	19	43	5	9	17	27	9	33	5	14	11	21	24	17	5	27	40.354	0.74	3	3	3	3	3	3	377	165	10	0.374732	0.000184	0.00177165	0.00177165	91
CRNtex_b2215	64	0.0280042	1.90111	9	51	107	58	152	0.570652	0.377717	0.570652	1104	368	29	0	32	11	19	48	1	10	17	27	4	32	4	21	13	17	24	25	4	29	29.032	0.898	3	3	3	3	3	3	367	0	0	0	0	0	0	0
RIBabcpp_b3751	112	0.323972	1.04422	0	51	77	91	78	0.646465	0.37037	0.569024	891	297	44	0	21	11	7	24	3	13	26	28	7	18	9	17	6	12	15	32	0	3	43.075	0.712	0	0	0	0	0	0	296	0	0	0	0	0	0	0
PLIPA1G180pp_b3821	101	0.0282509	0.656571	0	38	73	92	87	0.524138	0.396552	0.617241	870	290	18	0	16	15	10	23	5	9	10	29	8	20	13	12	13	19	18	18	10	23	46.721	0.641	0	0	0	0	0	0	289	4	9	0.218633	6.04e-05	5.34e-05	5.34e-05	198
G3PCabcpp_b3451	113	0.301202	1.14633	2	26	48	113	95	0.510638	0.382979	0.737589	846	282	25	1	8	9	23	14	3	25	5	37	16	11	15	5	10	12	23	26	8	5	41.782	0.626	2	0	0	0	0	0	281	0	0	0	0	0	0	0
HYD2pp_b2994	73	0.313146	0.661274	0	79	143	174	172	0.577465	0.401408	0.609155	1704	568	46	8	31	30	15	42	18	39	29	45	11	30	30	21	20	36	33	51	13	19	39.184	0.759	1	1	1	1	1	1	567	1	13	0.194414	0	2.13e-05	2.13e-05	261
PUNP5_b4384	173	0.156214	1.07229	0	38	61	46	95	0.591667	0.391667	0.5875	720	240	26	4	19	14	12	23	6	18	14	15	12	7	6	2	12	9	14	20	0	6	35.287	0.824	0	0	0	0	0	0	239	0	0	0	0	0	0	291
5MTRtex_b0241	57	0.045701	0.726706	0	70	118	72	92	0.502841	0.372159	0.465909	1056	352	31	0	31	14	21	37	1	14	25	23	9	27	3	17	12	21	24	16	3	22	46.295	0.669	3	3	3	3	3	3	351	37	10	0.357455	6.99e-05	0.000406	0.000406	306
DHAtex_b0929	44	1.53858	2.15677	0	56	129	52	126	0.556474	0.385675	0.490358	1089	363	34	0	27	14	19	49	1	14	19	23	5	32	5	13	12	16	22	26	2	29	37.082	0.832	3	3	3	3	3	3	362	3	11	0.314667	0	4.27e-05	4.27e-05	261
GALCTNLtex_b2215	64	0.0280042	1.90111	9	51	107	58	152	0.570652	0.377717	0.570652	1104	368	29	0	32	11	19	48	1	10	17	27	4	32	4	21	13	17	24	25	4	29	29.032	0.898	3	3	3	3	3	3	367	0	0	0	0	0	0	0
CITtex_b2215	64	0.0280042	1.90111	9	51	107	58	152	0.570652	0.377717	0.570652	1104	368	29	0	32	11	19	48	1	10	17	27	4	32	4	21	13	17	24	25	4	29	29.032	0.898	3	3	3	3	3	3	367	3	11	0.31491	0.000829	4.27e-05	4.27e-05	261
MALTHXtexi_b4036	60	0.669972	1.19331	0	59	121	97	170	0.530201	0.422819	0.597315	1341	447	40	2	33	21	20	49	6	20	20	22	16	31	9	22	17	28	25	24	19	22	41.864	0.773	0	0	0	0	0	0	446	0	0	0	0	0	0	0
GTPtex_b0929	44	1.53858	2.15677	0	56	129	52	126	0.556474	0.385675	0.490358	1089	363	34	0	27	14	19	49	1	14	19	23	5	32	5	13	12	16	22	26	2	29	37.082	0.832	3	3	3	3	3	3	362	0	0	0	0	0	0	0
3UMPtex_b0929	44	1.53858	2.15677	0	56	129	52	126	0.556474	0.385675	0.490358	1089	363	34	0	27	14	19	49	1	14	19	23	5	32	5	13	12	16	22	26	2	29	37.082	0.832	3	3	3	3	3	3	362	0	0	0	0	0	0	0
NADH16pp_b2280	108	0.215491	0.849725	0	27	41	67	50	0.616216	0.367568	0.632432	555	185	22	1	4	11	9	16	4	19	5	25	6	4	5	4	6	9	6	20	2	6	42.168	0.659	0	0	0	0	0	0	184	1	10	0.295894	0	2.13e-05	2.13e-05	302
23CGMPtex_b1377	49	0.0274733	0.683685	1	68	140	60	110	0.550265	0.399471	0.449735	1134	378	42	0	37	12	19	43	5	9	17	27	9	33	5	14	11	21	24	17	5	27	40.354	0.74	3	3	3	3	3	3	377	0	0	0	0	0	0	0
TDSR2_b0604	95	0.00471655	0.646803	0	69	56	64	60	0.542169	0.365462	0.497992	747	249	24	2	12	14	5	18	2	16	24	25	10	10	16	14	4	10	12	14	5	11	56.089	0.534	0	0	0	0	0	0	248	0	0	0	0	0	0	0
MNLptspp_b2416	315	0.342568	1.34241	0	114	167	148	147	0.619792	0.357639	0.512153	1728	576	63	4	39	60	18	36	8	51	35	58	18	17	15	21	31	26	29	35	2	9	43.52	0.718	0	0	0	0	0	0	575	0	0	0	0	0	0	0
NI2tex_b0929	44	1.53858	2.15677	0	56	129	52	126	0.556474	0.385675	0.490358	1089	363	34	0	27	14	19	49	1	14	19	23	5	32	5	13	12	16	22	26	2	29	37.082	0.832	3	3	3	3	3	3	362	336	9	0.424022	0.000798	0.00359666	0.00359666	91
GLCNt2rpp_b4321	42	0.0274591	0.629531	0	55	104	169	120	0.5625	0.383929	0.645089	1344	448	53	1	13	7	20	39	8	50	14	60	24	16	20	8	5	24	23	48	7	7	43.833	0.679	2	2	2	2	2	2	447	6	11	0.315234	0.000578	7.47e-05	7.47e-05	261
GALCTNLtex_b0241	57	0.045701	0.726706	0	70	118	72	92	0.502841	0.372159	0.465909	1056	352	31	0	31	14	21	37	1	14	25	23	9	27	3	17	12	21	24	16	3	22	46.295	0.669	3	3	3	3	3	3	351	0	0	0	0	0	0	0
BWCOGDS1_b3857	129	0.0333441	0.590415	0	48	60	52	35	0.666667	0.389744	0.446154	585	195	19	2	12	12	5	15	8	6	7	22	7	8	11	9	12	5	7	19	4	4	50.205	0.536	0	0	0	0	0	0	194	0	0	0	0	0	0	0
CTBTabcpp_b2677	196	0.0883796	1.01255	0	96	109	95	101	0.618454	0.36409	0.488778	1203	401	36	1	27	29	13	32	6	31	20	45	13	14	15	21	27	20	14	28	0	8	47.863	0.524	18	18	18	18	18	17	400	1	1	1	0	2.13e-05	2.13e-05	74
PNTOtex_b2215	64	0.0280042	1.90111	9	51	107	58	152	0.570652	0.377717	0.570652	1104	368	29	0	32	11	19	48	1	10	17	27	4	32	4	21	13	17	24	25	4	29	29.032	0.898	3	3	3	3	3	3	367	0	0	0	0	0	0	0
ATPS4rpp_b3739	47	0.0525263	0.835005	0	25	24	52	26	0.590551	0.362205	0.614173	381	127	16	0	1	1	9	7	2	6	6	23	3	4	5	3	4	7	3	22	4	0	51.4	0.502	0	0	0	0	0	0	126	0	0	0	0	0	0	60
PPTHpp_b0383	77	0.285747	0.726994	0	100	131	122	119	0.620763	0.470339	0.510593	1416	472	67	4	28	24	9	45	10	17	30	44	8	20	23	23	14	23	43	25	3	11	47.21	0.618	0	0	0	0	0	0	471	0	0	0	0	0	0	0
FUCtex_b0929	44	1.53858	2.15677	0	56	129	52	126	0.556474	0.385675	0.490358	1089	363	34	0	27	14	19	49	1	14	19	23	5	32	5	13	12	16	22	26	2	29	37.082	0.832	3	3	3	3	3	3	362	0	0	0	0	0	0	0
INSTtex_b0241	57	0.045701	0.726706	0	70	118	72	92	0.502841	0.372159	0.465909	1056	352	31	0	31	14	21	37	1	14	25	23	9	27	3	17	12	21	24	16	3	22	46.295	0.669	3	3	3	3	3	3	351	0	0	0	0	0	0	0
ARAI_b0062	154	0.0803871	0.581777	0	59	109	155	178	0.61477	0.38523	0.664671	1503	501	43	7	33	24	23	39	21	24	23	48	17	22	19	26	24	17	33	35	11	11	39.269	0.728	0	0	0	0	0	0	500	0	0	0	0	0	0	0
PDE1_b1489	83	0.025828	0.552918	0	148	208	205	239	0.5875	0.36375	0.555	2400	800	62	8	44	63	29	45	23	67	32	82	26	38	35	40	47	52	28	49	13	16	46.972	0.608	0	0	0	0	0	0	799	1	1	1	0	2.13e-05	2.13e-05	28
GLYCtex_b2215	64	0.0280042	1.90111	9	51	107	58	152	0.570652	0.377717	0.570652	1104	368	29	0	32	11	19	48	1	10	17	27	4	32	4	21	13	17	24	25	4	29	29.032	0.898	3	3	3	3	3	3	367	2	11	0.314587	0	3.2e-05	3.2e-05	261
MEOHtex_b1377	49	0.0274733	0.683685	1	68	140	60	110	0.550265	0.399471	0.449735	1134	378	42	0	37	12	19	43	5	9	17	27	9	33	5	14	11	21	24	17	5	27	40.354	0.74	3	3	3	3	3	3	377	303	9	0.420096	0.00129598	0.00324447	0.00324447	91
AGM3PApp_b4169	62	0.224815	0.757238	0	67	119	141	119	0.603139	0.466368	0.58296	1338	446	45	1	24	16	11	32	8	24	16	38	7	25	29	24	30	35	33	35	3	9	47.368	0.591	2	2	2	2	2	2	445	8	11	0.253204	972000000	9.61e-05	9.61e-05	306
FACOAL180t2pp_b1701	35	0.233017	0.883692	1	125	158	141	125	0.582878	0.420765	0.484517	1647	549	53	15	30	33	20	35	13	28	27	63	13	13	27	23	30	31	32	38	8	16	48.624	0.556	0	0	0	0	0	0	548	24	8	0.273133	0.0261772	0.000267	0.000267	198
GAL1Ptex_b1377	49	0.0274733	0.683685	1	68	140	60	110	0.550265	0.399471	0.449735	1134	378	42	0	37	12	19	43	5	9	17	27	9	33	5	14	11	21	24	17	5	27	40.354	0.74	3	3	3	3	3	3	377	0	0	0	0	0	0	0
DGMPtex_b0241	57	0.045701	0.726706	0	70	118	72	92	0.502841	0.372159	0.465909	1056	352	31	0	31	14	21	37	1	14	25	23	9	27	3	17	12	21	24	16	3	22	46.295	0.669	3	3	3	3	3	3	351	0	0	0	0	0	0	0
GLYAT_b3617	287	0.634188	0.82163	0	57	122	118	102	0.649123	0.426065	0.551378	1197	399	56	6	24	26	17	37	10	24	16	33	12	13	7	16	25	20	16	27	2	11	39.656	0.711	1	1	1	1	1	1	398	0	0	0	0	0	0	149
ACMUMtex_b1377	49	0.0274733	0.683685	1	68	140	60	110	0.550265	0.399471	0.449735	1134	378	42	0	37	12	19	43	5	9	17	27	9	33	5	14	11	21	24	17	5	27	40.354	0.74	3	3	3	3	3	3	377	0	0	0	0	0	0	0
G6Ptex_b2215	64	0.0280042	1.90111	9	51	107	58	152	0.570652	0.377717	0.570652	1104	368	29	0	32	11	19	48	1	10	17	27	4	32	4	21	13	17	24	25	4	29	29.032	0.898	3	3	3	3	3	3	367	0	0	0	0	0	0	0
CU2tex_b0241	57	0.045701	0.726706	0	70	118	72	92	0.502841	0.372159	0.465909	1056	352	31	0	31	14	21	37	1	14	25	23	9	27	3	17	12	21	24	16	3	22	46.295	0.669	3	3	3	3	3	3	351	336	9	0.424022	0.000798	0.00359666	0.00359666	91
NADTRHD_b3962	104	0.131517	0.895796	0	81	122	103	161	0.595289	0.394004	0.56531	1401	467	40	8	25	28	15	43	21	36	17	36	12	21	15	20	26	26	24	30	2	21	46.189	0.656	0	0	0	0	0	0	466	0	0	0	0	0	0	229
MALTTRtexi_b4036	60	0.669972	1.19331	0	59	121	97	170	0.530201	0.422819	0.597315	1341	447	40	2	33	21	20	49	6	20	20	22	16	31	9	22	17	28	25	24	19	22	41.864	0.773	0	0	0	0	0	0	446	0	0	0	0	0	0	0
DALAtex_b0929	44	1.53858	2.15677	0	56	129	52	126	0.556474	0.385675	0.490358	1089	363	34	0	27	14	19	49	1	14	19	23	5	32	5	13	12	16	22	26	2	29	37.082	0.832	3	3	3	3	3	3	362	10	11	0.321269	2.78e-05	0.000117	0.000117	306
OXDHCOAT_b1397	231	0.223808	0.904208	0	80	111	126	85	0.669154	0.485075	0.524876	1206	402	59	6	20	24	10	41	7	24	8	43	14	15	18	15	32	20	17	25	1	2	47.574	0.555	2	2	2	2	2	2	401	0	0	0	0	0	0	0
ASO3tex_b2215	64	0.0280042	1.90111	9	51	107	58	152	0.570652	0.377717	0.570652	1104	368	29	0	32	11	19	48	1	10	17	27	4	32	4	21	13	17	24	25	4	29	29.032	0.898	3	3	3	3	3	3	367	0	0	0	0	0	0	0
NI2t3pp_b3915	77	0.142359	0.60213	0	47	88	115	51	0.58804	0.425249	0.551495	903	301	31	2	16	9	9	20	9	25	3	38	11	4	11	16	18	28	12	24	6	8	49.348	0.5	0	0	0	0	0	0	300	0	0	0	0	0	0	239
CPPPGO_b2436	299	0.0153824	0.631988	0	43	83	77	97	0.636667	0.423333	0.58	900	300	23	4	19	21	22	29	10	7	10	21	7	9	17	12	24	11	11	21	8	13	46.601	0.641	0	0	0	0	0	0	299	28	10	0.359659	5.27e-06	0.00031	0.00031	261
DINSt2pp_b2964	18	0.0429157	0.914842	0	52	100	131	136	0.470167	0.384248	0.637232	1257	419	37	4	10	7	38	30	7	40	14	47	24	12	13	15	7	32	28	30	10	13	43.146	0.717	1	1	1	1	1	1	418	0	0	0	0	0	0	0
DKGLCNR2x_b3553	279	0.313369	1.12824	0	76	69	82	98	0.621538	0.384615	0.553846	975	325	40	4	18	22	11	19	14	15	13	36	10	15	13	11	14	14	19	28	2	6	50.321	0.588	0	0	0	0	0	0	324	0	0	0	0	0	0	0
NTD12pp_b4055	74	0.14684	0.511661	0	47	74	53	64	0.542017	0.44958	0.491597	714	238	23	1	14	11	13	15	3	16	12	14	5	15	16	8	13	20	13	16	5	4	52.306	0.599	0	0	0	0	0	0	237	0	0	0	0	0	0	0
SKMtex_b0929	44	1.53858	2.15677	0	56	129	52	126	0.556474	0.385675	0.490358	1089	363	34	0	27	14	19	49	1	14	19	23	5	32	5	13	12	16	22	26	2	29	37.082	0.832	3	3	3	3	3	3	362	0	0	0	0	0	0	0
DAPtex_b0929	44	1.53858	2.15677	0	56	129	52	126	0.556474	0.385675	0.490358	1089	363	34	0	27	14	19	49	1	14	19	23	5	32	5	13	12	16	22	26	2	29	37.082	0.832	3	3	3	3	3	3	362	6	11	0.315396	0.000255	7.47e-05	7.47e-05	261
CHORS_b2329	594	0.207831	0.745804	0	51	84	87	140	0.635359	0.439227	0.627072	1086	362	31	4	29	19	11	40	8	29	16	26	9	8	17	16	26	18	21	24	2	7	43.69	0.674	0	0	0	0	0	0	361	169	10	0.375421	0.000169	0.00181434	0.00181434	91
PFL_b3952	59	0.260664	0.855939	2	48	66	109	70	0.604096	0.433447	0.610922	879	293	23	10	16	19	11	21	4	16	12	33	9	9	15	11	25	17	13	22	3	3	46.588	0.572	0	0	0	0	0	0	292	0	0	0	0	0	0	271
SLNTtpp_b2422	204	0.198418	1.65513	8	49	81	133	103	0.70765	0.407104	0.644809	1098	366	32	0	19	24	15	27	14	15	11	42	7	8	19	24	31	16	18	31	5	7	39.016	0.683	17	17	17	17	17	16	365	0	0	0	0	0	0	0
MN2t3pp_b0752	222	0.146517	0.843698	2	50	87	100	77	0.636943	0.39172	0.563694	942	314	32	3	12	16	9	20	25	21	4	45	11	9	14	7	16	17	14	27	7	4	55.159	0.539	0	0	0	0	0	0	313	0	0	0	0	0	0	219
MDH_b3236	51	0.649133	1.452	3	60	98	76	79	0.658147	0.415335	0.495208	939	313	35	3	12	20	10	36	2	17	21	33	4	11	13	14	8	17	18	34	0	4	39.401	0.766	0	0	0	0	0	0	312	2	1	1	0	3.2e-05	3.2e-05	192
ADMDC_b0120	118	0.329607	1.15261	0	38	82	58	87	0.524528	0.313208	0.54717	795	265	14	6	19	22	9	11	12	24	16	24	8	13	11	6	10	14	16	14	1	14	42.278	0.677	0	0	0	0	0	0	264	37	10	0.357455	6.99e-05	0.000406	0.000406	306
AGMtex_b2215	64	0.0280042	1.90111	9	51	107	58	152	0.570652	0.377717	0.570652	1104	368	29	0	32	11	19	48	1	10	17	27	4	32	4	21	13	17	24	25	4	29	29.032	0.898	3	3	3	3	3	3	367	9	11	0.316783	1.08e-05	0.000107	0.000107	261
GSPMDS_b2988	66	0.380889	0.932586	0	92	149	192	187	0.596774	0.366129	0.61129	1860	620	41	9	42	47	25	48	19	38	31	62	11	25	27	30	30	24	31	39	17	23	42.346	0.692	0	0	0	0	0	0	619	1	1	1	0	2.13e-05	2.13e-05	164
MANGLYCtex_b0241	57	0.045701	0.726706	0	70	118	72	92	0.502841	0.372159	0.465909	1056	352	31	0	31	14	21	37	1	14	25	23	9	27	3	17	12	21	24	16	3	22	46.295	0.669	3	3	3	3	3	3	351	0	0	0	0	0	0	0
FRD3_b4154	87	0.016741	1.06819	0	97	143	152	211	0.656716	0.432836	0.60199	1809	603	61	10	35	44	20	66	21	23	27	48	20	23	22	22	38	20	36	42	7	17	39.172	0.768	1	1	1	1	1	1	602	6	14	0.163268	0.00414747	7.47e-05	7.47e-05	261
RMNtex_b1377	49	0.0274733	0.683685	1	68	140	60	110	0.550265	0.399471	0.449735	1134	378	42	0	37	12	19	43	5	9	17	27	9	33	5	14	11	21	24	17	5	27	40.354	0.74	3	3	3	3	3	3	377	0	0	0	0	0	0	0
FE3DHBZStonex_b2155	85	0.579884	1.41942	1	104	168	162	230	0.558735	0.433735	0.590361	1992	664	36	4	54	37	23	59	9	25	34	48	7	41	27	19	38	56	50	51	17	28	43.387	0.681	0	0	0	0	0	0	663	0	0	0	0	0	0	0
TTDCEAtexi_b2344	76	0.186239	1.56634	0	71	150	93	133	0.519016	0.469799	0.505593	1341	447	50	0	25	13	25	45	5	21	14	31	7	33	16	22	15	39	32	18	12	23	45.305	0.702	0	0	0	0	0	0	446	0	0	0	0	0	0	0
SELR_b1587	28	0.0245439	0.39575	0	160	217	173	259	0.55377	0.435105	0.533993	2427	809	66	12	43	49	18	66	15	56	50	58	20	43	43	27	49	52	49	45	15	32	48.901	0.619	3	2	2	2	2	2	808	0	0	0	0	0	0	0
Kt2pp_b3849	217	0.00521024	0.431025	0	52	129	159	144	0.53719	0.429752	0.626033	1452	484	45	5	13	13	41	44	7	40	12	65	15	15	18	8	21	29	33	37	12	10	44.759	0.59	1	1	1	1	1	1	483	2	10	0.311546	1.05e-06	3.2e-05	3.2e-05	302
SHK3Dr_b1692	102	0.16355	0.757777	0	67	78	69	75	0.550173	0.384083	0.49827	867	289	30	4	17	18	12	29	4	14	19	31	11	13	10	13	7	9	19	17	2	9	55.351	0.561	0	0	0	0	0	0	288	169	10	0.375421	0.000169	0.00181434	0.00181434	91
DUMPtex_b1377	49	0.0274733	0.683685	1	68	140	60	110	0.550265	0.399471	0.449735	1134	378	42	0	37	12	19	43	5	9	17	27	9	33	5	14	11	21	24	17	5	27	40.354	0.74	3	3	3	3	3	3	377	0	0	0	0	0	0	0
HXPRT_b0125	369	0.0584745	0.895375	2	27	48	56	48	0.597765	0.340782	0.581006	537	179	7	2	15	15	6	12	3	16	10	17	7	2	6	3	13	14	7	17	0	6	34.766	0.761	0	0	0	0	0	0	178	0	0	0	0	0	0	180
MLTG5_b0403	60	0.0352794	0.304984	0	96	161	207	141	0.647934	0.414876	0.575207	1815	605	51	7	45	27	26	45	22	21	19	57	15	21	37	41	40	26	23	38	22	21	46.909	0.604	0	0	0	0	0	0	604	1	1	1	0	2.13e-05	2.13e-05	217
GLYCL_b2904	510	0.0114225	0.894339	0	38	21	33	38	0.638462	0.392308	0.546154	390	130	17	1	11	17	2	8	2	5	6	12	2	3	5	1	1	12	5	12	2	5	35.807	0.78	0	0	0	0	0	0	129	1	10	0.295894	0	2.13e-05	2.13e-05	302
GAMptspp_b2416	315	0.342568	1.34241	0	114	167	148	147	0.619792	0.357639	0.512153	1728	576	63	4	39	60	18	36	8	51	35	58	18	17	15	21	31	26	29	35	2	9	43.52	0.718	0	0	0	0	0	0	575	0	0	0	0	0	0	0
TUNGSabcpp_b0764	254	0.0781778	0.842045	0	40	60	75	55	0.573913	0.482609	0.565217	690	230	24	2	4	9	15	20	1	18	3	36	6	1	12	3	17	16	14	19	6	3	45.175	0.559	1	1	0	0	0	0	229	0	0	0	0	0	0	0
XYLtex_b0929	44	1.53858	2.15677	0	56	129	52	126	0.556474	0.385675	0.490358	1089	363	34	0	27	14	19	49	1	14	19	23	5	32	5	13	12	16	22	26	2	29	37.082	0.832	3	3	3	3	3	3	362	0	0	0	0	0	0	0
PTAr_b2458	86	0.0134147	0.449103	0	64	73	112	90	0.684366	0.466077	0.59587	1017	339	52	6	12	20	11	23	6	16	9	38	9	9	23	20	21	19	11	27	2	4	47.583	0.573	1	1	1	1	1	1	338	1	1	1	0	2.13e-05	2.13e-05	16
GALURtex_b2215	64	0.0280042	1.90111	9	51	107	58	152	0.570652	0.377717	0.570652	1104	368	29	0	32	11	19	48	1	10	17	27	4	32	4	21	13	17	24	25	4	29	29.032	0.898	3	3	3	3	3	3	367	0	0	0	0	0	0	0
S2FE2SS_b1681	47	0.201335	0.975905	1	80	94	137	113	0.620283	0.389151	0.589623	1272	424	44	3	21	25	15	29	23	21	15	49	6	24	13	29	24	23	25	24	3	7	43.261	0.61	0	0	0	0	0	0	423	272	9	0.398115	0.000782	0.00291362	0.00291362	91
UDCPDP_b3057	359	0.0944799	0.825933	0	33	64	112	65	0.536496	0.390511	0.645985	822	274	25	3	7	9	23	27	7	25	8	37	14	2	11	5	10	16	12	23	3	6	41.864	0.607	0	0	0	0	0	0	273	198	10	0.335433	0.00134128	0.00212385	0.00212385	306
PYDXtex_b2215	64	0.0280042	1.90111	9	51	107	58	152	0.570652	0.377717	0.570652	1104	368	29	0	32	11	19	48	1	10	17	27	4	32	4	21	13	17	24	25	4	29	29.032	0.898	3	3	3	3	3	3	367	0	0	0	0	0	0	0
3OXCOAT_b1397	231	0.223808	0.904208	0	80	111	126	85	0.669154	0.485075	0.524876	1206	402	59	6	20	24	10	41	7	24	8	43	14	15	18	15	32	20	17	25	1	2	47.574	0.555	2	2	2	2	2	2	401	0	0	0	0	0	0	0
MN6PP_b0822	31	0.0348299	0.45942	0	53	78	66	75	0.573529	0.308824	0.518382	816	272	23	1	18	15	15	17	8	18	19	27	8	17	10	13	9	15	7	20	1	10	53.66	0.624	0	0	0	0	0	0	271	1	4	0.416667	0	2.13e-05	2.13e-05	276
ALLTAMH_b0516	68	0.11813	0.758213	3	80	110	119	103	0.587379	0.415049	0.538835	1236	412	33	8	23	28	17	33	9	22	15	34	14	21	21	17	23	17	29	30	7	10	47.856	0.604	0	0	0	0	0	0	411	7	12	0.24349	0.000176	8.54e-05	8.54e-05	261
S2FE2ST_b1681	47	0.201335	0.975905	1	80	94	137	113	0.620283	0.389151	0.589623	1272	424	44	3	21	25	15	29	23	21	15	49	6	24	13	29	24	23	25	24	3	7	43.261	0.61	0	0	0	0	0	0	423	270	9	0.405898	0.000782	0.00289227	0.00289227	91
H2Otpp_b0875	188	0.274706	0.748231	0	37	82	55	58	0.594828	0.487069	0.487069	696	232	34	2	3	7	18	35	5	17	5	26	3	4	9	3	5	12	11	22	5	5	46.769	0.679	0	0	0	0	0	0	231	0	0	0	0	0	0	171
GAMAN6Ptex_b1377	49	0.0274733	0.683685	1	68	140	60	110	0.550265	0.399471	0.449735	1134	378	42	0	37	12	19	43	5	9	17	27	9	33	5	14	11	21	24	17	5	27	40.354	0.74	3	3	3	3	3	3	377	0	0	0	0	0	0	0
LDH_D_b1380	155	0.34147	0.646327	0	60	85	89	96	0.587879	0.354545	0.560606	990	330	30	6	18	25	18	23	7	14	19	38	10	18	9	11	14	16	19	23	0	11	41.814	0.734	0	0	0	0	0	0	329	0	0	0	0	0	0	194
QUIN2tex_b0929	44	1.53858	2.15677	0	56	129	52	126	0.556474	0.385675	0.490358	1089	363	34	0	27	14	19	49	1	14	19	23	5	32	5	13	12	16	22	26	2	29	37.082	0.832	3	3	3	3	3	3	362	6	11	0.31491	0	7.47e-05	7.47e-05	261
PPAtex_b1377	49	0.0274733	0.683685	1	68	140	60	110	0.550265	0.399471	0.449735	1134	378	42	0	37	12	19	43	5	9	17	27	9	33	5	14	11	21	24	17	5	27	40.354	0.74	3	3	3	3	3	3	377	0	0	0	0	0	0	0
FHL_b2489	35	0.00606883	0.719629	0	37	72	62	82	0.636364	0.466403	0.56917	759	253	21	7	18	8	7	19	9	19	5	21	5	4	18	13	23	12	13	19	4	7	57.66	0.524	2	2	2	2	2	1	252	6	12	0.241284	0.00743898	7.47e-05	7.47e-05	261
NTD2_b4374	95	0.124313	0.588316	0	28	56	67	75	0.588496	0.389381	0.628319	678	226	20	3	14	16	13	16	5	13	8	25	4	12	8	11	10	11	13	12	6	5	47.933	0.651	0	0	0	0	0	0	225	0	0	0	0	0	0	246
DSBAO2_b1185	87	0.0342064	0.717609	0	22	49	71	35	0.581921	0.40113	0.59887	531	177	18	6	5	6	13	10	2	8	6	28	7	1	10	9	9	5	6	14	7	6	42.288	0.666	0	0	0	0	0	0	176	0	0	0	0	0	0	0
PSERtex_b0241	57	0.045701	0.726706	0	70	118	72	92	0.502841	0.372159	0.465909	1056	352	31	0	31	14	21	37	1	14	25	23	9	27	3	17	12	21	24	16	3	22	46.295	0.669	3	3	3	3	3	3	351	0	0	0	0	0	0	0
DHPTPE_b2303	46	0.0048994	0.852674	0	22	38	30	31	0.528926	0.31405	0.504132	363	121	10	0	8	9	2	1	5	14	6	10	2	9	2	5	10	5	8	8	2	4	50.842	0.654	0	0	0	0	0	0	120	0	0	0	0	0	0	0
COBALT2abcpp_b3469	302	0.316471	1.06124	0	130	151	250	202	0.656207	0.474761	0.616644	2199	733	119	9	28	47	18	59	9	45	25	91	13	21	30	26	41	35	49	55	6	6	46.137	0.614	0	0	0	0	0	0	732	1	11	0.245836	0	2.13e-05	2.13e-05	91
NACtex_b1377	49	0.0274733	0.683685	1	68	140	60	110	0.550265	0.399471	0.449735	1134	378	42	0	37	12	19	43	5	9	17	27	9	33	5	14	11	21	24	17	5	27	40.354	0.74	3	3	3	3	3	3	377	0	0	0	0	0	0	0
S2FE2SS2_b3807	97	0.133905	0.576409	0	16	21	29	41	0.598131	0.364486	0.654206	321	107	5	2	12	10	5	9	3	8	3	10	1	4	1	7	5	5	7	3	5	1	35.389	0.785	0	0	0	0	0	0	106	272	9	0.398115	0.000782	0.00291362	0.00291362	91
MCITL2_b0331	212	0.0500475	0.751656	0	36	74	96	91	0.636364	0.417508	0.62963	891	297	44	2	18	18	10	19	6	18	11	28	9	11	10	12	18	15	16	21	0	10	38.596	0.68	0	0	0	0	0	0	296	3	1	1	0	4.27e-05	4.27e-05	209
ADEt2rpp_b3654	80	0.102014	0.882976	0	60	112	165	127	0.588362	0.428879	0.62931	1392	464	46	4	6	15	19	43	4	38	7	68	20	17	28	21	14	35	25	41	4	8	43.543	0.656	1	1	1	1	1	1	463	3	11	0.314667	0	4.27e-05	4.27e-05	261
23CUMPtex_b0929	44	1.53858	2.15677	0	56	129	52	126	0.556474	0.385675	0.490358	1089	363	34	0	27	14	19	49	1	14	19	23	5	32	5	13	12	16	22	26	2	29	37.082	0.832	3	3	3	3	3	3	362	0	0	0	0	0	0	0
GLUtex_b0241	57	0.045701	0.726706	0	70	118	72	92	0.502841	0.372159	0.465909	1056	352	31	0	31	14	21	37	1	14	25	23	9	27	3	17	12	21	24	16	3	22	46.295	0.669	3	3	3	3	3	3	351	2	11	0.314587	0	3.2e-05	3.2e-05	261
G3PD5_b2243	38	0.0866391	0.721064	0	74	75	114	134	0.559194	0.435768	0.624685	1191	397	30	18	20	20	12	25	8	20	27	41	6	15	23	15	23	19	30	26	5	13	42.794	0.657	0	0	0	0	0	0	396	0	0	0	0	0	0	128
LSERDHr_b1539	247	0.0100853	0.82028	0	44	79	63	63	0.598394	0.413655	0.506024	747	249	23	2	11	17	6	23	7	14	8	21	8	16	8	9	14	9	19	22	5	6	40.515	0.66	0	0	0	0	0	0	248	2	1	1	0	3.2e-05	3.2e-05	199
TRE6PH_b4239	195	0.108381	1.13451	0	88	129	160	175	0.57971	0.405797	0.606884	1656	552	39	5	37	33	24	39	19	21	18	49	16	29	29	29	34	26	29	28	23	24	49.986	0.618	0	0	0	0	0	0	551	1	12	0.203218	0	2.13e-05	2.13e-05	322
GLNabcpp_b0811	120	0.18203	1.44595	1	46	60	65	78	0.546185	0.341365	0.574297	747	249	27	0	22	10	12	18	2	12	29	23	4	13	7	6	5	12	14	20	2	10	38.791	0.783	0	0	0	0	0	0	248	0	0	0	0	0	0	0
CYTBD2pp_b0979	31	0.29588	1.1237	0	53	77	139	110	0.530343	0.408971	0.656992	1137	379	27	5	11	8	28	33	2	24	6	64	16	10	20	9	17	21	15	34	17	11	46.852	0.569	1	1	1	1	1	1	378	0	0	0	0	0	0	82
FHL_b4079	248	0.00857657	0.385743	1	100	168	211	237	0.579609	0.425978	0.625698	2148	716	76	15	39	48	20	54	15	44	39	44	18	35	31	27	38	32	45	50	13	31	39.803	0.731	0	0	0	0	0	0	714	6	12	0.241284	0.00743898	7.47e-05	7.47e-05	261
UREAtex_b1377	49	0.0274733	0.683685	1	68	140	60	110	0.550265	0.399471	0.449735	1134	378	42	0	37	12	19	43	5	9	17	27	9	33	5	14	11	21	24	17	5	27	40.354	0.74	3	3	3	3	3	3	377	3	1	1	0	4.27e-05	4.27e-05	2
SKMtex_b1377	49	0.0274733	0.683685	1	68	140	60	110	0.550265	0.399471	0.449735	1134	378	42	0	37	12	19	43	5	9	17	27	9	33	5	14	11	21	24	17	5	27	40.354	0.74	3	3	3	3	3	3	377	0	0	0	0	0	0	0
H2O2tex_b0241	57	0.045701	0.726706	0	70	118	72	92	0.502841	0.372159	0.465909	1056	352	31	0	31	14	21	37	1	14	25	23	9	27	3	17	12	21	24	16	3	22	46.295	0.669	3	3	3	3	3	3	351	0	0	0	0	0	0	0
SERD_L_b1814	175	0.797216	1.08998	0	68	125	119	143	0.624176	0.41978	0.575824	1365	455	48	9	25	30	13	44	12	25	16	34	18	21	19	12	22	29	18	41	2	16	41.549	0.711	2	2	2	2	2	2	454	0	0	0	0	0	0	303
CTBTCAL2_b0037	17	0.00640744	0.402913	0	85	133	150	150	0.559846	0.391892	0.579151	1554	518	41	18	31	34	26	34	10	38	24	42	13	20	21	25	31	23	28	31	7	20	47.423	0.614	0	0	0	0	0	0	517	0	0	0	0	0	0	0
NO3R1pp_b1468	40	0.144639	0.873506	0	194	265	340	448	0.57899	0.440257	0.631917	3741	1247	89	17	71	71	36	102	36	62	56	104	36	55	75	50	71	87	67	71	40	50	42.521	0.665	2	1	1	1	1	1	1246	0	0	0	0	0	0	0
2AGPA120tipp_b2835	60	0.122308	0.614945	0	50	93	149	106	0.580402	0.444724	0.640704	1194	398	57	4	4	9	20	43	4	26	12	57	14	16	14	10	10	22	18	38	9	10	50.482	0.583	0	0	0	0	0	0	397	3	12	0.138293	0	4.27e-05	4.27e-05	198
3AMPtex_b0241	57	0.045701	0.726706	0	70	118	72	92	0.502841	0.372159	0.465909	1056	352	31	0	31	14	21	37	1	14	25	23	9	27	3	17	12	21	24	16	3	22	46.295	0.669	3	3	3	3	3	3	351	0	0	0	0	0	0	0
NTD10_b2744	420	0.227363	0.722778	0	37	82	73	62	0.637795	0.472441	0.531496	762	254	24	5	21	6	5	25	7	14	5	23	4	11	17	9	15	14	17	23	3	5	42.933	0.589	0	0	0	0	0	0	253	0	0	0	0	0	0	244
GMPtex_b2215	64	0.0280042	1.90111	9	51	107	58	152	0.570652	0.377717	0.570652	1104	368	29	0	32	11	19	48	1	10	17	27	4	32	4	21	13	17	24	25	4	29	29.032	0.898	3	3	3	3	3	3	367	0	0	0	0	0	0	0
THRPtex_b0241	57	0.045701	0.726706	0	70	118	72	92	0.502841	0.372159	0.465909	1056	352	31	0	31	14	21	37	1	14	25	23	9	27	3	17	12	21	24	16	3	22	46.295	0.669	3	3	3	3	3	3	351	0	0	0	0	0	0	0
R5Ptex_b1377	49	0.0274733	0.683685	1	68	140	60	110	0.550265	0.399471	0.449735	1134	378	42	0	37	12	19	43	5	9	17	27	9	33	5	14	11	21	24	17	5	27	40.354	0.74	3	3	3	3	3	3	377	0	0	0	0	0	0	0
NO3R1pp_b1227	84	0.190742	0.826859	0	19	45	94	68	0.575221	0.384956	0.716814	678	226	17	2	6	4	18	21	9	15	6	33	12	3	7	9	12	13	9	15	6	8	40.602	0.728	1	1	1	1	1	1	225	0	0	0	0	0	0	0
BMOCOS_b0827	333	0.0484977	0.55279	0	71	100	120	121	0.650485	0.456311	0.584951	1236	412	37	6	19	27	19	43	5	20	10	43	8	13	24	19	24	25	25	35	4	5	43.082	0.638	0	0	0	0	0	0	411	336	9	0.424022	0.000798	0.00359666	0.00359666	91
UREAtex_b2215	64	0.0280042	1.90111	9	51	107	58	152	0.570652	0.377717	0.570652	1104	368	29	0	32	11	19	48	1	10	17	27	4	32	4	21	13	17	24	25	4	29	29.032	0.898	3	3	3	3	3	3	367	3	1	1	0	4.27e-05	4.27e-05	2
2AGPGAT181_b2836	53	0.183582	0.630585	1	136	179	211	194	0.611111	0.405556	0.5625	2160	720	55	4	30	45	36	55	16	39	38	78	23	13	41	27	51	33	44	61	8	22	47.712	0.603	0	0	0	0	0	0	719	3	10	0.174601	0	4.27e-05	4.27e-05	198
ACS_b4069	498	0.432814	1.91848	0	83	134	211	225	0.606432	0.431853	0.667688	1959	653	58	7	39	42	17	57	19	41	33	49	13	26	36	21	29	34	42	47	19	23	39.932	0.698	0	0	0	0	0	0	652	0	0	0	0	0	0	22
NOVBCNtpp_b3035	76	0.232213	0.78678	0	80	129	139	146	0.554656	0.408907	0.576923	1482	494	57	0	25	20	10	24	3	21	18	53	6	43	17	44	22	44	36	28	1	21	45.516	0.658	0	0	0	0	0	0	493	1	1	1	0	2.13e-05	2.13e-05	242
LPLIPAL2G160_b3825	63	0.201587	0.617796	0	60	99	89	93	0.648094	0.431085	0.533724	1023	341	33	3	23	18	21	26	16	18	5	26	8	10	17	14	36	11	14	24	7	10	54.742	0.58	0	0	0	0	0	0	340	4	10	0.186425	0.00127881	5.34e-05	5.34e-05	198
TSULtex_b0929	44	1.53858	2.15677	0	56	129	52	126	0.556474	0.385675	0.490358	1089	363	34	0	27	14	19	49	1	14	19	23	5	32	5	13	12	16	22	26	2	29	37.082	0.832	3	3	3	3	3	3	362	0	0	0	0	0	0	0
FDH4pp_b3894	83	0.688935	1.16318	0	147	204	306	360	0.559489	0.438545	0.654867	3051	1017	96	14	52	54	45	92	21	46	60	84	25	58	51	37	44	55	65	53	28	35	42.631	0.697	1	1	1	1	1	1	1015	1	11	0.228715	0	2.13e-05	2.13e-05	302
FECRMabcpp_b0151	118	0.20204	0.686129	0	31	78	97	60	0.661654	0.454887	0.590226	798	266	27	2	10	16	6	24	10	14	7	35	9	4	17	10	18	17	12	17	3	7	40.624	0.625	2	2	2	2	2	2	265	8	11	0.315072	3.39e-07	9.61e-05	9.61e-05	261
RNDR2b_b1064	47	0.20258	1.64716	2	41	52	50	73	0.569444	0.333333	0.569444	648	216	18	2	19	9	7	9	4	13	18	28	6	12	12	6	11	12	6	13	2	8	49.087	0.608	0	0	0	0	0	0	215	2	13	0.194475	0	3.2e-05	3.2e-05	261
CMtpp_b2470	115	0.163002	1.06518	1	148	234	351	305	0.593449	0.408478	0.631985	3114	1038	107	4	47	47	50	81	11	56	35	110	40	42	43	55	47	67	64	90	11	30	46.359	0.628	2	2	2	2	2	2	1037	1	1	1	0	2.13e-05	2.13e-05	68
ECOAH6_b3846	59	0.0262198	1.63496	4	132	143	208	247	0.643836	0.389041	0.623288	2190	730	82	5	44	50	30	62	11	37	54	74	21	24	40	24	31	26	30	58	8	18	39.202	0.724	1	1	1	1	1	1	729	2	1	1	0	3.2e-05	3.2e-05	95
ACACT3r_b2342	127	0.202332	1.34639	2	82	117	128	110	0.649886	0.480549	0.544622	1311	437	63	2	19	23	13	39	9	19	13	46	16	10	19	18	31	25	28	32	3	8	51.067	0.599	2	2	2	2	2	2	436	3	1	1	0	4.27e-05	4.27e-05	17
LEUabcpp_b3458	61	1.09701	1.53818	10	57	88	110	115	0.6	0.416216	0.608108	1110	370	47	2	29	15	9	39	5	27	27	23	12	15	15	18	11	19	16	23	4	13	43.429	0.686	1	1	1	1	1	1	369	1	13	0.193553	0	2.13e-05	2.13e-05	261
ECOAH3_b2341	124	0.0138785	1.06552	4	141	202	204	168	0.61958	0.427972	0.52028	2145	715	75	9	30	44	24	69	13	52	40	68	16	20	38	35	44	32	37	53	2	13	52.384	0.575	4	4	4	4	4	2	714	3	1	1	0	4.27e-05	4.27e-05	17
GAL1PPpp_b1002	41	0.00780505	0.943563	0	79	93	135	107	0.577295	0.386473	0.584541	1242	414	38	6	24	22	13	25	7	14	27	38	12	18	24	30	11	27	23	32	6	16	45.208	0.642	0	0	0	0	0	0	413	0	0	0	0	0	0	0
PGPP141_b1278	82	0.0324914	0.618938	0	72	65	75	43	0.588235	0.466667	0.462745	765	255	29	2	3	15	11	15	6	16	10	32	5	3	13	11	18	10	15	21	17	2	55.788	0.485	0	0	0	0	0	0	254	2	14	0.108725	3.19e-05	3.2e-05	3.2e-05	198
LPLIPAL1A161pp_b0494	210	0.032285	0.623363	0	31	51	67	60	0.593301	0.382775	0.607656	627	209	22	0	12	7	11	10	4	7	8	29	7	11	14	17	11	11	6	10	6	5	46.887	0.587	0	0	0	0	0	0	208	2	10	0.179883	0	3.2e-05	3.2e-05	198
NTPP3_b1759	229	0.0503491	0.485034	0	31	34	41	30	0.713235	0.411765	0.522059	408	136	20	1	6	15	3	8	7	8	3	14	3	0	8	9	9	5	2	9	3	2	57.227	0.539	1	0	0	0	0	0	135	0	0	0	0	0	0	255
Zn2tex_b1377	49	0.0274733	0.683685	1	68	140	60	110	0.550265	0.399471	0.449735	1134	378	42	0	37	12	19	43	5	9	17	27	9	33	5	14	11	21	24	17	5	27	40.354	0.74	3	3	3	3	3	3	377	336	9	0.424022	0.000798	0.00359666	0.00359666	91
TDSR2_b4136	108	0.141265	0.553314	0	98	122	177	169	0.59894	0.422261	0.611307	1698	566	62	8	21	15	32	44	9	29	16	79	14	13	31	43	19	24	39	40	11	16	46.635	0.563	0	0	0	0	0	0	565	0	0	0	0	0	0	0
LEUt2rpp_b0401	115	0.11859	0.618946	0	52	119	139	130	0.593182	0.463636	0.611364	1320	440	57	5	10	6	26	40	6	32	5	61	10	9	20	11	14	32	28	47	8	12	40.858	0.696	0	0	0	0	0	0	439	3	12	0.239961	0.000831	4.27e-05	4.27e-05	261
PHEtex_b0241	57	0.045701	0.726706	0	70	118	72	92	0.502841	0.372159	0.465909	1056	352	31	0	31	14	21	37	1	14	25	23	9	27	3	17	12	21	24	16	3	22	46.295	0.669	3	3	3	3	3	3	351	5	11	0.31491	0	6.4e-05	6.4e-05	261
CRNDtex_b2215	64	0.0280042	1.90111	9	51	107	58	152	0.570652	0.377717	0.570652	1104	368	29	0	32	11	19	48	1	10	17	27	4	32	4	21	13	17	24	25	4	29	29.032	0.898	3	3	3	3	3	3	367	0	0	0	0	0	0	0
LDH_D2_b2133	84	0.228434	0.909426	1	90	141	168	173	0.604895	0.365385	0.596154	1716	572	44	6	43	37	26	43	24	25	37	58	14	22	24	19	33	26	28	34	5	23	43.753	0.648	0	0	0	0	0	0	571	0	0	0	0	0	0	195
DTMPtex_b2215	64	0.0280042	1.90111	9	51	107	58	152	0.570652	0.377717	0.570652	1104	368	29	0	32	11	19	48	1	10	17	27	4	32	4	21	13	17	24	25	4	29	29.032	0.898	3	3	3	3	3	3	367	0	0	0	0	0	0	0
IPPMIb_b0071	522	1.21769	1.29685	7	32	48	61	61	0.589109	0.351485	0.60396	606	202	22	2	16	10	17	13	6	10	11	18	4	11	10	10	7	7	8	12	2	5	42.486	0.71	0	0	0	0	0	0	201	164	10	0.374618	0.000251	0.00176098	0.00176098	91
FRD3_b4153	79	0.235623	1.04206	1	33	50	72	90	0.534694	0.412245	0.661224	735	245	24	11	14	13	9	14	6	14	14	17	9	13	14	9	10	14	12	14	2	11	38.352	0.776	1	1	1	1	1	1	244	6	14	0.163268	0.00414747	7.47e-05	7.47e-05	261
NI2tex_b1377	49	0.0274733	0.683685	1	68	140	60	110	0.550265	0.399471	0.449735	1134	378	42	0	37	12	19	43	5	9	17	27	9	33	5	14	11	21	24	17	5	27	40.354	0.74	3	3	3	3	3	3	377	336	9	0.424022	0.000798	0.00359666	0.00359666	91
LPLIPAL1E120pp_b0494	210	0.032285	0.623363	0	31	51	67	60	0.593301	0.382775	0.607656	627	209	22	0	12	7	11	10	4	7	8	29	7	11	14	17	11	11	6	10	6	5	46.887	0.587	0	0	0	0	0	0	208	3	12	0.138481	1.07e-05	4.27e-05	4.27e-05	198
IG3PS_b2025	580	0.343954	1.09241	3	54	63	55	87	0.629344	0.378378	0.548263	777	259	24	5	21	17	8	22	5	22	13	18	4	7	6	11	15	11	11	27	4	7	44.606	0.68	0	0	0	0	0	0	258	168	10	0.375536	2.39e-05	0.00180367	0.00180367	91
LALALGLUtex_b2215	64	0.0280042	1.90111	9	51	107	58	152	0.570652	0.377717	0.570652	1104	368	29	0	32	11	19	48	1	10	17	27	4	32	4	21	13	17	24	25	4	29	29.032	0.898	3	3	3	3	3	3	367	0	0	0	0	0	0	0
LEUtex_b0241	57	0.045701	0.726706	0	70	118	72	92	0.502841	0.372159	0.465909	1056	352	31	0	31	14	21	37	1	14	25	23	9	27	3	17	12	21	24	16	3	22	46.295	0.669	3	3	3	3	3	3	351	9	11	0.315396	0.000829	0.000107	0.000107	261
PHEMEabcpp_b2200	162	0.0129905	0.701443	3	37	47	88	49	0.628959	0.429864	0.61991	663	221	28	0	6	5	10	16	3	15	2	51	10	1	16	5	9	10	11	15	5	2	49.154	0.529	0	0	0	0	0	0	220	18	11	0.317029	1.02e-05	0.000203	0.000203	261
UACGALPpp_b0480	71	0.26015	0.883051	0	100	142	176	133	0.597096	0.368421	0.560799	1653	551	48	2	38	35	19	50	10	28	41	44	16	27	26	28	20	21	29	40	7	21	41.884	0.666	0	0	0	0	0	0	550	0	0	0	0	0	0	0
DALAtex_b0241	57	0.045701	0.726706	0	70	118	72	92	0.502841	0.372159	0.465909	1056	352	31	0	31	14	21	37	1	14	25	23	9	27	3	17	12	21	24	16	3	22	46.295	0.669	3	3	3	3	3	3	351	10	11	0.321269	2.78e-05	0.000117	0.000117	306
CYTBD2pp_b0978	99	0.524511	1.00879	0	78	104	189	144	0.56699	0.407767	0.646602	1545	515	52	1	13	21	34	40	10	28	11	67	26	13	23	30	22	25	29	33	18	18	47.171	0.601	1	1	1	1	1	1	514	0	0	0	0	0	0	82
XTSNtex_b1377	49	0.0274733	0.683685	1	68	140	60	110	0.550265	0.399471	0.449735	1134	378	42	0	37	12	19	43	5	9	17	27	9	33	5	14	11	21	24	17	5	27	40.354	0.74	3	3	3	3	3	3	377	4	11	0.314991	1.12e-06	5.34e-05	5.34e-05	261
EDA_b1850	212	0.0546059	0.582003	0	38	53	73	50	0.654206	0.457944	0.574766	642	214	30	3	6	16	6	20	1	13	13	22	4	4	14	5	7	9	13	21	2	4	36.237	0.785	0	0	0	0	0	0	213	1	1	1	0	2.13e-05	2.13e-05	97
GTPtex_b2215	64	0.0280042	1.90111	9	51	107	58	152	0.570652	0.377717	0.570652	1104	368	29	0	32	11	19	48	1	10	17	27	4	32	4	21	13	17	24	25	4	29	29.032	0.898	3	3	3	3	3	3	367	0	0	0	0	0	0	0
ACMANAtex_b2215	64	0.0280042	1.90111	9	51	107	58	152	0.570652	0.377717	0.570652	1104	368	29	0	32	11	19	48	1	10	17	27	4	32	4	21	13	17	24	25	4	29	29.032	0.898	3	3	3	3	3	3	367	0	0	0	0	0	0	0
RFAMPtpp_b3035	76	0.232213	0.78678	0	80	129	139	146	0.554656	0.408907	0.576923	1482	494	57	0	25	20	10	24	3	21	18	53	6	43	17	44	22	44	36	28	1	21	45.516	0.658	0	0	0	0	0	0	493	1	1	1	0	2.13e-05	2.13e-05	299
2AGPG181tipp_b2835	60	0.122308	0.614945	0	50	93	149	106	0.580402	0.444724	0.640704	1194	398	57	4	4	9	20	43	4	26	12	57	14	16	14	10	10	22	18	38	9	10	50.482	0.583	0	0	0	0	0	0	397	4	10	0.177331	1.74e-05	5.34e-05	5.34e-05	198
POX_b0871	89	0.0612512	1.40646	3	114	120	154	185	0.616056	0.413613	0.591623	1719	573	66	10	28	38	20	48	18	32	29	55	20	17	27	20	25	33	23	44	5	14	45.399	0.624	0	0	0	0	0	0	572	1	10	0.295894	0	2.13e-05	2.13e-05	302
RIBabcpp_b3750	228	0.111612	0.823898	0	39	84	109	90	0.559006	0.425466	0.618012	966	322	39	1	4	6	10	36	2	29	9	46	10	16	6	8	10	18	23	35	4	9	48.75	0.606	6	6	6	6	6	6	321	0	0	0	0	0	0	0
OROTtex_b0929	44	1.53858	2.15677	0	56	129	52	126	0.556474	0.385675	0.490358	1089	363	34	0	27	14	19	49	1	14	19	23	5	32	5	13	12	16	22	26	2	29	37.082	0.832	3	3	3	3	3	3	362	0	0	0	0	0	0	0
PYDAMK_b2418	27	0.5487	0.654483	0	44	73	92	75	0.591549	0.387324	0.588028	852	284	27	2	19	13	6	18	5	17	12	37	5	10	12	14	12	20	16	26	3	9	49.587	0.56	0	0	0	0	0	0	283	1	1	1	0	2.13e-05	2.13e-05	181
PHEMEabcpp_b2201	143	0.169141	0.69831	0	37	49	69	53	0.639423	0.451923	0.586538	624	208	19	2	9	12	5	18	7	10	3	31	2	7	6	16	17	8	18	10	5	2	55.699	0.491	0	0	0	0	0	0	207	18	11	0.317029	1.02e-05	0.000203	0.000203	261
PLIPA1G140pp_b3821	101	0.0282509	0.656571	0	38	73	92	87	0.524138	0.396552	0.617241	870	290	18	0	16	15	10	23	5	9	10	29	8	20	13	12	13	19	18	18	10	23	46.721	0.641	0	0	0	0	0	0	289	4	11	0.147929	7.03e-05	5.34e-05	5.34e-05	197
RNDR1b_b2675	103	0.342172	0.9737	0	118	183	196	218	0.566434	0.40979	0.579021	2145	715	70	7	38	43	33	46	18	42	25	67	18	33	22	33	47	45	50	34	6	37	48.5	0.628	0	0	0	0	0	0	714	2	13	0.194475	0	3.2e-05	3.2e-05	261
FORt2pp_b2492	32	0.0221891	0.500296	0	34	79	83	87	0.487633	0.448763	0.600707	849	283	35	11	4	6	19	18	9	22	7	35	15	9	9	4	10	25	12	22	6	4	50.155	0.566	1	1	1	1	1	1	282	1	11	0.228715	0	2.13e-05	2.13e-05	302
TREtex_b1377	49	0.0274733	0.683685	1	68	140	60	110	0.550265	0.399471	0.449735	1134	378	42	0	37	12	19	43	5	9	17	27	9	33	5	14	11	21	24	17	5	27	40.354	0.74	3	3	3	3	3	3	377	0	0	0	0	0	0	0
G3PStex_b0929	44	1.53858	2.15677	0	56	129	52	126	0.556474	0.385675	0.490358	1089	363	34	0	27	14	19	49	1	14	19	23	5	32	5	13	12	16	22	26	2	29	37.082	0.832	3	3	3	3	3	3	362	0	0	0	0	0	0	0
PIt2rpp_b3493	139	0.212122	0.85746	0	51	130	173	146	0.554	0.43	0.638	1500	500	55	2	17	11	18	47	12	34	21	67	23	15	17	13	18	33	35	41	8	12	43.499	0.646	1	1	1	1	1	1	499	0	0	0	0	0	0	274
PLIPA1A120pp_b3821	101	0.0282509	0.656571	0	38	73	92	87	0.524138	0.396552	0.617241	870	290	18	0	16	15	10	23	5	9	10	29	8	20	13	12	13	19	18	18	10	23	46.721	0.641	0	0	0	0	0	0	289	3	12	0.138293	0	4.27e-05	4.27e-05	198
PTRCt2pp_b1296	52	0.153135	0.996303	2	53	103	167	139	0.538961	0.398268	0.662338	1386	462	42	2	13	10	36	32	9	28	16	60	12	17	23	9	15	31	28	51	11	16	45.255	0.613	0	0	0	0	0	0	461	1	13	0.19386	0	2.13e-05	2.13e-05	261
GALCTt2rpp_b2789	34	0.107778	0.399798	0	51	108	152	140	0.507761	0.412417	0.64745	1353	451	38	3	9	11	35	53	5	45	16	37	20	15	15	13	14	32	17	43	14	15	49.649	0.644	2	2	2	2	2	2	450	0	0	0	0	0	0	0
MCTP1Bpp_b0149	112	0.131459	0.680924	0	119	210	312	204	0.628402	0.415385	0.610651	2535	845	68	2	52	38	25	66	5	38	40	83	27	35	52	63	60	50	40	57	13	30	39.543	0.669	1	1	0	0	0	0	844	16	10	0.316537	1.03e-05	0.000181	0.000181	306
MDDEP1pp_b3182	70	0.0407299	0.377247	0	76	130	134	138	0.587866	0.437238	0.569038	1434	478	54	5	27	11	19	37	7	28	18	44	14	21	24	31	26	32	27	33	4	15	52.627	0.56	0	0	0	0	0	0	477	0	0	0	0	0	0	200
MANtex_b0929	44	1.53858	2.15677	0	56	129	52	126	0.556474	0.385675	0.490358	1089	363	34	0	27	14	19	49	1	14	19	23	5	32	5	13	12	16	22	26	2	29	37.082	0.832	3	3	3	3	3	3	362	0	0	0	0	0	0	0
GALTtex_b0929	44	1.53858	2.15677	0	56	129	52	126	0.556474	0.385675	0.490358	1089	363	34	0	27	14	19	49	1	14	19	23	5	32	5	13	12	16	22	26	2	29	37.082	0.832	3	3	3	3	3	3	362	0	0	0	0	0	0	0
PPALtex_b1377	49	0.0274733	0.683685	1	68	140	60	110	0.550265	0.399471	0.449735	1134	378	42	0	37	12	19	43	5	9	17	27	9	33	5	14	11	21	24	17	5	27	40.354	0.74	3	3	3	3	3	3	377	0	0	0	0	0	0	0
ACKr_b3115	225	0.0674756	0.421637	0	86	132	85	100	0.57072	0.419355	0.459057	1209	403	39	5	17	29	13	37	17	28	9	40	11	22	11	9	22	38	14	30	3	8	46.301	0.589	1	1	1	1	1	1	402	1	1	1	0	2.13e-05	2.13e-05	16
PUNP2_b4384	173	0.156214	1.07229	0	38	61	46	95	0.591667	0.391667	0.5875	720	240	26	4	19	14	12	23	6	18	14	15	12	7	6	2	12	9	14	20	0	6	35.287	0.824	0	0	0	0	0	0	239	0	0	0	0	0	0	288
FORt2pp_b0904	106	0.155266	1.34757	0	44	83	71	88	0.520979	0.391608	0.555944	858	286	29	5	8	8	19	26	8	21	10	33	14	13	9	3	4	13	19	28	7	8	48.495	0.629	1	1	1	1	1	1	285	1	11	0.228715	0	2.13e-05	2.13e-05	302
F6PA_b0825	65	0.211177	0.54633	0	39	63	88	31	0.651584	0.434389	0.538462	663	221	35	2	11	8	5	18	3	13	11	25	7	3	11	13	6	10	13	20	1	5	42.063	0.651	1	1	1	1	1	1	220	0	0	0	0	0	0	99
GP4GH_b0049	224	0.15554	0.754554	0	47	63	97	74	0.629893	0.434164	0.608541	843	281	24	6	20	18	11	23	7	9	13	37	6	8	19	7	15	14	13	13	8	9	45.327	0.648	0	0	0	0	0	0	280	0	0	0	0	0	0	0
ACGALtex_b2215	64	0.0280042	1.90111	9	51	107	58	152	0.570652	0.377717	0.570652	1104	368	29	0	32	11	19	48	1	10	17	27	4	32	4	21	13	17	24	25	4	29	29.032	0.898	3	3	3	3	3	3	367	0	0	0	0	0	0	0
SUCFUMtpp_b4138	114	0.173468	0.969618	0	56	112	121	145	0.559908	0.40553	0.612903	1302	434	47	5	11	12	22	35	5	43	16	56	15	13	19	8	8	30	28	47	4	9	37.626	0.749	1	1	1	1	1	1	433	0	0	0	0	0	0	0
AMPTASECG_b2523	119	0.156012	0.941693	2	60	98	148	122	0.614486	0.46028	0.630841	1284	428	56	5	31	19	13	41	7	22	20	43	9	19	14	16	23	22	27	19	9	12	42.667	0.697	1	1	1	1	1	1	427	2	13	0.194198	0	3.2e-05	3.2e-05	261
GLNtex_b0241	57	0.045701	0.726706	0	70	118	72	92	0.502841	0.372159	0.465909	1056	352	31	0	31	14	21	37	1	14	25	23	9	27	3	17	12	21	24	16	3	22	46.295	0.669	3	3	3	3	3	3	351	0	0	0	0	0	0	0
CO2tex_b0241	57	0.045701	0.726706	0	70	118	72	92	0.502841	0.372159	0.465909	1056	352	31	0	31	14	21	37	1	14	25	23	9	27	3	17	12	21	24	16	3	22	46.295	0.669	3	3	3	3	3	3	351	1	1	1	0	2.13e-05	2.13e-05	69
MOBDtex_b0241	57	0.045701	0.726706	0	70	118	72	92	0.502841	0.372159	0.465909	1056	352	31	0	31	14	21	37	1	14	25	23	9	27	3	17	12	21	24	16	3	22	46.295	0.669	3	3	3	3	3	3	351	336	9	0.424022	0.000798	0.00359666	0.00359666	91
GLXCL_b0507	67	0.172633	0.886019	9	103	171	172	148	0.641414	0.407407	0.538721	1782	594	74	12	31	37	22	44	16	39	23	43	23	19	31	26	32	20	25	56	4	16	42.672	0.707	1	1	1	1	1	1	593	0	0	0	0	0	0	148
G3PD5_b3426	127	0.0553096	0.461901	0	74	122	156	150	0.621514	0.420319	0.609562	1506	502	41	3	32	33	15	41	15	26	25	53	10	13	20	16	39	30	25	30	12	22	41.651	0.67	0	0	0	0	0	0	501	0	0	0	0	0	0	128
SHSL1_b3939	400	0.269171	1.11759	0	77	87	124	99	0.638243	0.434109	0.576227	1161	387	43	5	21	21	12	35	11	14	13	50	6	15	17	14	23	22	21	31	2	10	43.768	0.62	0	0	0	0	0	0	386	186	10	0.377388	4.38e-05	0.00199577	0.00199577	91
MSO3abcpp_b0934	131	0.143896	0.750857	0	32	55	111	66	0.560606	0.443182	0.670455	792	264	24	0	5	9	9	23	5	25	5	45	6	6	12	5	13	20	11	22	13	5	45.2	0.534	0	0	0	0	0	0	263	0	0	0	0	0	0	0
SUCMALtpp_b4138	114	0.173468	0.969618	0	56	112	121	145	0.559908	0.40553	0.612903	1302	434	47	5	11	12	22	35	5	43	16	56	15	13	19	8	8	30	28	47	4	9	37.626	0.749	1	1	1	1	1	1	433	1	13	0.193615	0	2.13e-05	2.13e-05	261
FDH4pp_b1475	74	0.120617	0.48701	0	33	69	93	100	0.579661	0.416949	0.654237	885	295	26	17	19	21	7	25	11	19	20	17	6	11	15	9	10	13	13	21	4	10	42.637	0.695	2	2	2	2	2	1	294	1	11	0.228715	0	2.13e-05	2.13e-05	302
XYLUt2pp_b3577	45	0.176158	0.765043	3	40	48	30	40	0.487342	0.392405	0.443038	474	158	15	3	4	4	9	7	3	17	4	25	3	4	6	6	6	12	9	11	4	5	51.336	0.49	0	0	0	0	0	0	157	0	0	0	0	0	0	0
ACSERtex_b0241	57	0.045701	0.726706	0	70	118	72	92	0.502841	0.372159	0.465909	1056	352	31	0	31	14	21	37	1	14	25	23	9	27	3	17	12	21	24	16	3	22	46.295	0.669	3	3	3	3	3	3	351	5	11	0.315559	3.1e-06	6.4e-05	6.4e-05	261
MNLptspp_b2415	225	0.0245069	1.24341	4	18	22	22	24	0.593023	0.395349	0.534884	258	86	9	0	1	9	4	6	2	3	7	8	2	2	2	6	1	6	10	7	0	0	38.988	0.805	1	1	1	0	0	0	85	0	0	0	0	0	0	0
5MTRtex_b0929	44	1.53858	2.15677	0	56	129	52	126	0.556474	0.385675	0.490358	1089	363	34	0	27	14	19	49	1	14	19	23	5	32	5	13	12	16	22	26	2	29	37.082	0.832	3	3	3	3	3	3	362	37	10	0.357455	6.99e-05	0.000406	0.000406	306
ASCBtex_b1377	49	0.0274733	0.683685	1	68	140	60	110	0.550265	0.399471	0.449735	1134	378	42	0	37	12	19	43	5	9	17	27	9	33	5	14	11	21	24	17	5	27	40.354	0.74	3	3	3	3	3	3	377	0	0	0	0	0	0	0
ARBTptspp_b2416	315	0.342568	1.34241	0	114	167	148	147	0.619792	0.357639	0.512153	1728	576	63	4	39	60	18	36	8	51	35	58	18	17	15	21	31	26	29	35	2	9	43.52	0.718	0	0	0	0	0	0	575	0	0	0	0	0	0	0
FEENTERtonex_b0584	58	0.696816	1.20868	3	98	177	223	249	0.542169	0.448461	0.631861	2241	747	54	2	45	39	17	77	10	37	33	54	12	58	29	32	37	49	66	43	20	32	40.149	0.692	0	0	0	0	0	0	746	7	11	0.315315	4.02e-06	8.54e-05	8.54e-05	261
DBTS_b0778	157	0.809605	0.840638	0	57	48	65	56	0.597345	0.477876	0.535398	678	226	29	2	7	13	5	18	4	9	8	25	4	8	14	10	8	12	20	17	5	7	51.322	0.531	0	0	0	0	0	0	225	303	9	0.420096	0.00129598	0.00324447	0.00324447	91
PLIPA1E140pp_b3821	101	0.0282509	0.656571	0	38	73	92	87	0.524138	0.396552	0.617241	870	290	18	0	16	15	10	23	5	9	10	29	8	20	13	12	13	19	18	18	10	23	46.721	0.641	0	0	0	0	0	0	289	5	11	0.159797	0.000208	6.4e-05	6.4e-05	197
PROabcpp_b2678	184	0.0864085	1.07266	0	31	90	128	106	0.619718	0.464789	0.659155	1065	355	38	1	15	3	13	34	3	34	4	42	14	9	26	14	17	15	25	35	9	3	45.82	0.623	0	0	0	0	0	0	354	1	13	0.193492	0	2.13e-05	2.13e-05	261
ACHBS_b3671	83	0.961624	1.24921	1	75	129	189	170	0.62167	0.42984	0.637655	1689	563	71	9	29	30	17	45	14	47	18	47	21	19	37	34	24	23	29	34	4	10	43.612	0.66	2	2	2	2	2	2	562	172	10	0.375882	0.000138	0.00184636	0.00184636	91
RMNtex_b0241	57	0.045701	0.726706	0	70	118	72	92	0.502841	0.372159	0.465909	1056	352	31	0	31	14	21	37	1	14	25	23	9	27	3	17	12	21	24	16	3	22	46.295	0.669	3	3	3	3	3	3	351	0	0	0	0	0	0	0
METSOX2tex_b0929	44	1.53858	2.15677	0	56	129	52	126	0.556474	0.385675	0.490358	1089	363	34	0	27	14	19	49	1	14	19	23	5	32	5	13	12	16	22	26	2	29	37.082	0.832	3	3	3	3	3	3	362	0	0	0	0	0	0	0
TRPS3_b1261	586	0.438094	1.3802	5	63	98	113	124	0.623116	0.422111	0.595477	1194	398	41	5	17	30	13	43	14	23	18	39	15	14	18	16	18	18	23	19	1	12	44.249	0.672	0	0	0	0	0	0	397	28	10	0.360082	7.59e-06	0.00031	0.00031	91
FDMO6_b0935	124	0.0118936	0.703392	0	68	93	119	102	0.688482	0.442408	0.578534	1146	382	46	1	20	25	14	32	11	17	10	41	4	11	23	21	26	18	17	28	6	10	49.048	0.566	0	0	0	0	0	0	381	0	0	0	0	0	0	0
MDH3_b2210	156	0.0220683	0.970293	0	91	117	195	146	0.588342	0.411658	0.621129	1647	549	55	0	25	35	19	41	8	21	32	51	18	24	24	31	26	40	30	45	10	13	43.4	0.641	0	0	0	0	0	0	548	0	0	0	0	0	0	202
FEOXAMtonex_b3006	291	0.0244404	0.964254	0	41	65	67	72	0.616327	0.408163	0.567347	735	245	33	1	9	12	11	21	3	16	8	28	6	12	4	14	14	15	9	22	3	3	44.038	0.658	0	0	0	0	0	0	244	8	11	0.315072	3.39e-07	9.61e-05	9.61e-05	261
GLUN_b1812	234	0.0671143	0.621225	0	88	133	113	120	0.610132	0.405286	0.513216	1362	454	38	6	29	31	21	25	12	25	13	47	8	15	23	30	28	31	26	27	7	11	48.366	0.611	0	0	0	0	0	0	453	1	11	0.250511	0	2.13e-05	2.13e-05	91
GLYCAtex_b0241	57	0.045701	0.726706	0	70	118	72	92	0.502841	0.372159	0.465909	1056	352	31	0	31	14	21	37	1	14	25	23	9	27	3	17	12	21	24	16	3	22	46.295	0.669	3	3	3	3	3	3	351	3	11	0.314667	0	4.27e-05	4.27e-05	261
SADT2_b2752	316	0.175312	1.67677	7	48	68	97	90	0.59736	0.376238	0.617162	909	303	19	2	17	25	13	20	9	20	17	26	12	12	14	12	26	14	12	15	7	10	40.574	0.703	0	0	0	0	0	0	302	168	10	0.375767	0.000641	0.00180367	0.00180367	91
BTNtex_b0241	57	0.045701	0.726706	0	70	118	72	92	0.502841	0.372159	0.465909	1056	352	31	0	31	14	21	37	1	14	25	23	9	27	3	17	12	21	24	16	3	22	46.295	0.669	3	3	3	3	3	3	351	8	11	0.315072	3.39e-07	9.61e-05	9.61e-05	261
MDDCP4pp_b3182	70	0.0407299	0.377247	0	76	130	134	138	0.587866	0.437238	0.569038	1434	478	54	5	27	11	19	37	7	28	18	44	14	21	24	31	26	32	27	33	4	15	52.627	0.56	0	0	0	0	0	0	477	11	10	0.314829	2.04e-06	0.000128	0.000128	306
BUTCT_b2222	252	0.0260336	0.771306	2	43	60	55	59	0.640553	0.442396	0.525346	651	217	26	5	14	10	6	24	6	12	7	22	11	7	9	7	12	5	12	18	2	1	47.054	0.572	0	0	0	0	0	0	216	0	0	0	0	0	0	0
CFAS160E_b1661	220	0.217931	1.34575	0	69	120	86	108	0.558747	0.373368	0.506527	1149	383	29	8	29	21	20	26	8	19	19	35	13	19	13	16	24	23	9	24	11	16	48.198	0.625	0	0	0	0	0	0	382	0	0	0	0	0	0	0
PERD_b2320	76	0.0373123	1.00856	1	69	111	115	84	0.654354	0.411609	0.525066	1137	379	37	6	27	22	13	31	10	17	20	50	3	10	19	8	25	16	19	33	3	9	48.921	0.59	0	0	0	0	0	0	378	336	9	0.424022	0.000798	0.00359666	0.00359666	91
PPA2_b2502	137	0.0566838	0.556349	0	107	136	152	119	0.622568	0.385214	0.527237	1542	514	41	4	20	42	21	35	17	29	21	64	17	18	22	29	38	26	24	29	8	8	50.17	0.581	1	1	1	1	1	1	513	0	0	0	0	0	0	279
F6Ptex_b1377	49	0.0274733	0.683685	1	68	140	60	110	0.550265	0.399471	0.449735	1134	378	42	0	37	12	19	43	5	9	17	27	9	33	5	14	11	21	24	17	5	27	40.354	0.74	3	3	3	3	3	3	377	0	0	0	0	0	0	0
PHEt2rpp_b0576	42	0.105239	0.9033	0	55	112	170	122	0.546841	0.392157	0.636166	1377	459	44	3	7	14	32	42	7	36	12	65	19	21	16	10	19	28	15	39	13	16	43.222	0.659	5	5	5	5	5	5	458	5	11	0.31491	0	6.4e-05	6.4e-05	261
CPGNabcpp_b0151	118	0.20204	0.686129	0	31	78	97	60	0.661654	0.454887	0.590226	798	266	27	2	10	16	6	24	10	14	7	35	9	4	17	10	18	17	12	17	3	7	40.624	0.625	2	2	2	2	2	2	265	8	11	0.315072	3.39e-07	9.61e-05	9.61e-05	261
PGPP161pp_b1278	82	0.0324914	0.618938	0	72	65	75	43	0.588235	0.466667	0.462745	765	255	29	2	3	15	11	15	6	16	10	32	5	3	13	11	18	10	15	21	17	2	55.788	0.485	0	0	0	0	0	0	254	2	11	0.238188	0	3.2e-05	3.2e-05	306
Htex_b0929	44	1.53858	2.15677	0	56	129	52	126	0.556474	0.385675	0.490358	1089	363	34	0	27	14	19	49	1	14	19	23	5	32	5	13	12	16	22	26	2	29	37.082	0.832	3	3	3	3	3	3	362	4	11	0.314748	0	5.34e-05	5.34e-05	261
G1Ptex_b0929	44	1.53858	2.15677	0	56	129	52	126	0.556474	0.385675	0.490358	1089	363	34	0	27	14	19	49	1	14	19	23	5	32	5	13	12	16	22	26	2	29	37.082	0.832	3	3	3	3	3	3	362	0	0	0	0	0	0	0
CHOLD_b0311	229	0.187101	0.748908	0	73	122	166	196	0.624776	0.438061	0.64991	1671	557	45	9	29	41	20	58	17	30	15	41	18	27	33	26	37	25	27	28	9	21	41.22	0.677	0	0	0	0	0	0	556	0	0	0	0	0	0	0
UDPGALtex_b1377	49	0.0274733	0.683685	1	68	140	60	110	0.550265	0.399471	0.449735	1134	378	42	0	37	12	19	43	5	9	17	27	9	33	5	14	11	21	24	17	5	27	40.354	0.74	3	3	3	3	3	3	377	0	0	0	0	0	0	0
MNLtex_b2215	64	0.0280042	1.90111	9	51	107	58	152	0.570652	0.377717	0.570652	1104	368	29	0	32	11	19	48	1	10	17	27	4	32	4	21	13	17	24	25	4	29	29.032	0.898	3	3	3	3	3	3	367	0	0	0	0	0	0	0
FACOAL80t2pp_b1805	265	0.429143	1.31904	0	95	148	182	137	0.6121	0.355872	0.567616	1686	562	38	4	29	34	20	43	12	24	32	65	15	27	34	24	26	23	27	59	4	21	47.219	0.627	0	0	0	0	0	0	561	0	0	0	0	0	0	0
PYDAMtex_b1377	49	0.0274733	0.683685	1	68	140	60	110	0.550265	0.399471	0.449735	1134	378	42	0	37	12	19	43	5	9	17	27	9	33	5	14	11	21	24	17	5	27	40.354	0.74	3	3	3	3	3	3	377	0	0	0	0	0	0	0
ARBtex_b0241	57	0.045701	0.726706	0	70	118	72	92	0.502841	0.372159	0.465909	1056	352	31	0	31	14	21	37	1	14	25	23	9	27	3	17	12	21	24	16	3	22	46.295	0.669	3	3	3	3	3	3	351	0	0	0	0	0	0	0
FBP_b3925	305	0.0627203	0.728409	0	56	70	90	121	0.652819	0.424332	0.626113	1011	337	39	3	25	21	4	37	4	28	15	32	14	14	11	7	24	11	16	25	1	5	40.074	0.705	1	1	1	1	1	1	336	0	0	0	0	0	0	111
OROTtex_b2215	64	0.0280042	1.90111	9	51	107	58	152	0.570652	0.377717	0.570652	1104	368	29	0	32	11	19	48	1	10	17	27	4	32	4	21	13	17	24	25	4	29	29.032	0.898	3	3	3	3	3	3	367	0	0	0	0	0	0	0
ASCBtex_b0241	57	0.045701	0.726706	0	70	118	72	92	0.502841	0.372159	0.465909	1056	352	31	0	31	14	21	37	1	14	25	23	9	27	3	17	12	21	24	16	3	22	46.295	0.669	3	3	3	3	3	3	351	0	0	0	0	0	0	0
DHPTDNRN_b0578	93	0.110934	0.827275	1	37	59	55	67	0.614679	0.37156	0.559633	654	218	27	1	17	13	11	11	7	7	18	19	5	8	8	7	7	13	11	20	3	4	40.709	0.728	0	0	0	0	0	0	217	0	0	0	0	0	0	0
NO3R2pp_b1226	106	0.0887793	1.64755	0	38	49	88	62	0.696203	0.362869	0.632911	711	237	31	1	19	19	8	11	8	10	8	35	4	4	9	18	13	11	8	10	2	7	39.442	0.696	1	1	1	1	1	1	236	0	0	0	0	0	0	0
TAURtex_b0241	57	0.045701	0.726706	0	70	118	72	92	0.502841	0.372159	0.465909	1056	352	31	0	31	14	21	37	1	14	25	23	9	27	3	17	12	21	24	16	3	22	46.295	0.669	3	3	3	3	3	3	351	0	0	0	0	0	0	0
GAMptspp_b1817	129	0.203139	1.45523	6	77	86	73	88	0.626543	0.385802	0.496914	972	324	37	0	20	23	7	22	4	19	25	25	10	14	17	7	14	9	22	39	4	5	44.127	0.68	0	0	0	0	0	0	323	0	0	0	0	0	0	0
SKMtex_b2215	64	0.0280042	1.90111	9	51	107	58	152	0.570652	0.377717	0.570652	1104	368	29	0	32	11	19	48	1	10	17	27	4	32	4	21	13	17	24	25	4	29	29.032	0.898	3	3	3	3	3	3	367	0	0	0	0	0	0	0
HXAtex_b1377	49	0.0274733	0.683685	1	68	140	60	110	0.550265	0.399471	0.449735	1134	378	42	0	37	12	19	43	5	9	17	27	9	33	5	14	11	21	24	17	5	27	40.354	0.74	3	3	3	3	3	3	377	3	11	0.315234	0.00165627	4.27e-05	4.27e-05	261
IMPtex_b0929	44	1.53858	2.15677	0	56	129	52	126	0.556474	0.385675	0.490358	1089	363	34	0	27	14	19	49	1	14	19	23	5	32	5	13	12	16	22	26	2	29	37.082	0.832	3	3	3	3	3	3	362	0	0	0	0	0	0	0
MDDCP1pp_b3182	70	0.0407299	0.377247	0	76	130	134	138	0.587866	0.437238	0.569038	1434	478	54	5	27	11	19	37	7	28	18	44	14	21	24	31	26	32	27	33	4	15	52.627	0.56	0	0	0	0	0	0	477	12	10	0.315072	2.25e-07	0.000139	0.000139	306
GSNtex_b0241	57	0.045701	0.726706	0	70	118	72	92	0.502841	0.372159	0.465909	1056	352	31	0	31	14	21	37	1	14	25	23	9	27	3	17	12	21	24	16	3	22	46.295	0.669	3	3	3	3	3	3	351	0	0	0	0	0	0	0
FE3HOXabcpp_b0153	61	0.0508808	1.02038	0	66	131	322	142	0.614221	0.476551	0.701967	1983	661	86	6	15	7	25	62	8	43	5	124	31	9	32	22	35	35	38	51	21	5	45.58	0.574	3	3	3	3	3	2	660	8	11	0.315072	3.39e-07	9.61e-05	9.61e-05	261
LYSDC_b0186	54	0.101134	0.667455	0	116	183	225	190	0.567227	0.378151	0.581232	2142	714	50	7	43	47	33	50	23	46	32	68	29	25	40	28	32	36	43	42	12	27	49.191	0.596	1	1	1	1	1	1	713	6	11	0.315396	0.000255	7.47e-05	7.47e-05	261
TSULabcpp_b2425	85	0.298743	1.753	7	54	57	115	113	0.566372	0.374631	0.672566	1017	339	31	0	21	17	16	24	5	12	28	33	5	23	14	17	11	19	20	24	7	11	37.714	0.735	1	1	1	1	1	1	338	0	0	0	0	0	0	0
HACD5_b3846	59	0.0262198	1.63496	4	132	143	208	247	0.643836	0.389041	0.623288	2190	730	82	5	44	50	30	62	11	37	54	74	21	24	40	24	31	26	30	58	8	18	39.202	0.724	1	1	1	1	1	1	729	3	1	1	0	4.27e-05	4.27e-05	174
ACGAptspp_b2415	225	0.0245069	1.24341	4	18	22	22	24	0.593023	0.395349	0.534884	258	86	9	0	1	9	4	6	2	3	7	8	2	2	2	6	1	6	10	7	0	0	38.988	0.805	1	1	1	0	0	0	85	0	0	0	0	0	0	0
MALt2_3pp_b4138	114	0.173468	0.969618	0	56	112	121	145	0.559908	0.40553	0.612903	1302	434	47	5	11	12	22	35	5	43	16	56	15	13	19	8	8	30	28	47	4	9	37.626	0.749	1	1	1	1	1	1	433	1	13	0.193615	0	2.13e-05	2.13e-05	261
SERt4pp_b3089	91	0.434645	1.05399	0	49	103	140	123	0.583133	0.438554	0.633735	1245	415	49	8	11	7	18	33	5	28	9	66	13	20	17	8	14	32	24	42	5	5	44.453	0.67	0	0	0	0	0	0	414	1	13	0.19337	0	2.13e-05	2.13e-05	261
FACOAL161t2pp_b1805	265	0.429143	1.31904	0	95	148	182	137	0.6121	0.355872	0.567616	1686	562	38	4	29	34	20	43	12	24	32	65	15	27	34	24	26	23	27	59	4	21	47.219	0.627	0	0	0	0	0	0	561	17	9	0.219259	0.00926342	0.000192	0.000192	198
NADH18pp_b2276	201	0.182983	0.815464	0	45	99	185	157	0.604938	0.407407	0.703704	1458	486	55	1	11	9	25	45	7	30	8	87	19	13	21	11	14	37	16	46	9	21	42.571	0.671	0	0	0	0	0	0	485	1	15	0.140369	0	2.13e-05	2.13e-05	261
ADOCBLtonex_b3966	75	0.388639	0.749811	0	88	211	146	170	0.549593	0.443902	0.513821	1845	615	41	1	49	18	18	63	11	25	21	45	3	28	18	34	31	48	56	41	14	49	48.859	0.611	2	1	1	1	0	0	614	0	0	0	0	0	0	0
23CAMPtex_b0929	44	1.53858	2.15677	0	56	129	52	126	0.556474	0.385675	0.490358	1089	363	34	0	27	14	19	49	1	14	19	23	5	32	5	13	12	16	22	26	2	29	37.082	0.832	3	3	3	3	3	3	362	0	0	0	0	0	0	0
METSOX2tex_b0241	57	0.045701	0.726706	0	70	118	72	92	0.502841	0.372159	0.465909	1056	352	31	0	31	14	21	37	1	14	25	23	9	27	3	17	12	21	24	16	3	22	46.295	0.669	3	3	3	3	3	3	351	0	0	0	0	0	0	0
TTRCYCtpp_b3035	76	0.232213	0.78678	0	80	129	139	146	0.554656	0.408907	0.576923	1482	494	57	0	25	20	10	24	3	21	18	53	6	43	17	44	22	44	36	28	1	21	45.516	0.658	0	0	0	0	0	0	493	1	1	1	0	2.13e-05	2.13e-05	326
PYDAMtex_b0241	57	0.045701	0.726706	0	70	118	72	92	0.502841	0.372159	0.465909	1056	352	31	0	31	14	21	37	1	14	25	23	9	27	3	17	12	21	24	16	3	22	46.295	0.669	3	3	3	3	3	3	351	0	0	0	0	0	0	0
CRNt2rpp_b4111	86	0.0516556	0.801316	0	64	149	166	122	0.550898	0.387226	0.57485	1503	501	47	4	22	18	29	43	9	48	20	60	19	11	23	14	19	26	25	39	7	17	43.98	0.634	0	0	0	0	0	0	500	2	1	1	6.79e-07	3.2e-05	3.2e-05	73
FE3HOXtonex_b3005	218	0.0344865	0.980261	0	22	26	56	38	0.521127	0.323944	0.661972	426	142	12	0	12	8	5	6	3	8	10	14	9	8	8	2	2	4	14	13	0	3	44.707	0.653	0	0	0	0	0	0	141	8	11	0.315072	3.39e-07	9.61e-05	9.61e-05	261
FRUtex_b0241	57	0.045701	0.726706	0	70	118	72	92	0.502841	0.372159	0.465909	1056	352	31	0	31	14	21	37	1	14	25	23	9	27	3	17	12	21	24	16	3	22	46.295	0.669	3	3	3	3	3	3	351	0	0	0	0	0	0	0
PETNT161pp_b3546	73	0.325611	1.05312	0	78	161	170	155	0.544326	0.391844	0.576241	1692	564	47	7	28	24	25	35	11	35	25	55	18	30	22	25	34	37	27	40	12	26	44.102	0.654	0	0	0	0	0	0	563	38	9	0.350701	0.00366989	0.000416	0.000416	306
G3PT_b0822	31	0.0348299	0.45942	0	53	78	66	75	0.573529	0.308824	0.518382	816	272	23	1	18	15	15	17	8	18	19	27	8	17	10	13	9	15	7	20	1	10	53.66	0.624	0	0	0	0	0	0	271	0	0	0	0	0	0	130
GALabcpp_b2149	119	0.0199856	1.12891	0	110	142	136	119	0.504931	0.353057	0.502959	1521	507	24	3	26	34	15	42	12	50	34	52	20	25	14	19	26	36	30	30	4	10	49.392	0.566	6	6	5	5	5	5	506	0	0	0	0	0	0	0
TMAOR2pp_b0997	31	0.26116	0.866219	8	120	199	293	237	0.612485	0.42285	0.624264	2547	849	74	10	45	47	33	76	28	46	36	65	19	37	44	48	48	44	42	59	20	27	43.369	0.664	3	2	2	2	2	2	848	0	0	0	0	0	0	0
TMAtex_b2215	64	0.0280042	1.90111	9	51	107	58	152	0.570652	0.377717	0.570652	1104	368	29	0	32	11	19	48	1	10	17	27	4	32	4	21	13	17	24	25	4	29	29.032	0.898	3	3	3	3	3	3	367	0	0	0	0	0	0	0
I2FE2SS2_b3807	97	0.133905	0.576409	0	16	21	29	41	0.598131	0.364486	0.654206	321	107	5	2	12	10	5	9	3	8	3	10	1	4	1	7	5	5	7	3	5	1	35.389	0.785	0	0	0	0	0	0	106	272	9	0.411212	0.000783	0.00291362	0.00291362	91
GLCptspp_b1817	129	0.203139	1.45523	6	77	86	73	88	0.626543	0.385802	0.496914	972	324	37	0	20	23	7	22	4	19	25	25	10	14	17	7	14	9	22	39	4	5	44.127	0.68	0	0	0	0	0	0	323	2	10	0.311546	1.05e-06	3.2e-05	3.2e-05	302
SUCDi_b0721	100	0.218505	1.58176	1	24	33	28	45	0.538462	0.376923	0.561538	390	130	10	0	2	5	9	10	3	13	5	15	6	2	3	3	6	10	7	15	3	2	45.513	0.563	0	0	0	0	0	0	129	1	10	0.295894	0	2.13e-05	2.13e-05	302
3NTD7pp_b4213	95	0.0121502	0.840414	0	112	183	179	174	0.567901	0.371914	0.544753	1944	648	73	2	54	27	22	45	11	36	50	47	16	41	31	21	18	32	33	52	7	29	44.263	0.649	0	0	0	0	0	0	647	0	0	0	0	0	0	0
FCLPA_b2738	75	0.0964359	0.778017	0	42	51	71	49	0.605634	0.43662	0.56338	639	213	21	4	10	14	7	15	4	7	7	29	5	11	12	7	13	17	9	12	2	6	50.889	0.557	0	0	0	0	0	0	212	0	0	0	0	0	0	0
DMSOR1_b0896	49	0.178473	0.890793	0	45	65	108	70	0.583333	0.4375	0.618056	864	288	31	3	4	5	14	31	4	18	4	46	18	4	11	8	9	21	9	30	11	6	47.117	0.599	1	1	1	1	1	1	287	0	0	0	0	0	0	0
NMNtex_b0241	57	0.045701	0.726706	0	70	118	72	92	0.502841	0.372159	0.465909	1056	352	31	0	31	14	21	37	1	14	25	23	9	27	3	17	12	21	24	16	3	22	46.295	0.669	3	3	3	3	3	3	351	0	0	0	0	0	0	0
DIMPtex_b2215	64	0.0280042	1.90111	9	51	107	58	152	0.570652	0.377717	0.570652	1104	368	29	0	32	11	19	48	1	10	17	27	4	32	4	21	13	17	24	25	4	29	29.032	0.898	3	3	3	3	3	3	367	0	0	0	0	0	0	0
VALt2rpp_b2682	49	0.0245516	0.670777	0	45	71	61	69	0.54878	0.50813	0.528455	738	246	35	5	4	7	18	20	1	16	5	28	8	4	12	9	9	24	12	17	7	4	46.825	0.58	0	0	0	0	0	0	245	3	12	0.239679	0.000831	4.27e-05	4.27e-05	261
NTD11pp_b4055	74	0.14684	0.511661	0	47	74	53	64	0.542017	0.44958	0.491597	714	238	23	1	14	11	13	15	3	16	12	14	5	15	16	8	13	20	13	16	5	4	52.306	0.599	0	0	0	0	0	0	237	0	0	0	0	0	0	0
RIBtex_b1377	49	0.0274733	0.683685	1	68	140	60	110	0.550265	0.399471	0.449735	1134	378	42	0	37	12	19	43	5	9	17	27	9	33	5	14	11	21	24	17	5	27	40.354	0.74	3	3	3	3	3	3	377	0	0	0	0	0	0	0
GPDDA5_b3449	105	0.110683	0.785986	0	38	49	90	71	0.612903	0.431452	0.649194	744	248	25	4	15	16	5	21	6	12	13	32	8	10	13	7	15	10	11	12	8	4	45.732	0.606	0	0	0	0	0	0	247	0	0	0	0	0	0	0
NO2t2rpp_b1223	121	0.43799	1.12253	0	62	122	151	129	0.534483	0.471983	0.603448	1392	464	53	5	12	7	45	48	3	31	14	51	16	10	20	16	17	40	25	32	11	7	46.631	0.659	1	1	1	1	1	1	463	0	0	0	0	0	0	0
GMPtex_b0241	57	0.045701	0.726706	0	70	118	72	92	0.502841	0.372159	0.465909	1056	352	31	0	31	14	21	37	1	14	25	23	9	27	3	17	12	21	24	16	3	22	46.295	0.669	3	3	3	3	3	3	351	0	0	0	0	0	0	0
DHQTi_b1693	89	0.339093	0.603975	1	51	66	67	69	0.588933	0.387352	0.537549	759	253	34	0	18	17	8	11	6	19	16	22	11	4	8	8	10	17	17	20	1	5	46.567	0.668	0	0	0	0	0	0	252	169	10	0.375421	0.000169	0.00181434	0.00181434	91
TREptspp_b2415	225	0.0245069	1.24341	4	18	22	22	24	0.593023	0.395349	0.534884	258	86	9	0	1	9	4	6	2	3	7	8	2	2	2	6	1	6	10	7	0	0	38.988	0.805	1	1	1	0	0	0	85	0	0	0	0	0	0	0
N2Otex_b2215	64	0.0280042	1.90111	9	51	107	58	152	0.570652	0.377717	0.570652	1104	368	29	0	32	11	19	48	1	10	17	27	4	32	4	21	13	17	24	25	4	29	29.032	0.898	3	3	3	3	3	3	367	0	0	0	0	0	0	0
CDAPPA140_b3918	68	0.177121	0.562483	0	51	79	77	45	0.575397	0.400794	0.484127	756	252	18	4	9	16	7	14	6	12	9	31	8	15	16	14	19	15	11	16	4	7	47.779	0.536	0	0	0	0	0	0	251	1	14	0.108196	0	2.13e-05	2.13e-05	197
GLYBabcpp_b2130	98	0.126125	0.74048	0	45	89	168	84	0.629534	0.440415	0.65285	1158	386	52	5	10	3	17	32	5	26	6	76	8	8	18	15	16	18	17	36	11	6	45.916	0.573	0	0	0	0	0	0	385	0	0	0	0	0	0	0
ACGAtex_b0929	44	1.53858	2.15677	0	56	129	52	126	0.556474	0.385675	0.490358	1089	363	34	0	27	14	19	49	1	14	19	23	5	32	5	13	12	16	22	26	2	29	37.082	0.832	3	3	3	3	3	3	362	0	0	0	0	0	0	0
HXAtex_b0929	44	1.53858	2.15677	0	56	129	52	126	0.556474	0.385675	0.490358	1089	363	34	0	27	14	19	49	1	14	19	23	5	32	5	13	12	16	22	26	2	29	37.082	0.832	3	3	3	3	3	3	362	3	11	0.315234	0.00165627	4.27e-05	4.27e-05	261
CINNDO_b2538	65	0.0917986	0.757022	0	75	132	95	152	0.605727	0.438326	0.544053	1362	454	39	10	32	29	20	41	10	19	19	35	7	18	19	23	28	24	22	25	15	18	46.535	0.648	0	0	0	0	0	0	453	0	0	0	0	0	0	0
NH4tex_b1377	49	0.0274733	0.683685	1	68	140	60	110	0.550265	0.399471	0.449735	1134	378	42	0	37	12	19	43	5	9	17	27	9	33	5	14	11	21	24	17	5	27	40.354	0.74	3	3	3	3	3	3	377	221	10	0.341416	0.00174683	0.00236931	0.00236931	261
I2FE2SS_b3807	97	0.133905	0.576409	0	16	21	29	41	0.598131	0.364486	0.654206	321	107	5	2	12	10	5	9	3	8	3	10	1	4	1	7	5	5	7	3	5	1	35.389	0.785	0	0	0	0	0	0	106	270	9	0.410936	0.000783	0.00289227	0.00289227	91
FE3tex_b0929	44	1.53858	2.15677	0	56	129	52	126	0.556474	0.385675	0.490358	1089	363	34	0	27	14	19	49	1	14	19	23	5	32	5	13	12	16	22	26	2	29	37.082	0.832	3	3	3	3	3	3	362	0	0	0	0	0	0	118
GALKr_b2045	43	0.00273255	0.969548	1	62	94	115	156	0.622951	0.372365	0.63466	1281	427	38	5	26	18	16	30	16	25	16	48	16	17	12	24	25	24	21	35	3	11	42.355	0.636	0	0	0	0	0	0	426	0	0	0	0	0	0	0
3OAS140_b1095	516	0.380007	1.03912	5	69	128	98	119	0.599034	0.475845	0.524155	1242	414	52	4	20	22	14	52	10	28	17	29	13	16	15	10	17	32	23	27	2	10	43.833	0.715	1	1	1	1	1	1	413	184	10	0.381145	0.000738	0.00197443	0.00197443	306
CYTBDpp_b0979	31	0.29588	1.1237	0	53	77	139	110	0.530343	0.408971	0.656992	1137	379	27	5	11	8	28	33	2	24	6	64	16	10	20	9	17	21	15	34	17	11	46.852	0.569	1	1	1	1	1	1	378	3	11	0.24081	0	4.27e-05	4.27e-05	261
MANGLYCptspp_b2416	315	0.342568	1.34241	0	114	167	148	147	0.619792	0.357639	0.512153	1728	576	63	4	39	60	18	36	8	51	35	58	18	17	15	21	31	26	29	35	2	9	43.52	0.718	0	0	0	0	0	0	575	0	0	0	0	0	0	0
OCDCAtexi_b2344	76	0.186239	1.56634	0	71	150	93	133	0.519016	0.469799	0.505593	1341	447	50	0	25	13	25	45	5	21	14	31	7	33	16	22	15	39	32	18	12	23	45.305	0.702	0	0	0	0	0	0	446	0	0	0	0	0	0	0
ADEtex_b0929	44	1.53858	2.15677	0	56	129	52	126	0.556474	0.385675	0.490358	1089	363	34	0	27	14	19	49	1	14	19	23	5	32	5	13	12	16	22	26	2	29	37.082	0.832	3	3	3	3	3	3	362	3	11	0.314667	0	4.27e-05	4.27e-05	261
AMALT1_b3416	90	0.0488311	0.657184	0	110	156	263	166	0.61295	0.42446	0.617266	2085	695	68	11	43	41	16	48	17	22	36	74	22	21	38	35	40	35	33	40	22	32	44.234	0.619	0	0	0	0	0	0	694	0	0	0	0	0	0	0
FRUptspp_b2415	225	0.0245069	1.24341	4	18	22	22	24	0.593023	0.395349	0.534884	258	86	9	0	1	9	4	6	2	3	7	8	2	2	2	6	1	6	10	7	0	0	38.988	0.805	1	1	1	0	0	0	85	0	0	0	0	0	0	0
THMtex_b2215	64	0.0280042	1.90111	9	51	107	58	152	0.570652	0.377717	0.570652	1104	368	29	0	32	11	19	48	1	10	17	27	4	32	4	21	13	17	24	25	4	29	29.032	0.898	3	3	3	3	3	3	367	0	0	0	0	0	0	0
SUCptspp_b2417	184	0.0130152	0.802811	0	32	47	35	56	0.564706	0.317647	0.535294	510	170	7	0	13	17	8	16	2	19	17	12	3	4	7	1	3	10	11	19	0	0	38.877	0.793	2	2	2	2	2	1	169	0	0	0	0	0	0	0
LPLIPAL1E180pp_b0494	210	0.032285	0.623363	0	31	51	67	60	0.593301	0.382775	0.607656	627	209	22	0	12	7	11	10	4	7	8	29	7	11	14	17	11	11	6	10	6	5	46.887	0.587	0	0	0	0	0	0	208	3	9	0.215101	0.000594	4.27e-05	4.27e-05	198
CBPS_b0033	627	0.70248	1.65345	1	163	212	335	364	0.635009	0.402235	0.650838	3222	1074	112	14	64	91	34	83	15	71	56	83	31	36	44	35	69	46	60	94	4	31	35.578	0.772	0	0	0	0	0	0	1073	2	11	0.259314	1.96e-07	3.2e-05	3.2e-05	198
GGGABADr_b1300	151	0.493128	1.08804	1	82	94	142	178	0.622984	0.451613	0.645161	1488	496	67	4	29	30	17	40	12	26	23	54	8	20	20	17	26	32	25	28	9	8	38.983	0.66	5	5	5	5	5	5	495	3	1	1	0	4.27e-05	4.27e-05	137
CPGNabcpp_b0152	51	0.00137629	0.771041	0	51	67	100	79	0.59596	0.441077	0.602694	891	297	32	1	17	13	13	18	5	13	8	39	14	11	22	8	19	17	13	18	8	7	45.741	0.583	0	0	0	0	0	0	296	8	11	0.315072	3.39e-07	9.61e-05	9.61e-05	261
2AGPEAT120_b2836	53	0.183582	0.630585	1	136	179	211	194	0.611111	0.405556	0.5625	2160	720	55	4	30	45	36	55	16	39	38	78	23	13	41	27	51	33	44	61	8	22	47.712	0.603	0	0	0	0	0	0	719	4	12	0.138496	1.07e-05	5.34e-05	5.34e-05	198
PLIPA2A120pp_b3821	101	0.0282509	0.656571	0	38	73	92	87	0.524138	0.396552	0.617241	870	290	18	0	16	15	10	23	5	9	10	29	8	20	13	12	13	19	18	18	10	23	46.721	0.641	0	0	0	0	0	0	289	2	12	0.138277	0	3.2e-05	3.2e-05	198
CD2tpp_b3040	69	0.108139	0.729887	0	53	59	87	59	0.589147	0.437984	0.565891	774	258	34	1	4	8	11	30	4	21	6	42	15	7	15	5	4	18	9	17	2	4	45.75	0.495	0	0	0	0	0	0	257	2	1	1	6.79e-07	3.2e-05	3.2e-05	62
HIStex_b2215	64	0.0280042	1.90111	9	51	107	58	152	0.570652	0.377717	0.570652	1104	368	29	0	32	11	19	48	1	10	17	27	4	32	4	21	13	17	24	25	4	29	29.032	0.898	3	3	3	3	3	3	367	3	11	0.31491	0.000829	4.27e-05	4.27e-05	261
MMM_b2917	332	0.030382	0.657032	4	116	167	180	252	0.625175	0.41958	0.604196	2145	715	88	7	47	44	21	49	14	50	26	60	18	27	29	35	39	42	40	50	6	22	44.492	0.669	0	0	0	0	0	0	714	1	1	1	0	2.13e-05	2.13e-05	218
S4FE4ST_b1681	47	0.201335	0.975905	1	80	94	137	113	0.620283	0.389151	0.589623	1272	424	44	3	21	25	15	29	23	21	15	49	6	24	13	29	24	23	25	24	3	7	43.261	0.61	0	0	0	0	0	0	423	272	9	0.398115	0.000782	0.00291362	0.00291362	91
PYDXK_b2418	27	0.5487	0.654483	0	44	73	92	75	0.591549	0.387324	0.588028	852	284	27	2	19	13	6	18	5	17	12	37	5	10	12	14	12	20	16	26	3	9	49.587	0.56	0	0	0	0	0	0	283	1	1	1	0	2.13e-05	2.13e-05	294
GALCTNtex_b0241	57	0.045701	0.726706	0	70	118	72	92	0.502841	0.372159	0.465909	1056	352	31	0	31	14	21	37	1	14	25	23	9	27	3	17	12	21	24	16	3	22	46.295	0.669	3	3	3	3	3	3	351	0	0	0	0	0	0	0
HPPPNtex_b2215	64	0.0280042	1.90111	9	51	107	58	152	0.570652	0.377717	0.570652	1104	368	29	0	32	11	19	48	1	10	17	27	4	32	4	21	13	17	24	25	4	29	29.032	0.898	3	3	3	3	3	3	367	0	0	0	0	0	0	0
MEOHtex_b0929	44	1.53858	2.15677	0	56	129	52	126	0.556474	0.385675	0.490358	1089	363	34	0	27	14	19	49	1	14	19	23	5	32	5	13	12	16	22	26	2	29	37.082	0.832	3	3	3	3	3	3	362	303	9	0.420096	0.00129598	0.00324447	0.00324447	91
HISt2rpp_b0112	54	0.485507	1.29082	4	70	100	150	138	0.561135	0.39083	0.628821	1374	458	52	4	5	16	29	42	7	38	15	54	20	18	17	15	10	24	18	46	12	15	39.487	0.692	6	6	6	6	6	6	457	3	12	0.239679	0.000831	4.27e-05	4.27e-05	261
TTRCYCtpp_b2470	115	0.163002	1.06518	1	148	234	351	305	0.593449	0.408478	0.631985	3114	1038	107	4	47	47	50	81	11	56	35	110	40	42	43	55	47	67	64	90	11	30	46.359	0.628	2	2	2	2	2	2	1037	1	1	1	0	2.13e-05	2.13e-05	326
HYXNtex_b0241	57	0.045701	0.726706	0	70	118	72	92	0.502841	0.372159	0.465909	1056	352	31	0	31	14	21	37	1	14	25	23	9	27	3	17	12	21	24	16	3	22	46.295	0.669	3	3	3	3	3	3	351	3	11	0.314667	0	4.27e-05	4.27e-05	261
FRUtex_b0929	44	1.53858	2.15677	0	56	129	52	126	0.556474	0.385675	0.490358	1089	363	34	0	27	14	19	49	1	14	19	23	5	32	5	13	12	16	22	26	2	29	37.082	0.832	3	3	3	3	3	3	362	0	0	0	0	0	0	0
GLCNtex_b2215	64	0.0280042	1.90111	9	51	107	58	152	0.570652	0.377717	0.570652	1104	368	29	0	32	11	19	48	1	10	17	27	4	32	4	21	13	17	24	25	4	29	29.032	0.898	3	3	3	3	3	3	367	6	11	0.315234	0.000578	7.47e-05	7.47e-05	261
PAPA181pp_b1278	82	0.0324914	0.618938	0	72	65	75	43	0.588235	0.466667	0.462745	765	255	29	2	3	15	11	15	6	16	10	32	5	3	13	11	18	10	15	21	17	2	55.788	0.485	0	0	0	0	0	0	254	2	11	0.206403	0	3.2e-05	3.2e-05	306
23CUMPtex_b0241	57	0.045701	0.726706	0	70	118	72	92	0.502841	0.372159	0.465909	1056	352	31	0	31	14	21	37	1	14	25	23	9	27	3	17	12	21	24	16	3	22	46.295	0.669	3	3	3	3	3	3	351	0	0	0	0	0	0	0
HPPPNtex_b1377	49	0.0274733	0.683685	1	68	140	60	110	0.550265	0.399471	0.449735	1134	378	42	0	37	12	19	43	5	9	17	27	9	33	5	14	11	21	24	17	5	27	40.354	0.74	3	3	3	3	3	3	377	0	0	0	0	0	0	0
2AGPGAT160_b2836	53	0.183582	0.630585	1	136	179	211	194	0.611111	0.405556	0.5625	2160	720	55	4	30	45	36	55	16	39	38	78	23	13	41	27	51	33	44	61	8	22	47.712	0.603	0	0	0	0	0	0	719	3	10	0.179962	0	4.27e-05	4.27e-05	198
SUCRtex_b0929	44	1.53858	2.15677	0	56	129	52	126	0.556474	0.385675	0.490358	1089	363	34	0	27	14	19	49	1	14	19	23	5	32	5	13	12	16	22	26	2	29	37.082	0.832	3	3	3	3	3	3	362	0	0	0	0	0	0	0
PLIPA2G120pp_b3821	101	0.0282509	0.656571	0	38	73	92	87	0.524138	0.396552	0.617241	870	290	18	0	16	15	10	23	5	9	10	29	8	20	13	12	13	19	18	18	10	23	46.721	0.641	0	0	0	0	0	0	289	2	12	0.138277	0	3.2e-05	3.2e-05	198
CD2tex_b1377	49	0.0274733	0.683685	1	68	140	60	110	0.550265	0.399471	0.449735	1134	378	42	0	37	12	19	43	5	9	17	27	9	33	5	14	11	21	24	17	5	27	40.354	0.74	3	3	3	3	3	3	377	0	0	0	0	0	0	0
FACOAE180_b0452	204	0.111435	0.81707	0	49	82	83	73	0.637631	0.393728	0.543554	861	287	22	1	12	19	16	21	12	12	10	31	5	11	20	16	16	20	10	21	3	8	48.274	0.628	0	0	0	0	0	0	286	1	9	0.214573	0	2.13e-05	2.13e-05	198
OROTt2_2pp_b3528	176	0.0628768	1.03015	0	59	107	130	133	0.564103	0.37296	0.613054	1287	429	44	4	14	12	25	42	6	47	21	52	15	11	11	13	10	26	22	43	1	9	41.963	0.64	1	1	1	1	1	1	428	0	0	0	0	0	0	0
ACMANAptspp_b1818	96	0.198948	1.09694	5	32	89	68	78	0.599251	0.400749	0.546816	801	267	40	2	8	6	10	25	4	32	3	27	13	14	8	9	5	10	15	28	2	5	38.328	0.759	0	0	0	0	0	0	266	0	0	0	0	0	0	0
BMOGDS2_b3856	184	0.18223	0.79815	0	44	48	55	29	0.619318	0.363636	0.477273	528	176	18	1	15	12	5	12	6	11	12	22	6	3	7	6	8	6	9	12	3	1	54.16	0.485	0	0	0	0	0	0	175	336	9	0.424022	0.000798	0.00359666	0.00359666	91
3OAS181_b1095	516	0.380007	1.03912	5	69	128	98	119	0.599034	0.475845	0.524155	1242	414	52	4	20	22	14	52	10	28	17	29	13	16	15	10	17	32	23	27	2	10	43.833	0.715	1	1	1	1	1	1	413	6	11	0.31901	1.01e-05	7.47e-05	7.47e-05	198
UMPtex_b0241	57	0.045701	0.726706	0	70	118	72	92	0.502841	0.372159	0.465909	1056	352	31	0	31	14	21	37	1	14	25	23	9	27	3	17	12	21	24	16	3	22	46.295	0.669	3	3	3	3	3	3	351	0	0	0	0	0	0	0
G1PPpp_b1002	41	0.00780505	0.943563	0	79	93	135	107	0.577295	0.386473	0.584541	1242	414	38	6	24	22	13	25	7	14	27	38	12	18	24	30	11	27	23	32	6	16	45.208	0.642	0	0	0	0	0	0	413	0	0	0	0	0	0	0
CRNCBCT_b0038	32	0.341497	1.90033	3	73	86	100	147	0.571429	0.399015	0.608374	1218	406	37	7	18	32	17	36	9	29	20	33	17	16	24	16	15	14	22	19	7	17	41.852	0.702	0	0	0	0	0	0	405	0	0	0	0	0	0	0
HOMtex_b2215	64	0.0280042	1.90111	9	51	107	58	152	0.570652	0.377717	0.570652	1104	368	29	0	32	11	19	48	1	10	17	27	4	32	4	21	13	17	24	25	4	29	29.032	0.898	3	3	3	3	3	3	367	4	11	0.315153	1.22e-06	5.34e-05	5.34e-05	261
CLPNS161pp_b0789	74	0.216763	0.648401	0	74	93	128	119	0.649758	0.386473	0.596618	1242	414	37	2	22	30	17	26	15	22	16	42	9	18	21	19	38	12	14	30	9	14	45.21	0.594	0	0	0	0	0	0	413	27	10	0.30872	0.000831	0.000299	0.000299	306
SO2tex_b0241	57	0.045701	0.726706	0	70	118	72	92	0.502841	0.372159	0.465909	1056	352	31	0	31	14	21	37	1	14	25	23	9	27	3	17	12	21	24	16	3	22	46.295	0.669	3	3	3	3	3	3	351	0	0	0	0	0	0	0
NADH18pp_b2284	453	0.0419157	1.10729	0	74	90	142	140	0.605381	0.44843	0.632287	1338	446	38	9	17	38	19	48	7	22	25	48	12	20	25	10	28	19	23	16	10	11	40.823	0.72	0	0	0	0	0	0	445	1	15	0.140369	0	2.13e-05	2.13e-05	261
12PPDRtex_b0241	57	0.045701	0.726706	0	70	118	72	92	0.502841	0.372159	0.465909	1056	352	31	0	31	14	21	37	1	14	25	23	9	27	3	17	12	21	24	16	3	22	46.295	0.669	3	3	3	3	3	3	351	7	11	0.314991	6.79e-07	8.54e-05	8.54e-05	261
HACD6_b3846	59	0.0262198	1.63496	4	132	143	208	247	0.643836	0.389041	0.623288	2190	730	82	5	44	50	30	62	11	37	54	74	21	24	40	24	31	26	30	58	8	18	39.202	0.724	1	1	1	1	1	1	729	2	1	1	0	3.2e-05	3.2e-05	95
UDPGLCURtex_b0929	44	1.53858	2.15677	0	56	129	52	126	0.556474	0.385675	0.490358	1089	363	34	0	27	14	19	49	1	14	19	23	5	32	5	13	12	16	22	26	2	29	37.082	0.832	3	3	3	3	3	3	362	0	0	0	0	0	0	0
ISETACabcpp_b0936	113	0.0495714	0.748716	1	70	81	81	88	0.609375	0.434375	0.528125	960	320	42	0	14	15	10	22	4	18	19	36	4	9	21	21	14	20	15	21	4	10	46.968	0.601	0	0	0	0	0	0	319	0	0	0	0	0	0	0
SHKK_b0388	111	0.0129638	0.707085	0	44	41	50	40	0.617143	0.434286	0.514286	525	175	18	3	6	17	5	10	2	12	2	17	4	8	8	9	12	8	14	15	2	2	53.995	0.52	0	0	0	0	0	0	174	169	10	0.375421	0.000169	0.00181434	0.00181434	91
UAG2E_b3786	281	0.0547671	0.966679	1	62	97	127	91	0.612732	0.387268	0.578249	1131	377	28	4	21	26	12	21	13	24	15	41	9	15	22	14	24	15	27	32	4	9	50.053	0.584	0	0	0	0	0	0	376	45	11	0.325452	0.000102	0.000491	0.000491	306
G3PEabcpp_b3451	113	0.301202	1.14633	2	26	48	113	95	0.510638	0.382979	0.737589	846	282	25	1	8	9	23	14	3	25	5	37	16	11	15	5	10	12	23	26	8	5	41.782	0.626	2	0	0	0	0	0	281	1	10	0.187452	0	2.13e-05	2.13e-05	198
LYSabcpp_b2306	76	0.0725659	0.641647	0	58	49	91	60	0.631783	0.341085	0.585271	774	258	15	1	8	22	9	21	9	13	16	30	8	10	9	17	15	17	9	24	1	3	48.831	0.57	7	7	7	7	6	5	257	1	13	0.194506	0	2.13e-05	2.13e-05	261
FUMtex_b0929	44	1.53858	2.15677	0	56	129	52	126	0.556474	0.385675	0.490358	1089	363	34	0	27	14	19	49	1	14	19	23	5	32	5	13	12	16	22	26	2	29	37.082	0.832	3	3	3	3	3	3	362	0	0	0	0	0	0	0
H2Stex_b0241	57	0.045701	0.726706	0	70	118	72	92	0.502841	0.372159	0.465909	1056	352	31	0	31	14	21	37	1	14	25	23	9	27	3	17	12	21	24	16	3	22	46.295	0.669	3	3	3	3	3	3	351	2	1	1	0	3.2e-05	3.2e-05	172
4PEPTabcpp_b1244	146	0.551909	1.06952	0	60	103	74	70	0.501629	0.400651	0.469055	921	307	31	1	8	6	18	24	5	31	12	41	14	9	18	4	13	18	14	24	3	12	46.979	0.539	2	2	2	2	2	2	306	1	13	0.197485	0	2.13e-05	2.13e-05	306
ALAALAabcpp_b3541	203	0.541581	1.00757	0	51	65	115	97	0.64939	0.405488	0.646341	984	328	34	6	19	19	7	23	9	20	13	35	12	10	20	18	21	17	11	24	0	9	42.578	0.645	11	11	11	11	10	10	327	1	10	0.306327	0	2.13e-05	2.13e-05	306
ETOHtex_b2215	64	0.0280042	1.90111	9	51	107	58	152	0.570652	0.377717	0.570652	1104	368	29	0	32	11	19	48	1	10	17	27	4	32	4	21	13	17	24	25	4	29	29.032	0.898	3	3	3	3	3	3	367	4	11	0.314748	0	5.34e-05	5.34e-05	261
DAPtex_b0241	57	0.045701	0.726706	0	70	118	72	92	0.502841	0.372159	0.465909	1056	352	31	0	31	14	21	37	1	14	25	23	9	27	3	17	12	21	24	16	3	22	46.295	0.669	3	3	3	3	3	3	351	6	11	0.315396	0.000255	7.47e-05	7.47e-05	261
NADH18pp_b2282	424	0.160003	1.02908	0	34	62	129	101	0.53681	0.383436	0.705521	978	326	30	3	8	10	30	26	4	26	8	41	16	9	15	12	10	19	12	28	10	8	37.474	0.708	0	0	0	0	0	0	325	1	15	0.140369	0	2.13e-05	2.13e-05	261
DOPAtex_b2215	64	0.0280042	1.90111	9	51	107	58	152	0.570652	0.377717	0.570652	1104	368	29	0	32	11	19	48	1	10	17	27	4	32	4	21	13	17	24	25	4	29	29.032	0.898	3	3	3	3	3	3	367	0	0	0	0	0	0	0
PPA_b2744	420	0.227363	0.722778	0	37	82	73	62	0.637795	0.472441	0.531496	762	254	24	5	21	6	5	25	7	14	5	23	4	11	17	9	15	14	17	23	3	5	42.933	0.589	0	0	0	0	0	0	253	2	3	0.571429	2.04e-06	3.2e-05	3.2e-05	126
SERD_L_b3708	133	0.0478405	1.30257	0	88	113	125	146	0.569915	0.381356	0.574153	1416	472	44	7	25	34	23	37	8	29	29	36	16	15	20	20	24	19	27	31	2	25	39.418	0.737	0	0	0	0	0	0	471	0	0	0	0	0	0	303
PLIPA2A160pp_b3821	101	0.0282509	0.656571	0	38	73	92	87	0.524138	0.396552	0.617241	870	290	18	0	16	15	10	23	5	9	10	29	8	20	13	12	13	19	18	18	10	23	46.721	0.641	0	0	0	0	0	0	289	2	10	0.179935	0	3.2e-05	3.2e-05	198
TYRTA_b0928	104	0.34765	0.988597	2	68	116	93	120	0.612091	0.418136	0.536524	1191	397	46	5	20	27	20	30	6	17	18	38	8	23	15	16	22	21	22	26	5	11	44.535	0.728	1	1	1	1	1	1	396	161	10	0.326232	0.000422	0.00172896	0.00172896	91
GLYCL_b2905	404	0.0507056	1.04014	0	54	98	104	109	0.632877	0.421918	0.583562	1095	365	38	2	20	26	16	34	9	19	13	30	14	12	14	15	22	13	25	27	5	10	43.344	0.692	0	0	0	0	0	0	364	1	10	0.295894	0	2.13e-05	2.13e-05	302
GAL1Ptex_b0929	44	1.53858	2.15677	0	56	129	52	126	0.556474	0.385675	0.490358	1089	363	34	0	27	14	19	49	1	14	19	23	5	32	5	13	12	16	22	26	2	29	37.082	0.832	3	3	3	3	3	3	362	0	0	0	0	0	0	0
3CMPtex_b1377	49	0.0274733	0.683685	1	68	140	60	110	0.550265	0.399471	0.449735	1134	378	42	0	37	12	19	43	5	9	17	27	9	33	5	14	11	21	24	17	5	27	40.354	0.74	3	3	3	3	3	3	377	0	0	0	0	0	0	0
EDTXS1_b1054	112	0.186439	0.593459	0	66	61	96	84	0.576547	0.42671	0.586319	921	307	18	5	11	17	11	24	6	13	18	33	18	7	22	10	26	10	14	22	12	9	48.074	0.622	1	1	1	1	1	1	306	62	10	0.31976	9.11e-05	0.000672	0.000672	306
MTRPOX_b1059	51	0.370224	0.589432	0	70	99	78	126	0.61126	0.41555	0.546917	1119	373	38	6	28	21	19	34	13	21	16	32	4	14	20	14	16	18	17	22	6	13	44.96	0.608	0	0	0	0	0	0	372	0	0	0	0	0	0	0
ACGAtex_b2215	64	0.0280042	1.90111	9	51	107	58	152	0.570652	0.377717	0.570652	1104	368	29	0	32	11	19	48	1	10	17	27	4	32	4	21	13	17	24	25	4	29	29.032	0.898	3	3	3	3	3	3	367	0	0	0	0	0	0	0
TKT1_b2465	130	0.158709	1.34743	4	109	163	222	174	0.621257	0.42515	0.592814	2004	668	76	4	33	49	23	63	26	36	38	57	16	25	35	23	27	31	35	36	12	22	46.154	0.644	1	1	1	1	1	1	667	0	0	0	0	0	0	318
UMPtex_b0929	44	1.53858	2.15677	0	56	129	52	126	0.556474	0.385675	0.490358	1089	363	34	0	27	14	19	49	1	14	19	23	5	32	5	13	12	16	22	26	2	29	37.082	0.832	3	3	3	3	3	3	362	0	0	0	0	0	0	0
FALDtex_b0929	44	1.53858	2.15677	0	56	129	52	126	0.556474	0.385675	0.490358	1089	363	34	0	27	14	19	49	1	14	19	23	5	32	5	13	12	16	22	26	2	29	37.082	0.832	3	3	3	3	3	3	362	0	0	0	0	0	0	0
NO3R1pp_b1224	125	0.172636	2.4336	1	167	286	379	416	0.58734	0.423878	0.637019	3744	1248	97	12	75	77	36	106	36	56	66	103	37	59	60	52	67	74	74	69	38	53	39.001	0.764	2	1	1	1	1	1	1247	0	0	0	0	0	0	0
LYSDC_b4131	53	0.112548	0.862099	0	119	212	175	210	0.527933	0.361732	0.537709	2148	716	46	7	38	50	34	44	24	49	43	64	30	37	36	15	30	40	49	38	7	34	37.247	0.79	2	2	2	2	2	2	715	6	11	0.315396	0.000255	7.47e-05	7.47e-05	261
NADH18pp_b2288	186	0.0406576	0.819621	0	23	38	39	48	0.547297	0.466216	0.587838	444	148	17	2	3	7	12	11	2	11	2	15	5	4	3	1	13	13	5	13	5	3	42.592	0.678	0	0	0	0	0	0	147	1	15	0.140369	0	2.13e-05	2.13e-05	261
MANtex_b0241	57	0.045701	0.726706	0	70	118	72	92	0.502841	0.372159	0.465909	1056	352	31	0	31	14	21	37	1	14	25	23	9	27	3	17	12	21	24	16	3	22	46.295	0.669	3	3	3	3	3	3	351	0	0	0	0	0	0	0
AMPTASECG_b4260	396	0.0252466	0.778094	0	77	118	162	147	0.619048	0.426587	0.613095	1512	504	48	9	19	38	12	49	10	27	24	50	16	23	20	21	32	29	24	34	4	14	43.386	0.665	1	1	1	1	1	1	503	2	13	0.194198	0	3.2e-05	3.2e-05	261
PYK_b1676	459	0.262518	0.774055	0	90	132	94	155	0.590234	0.377919	0.528662	1413	471	41	6	27	35	12	40	8	33	34	40	18	24	12	12	21	24	34	44	0	5	35.035	0.841	1	1	1	1	1	1	470	0	0	0	0	0	0	295
ILEtex_b1377	49	0.0274733	0.683685	1	68	140	60	110	0.550265	0.399471	0.449735	1134	378	42	0	37	12	19	43	5	9	17	27	9	33	5	14	11	21	24	17	5	27	40.354	0.74	3	3	3	3	3	3	377	17	11	0.317358	0.000844	0.000192	0.000192	261
H2Otex_b0241	57	0.045701	0.726706	0	70	118	72	92	0.502841	0.372159	0.465909	1056	352	31	0	31	14	21	37	1	14	25	23	9	27	3	17	12	21	24	16	3	22	46.295	0.669	3	3	3	3	3	3	351	1	1	1	0	2.13e-05	2.13e-05	170
GDPDPK_b2784	187	0.216635	0.665122	0	119	183	225	218	0.642953	0.375839	0.594631	2235	745	65	11	51	52	17	50	28	47	38	71	15	26	25	36	55	37	26	61	11	22	44.93	0.646	0	0	0	0	0	0	744	1	4	0.4	0	2.13e-05	2.13e-05	165
CUt3_b0573	67	0.383572	1.23527	0	23	29	27	32	0.504505	0.324324	0.531532	333	111	9	0	4	6	6	5	5	9	9	6	6	5	4	9	1	7	9	9	1	0	41.235	0.736	0	0	0	0	0	0	110	0	0	0	0	0	0	0
NOVBCNtpp_b2470	115	0.163002	1.06518	1	148	234	351	305	0.593449	0.408478	0.631985	3114	1038	107	4	47	47	50	81	11	56	35	110	40	42	43	55	47	67	64	90	11	30	46.359	0.628	2	2	2	2	2	2	1037	1	1	1	0	2.13e-05	2.13e-05	242
HISabcpp_b2309	43	0.424025	1.14531	1	60	64	64	73	0.559387	0.37931	0.524904	783	261	26	2	18	18	14	21	1	15	24	23	4	9	9	12	9	17	14	15	1	8	48.62	0.663	3	3	3	3	3	3	260	1	13	0.19337	0	2.13e-05	2.13e-05	261
CSNtex_b1377	49	0.0274733	0.683685	1	68	140	60	110	0.550265	0.399471	0.449735	1134	378	42	0	37	12	19	43	5	9	17	27	9	33	5	14	11	21	24	17	5	27	40.354	0.74	3	3	3	3	3	3	377	0	0	0	0	0	0	0
THMabcpp_b0067	63	0.234671	0.695178	0	65	98	222	152	0.623836	0.43203	0.696462	1611	537	60	10	17	12	26	33	4	29	7	103	16	10	28	28	34	27	22	41	17	12	42.452	0.586	0	0	0	0	0	0	536	0	0	0	0	0	0	0
RBP4E_b0061	51	0.0641173	0.720044	2	40	41	61	90	0.607759	0.400862	0.650862	696	232	21	2	12	15	6	19	11	12	11	16	7	7	11	11	8	10	18	21	4	9	42.936	0.671	2	2	2	2	2	2	231	0	0	0	0	0	0	0
PGPP140_b1278	82	0.0324914	0.618938	0	72	65	75	43	0.588235	0.466667	0.462745	765	255	29	2	3	15	11	15	6	16	10	32	5	3	13	11	18	10	15	21	17	2	55.788	0.485	0	0	0	0	0	0	254	2	14	0.108744	6.17e-05	3.2e-05	3.2e-05	197
DINStex_b2215	64	0.0280042	1.90111	9	51	107	58	152	0.570652	0.377717	0.570652	1104	368	29	0	32	11	19	48	1	10	17	27	4	32	4	21	13	17	24	25	4	29	29.032	0.898	3	3	3	3	3	3	367	0	0	0	0	0	0	0
23CGMPtex_b0241	57	0.045701	0.726706	0	70	118	72	92	0.502841	0.372159	0.465909	1056	352	31	0	31	14	21	37	1	14	25	23	9	27	3	17	12	21	24	16	3	22	46.295	0.669	3	3	3	3	3	3	351	0	0	0	0	0	0	0
AKGt2rpp_b2587	90	0.0709621	1.16265	0	96	130	115	92	0.526559	0.457275	0.47806	1299	433	51	7	7	14	29	40	5	21	13	56	19	7	9	13	21	34	27	34	9	16	52.037	0.505	0	0	0	0	0	0	432	3	11	0.314667	0	4.27e-05	4.27e-05	261
NTPP8_b2781	458	0.271171	0.613909	0	54	74	75	61	0.662879	0.344697	0.515152	792	264	27	3	21	32	11	10	4	13	12	24	8	7	7	17	21	7	12	18	4	5	43.609	0.653	0	0	0	0	0	0	263	1	11	0.253361	0	2.13e-05	2.13e-05	306
UGLCURPpp_b0480	71	0.26015	0.883051	0	100	142	176	133	0.597096	0.368421	0.560799	1653	551	48	2	38	35	19	50	10	28	41	44	16	27	26	28	20	21	29	40	7	21	41.884	0.666	0	0	0	0	0	0	550	0	0	0	0	0	0	0
ARGabcpp_b0861	61	0.0568044	0.642087	0	32	44	101	46	0.515695	0.390135	0.659193	669	223	18	2	2	9	10	13	2	16	7	42	8	4	9	7	8	15	18	14	4	14	38.78	0.632	0	0	0	0	0	0	222	1	13	0.195002	0	2.13e-05	2.13e-05	261
AGMtex_b1377	49	0.0274733	0.683685	1	68	140	60	110	0.550265	0.399471	0.449735	1134	378	42	0	37	12	19	43	5	9	17	27	9	33	5	14	11	21	24	17	5	27	40.354	0.74	3	3	3	3	3	3	377	9	11	0.316783	1.08e-05	0.000107	0.000107	261
MCTP1App_b3396	204	0.0245856	0.567549	0	123	195	297	236	0.609871	0.430082	0.626322	2553	851	88	4	41	42	29	70	10	48	32	63	21	40	48	58	46	46	49	65	14	36	43.186	0.662	2	2	1	1	1	1	850	173	10	0.332971	0.000137	0.00185703	0.00185703	306
FE3HOXtonex_b0150	69	0.497418	1.30569	0	111	237	185	215	0.566845	0.435829	0.534759	2244	748	69	4	49	35	36	62	8	17	40	46	12	43	37	33	33	54	58	60	9	42	42.395	0.722	0	0	0	0	0	0	747	8	11	0.315072	3.39e-07	9.61e-05	9.61e-05	261
AKGtex_b1377	49	0.0274733	0.683685	1	68	140	60	110	0.550265	0.399471	0.449735	1134	378	42	0	37	12	19	43	5	9	17	27	9	33	5	14	11	21	24	17	5	27	40.354	0.74	3	3	3	3	3	3	377	3	11	0.314667	0	4.27e-05	4.27e-05	261
SUCCt2_2pp_b3528	176	0.0628768	1.03015	0	59	107	130	133	0.564103	0.37296	0.613054	1287	429	44	4	14	12	25	42	6	47	21	52	15	11	11	13	10	26	22	43	1	9	41.963	0.64	1	1	1	1	1	1	428	0	0	0	0	0	0	307
CRNabcpp_b2679	85	0.0960721	1.60442	0	54	73	91	113	0.55287	0.407855	0.616314	993	331	41	2	20	13	13	27	8	15	24	22	7	22	15	16	4	12	26	21	8	14	45.371	0.715	0	0	0	0	0	0	330	1	2	0.666667	0	2.13e-05	2.13e-05	73
FRD2_b4154	87	0.016741	1.06819	0	97	143	152	211	0.656716	0.432836	0.60199	1809	603	61	10	35	44	20	66	21	23	27	48	20	23	22	22	38	20	36	42	7	17	39.172	0.768	1	1	1	1	1	1	602	0	0	0	0	0	0	121
PLIPA1A161pp_b3821	101	0.0282509	0.656571	0	38	73	92	87	0.524138	0.396552	0.617241	870	290	18	0	16	15	10	23	5	9	10	29	8	20	13	12	13	19	18	18	10	23	46.721	0.641	0	0	0	0	0	0	289	3	10	0.179909	0	4.27e-05	4.27e-05	198
S4FE4ST_b1682	500	0.417541	0.719378	0	46	60	72	71	0.60241	0.337349	0.574297	747	249	13	1	20	19	10	23	5	14	14	30	6	6	8	12	12	16	10	20	1	8	46.969	0.566	1	1	1	0	0	0	248	272	9	0.398115	0.000782	0.00291362	0.00291362	91
CYStex_b0241	57	0.045701	0.726706	0	70	118	72	92	0.502841	0.372159	0.465909	1056	352	31	0	31	14	21	37	1	14	25	23	9	27	3	17	12	21	24	16	3	22	46.295	0.669	3	3	3	3	3	3	351	2	11	0.314587	0	3.2e-05	3.2e-05	261
ASR_b3503	211	0.107097	0.810019	2	25	35	46	36	0.605634	0.373239	0.577465	426	142	7	2	9	13	3	8	3	12	8	16	4	6	10	2	10	6	10	9	0	3	40.421	0.66	0	0	0	0	0	0	141	0	0	0	0	0	0	0
THMtex_b0241	57	0.045701	0.726706	0	70	118	72	92	0.502841	0.372159	0.465909	1056	352	31	0	31	14	21	37	1	14	25	23	9	27	3	17	12	21	24	16	3	22	46.295	0.669	3	3	3	3	3	3	351	0	0	0	0	0	0	0
UDPGtex_b1377	49	0.0274733	0.683685	1	68	140	60	110	0.550265	0.399471	0.449735	1134	378	42	0	37	12	19	43	5	9	17	27	9	33	5	14	11	21	24	17	5	27	40.354	0.74	3	3	3	3	3	3	377	0	0	0	0	0	0	0
DCYTt2pp_b2964	18	0.0429157	0.914842	0	52	100	131	136	0.470167	0.384248	0.637232	1257	419	37	4	10	7	38	30	7	40	14	47	24	12	13	15	7	32	28	30	10	13	43.146	0.717	1	1	1	1	1	1	418	0	0	0	0	0	0	0
ORNDC_b0693	70	0.0506527	0.744129	1	148	226	176	183	0.61528	0.375171	0.489768	2199	733	65	18	36	54	38	50	24	36	29	72	14	37	41	37	39	31	24	50	6	31	47.439	0.653	1	1	1	1	1	1	732	2	10	0.306557	409000000	3.2e-05	3.2e-05	306
ALAALAabcpp_b1486	40	0.135377	0.986384	0	54	84	109	94	0.636364	0.416422	0.595308	1023	341	30	3	16	10	17	34	7	27	0	59	4	6	17	10	19	13	15	32	10	11	53.246	0.53	3	3	3	3	3	2	340	1	10	0.306327	0	2.13e-05	2.13e-05	306
DSERtex_b0929	44	1.53858	2.15677	0	56	129	52	126	0.556474	0.385675	0.490358	1089	363	34	0	27	14	19	49	1	14	19	23	5	32	5	13	12	16	22	26	2	29	37.082	0.832	3	3	3	3	3	3	362	0	0	0	0	0	0	0
TRPtex_b1377	49	0.0274733	0.683685	1	68	140	60	110	0.550265	0.399471	0.449735	1134	378	42	0	37	12	19	43	5	9	17	27	9	33	5	14	11	21	24	17	5	27	40.354	0.74	3	3	3	3	3	3	377	3	11	0.314667	0	4.27e-05	4.27e-05	261
PLIPA1G141pp_b3821	101	0.0282509	0.656571	0	38	73	92	87	0.524138	0.396552	0.617241	870	290	18	0	16	15	10	23	5	9	10	29	8	20	13	12	13	19	18	18	10	23	46.721	0.641	0	0	0	0	0	0	289	4	11	0.147893	6.37e-05	5.34e-05	5.34e-05	198
BUTSO3abcpp_b0367	121	0.0373658	0.932996	0	43	58	124	51	0.630435	0.452899	0.634058	828	276	32	0	3	9	10	22	3	24	5	49	7	1	17	13	15	14	15	24	9	3	38.471	0.549	0	0	0	0	0	0	275	0	0	0	0	0	0	0
Htex_b1377	49	0.0274733	0.683685	1	68	140	60	110	0.550265	0.399471	0.449735	1134	378	42	0	37	12	19	43	5	9	17	27	9	33	5	14	11	21	24	17	5	27	40.354	0.74	3	3	3	3	3	3	377	4	11	0.314748	0	5.34e-05	5.34e-05	261
UREAtpp_b3927	146	0.0469842	1.16679	0	43	95	63	81	0.570922	0.446809	0.510638	846	282	34	6	8	9	21	32	5	21	8	30	6	7	15	7	7	12	15	26	5	7	46.81	0.601	0	0	0	0	0	0	281	3	1	1	0	4.27e-05	4.27e-05	2
23CAMPtex_b1377	49	0.0274733	0.683685	1	68	140	60	110	0.550265	0.399471	0.449735	1134	378	42	0	37	12	19	43	5	9	17	27	9	33	5	14	11	21	24	17	5	27	40.354	0.74	3	3	3	3	3	3	377	0	0	0	0	0	0	0
PLIPA2G160pp_b3821	101	0.0282509	0.656571	0	38	73	92	87	0.524138	0.396552	0.617241	870	290	18	0	16	15	10	23	5	9	10	29	8	20	13	12	13	19	18	18	10	23	46.721	0.641	0	0	0	0	0	0	289	2	10	0.179935	0	3.2e-05	3.2e-05	198
DCMPtex_b0241	57	0.045701	0.726706	0	70	118	72	92	0.502841	0.372159	0.465909	1056	352	31	0	31	14	21	37	1	14	25	23	9	27	3	17	12	21	24	16	3	22	46.295	0.669	3	3	3	3	3	3	351	0	0	0	0	0	0	0
ARGabcpp_b2307	75	0.0323296	0.987161	0	31	69	71	68	0.48954	0.41841	0.58159	717	239	24	3	3	9	16	13	5	23	7	33	3	6	9	4	12	14	19	16	5	14	49.333	0.6	0	0	0	0	0	0	238	1	13	0.195002	0	2.13e-05	2.13e-05	261
NTD12_b2291	94	0.0518436	0.646284	0	43	47	60	50	0.605	0.325	0.55	600	200	23	2	10	19	9	4	7	10	12	25	7	9	7	9	10	13	5	11	1	6	49.861	0.613	0	0	0	0	0	0	199	5	11	0.246528	0.000553	6.4e-05	6.4e-05	30
METSOXR1_b4219	508	0.228528	0.698121	0	30	65	55	63	0.624413	0.455399	0.553991	639	213	24	4	13	11	7	19	9	9	3	13	7	8	16	10	9	9	13	12	3	13	47.878	0.625	0	0	0	0	0	0	212	6	11	0.316292	6.65e-05	7.47e-05	7.47e-05	261
PAPA140_b1278	82	0.0324914	0.618938	0	72	65	75	43	0.588235	0.466667	0.462745	765	255	29	2	3	15	11	15	6	16	10	32	5	3	13	11	18	10	15	21	17	2	55.788	0.485	0	0	0	0	0	0	254	1	2	0.6	0	2.13e-05	2.13e-05	4
ALCD19_b0356	234	0.0128515	0.708422	0	63	102	82	123	0.624324	0.432432	0.554054	1110	370	31	10	21	22	14	43	12	22	20	22	8	12	18	9	15	16	23	41	3	7	40.752	0.72	1	1	1	1	1	0	369	5	11	0.31491	1.28e-06	6.4e-05	6.4e-05	261
ALTRH_b3091	106	0.477699	1.01471	0	69	124	145	158	0.614919	0.385081	0.610887	1488	496	45	9	33	29	20	47	16	27	21	45	11	29	17	24	23	17	31	36	2	13	43.742	0.703	0	0	0	0	0	0	495	0	0	0	0	0	0	0
MLTGY1pp_b2701	162	0.420148	0.872148	0	51	75	127	109	0.588398	0.414365	0.651934	1086	362	31	1	18	10	17	33	7	12	16	33	11	20	22	26	17	18	20	24	8	17	46.593	0.649	0	0	0	0	0	0	361	0	0	0	0	0	0	212
FORtppi_b2492	32	0.0221891	0.500296	0	34	79	83	87	0.487633	0.448763	0.600707	849	283	35	11	4	6	19	18	9	22	7	35	15	9	9	4	10	25	12	22	6	4	50.155	0.566	1	1	1	1	1	1	282	6	10	0.296467	0.00249052	7.47e-05	7.47e-05	302
NO3tex_b2215	64	0.0280042	1.90111	9	51	107	58	152	0.570652	0.377717	0.570652	1104	368	29	0	32	11	19	48	1	10	17	27	4	32	4	21	13	17	24	25	4	29	29.032	0.898	3	3	3	3	3	3	367	0	0	0	0	0	0	0
ACACtex_b0241	57	0.045701	0.726706	0	70	118	72	92	0.502841	0.372159	0.465909	1056	352	31	0	31	14	21	37	1	14	25	23	9	27	3	17	12	21	24	16	3	22	46.295	0.669	3	3	3	3	3	3	351	0	0	0	0	0	0	0
GLYCtex_b0241	57	0.045701	0.726706	0	70	118	72	92	0.502841	0.372159	0.465909	1056	352	31	0	31	14	21	37	1	14	25	23	9	27	3	17	12	21	24	16	3	22	46.295	0.669	3	3	3	3	3	3	351	2	11	0.314587	0	3.2e-05	3.2e-05	261
G3PItex_b0241	57	0.045701	0.726706	0	70	118	72	92	0.502841	0.372159	0.465909	1056	352	31	0	31	14	21	37	1	14	25	23	9	27	3	17	12	21	24	16	3	22	46.295	0.669	3	3	3	3	3	3	351	0	0	0	0	0	0	0
FLVRx_b3844	56	0.109404	0.751612	0	35	69	75	55	0.615385	0.41453	0.555556	702	234	23	3	17	18	10	16	7	17	7	21	7	4	9	6	19	10	13	16	3	7	48.522	0.614	0	0	0	0	0	0	233	1	11	0.314506	0	2.13e-05	2.13e-05	261
XMPtex_b0929	44	1.53858	2.15677	0	56	129	52	126	0.556474	0.385675	0.490358	1089	363	34	0	27	14	19	49	1	14	19	23	5	32	5	13	12	16	22	26	2	29	37.082	0.832	3	3	3	3	3	3	362	0	0	0	0	0	0	0
TMAOR1_b0895	81	0.00534415	0.673661	1	29	64	50	63	0.548544	0.456311	0.548544	618	206	15	16	15	12	7	16	7	8	14	9	4	8	14	4	10	8	12	13	2	11	43.02	0.725	4	4	4	4	4	1	205	0	0	0	0	0	0	0
ASO3tex_b1377	49	0.0274733	0.683685	1	68	140	60	110	0.550265	0.399471	0.449735	1134	378	42	0	37	12	19	43	5	9	17	27	9	33	5	14	11	21	24	17	5	27	40.354	0.74	3	3	3	3	3	3	377	0	0	0	0	0	0	0
S2FE2ST_b1682	500	0.417541	0.719378	0	46	60	72	71	0.60241	0.337349	0.574297	747	249	13	1	20	19	10	23	5	14	14	30	6	6	8	12	12	16	10	20	1	8	46.969	0.566	1	1	1	0	0	0	248	270	9	0.405898	0.000782	0.00289227	0.00289227	91
RBK_L1_b0063	78	0.141645	0.857733	2	84	134	165	184	0.64903	0.47619	0.61552	1701	567	79	15	30	29	19	43	13	31	16	49	9	18	32	34	26	33	26	39	16	9	41.706	0.679	0	0	0	0	0	0	566	0	0	0	0	0	0	0
LYXtex_b0929	44	1.53858	2.15677	0	56	129	52	126	0.556474	0.385675	0.490358	1089	363	34	0	27	14	19	49	1	14	19	23	5	32	5	13	12	16	22	26	2	29	37.082	0.832	3	3	3	3	3	3	362	0	0	0	0	0	0	0
PSERT_b0907	274	0.715163	1.37358	12	58	117	89	99	0.595041	0.391185	0.517906	1089	363	41	4	25	19	18	29	6	19	20	30	11	20	15	11	16	20	12	28	5	13	47.793	0.669	0	0	0	0	0	0	362	4	10	0.311705	1.05e-06	5.34e-05	5.34e-05	302
LACZpp_b2132	113	0.170315	0.42321	0	118	169	262	217	0.592689	0.408616	0.625326	2298	766	73	1	54	40	25	61	10	29	53	65	27	28	38	28	33	53	46	67	8	26	42.397	0.683	0	0	0	0	0	0	765	0	0	0	0	0	0	0
GAL1Ptex_b0241	57	0.045701	0.726706	0	70	118	72	92	0.502841	0.372159	0.465909	1056	352	31	0	31	14	21	37	1	14	25	23	9	27	3	17	12	21	24	16	3	22	46.295	0.669	3	3	3	3	3	3	351	0	0	0	0	0	0	0
PYDXNK_b2418	27	0.5487	0.654483	0	44	73	92	75	0.591549	0.387324	0.588028	852	284	27	2	19	13	6	18	5	17	12	37	5	10	12	14	12	20	16	26	3	9	49.587	0.56	0	0	0	0	0	0	283	1	1	1	0	2.13e-05	2.13e-05	293
GSNK_b0477	45	0.0519834	0.894175	0	76	107	130	122	0.577011	0.4	0.57931	1305	435	38	7	24	30	13	29	13	21	21	42	11	21	22	18	20	30	22	26	6	20	41.31	0.659	0	0	0	0	0	0	434	0	0	0	0	0	0	163
BWCOGDS2_b3856	184	0.18223	0.79815	0	44	48	55	29	0.619318	0.363636	0.477273	528	176	18	1	15	12	5	12	6	11	12	22	6	3	7	6	8	6	9	12	3	1	54.16	0.485	0	0	0	0	0	0	175	0	0	0	0	0	0	0
ALAALAtex_b0241	57	0.045701	0.726706	0	70	118	72	92	0.502841	0.372159	0.465909	1056	352	31	0	31	14	21	37	1	14	25	23	9	27	3	17	12	21	24	16	3	22	46.295	0.669	3	3	3	3	3	3	351	2	11	0.314587	0	3.2e-05	3.2e-05	261
HEMEOS_b0428	133	0.113856	1.02853	4	25	69	110	93	0.52862	0.400673	0.683502	891	297	32	3	10	2	16	27	4	25	13	34	12	7	10	4	9	21	10	33	7	17	46.918	0.638	0	0	0	0	0	0	296	350	9	0.427127	0.00299896	0.00374608	0.00374608	306
PROt4pp_b1015	159	0.181786	0.797271	0	58	126	191	128	0.536779	0.439364	0.634195	1509	503	62	5	12	15	33	47	9	47	12	59	18	14	14	10	19	38	21	39	15	13	40.835	0.645	0	0	0	0	0	0	502	1	13	0.193492	0	2.13e-05	2.13e-05	261
EDD_b1851	142	0.0399249	0.580083	0	114	166	179	145	0.635762	0.437086	0.536424	1812	604	67	8	28	36	18	55	20	25	20	62	23	26	32	20	32	38	28	51	4	10	46.035	0.634	0	0	0	0	0	0	603	1	1	1	0	2.13e-05	2.13e-05	97
LIPOtex_b2215	64	0.0280042	1.90111	9	51	107	58	152	0.570652	0.377717	0.570652	1104	368	29	0	32	11	19	48	1	10	17	27	4	32	4	21	13	17	24	25	4	29	29.032	0.898	3	3	3	3	3	3	367	0	0	0	0	0	0	0
G3PIabcpp_b3451	113	0.301202	1.14633	2	26	48	113	95	0.510638	0.382979	0.737589	846	282	25	1	8	9	23	14	3	25	5	37	16	11	15	5	10	12	23	26	8	5	41.782	0.626	2	0	0	0	0	0	281	0	0	0	0	0	0	0
WCOS_b0827	333	0.0484977	0.55279	0	71	100	120	121	0.650485	0.456311	0.584951	1236	412	37	6	19	27	19	43	5	20	10	43	8	13	24	19	24	25	25	35	4	5	43.082	0.638	0	0	0	0	0	0	411	0	0	0	0	0	0	0
CYTDtex_b1377	49	0.0274733	0.683685	1	68	140	60	110	0.550265	0.399471	0.449735	1134	378	42	0	37	12	19	43	5	9	17	27	9	33	5	14	11	21	24	17	5	27	40.354	0.74	3	3	3	3	3	3	377	3	11	0.31491	0.000829	4.27e-05	4.27e-05	261
HIStex_b0241	57	0.045701	0.726706	0	70	118	72	92	0.502841	0.372159	0.465909	1056	352	31	0	31	14	21	37	1	14	25	23	9	27	3	17	12	21	24	16	3	22	46.295	0.669	3	3	3	3	3	3	351	3	11	0.31491	0.000829	4.27e-05	4.27e-05	261
APPLDHr_b3945	117	0.28222	1.12172	1	72	100	103	93	0.663043	0.445652	0.532609	1104	368	57	7	16	29	10	35	9	22	13	37	7	10	16	13	12	12	22	27	3	10	43.854	0.717	0	0	0	0	0	0	367	0	0	0	0	0	0	0
LPLIPAL2E160_b3825	63	0.201587	0.617796	0	60	99	89	93	0.648094	0.431085	0.533724	1023	341	33	3	23	18	21	26	16	18	5	26	8	10	17	14	36	11	14	24	7	10	54.742	0.58	0	0	0	0	0	0	340	5	8	0.276274	0.0270683	6.4e-05	6.4e-05	198
5DGLCNtex_b2215	64	0.0280042	1.90111	9	51	107	58	152	0.570652	0.377717	0.570652	1104	368	29	0	32	11	19	48	1	10	17	27	4	32	4	21	13	17	24	25	4	29	29.032	0.898	3	3	3	3	3	3	367	6	11	0.315234	0.000578	7.47e-05	7.47e-05	261
ULA4NFT_b2255	47	0.093411	1.29715	0	115	195	161	190	0.600605	0.402421	0.531014	1983	661	53	11	35	43	28	48	27	52	25	63	9	28	35	20	45	36	27	42	10	23	44.311	0.625	0	0	0	0	0	0	660	64	11	0.334334	0.000232	0.000694	0.000694	306
MSO3abcpp_b0933	108	0.0580024	0.660756	0	60	55	102	39	0.6875	0.429688	0.550781	768	256	28	0	13	17	3	24	5	9	7	44	6	7	10	13	22	9	13	20	4	1	47.098	0.503	19	19	19	19	17	12	255	0	0	0	0	0	0	0
PUNP4_b4384	173	0.156214	1.07229	0	38	61	46	95	0.591667	0.391667	0.5875	720	240	26	4	19	14	12	23	6	18	14	15	12	7	6	2	12	9	14	20	0	6	35.287	0.824	0	0	0	0	0	0	239	2	1	1	6.79e-07	3.2e-05	3.2e-05	290
PSERtex_b0929	44	1.53858	2.15677	0	56	129	52	126	0.556474	0.385675	0.490358	1089	363	34	0	27	14	19	49	1	14	19	23	5	32	5	13	12	16	22	26	2	29	37.082	0.832	3	3	3	3	3	3	362	0	0	0	0	0	0	0
23PDE7pp_b4213	95	0.0121502	0.840414	0	112	183	179	174	0.567901	0.371914	0.544753	1944	648	73	2	54	27	22	45	11	36	50	47	16	41	31	21	18	32	33	52	7	29	44.263	0.649	0	0	0	0	0	0	647	0	0	0	0	0	0	0
NTRIR4pp_b4072	148	0.00457815	0.728758	0	17	53	75	79	0.571429	0.477679	0.6875	672	224	18	16	12	8	9	16	4	8	14	15	3	7	14	8	16	11	14	21	1	8	43.458	0.633	0	0	0	0	0	0	223	0	0	0	0	0	0	0
12PPDRtex_b2215	64	0.0280042	1.90111	9	51	107	58	152	0.570652	0.377717	0.570652	1104	368	29	0	32	11	19	48	1	10	17	27	4	32	4	21	13	17	24	25	4	29	29.032	0.898	3	3	3	3	3	3	367	7	11	0.314991	6.79e-07	8.54e-05	8.54e-05	261
ACGAL1Ptex_b2215	64	0.0280042	1.90111	9	51	107	58	152	0.570652	0.377717	0.570652	1104	368	29	0	32	11	19	48	1	10	17	27	4	32	4	21	13	17	24	25	4	29	29.032	0.898	3	3	3	3	3	3	367	0	0	0	0	0	0	0
ADEtex_b1377	49	0.0274733	0.683685	1	68	140	60	110	0.550265	0.399471	0.449735	1134	378	42	0	37	12	19	43	5	9	17	27	9	33	5	14	11	21	24	17	5	27	40.354	0.74	3	3	3	3	3	3	377	3	11	0.314667	0	4.27e-05	4.27e-05	261
PHYTSpp_b0980	52	0.211428	1.27464	0	100	94	142	97	0.600462	0.464203	0.551963	1299	433	40	8	19	21	13	29	8	17	15	58	6	16	32	30	22	28	34	24	8	4	53.672	0.506	0	0	0	0	0	0	432	0	0	0	0	0	0	0
ADOCBLabcpp_b1709	26	0.0623785	0.466835	0	51	60	89	50	0.656	0.444	0.556	750	250	27	1	10	10	3	21	10	9	8	39	9	8	11	18	15	17	14	12	4	3	52.776	0.514	0	0	0	0	0	0	249	0	0	0	0	0	0	0
CDAPPA141_b3918	68	0.177121	0.562483	0	51	79	77	45	0.575397	0.400794	0.484127	756	252	18	4	9	16	7	14	6	12	9	31	8	15	16	14	19	15	11	16	4	7	47.779	0.536	0	0	0	0	0	0	251	1	14	0.108196	0	2.13e-05	2.13e-05	198
SBTPD_b2705	28	0.220624	1.1457	0	39	61	78	82	0.596154	0.388462	0.615385	780	260	25	4	14	9	12	29	3	15	12	27	7	9	5	17	9	21	7	21	0	13	48.369	0.644	0	0	0	0	0	0	259	0	0	0	0	0	0	0
THRtex_b0929	44	1.53858	2.15677	0	56	129	52	126	0.556474	0.385675	0.490358	1089	363	34	0	27	14	19	49	1	14	19	23	5	32	5	13	12	16	22	26	2	29	37.082	0.832	3	3	3	3	3	3	362	2	11	0.314587	0	3.2e-05	3.2e-05	261
GLYK_b3926	448	0.162818	1.08625	0	78	115	146	164	0.586481	0.419483	0.616302	1509	503	46	5	27	40	14	43	9	34	22	36	15	20	14	20	32	21	37	36	13	18	40.82	0.729	0	0	0	0	0	0	502	1	10	0.306327	0	2.13e-05	2.13e-05	306
IMPtex_b0241	57	0.045701	0.726706	0	70	118	72	92	0.502841	0.372159	0.465909	1056	352	31	0	31	14	21	37	1	14	25	23	9	27	3	17	12	21	24	16	3	22	46.295	0.669	3	3	3	3	3	3	351	0	0	0	0	0	0	0
XYLI1_b3565	153	0.0100078	0.817116	3	82	116	129	114	0.60771	0.367347	0.55102	1323	441	44	4	24	33	25	38	19	13	24	42	12	20	14	25	19	16	19	23	8	18	43.798	0.686	0	0	0	0	0	0	440	0	0	0	0	0	0	0
FE3DCITtonex_b3005	218	0.0344865	0.980261	0	22	26	56	38	0.521127	0.323944	0.661972	426	142	12	0	12	8	5	6	3	8	10	14	9	8	8	2	2	4	14	13	0	3	44.707	0.653	0	0	0	0	0	0	141	0	0	0	0	0	0	0
AMALT3_b3416	90	0.0488311	0.657184	0	110	156	263	166	0.61295	0.42446	0.617266	2085	695	68	11	43	41	16	48	17	22	36	74	22	21	38	35	40	35	33	40	22	32	44.234	0.619	0	0	0	0	0	0	694	0	0	0	0	0	0	0
METSOX1tex_b2215	64	0.0280042	1.90111	9	51	107	58	152	0.570652	0.377717	0.570652	1104	368	29	0	32	11	19	48	1	10	17	27	4	32	4	21	13	17	24	25	4	29	29.032	0.898	3	3	3	3	3	3	367	0	0	0	0	0	0	0
SELCYSS_b3591	181	0.161952	0.590216	0	82	109	161	112	0.648707	0.443966	0.588362	1392	464	54	6	23	32	7	31	11	18	13	68	11	11	20	22	36	27	27	33	4	9	48.09	0.547	0	0	0	0	0	0	463	0	0	0	0	0	0	0
LYXtex_b2215	64	0.0280042	1.90111	9	51	107	58	152	0.570652	0.377717	0.570652	1104	368	29	0	32	11	19	48	1	10	17	27	4	32	4	21	13	17	24	25	4	29	29.032	0.898	3	3	3	3	3	3	367	0	0	0	0	0	0	0
SUCDi_b0722	84	0.452917	1.29038	3	13	27	35	41	0.534483	0.344828	0.655172	348	116	11	0	2	2	9	8	2	10	2	16	4	2	1	2	3	5	7	19	4	6	38.614	0.671	0	0	0	0	0	0	115	1	10	0.295894	0	2.13e-05	2.13e-05	302
MSO3tex_b0241	57	0.045701	0.726706	0	70	118	72	92	0.502841	0.372159	0.465909	1056	352	31	0	31	14	21	37	1	14	25	23	9	27	3	17	12	21	24	16	3	22	46.295	0.669	3	3	3	3	3	3	351	0	0	0	0	0	0	0
DHORTS_b1062	203	0.596186	1.6323	5	68	87	83	111	0.624642	0.412607	0.555874	1047	349	33	6	19	23	16	19	14	16	9	33	11	14	21	11	23	15	25	29	2	9	51.239	0.621	0	0	0	0	0	0	348	171	10	0.327803	0.000977	0.00183569	0.00183569	91
ILEtex_b2215	64	0.0280042	1.90111	9	51	107	58	152	0.570652	0.377717	0.570652	1104	368	29	0	32	11	19	48	1	10	17	27	4	32	4	21	13	17	24	25	4	29	29.032	0.898	3	3	3	3	3	3	367	17	11	0.317358	0.000844	0.000192	0.000192	261
PPTtex_b0241	57	0.045701	0.726706	0	70	118	72	92	0.502841	0.372159	0.465909	1056	352	31	0	31	14	21	37	1	14	25	23	9	27	3	17	12	21	24	16	3	22	46.295	0.669	3	3	3	3	3	3	351	0	0	0	0	0	0	0
GLCURt2rpp_b3093	36	0.10157	1.22927	0	61	108	156	108	0.579677	0.443418	0.6097	1299	433	61	3	9	13	24	39	7	31	13	47	20	13	19	15	13	21	21	34	15	14	35.016	0.764	0	0	0	0	0	0	432	0	0	0	0	0	0	0
FRULYSDG_b3371	3	0.150164	0.921142	2	44	75	104	118	0.609971	0.372434	0.651026	1023	341	26	8	21	28	13	21	10	23	14	35	8	10	16	9	17	15	17	27	7	15	38.277	0.72	0	0	0	0	0	0	340	0	0	0	0	0	0	0
DGSNtex_b0241	57	0.045701	0.726706	0	70	118	72	92	0.502841	0.372159	0.465909	1056	352	31	0	31	14	21	37	1	14	25	23	9	27	3	17	12	21	24	16	3	22	46.295	0.669	3	3	3	3	3	3	351	0	0	0	0	0	0	0
NADH17pp_b2282	424	0.160003	1.02908	0	34	62	129	101	0.53681	0.383436	0.705521	978	326	30	3	8	10	30	26	4	26	8	41	16	9	15	12	10	19	12	28	10	8	37.474	0.708	0	0	0	0	0	0	325	0	0	0	0	0	0	224
CA2tex_b1377	49	0.0274733	0.683685	1	68	140	60	110	0.550265	0.399471	0.449735	1134	378	42	0	37	12	19	43	5	9	17	27	9	33	5	14	11	21	24	17	5	27	40.354	0.74	3	3	3	3	3	3	377	336	9	0.424022	0.000798	0.00359666	0.00359666	91
SUCDi_b0724	302	0.344158	1.22911	0	34	65	72	68	0.548117	0.414226	0.585774	717	239	14	11	18	11	8	16	3	14	11	27	9	12	17	9	17	16	6	9	2	8	48.908	0.605	1	1	1	1	1	1	238	1	10	0.295894	0	2.13e-05	2.13e-05	302
GLYC3Pabcpp_b3453	108	0.119204	1.28774	0	68	83	151	137	0.544419	0.410023	0.656036	1317	439	47	2	23	27	20	36	5	14	37	33	14	23	24	21	11	25	27	20	8	21	40.497	0.679	0	0	0	0	0	0	438	0	0	0	0	0	0	150
ALAALAabcpp_b3544	96	0.617704	1.94919	1	98	110	156	172	0.56903	0.365672	0.61194	1608	536	45	4	36	32	21	34	9	21	46	39	18	23	31	26	18	29	26	41	9	27	37.723	0.757	0	0	0	0	0	0	535	1	10	0.306327	0	2.13e-05	2.13e-05	306
NHFRBO_b2710	276	0.0243911	0.427807	0	75	97	143	165	0.570833	0.3875	0.641667	1440	480	35	8	35	33	19	27	15	28	20	36	16	27	21	18	24	26	33	34	11	13	41.689	0.682	0	0	0	0	0	0	479	0	0	0	0	0	0	0
GDPMNP_b2467	118	0.0586501	0.861082	0	34	47	51	60	0.5625	0.317708	0.578125	576	192	8	2	12	20	6	15	4	15	11	21	4	10	3	7	10	7	14	13	1	8	49.348	0.637	0	0	0	0	0	0	191	1	4	0.416667	0	2.13e-05	2.13e-05	276
MAN6Pt6_2pp_b3666	45	0.0629608	0.703357	0	55	104	142	163	0.523707	0.405172	0.657328	1392	464	44	6	13	17	35	52	3	39	23	56	16	12	10	14	14	29	24	28	9	19	41.785	0.7	0	0	0	0	0	0	463	0	0	0	0	0	0	0
PPA_b2502	137	0.0566838	0.556349	0	107	136	152	119	0.622568	0.385214	0.527237	1542	514	41	4	20	42	21	35	17	29	21	64	17	18	22	29	38	26	24	29	8	8	50.17	0.581	1	1	1	1	1	1	513	2	3	0.571429	2.04e-06	3.2e-05	3.2e-05	126
G3PGtex_b1377	49	0.0274733	0.683685	1	68	140	60	110	0.550265	0.399471	0.449735	1134	378	42	0	37	12	19	43	5	9	17	27	9	33	5	14	11	21	24	17	5	27	40.354	0.74	3	3	3	3	3	3	377	2	11	0.314587	0	3.2e-05	3.2e-05	261
GLNS_b1297	58	0.483673	1.21859	1	69	121	153	130	0.646934	0.359408	0.598309	1419	473	38	8	29	43	18	32	14	17	13	53	17	27	26	23	29	19	15	33	3	15	47.058	0.625	0	0	0	0	0	0	472	201	10	0.334152	0.00445781	0.00215586	0.00215586	91
LALADGLUtpp_b3496	42	0.251587	0.857971	0	67	104	162	157	0.532653	0.371429	0.65102	1470	490	45	5	12	10	43	43	7	34	16	69	25	16	23	13	10	24	25	45	7	17	50.178	0.589	1	1	1	1	1	1	489	0	0	0	0	0	0	0
PNTOtex_b0241	57	0.045701	0.726706	0	70	118	72	92	0.502841	0.372159	0.465909	1056	352	31	0	31	14	21	37	1	14	25	23	9	27	3	17	12	21	24	16	3	22	46.295	0.669	3	3	3	3	3	3	351	0	0	0	0	0	0	0
GLCRtex_b0241	57	0.045701	0.726706	0	70	118	72	92	0.502841	0.372159	0.465909	1056	352	31	0	31	14	21	37	1	14	25	23	9	27	3	17	12	21	24	16	3	22	46.295	0.669	3	3	3	3	3	3	351	0	0	0	0	0	0	0
HCYSMT2_b0261	66	0.0907376	0.593825	0	38	68	130	75	0.678457	0.472669	0.659164	933	311	51	8	16	20	6	22	11	9	7	43	2	9	14	12	17	16	14	16	4	13	39.727	0.623	0	0	0	0	0	0	310	0	0	0	0	0	0	0
BUTSO3tex_b1377	49	0.0274733	0.683685	1	68	140	60	110	0.550265	0.399471	0.449735	1134	378	42	0	37	12	19	43	5	9	17	27	9	33	5	14	11	21	24	17	5	27	40.354	0.74	3	3	3	3	3	3	377	0	0	0	0	0	0	0
G3PCtex_b0929	44	1.53858	2.15677	0	56	129	52	126	0.556474	0.385675	0.490358	1089	363	34	0	27	14	19	49	1	14	19	23	5	32	5	13	12	16	22	26	2	29	37.082	0.832	3	3	3	3	3	3	362	0	0	0	0	0	0	0
FEOXAMtonex_b0150	69	0.497418	1.30569	0	111	237	185	215	0.566845	0.435829	0.534759	2244	748	69	4	49	35	36	62	8	17	40	46	12	43	37	33	33	54	58	60	9	42	42.395	0.722	0	0	0	0	0	0	747	8	11	0.315072	3.39e-07	9.61e-05	9.61e-05	261
THMtex_b1377	49	0.0274733	0.683685	1	68	140	60	110	0.550265	0.399471	0.449735	1134	378	42	0	37	12	19	43	5	9	17	27	9	33	5	14	11	21	24	17	5	27	40.354	0.74	3	3	3	3	3	3	377	0	0	0	0	0	0	0
BUTSO3tex_b2215	64	0.0280042	1.90111	9	51	107	58	152	0.570652	0.377717	0.570652	1104	368	29	0	32	11	19	48	1	10	17	27	4	32	4	21	13	17	24	25	4	29	29.032	0.898	3	3	3	3	3	3	367	0	0	0	0	0	0	0
GUAPRT_b0125	369	0.0584745	0.895375	2	27	48	56	48	0.597765	0.340782	0.581006	537	179	7	2	15	15	6	12	3	16	10	17	7	2	6	3	13	14	7	17	0	6	34.766	0.761	0	0	0	0	0	0	178	0	0	0	0	0	0	169
HCYSMT_b0261	66	0.0907376	0.593825	0	38	68	130	75	0.678457	0.472669	0.659164	933	311	51	8	16	20	6	22	11	9	7	43	2	9	14	12	17	16	14	16	4	13	39.727	0.623	0	0	0	0	0	0	310	7	11	0.314991	0	8.54e-05	8.54e-05	91
PLIPA1G181pp_b3821	101	0.0282509	0.656571	0	38	73	92	87	0.524138	0.396552	0.617241	870	290	18	0	16	15	10	23	5	9	10	29	8	20	13	12	13	19	18	18	10	23	46.721	0.641	0	0	0	0	0	0	289	4	10	0.177331	1.74e-05	5.34e-05	5.34e-05	198
DGMPtex_b2215	64	0.0280042	1.90111	9	51	107	58	152	0.570652	0.377717	0.570652	1104	368	29	0	32	11	19	48	1	10	17	27	4	32	4	21	13	17	24	25	4	29	29.032	0.898	3	3	3	3	3	3	367	0	0	0	0	0	0	0
RNTR2c2_b4238	108	0.0513211	0.838836	0	97	172	199	245	0.593268	0.389902	0.622721	2139	713	58	16	41	52	27	56	19	43	42	53	12	40	30	27	45	31	36	46	6	32	37.812	0.746	0	0	0	0	0	0	712	1	10	0.295894	0	2.13e-05	2.13e-05	302
PHEt2rpp_b0112	54	0.485507	1.29082	4	70	100	150	138	0.561135	0.39083	0.628821	1374	458	52	4	5	16	29	42	7	38	15	54	20	18	17	15	10	24	18	46	12	15	39.487	0.692	6	6	6	6	6	6	457	5	11	0.31491	0	6.4e-05	6.4e-05	261
VALabcpp_b3455	374	0.0727302	0.529137	0	35	51	91	79	0.617188	0.375	0.664062	768	256	18	2	8	18	7	21	7	15	7	37	9	16	12	15	18	8	16	15	1	5	44.305	0.62	0	0	0	0	0	0	255	1	13	0.19337	0	2.13e-05	2.13e-05	261
TMAOR1_b1588	14	0.0221629	0.767633	0	157	216	185	250	0.561881	0.435644	0.538366	2424	808	67	13	48	50	20	65	23	52	45	55	25	38	44	24	48	49	49	45	17	30	52.085	0.598	2	2	2	2	2	2	807	0	0	0	0	0	0	0
ATPS4rpp_b3737	18	0.00345551	0.888772	0	7	25	30	18	0.6625	0.3625	0.6	240	80	13	0	3	2	4	10	0	8	1	12	8	2	3	2	2	0	1	6	0	2	32.226	0.784	0	0	0	0	0	0	79	0	0	0	0	0	0	60
DURIPP_b4382	261	0.0550291	0.965007	0	68	109	126	138	0.62585	0.430839	0.598639	1323	441	56	2	33	24	16	39	6	27	22	37	19	12	15	11	24	23	29	34	2	9	38.558	0.734	0	0	0	0	0	0	440	0	0	0	0	0	0	94
GLCRD_b2788	47	0.0826553	0.935784	2	65	136	125	121	0.644295	0.425056	0.550336	1341	447	48	6	29	23	15	43	14	20	19	41	11	22	24	18	22	10	25	35	11	10	46.615	0.626	1	1	1	1	1	1	446	0	0	0	0	0	0	0
NADH18pp_b2287	471	0.0238767	0.890042	0	32	63	65	61	0.59276	0.38914	0.570136	663	221	13	5	13	14	6	15	1	11	9	14	12	11	14	11	16	10	9	22	4	10	47.186	0.704	2	2	2	2	2	0	220	1	15	0.140369	0	2.13e-05	2.13e-05	261
GLUt2rpp_b4077	121	0.0543458	0.882204	0	42	107	178	111	0.559361	0.378995	0.659817	1314	438	41	1	14	14	23	33	8	46	18	57	13	8	14	10	12	35	24	49	6	11	40.689	0.678	1	1	1	1	1	1	437	0	0	0	0	0	0	146
G3PGtex_b2215	64	0.0280042	1.90111	9	51	107	58	152	0.570652	0.377717	0.570652	1104	368	29	0	32	11	19	48	1	10	17	27	4	32	4	21	13	17	24	25	4	29	29.032	0.898	3	3	3	3	3	3	367	2	11	0.314587	0	3.2e-05	3.2e-05	261
MLTGY3pp_b2813	109	0.289572	0.649107	0	52	111	103	100	0.601093	0.428962	0.554645	1098	366	32	1	18	15	17	41	8	18	16	23	11	20	20	20	22	23	11	24	6	19	42.004	0.691	0	0	0	0	0	0	365	0	0	0	0	0	0	214
AIRC3_b0523	622	0.179014	0.968649	1	30	32	51	57	0.676471	0.458824	0.635294	510	170	28	0	7	9	4	13	6	10	6	14	5	7	10	7	7	11	6	15	2	2	39.301	0.719	0	0	0	0	0	0	169	169	10	0.334791	0.000194	0.00181434	0.00181434	91
ACACT1r_b2224	368	0.219562	1.1178	2	88	112	101	94	0.635443	0.460759	0.493671	1185	395	67	5	15	18	10	44	6	25	18	39	12	16	11	18	14	22	19	29	0	6	51.384	0.574	3	3	3	3	3	3	394	7	1	1	0	8.54e-05	8.54e-05	173
ACACT2r_b2342	127	0.202332	1.34639	2	82	117	128	110	0.649886	0.480549	0.544622	1311	437	63	2	19	23	13	39	9	19	13	46	16	10	19	18	31	25	28	32	3	8	51.067	0.599	2	2	2	2	2	2	436	7	1	1	0	8.54e-05	8.54e-05	173
ACACT8r_b3845	151	0.130464	1.47873	1	50	103	130	105	0.659794	0.466495	0.60567	1164	388	57	7	18	20	11	37	12	20	11	36	21	13	16	13	23	23	16	28	2	3	39.064	0.685	2	2	2	2	2	2	387	2	1	1	0	3.2e-05	3.2e-05	175
GLYCAtex_b2215	64	0.0280042	1.90111	9	51	107	58	152	0.570652	0.377717	0.570652	1104	368	29	0	32	11	19	48	1	10	17	27	4	32	4	21	13	17	24	25	4	29	29.032	0.898	3	3	3	3	3	3	367	3	11	0.314667	0	4.27e-05	4.27e-05	261
HCO3E_b0339	149	0.0418162	0.628826	6	30	59	61	70	0.645455	0.477273	0.595455	660	220	30	6	9	12	8	12	6	13	5	17	4	7	15	10	16	17	7	19	2	4	53.298	0.585	0	0	0	0	0	0	219	201	10	0.346535	0.00498002	0.00215586	0.00215586	198
NTD4pp_b0480	71	0.26015	0.883051	0	100	142	176	133	0.597096	0.368421	0.560799	1653	551	48	2	38	35	19	50	10	28	41	44	16	27	26	28	20	21	29	40	7	21	41.884	0.666	0	0	0	0	0	0	550	0	0	0	0	0	0	0
UDCPDP_b0841	100	0.228847	1.76272	5	31	51	67	50	0.552764	0.407035	0.58794	597	199	19	3	8	2	11	12	8	15	4	32	7	5	8	6	8	13	6	16	11	4	50.451	0.536	0	0	0	0	0	0	198	198	10	0.335433	0.00134128	0.00212385	0.00212385	306
FMNRx2_b2763	145	0.376897	2.19522	6	74	113	197	187	0.607706	0.401051	0.672504	1713	571	47	6	30	46	20	49	17	38	35	52	14	30	27	15	41	16	35	30	8	14	39.77	0.691	0	0	0	0	0	0	570	1	11	0.314506	0	2.13e-05	2.13e-05	261
H2tex_b1377	49	0.0274733	0.683685	1	68	140	60	110	0.550265	0.399471	0.449735	1134	378	42	0	37	12	19	43	5	9	17	27	9	33	5	14	11	21	24	17	5	27	40.354	0.74	3	3	3	3	3	3	377	4	11	0.316292	0.00274462	5.34e-05	5.34e-05	261
Kt2pp_b3290	157	0.132401	0.908497	0	85	145	107	122	0.638344	0.366013	0.498911	1377	459	46	1	34	27	15	32	12	40	17	39	13	18	16	20	33	23	17	46	0	9	49.88	0.61	0	0	0	0	0	0	458	2	10	0.311546	1.05e-06	3.2e-05	3.2e-05	302
GALCTNtex_b2215	64	0.0280042	1.90111	9	51	107	58	152	0.570652	0.377717	0.570652	1104	368	29	0	32	11	19	48	1	10	17	27	4	32	4	21	13	17	24	25	4	29	29.032	0.898	3	3	3	3	3	3	367	0	0	0	0	0	0	0
CA2tex_b0929	44	1.53858	2.15677	0	56	129	52	126	0.556474	0.385675	0.490358	1089	363	34	0	27	14	19	49	1	14	19	23	5	32	5	13	12	16	22	26	2	29	37.082	0.832	3	3	3	3	3	3	362	336	9	0.424022	0.000798	0.00359666	0.00359666	91
MALDtex_b0929	44	1.53858	2.15677	0	56	129	52	126	0.556474	0.385675	0.490358	1089	363	34	0	27	14	19	49	1	14	19	23	5	32	5	13	12	16	22	26	2	29	37.082	0.832	3	3	3	3	3	3	362	0	0	0	0	0	0	0
TMAOR2pp_b0996	50	0.057848	0.986879	6	70	101	105	115	0.554987	0.419437	0.56266	1173	391	40	10	25	24	10	24	14	25	31	24	11	15	14	18	20	26	21	20	9	9	48.246	0.668	2	2	2	2	2	2	390	0	0	0	0	0	0	0
CO2tex_b0929	44	1.53858	2.15677	0	56	129	52	126	0.556474	0.385675	0.490358	1089	363	34	0	27	14	19	49	1	14	19	23	5	32	5	13	12	16	22	26	2	29	37.082	0.832	3	3	3	3	3	3	362	1	1	1	0	2.13e-05	2.13e-05	69
IDONt2rpp_b4265	57	0.238226	1.17862	1	76	126	116	122	0.552273	0.425	0.540909	1320	440	52	3	7	13	28	44	9	47	9	58	16	12	21	6	9	18	34	44	5	4	50.148	0.563	3	3	3	3	3	3	439	3	11	0.314667	0	4.27e-05	4.27e-05	261
FACOAE141_b0452	204	0.111435	0.81707	0	49	82	83	73	0.637631	0.393728	0.543554	861	287	22	1	12	19	16	21	12	12	10	31	5	11	20	16	16	20	10	21	3	8	48.274	0.628	0	0	0	0	0	0	286	0	0	0	0	0	0	108
MG2tex_b0929	44	1.53858	2.15677	0	56	129	52	126	0.556474	0.385675	0.490358	1089	363	34	0	27	14	19	49	1	14	19	23	5	32	5	13	12	16	22	26	2	29	37.082	0.832	3	3	3	3	3	3	362	336	9	0.424022	0.000798	0.00359666	0.00359666	91
MOBDtex_b1377	49	0.0274733	0.683685	1	68	140	60	110	0.550265	0.399471	0.449735	1134	378	42	0	37	12	19	43	5	9	17	27	9	33	5	14	11	21	24	17	5	27	40.354	0.74	3	3	3	3	3	3	377	336	9	0.424022	0.000798	0.00359666	0.00359666	91
TYRt2rpp_b1907	99	0.0718419	0.713963	0	67	118	141	78	0.561881	0.433168	0.542079	1212	404	47	3	8	5	26	43	8	25	7	69	12	8	15	11	13	24	23	38	6	12	51.199	0.544	0	0	0	0	0	0	403	5	11	0.315072	2.59e-06	6.4e-05	6.4e-05	261
HYD1pp_b2994	73	0.313146	0.661274	0	79	143	174	172	0.577465	0.401408	0.609155	1704	568	46	8	31	30	15	42	18	39	29	45	11	30	30	21	20	36	33	51	13	19	39.184	0.759	1	1	1	1	1	1	567	1	13	0.194414	0	2.13e-05	2.13e-05	261
PPKr_b2501	249	0.130215	0.561956	0	107	187	185	210	0.56894	0.323657	0.573295	2067	689	42	2	45	45	30	26	16	53	37	79	15	41	28	23	61	39	20	46	5	35	46.27	0.627	0	0	0	0	0	0	688	0	0	0	0	0	0	282
UDPGPpp_b0480	71	0.26015	0.883051	0	100	142	176	133	0.597096	0.368421	0.560799	1653	551	48	2	38	35	19	50	10	28	41	44	16	27	26	28	20	21	29	40	7	21	41.884	0.666	0	0	0	0	0	0	550	0	0	0	0	0	0	0
PROtex_b1377	49	0.0274733	0.683685	1	68	140	60	110	0.550265	0.399471	0.449735	1134	378	42	0	37	12	19	43	5	9	17	27	9	33	5	14	11	21	24	17	5	27	40.354	0.74	3	3	3	3	3	3	377	3	11	0.315072	0.00124322	4.27e-05	4.27e-05	261
ACMUMtex_b0241	57	0.045701	0.726706	0	70	118	72	92	0.502841	0.372159	0.465909	1056	352	31	0	31	14	21	37	1	14	25	23	9	27	3	17	12	21	24	16	3	22	46.295	0.669	3	3	3	3	3	3	351	0	0	0	0	0	0	0
INDOLEt2pp_b3266	45	0.0154516	1.36713	1	180	255	325	275	0.578744	0.38744	0.57971	3105	1035	108	3	44	44	52	83	9	62	41	114	40	46	46	53	32	64	58	101	7	27	51.669	0.587	2	2	2	2	2	2	1034	0	0	0	0	0	0	186
XYLUt2pp_b3579	82	0.101341	0.868047	8	72	66	84	107	0.577508	0.3769	0.580547	987	329	34	0	22	16	18	23	6	13	25	34	9	15	13	16	12	22	17	24	3	6	42.329	0.661	0	0	0	0	0	0	328	0	0	0	0	0	0	0
RNDR4b_b3610	285	0.171768	0.710785	0	14	22	21	27	0.583333	0.416667	0.571429	252	84	8	3	6	5	2	7	2	6	6	8	2	2	4	3	5	4	4	3	0	3	38.071	0.722	1	1	1	0	0	0	83	3	12	0.210012	1.53e-05	4.27e-05	4.27e-05	261
PANTS_b0133	504	0.0145703	0.606772	0	45	74	79	86	0.640845	0.359155	0.580986	852	284	24	2	22	19	9	18	4	20	17	32	9	8	12	11	21	12	12	25	1	5	43.337	0.659	0	0	0	0	0	0	283	336	9	0.424022	0.000798	0.00359666	0.00359666	91
SCYSDS_b1679	150	0.381418	0.852153	0	28	39	39	33	0.582734	0.359712	0.517986	417	139	13	2	8	9	4	6	1	12	6	16	5	5	6	12	10	7	3	7	3	3	48.052	0.579	0	0	0	0	0	0	138	274	9	0.406437	0.000783	0.00293496	0.00293496	91
LIPOtex_b0241	57	0.045701	0.726706	0	70	118	72	92	0.502841	0.372159	0.465909	1056	352	31	0	31	14	21	37	1	14	25	23	9	27	3	17	12	21	24	16	3	22	46.295	0.669	3	3	3	3	3	3	351	0	0	0	0	0	0	0
ACALDtex_b1377	49	0.0274733	0.683685	1	68	140	60	110	0.550265	0.399471	0.449735	1134	378	42	0	37	12	19	43	5	9	17	27	9	33	5	14	11	21	24	17	5	27	40.354	0.74	3	3	3	3	3	3	377	3	11	0.314667	0	4.27e-05	4.27e-05	261
4HTHRS_b0004	128	0.711587	1.42941	4	72	104	148	105	0.613054	0.382284	0.589744	1287	429	47	4	24	29	24	28	10	17	22	54	8	19	23	21	17	19	23	27	3	9	45.179	0.642	0	0	0	0	0	0	428	0	0	0	0	0	0	0
THRabcpp_b3454	391	0.832839	1.03879	3	27	48	95	68	0.634454	0.382353	0.684874	714	238	21	1	12	18	9	22	5	17	8	27	9	8	6	14	17	10	12	15	2	4	43.799	0.608	0	0	0	0	0	0	237	0	0	0	0	0	0	315
ASPO6_b2574	445	0.356383	0.852915	0	86	160	142	153	0.628466	0.421442	0.545287	1623	541	47	9	33	36	15	41	26	32	12	52	13	21	23	15	41	29	30	40	8	17	49.033	0.577	0	0	0	0	0	0	540	268	9	0.397598	0.000782	0.00287093	0.00287093	91
CUt3_b0574	64	0.0969332	1.07143	0	63	97	138	110	0.607843	0.455882	0.607843	1224	408	48	0	24	22	13	27	2	27	22	37	11	10	24	18	22	23	34	28	7	8	42.496	0.633	0	0	0	0	0	0	407	0	0	0	0	0	0	0
MINCYCtex_b0929	44	1.53858	2.15677	0	56	129	52	126	0.556474	0.385675	0.490358	1089	363	34	0	27	14	19	49	1	14	19	23	5	32	5	13	12	16	22	26	2	29	37.082	0.832	3	3	3	3	3	3	362	1	1	1	0	2.13e-05	2.13e-05	210
GPDDA3_b3449	105	0.110683	0.785986	0	38	49	90	71	0.612903	0.431452	0.649194	744	248	25	4	15	16	5	21	6	12	13	32	8	10	13	7	15	10	11	12	8	4	45.732	0.606	0	0	0	0	0	0	247	0	0	0	0	0	0	0
SULabcpp_b0764	254	0.0781778	0.842045	0	40	60	75	55	0.573913	0.482609	0.565217	690	230	24	2	4	9	15	20	1	18	3	36	6	1	12	3	17	16	14	19	6	3	45.175	0.559	1	1	0	0	0	0	229	7	11	0.314991	333000000	8.54e-05	8.54e-05	91
CUtex_b2215	64	0.0280042	1.90111	9	51	107	58	152	0.570652	0.377717	0.570652	1104	368	29	0	32	11	19	48	1	10	17	27	4	32	4	21	13	17	24	25	4	29	29.032	0.898	3	3	3	3	3	3	367	0	0	0	0	0	0	0
MANGLYCtex_b1377	49	0.0274733	0.683685	1	68	140	60	110	0.550265	0.399471	0.449735	1134	378	42	0	37	12	19	43	5	9	17	27	9	33	5	14	11	21	24	17	5	27	40.354	0.74	3	3	3	3	3	3	377	0	0	0	0	0	0	0
O16AP3pp_b2035	35	0.0578444	1.03782	0	99	163	70	57	0.33419	0.308483	0.326478	1167	389	18	7	8	8	37	15	6	44	16	47	14	17	6	10	9	37	22	35	5	27	49.109	0.428	0	0	0	0	0	0	388	0	0	0	0	0	0	0
PAPSR_b3781	625	0.0391972	0.941381	0	20	26	31	33	0.581818	0.363636	0.581818	330	110	12	2	11	5	4	9	1	9	10	13	2	4	5	3	1	3	6	5	2	2	38.428	0.781	1	1	1	1	1	0	109	28	10	0.359871	4e-05	0.00031	0.00031	91
MALtex_b1377	49	0.0274733	0.683685	1	68	140	60	110	0.550265	0.399471	0.449735	1134	378	42	0	37	12	19	43	5	9	17	27	9	33	5	14	11	21	24	17	5	27	40.354	0.74	3	3	3	3	3	3	377	3	11	0.315234	0.00165627	4.27e-05	4.27e-05	261
MALTTTRabcpp_b4035	138	0.557362	0.951593	0	68	82	118	104	0.682796	0.365591	0.596774	1116	372	28	3	17	26	11	28	10	21	15	40	11	13	20	22	24	17	14	43	2	6	47.748	0.646	12	12	12	12	12	12	371	0	0	0	0	0	0	0
GBBTNtex_b0241	57	0.045701	0.726706	0	70	118	72	92	0.502841	0.372159	0.465909	1056	352	31	0	31	14	21	37	1	14	25	23	9	27	3	17	12	21	24	16	3	22	46.295	0.669	3	3	3	3	3	3	351	0	0	0	0	0	0	0
THRtex_b2215	64	0.0280042	1.90111	9	51	107	58	152	0.570652	0.377717	0.570652	1104	368	29	0	32	11	19	48	1	10	17	27	4	32	4	21	13	17	24	25	4	29	29.032	0.898	3	3	3	3	3	3	367	2	11	0.314587	0	3.2e-05	3.2e-05	261
PYDXK_b1636	80	0.140823	0.659693	0	53	79	87	69	0.659722	0.388889	0.541667	864	288	34	5	9	20	7	21	14	16	11	28	9	9	14	15	11	11	12	30	3	8	43.936	0.658	0	0	0	0	0	0	287	1	1	1	0	2.13e-05	2.13e-05	294
LALALGLUtex_b0929	44	1.53858	2.15677	0	56	129	52	126	0.556474	0.385675	0.490358	1089	363	34	0	27	14	19	49	1	14	19	23	5	32	5	13	12	16	22	26	2	29	37.082	0.832	3	3	3	3	3	3	362	0	0	0	0	0	0	0
HXAND_b2868	317	0.0190458	0.631741	1	40	37	44	39	0.5625	0.48125	0.51875	480	160	15	11	3	12	2	17	3	9	9	17	5	4	6	7	6	6	15	8	1	3	51.882	0.524	0	0	0	0	0	0	159	0	0	0	0	0	0	179
PSCLYSt2pp_b3370	14	0.262681	0.93643	2	53	100	125	168	0.515695	0.466368	0.656951	1338	446	54	8	10	9	28	38	3	42	16	56	14	11	22	7	10	33	32	28	11	13	48.524	0.61	0	0	0	0	0	0	445	0	0	0	0	0	0	0
GLYCLTtex_b2215	64	0.0280042	1.90111	9	51	107	58	152	0.570652	0.377717	0.570652	1104	368	29	0	32	11	19	48	1	10	17	27	4	32	4	21	13	17	24	25	4	29	29.032	0.898	3	3	3	3	3	3	367	3	11	0.31491	0.000829	4.27e-05	4.27e-05	261
LALALGLUtex_b0241	57	0.045701	0.726706	0	70	118	72	92	0.502841	0.372159	0.465909	1056	352	31	0	31	14	21	37	1	14	25	23	9	27	3	17	12	21	24	16	3	22	46.295	0.669	3	3	3	3	3	3	351	0	0	0	0	0	0	0
CRNtex_b1377	49	0.0274733	0.683685	1	68	140	60	110	0.550265	0.399471	0.449735	1134	378	42	0	37	12	19	43	5	9	17	27	9	33	5	14	11	21	24	17	5	27	40.354	0.74	3	3	3	3	3	3	377	0	0	0	0	0	0	0
FRUpts2pp_b2416	315	0.342568	1.34241	0	114	167	148	147	0.619792	0.357639	0.512153	1728	576	63	4	39	60	18	36	8	51	35	58	18	17	15	21	31	26	29	35	2	9	43.52	0.718	0	0	0	0	0	0	575	0	0	0	0	0	0	0
NO3R2bpp_b2206	103	0.404323	0.939987	0	120	162	275	272	0.604343	0.419783	0.659831	2487	829	78	12	45	54	38	65	17	32	55	64	22	38	49	33	48	35	41	54	20	28	37.426	0.766	0	0	0	0	0	0	828	0	0	0	0	0	0	0
PEAMNOpp_b1386	62	0.237482	0.689356	4	128	215	192	223	0.584433	0.386544	0.547493	2274	758	62	0	58	39	26	57	20	44	50	49	23	39	48	28	28	29	51	62	17	27	47.397	0.667	0	0	0	0	0	0	757	0	0	0	0	0	0	0
GMPR_b0104	48	0.336945	0.698894	0	59	107	80	102	0.583333	0.433908	0.522989	1044	348	31	7	16	25	16	37	8	18	20	25	11	12	9	8	17	25	22	31	3	6	43.131	0.705	1	1	1	1	1	1	347	0	0	0	0	0	0	160
ADEtex_b0241	57	0.045701	0.726706	0	70	118	72	92	0.502841	0.372159	0.465909	1056	352	31	0	31	14	21	37	1	14	25	23	9	27	3	17	12	21	24	16	3	22	46.295	0.669	3	3	3	3	3	3	351	3	11	0.314667	0	4.27e-05	4.27e-05	261
AGt3_b0573	67	0.383572	1.23527	0	23	29	27	32	0.504505	0.324324	0.531532	333	111	9	0	4	6	6	5	5	9	9	6	6	5	4	9	1	7	9	9	1	0	41.235	0.736	0	0	0	0	0	0	110	0	0	0	0	0	0	0
DOXRBCNtex_b1377	49	0.0274733	0.683685	1	68	140	60	110	0.550265	0.399471	0.449735	1134	378	42	0	37	12	19	43	5	9	17	27	9	33	5	14	11	21	24	17	5	27	40.354	0.74	3	3	3	3	3	3	377	1	1	1	0	2.13e-05	2.13e-05	92
TMAOtex_b0241	57	0.045701	0.726706	0	70	118	72	92	0.502841	0.372159	0.465909	1056	352	31	0	31	14	21	37	1	14	25	23	9	27	3	17	12	21	24	16	3	22	46.295	0.669	3	3	3	3	3	3	351	0	0	0	0	0	0	0
PACALDtex_b2215	64	0.0280042	1.90111	9	51	107	58	152	0.570652	0.377717	0.570652	1104	368	29	0	32	11	19	48	1	10	17	27	4	32	4	21	13	17	24	25	4	29	29.032	0.898	3	3	3	3	3	3	367	0	0	0	0	0	0	0
NTD6pp_b0480	71	0.26015	0.883051	0	100	142	176	133	0.597096	0.368421	0.560799	1653	551	48	2	38	35	19	50	10	28	41	44	16	27	26	28	20	21	29	40	7	21	41.884	0.666	0	0	0	0	0	0	550	0	0	0	0	0	0	0
SPODMpp_b1646	105	0.074999	0.944934	0	41	51	33	49	0.666667	0.448276	0.471264	522	174	20	2	11	10	3	24	7	7	14	15	4	5	10	6	3	11	8	12	0	1	42.691	0.625	0	0	0	0	0	0	173	0	0	0	0	0	0	0
SO3tex_b1377	49	0.0274733	0.683685	1	68	140	60	110	0.550265	0.399471	0.449735	1134	378	42	0	37	12	19	43	5	9	17	27	9	33	5	14	11	21	24	17	5	27	40.354	0.74	3	3	3	3	3	3	377	0	0	0	0	0	0	0
PROtex_b2215	64	0.0280042	1.90111	9	51	107	58	152	0.570652	0.377717	0.570652	1104	368	29	0	32	11	19	48	1	10	17	27	4	32	4	21	13	17	24	25	4	29	29.032	0.898	3	3	3	3	3	3	367	3	11	0.315072	0.00124322	4.27e-05	4.27e-05	261
DCAtex_b0929	44	1.53858	2.15677	0	56	129	52	126	0.556474	0.385675	0.490358	1089	363	34	0	27	14	19	49	1	14	19	23	5	32	5	13	12	16	22	26	2	29	37.082	0.832	3	3	3	3	3	3	362	0	0	0	0	0	0	0
ARBTptspp_b2415	225	0.0245069	1.24341	4	18	22	22	24	0.593023	0.395349	0.534884	258	86	9	0	1	9	4	6	2	3	7	8	2	2	2	6	1	6	10	7	0	0	38.988	0.805	1	1	1	0	0	0	85	0	0	0	0	0	0	0
2AGPGAT140_b2836	53	0.183582	0.630585	1	136	179	211	194	0.611111	0.405556	0.5625	2160	720	55	4	30	45	36	55	16	39	38	78	23	13	41	27	51	33	44	61	8	22	47.712	0.603	0	0	0	0	0	0	719	4	12	0.138481	0.00170373	5.34e-05	5.34e-05	197
GAMtex_b0929	44	1.53858	2.15677	0	56	129	52	126	0.556474	0.385675	0.490358	1089	363	34	0	27	14	19	49	1	14	19	23	5	32	5	13	12	16	22	26	2	29	37.082	0.832	3	3	3	3	3	3	362	0	0	0	0	0	0	0
PROGLYtex_b0241	57	0.045701	0.726706	0	70	118	72	92	0.502841	0.372159	0.465909	1056	352	31	0	31	14	21	37	1	14	25	23	9	27	3	17	12	21	24	16	3	22	46.295	0.669	3	3	3	3	3	3	351	0	0	0	0	0	0	0
S2FE2SS_b3807	97	0.133905	0.576409	0	16	21	29	41	0.598131	0.364486	0.654206	321	107	5	2	12	10	5	9	3	8	3	10	1	4	1	7	5	5	7	3	5	1	35.389	0.785	0	0	0	0	0	0	106	272	9	0.398115	0.000782	0.00291362	0.00291362	91
ALLtex_b0929	44	1.53858	2.15677	0	56	129	52	126	0.556474	0.385675	0.490358	1089	363	34	0	27	14	19	49	1	14	19	23	5	32	5	13	12	16	22	26	2	29	37.082	0.832	3	3	3	3	3	3	362	0	0	0	0	0	0	0
DIMPtex_b0929	44	1.53858	2.15677	0	56	129	52	126	0.556474	0.385675	0.490358	1089	363	34	0	27	14	19	49	1	14	19	23	5	32	5	13	12	16	22	26	2	29	37.082	0.832	3	3	3	3	3	3	362	0	0	0	0	0	0	0
CS_b0720	387	0.470618	1.75746	5	61	125	112	130	0.556075	0.399533	0.565421	1284	428	37	7	27	26	22	28	15	28	23	35	19	17	19	8	24	25	28	20	3	16	39.164	0.78	0	0	0	0	0	0	427	0	0	0	0	0	0	22
ALAtex_b0929	44	1.53858	2.15677	0	56	129	52	126	0.556474	0.385675	0.490358	1089	363	34	0	27	14	19	49	1	14	19	23	5	32	5	13	12	16	22	26	2	29	37.082	0.832	3	3	3	3	3	3	362	2	11	0.314587	0	3.2e-05	3.2e-05	261
3AMPtex_b2215	64	0.0280042	1.90111	9	51	107	58	152	0.570652	0.377717	0.570652	1104	368	29	0	32	11	19	48	1	10	17	27	4	32	4	21	13	17	24	25	4	29	29.032	0.898	3	3	3	3	3	3	367	0	0	0	0	0	0	0
MECDPDH5_b2895	87	0.0369536	0.914535	0	29	38	50	57	0.597701	0.327586	0.614943	522	174	9	2	16	16	6	16	3	10	8	22	6	5	6	8	2	7	8	8	6	9	43.106	0.664	1	1	1	1	1	1	173	336	9	0.424022	0.000798	0.00359666	0.00359666	91
CYStex_b2215	64	0.0280042	1.90111	9	51	107	58	152	0.570652	0.377717	0.570652	1104	368	29	0	32	11	19	48	1	10	17	27	4	32	4	21	13	17	24	25	4	29	29.032	0.898	3	3	3	3	3	3	367	2	11	0.314587	0	3.2e-05	3.2e-05	261
URAtex_b0241	57	0.045701	0.726706	0	70	118	72	92	0.502841	0.372159	0.465909	1056	352	31	0	31	14	21	37	1	14	25	23	9	27	3	17	12	21	24	16	3	22	46.295	0.669	3	3	3	3	3	3	351	2	2	0.75	0	3.2e-05	3.2e-05	1
CRNCDH_b0036	73	0.048316	0.808497	2	53	66	72	71	0.641221	0.435115	0.545802	786	262	36	1	14	22	13	23	3	16	11	25	7	10	15	4	15	13	8	17	3	5	39.759	0.667	2	2	2	2	2	1	261	0	0	0	0	0	0	0
ARGabcpp_b0860	57	0.851708	1.5983	10	53	80	49	62	0.516393	0.372951	0.454918	732	244	25	2	16	11	14	16	3	15	22	17	4	13	10	12	5	13	18	15	2	10	43.675	0.685	3	3	3	3	3	3	243	1	13	0.195002	0	2.13e-05	2.13e-05	261
NTRIR3pp_b4071	54	0.0809899	0.995382	0	31	42	61	55	0.571429	0.433862	0.613757	567	189	13	10	11	7	3	9	11	4	10	15	6	11	15	13	7	14	11	14	2	2	45.678	0.636	0	0	0	0	0	0	188	0	0	0	0	0	0	0
PLIPA1A181pp_b3821	101	0.0282509	0.656571	0	38	73	92	87	0.524138	0.396552	0.617241	870	290	18	0	16	15	10	23	5	9	10	29	8	20	13	12	13	19	18	18	10	23	46.721	0.641	0	0	0	0	0	0	289	3	10	0.174601	0	4.27e-05	4.27e-05	198
LYSabcpp_b2308	71	0.00585743	0.723383	0	26	62	79	62	0.558952	0.401747	0.615721	687	229	19	1	5	8	15	27	1	20	6	30	8	5	6	7	10	11	15	23	2	9	52.261	0.58	0	0	0	0	0	0	228	1	13	0.194506	0	2.13e-05	2.13e-05	261
DKGLCNR2y_b3553	279	0.313369	1.12824	0	76	69	82	98	0.621538	0.384615	0.553846	975	325	40	4	18	22	11	19	14	15	13	36	10	15	13	11	14	14	19	28	2	6	50.321	0.588	0	0	0	0	0	0	324	0	0	0	0	0	0	0
RIBabcpp_b4088	30	0.0187901	0.795699	0	73	84	64	91	0.567308	0.391026	0.496795	936	312	43	1	19	16	11	27	0	17	29	25	10	17	10	10	6	17	15	29	3	6	46.459	0.652	0	0	0	0	0	0	311	0	0	0	0	0	0	0
NTD5_b2744	420	0.227363	0.722778	0	37	82	73	62	0.637795	0.472441	0.531496	762	254	24	5	21	6	5	25	7	14	5	23	4	11	17	9	15	14	17	23	3	5	42.933	0.589	0	0	0	0	0	0	253	0	0	0	0	0	0	248
CD2t3pp_b0752	222	0.146517	0.843698	2	50	87	100	77	0.636943	0.39172	0.563694	942	314	32	3	12	16	9	20	25	21	4	45	11	9	14	7	16	17	14	27	7	4	55.159	0.539	0	0	0	0	0	0	313	1	2	0.666667	0	2.13e-05	2.13e-05	62
MELIBt3ipp_b1528	44	0.246161	0.917234	0	64	98	135	100	0.516373	0.43073	0.59194	1191	397	50	3	3	7	24	30	7	37	7	60	16	8	13	12	13	30	23	36	9	8	49.776	0.519	0	0	0	0	0	0	396	1	1	1	0	2.13e-05	2.13e-05	205
FDMO_b0935	124	0.0118936	0.703392	0	68	93	119	102	0.688482	0.442408	0.578534	1146	382	46	1	20	25	14	32	11	17	10	41	4	11	23	21	26	18	17	28	6	10	49.048	0.566	0	0	0	0	0	0	381	0	0	0	0	0	0	0
HSST_b4013	170	0.438989	1.44357	2	44	95	95	76	0.596774	0.351613	0.551613	930	310	21	2	22	20	17	11	11	16	9	36	4	19	21	14	17	14	18	18	5	14	49.07	0.608	0	0	0	0	0	0	309	186	10	0.377388	4.38e-05	0.00199577	0.00199577	91
PDX5POi_b1638	357	0.137093	0.790793	0	35	65	59	60	0.625571	0.388128	0.543379	657	219	13	1	11	17	10	13	8	9	12	24	5	5	10	15	20	14	7	12	6	6	42.766	0.634	0	0	0	0	0	0	218	270	9	0.414552	0.000784	0.00289227	0.00289227	91
PROabcpp_b2677	196	0.0883796	1.01255	0	96	109	95	101	0.618454	0.36409	0.488778	1203	401	36	1	27	29	13	32	6	31	20	45	13	14	15	21	27	20	14	28	0	8	47.863	0.524	18	18	18	18	18	17	400	1	13	0.193492	0	2.13e-05	2.13e-05	261
DTMPtex_b0241	57	0.045701	0.726706	0	70	118	72	92	0.502841	0.372159	0.465909	1056	352	31	0	31	14	21	37	1	14	25	23	9	27	3	17	12	21	24	16	3	22	46.295	0.669	3	3	3	3	3	3	351	0	0	0	0	0	0	0
ALAabcpp_b3460	71	1.56055	1.99746	12	66	72	122	108	0.611413	0.396739	0.625	1104	368	49	3	26	17	11	36	4	22	31	27	7	16	15	20	7	15	18	27	3	13	37.233	0.73	1	1	1	1	1	1	367	1	13	0.193615	0	2.13e-05	2.13e-05	261
2AGPG160tipp_b2835	60	0.122308	0.614945	0	50	93	149	106	0.580402	0.444724	0.640704	1194	398	57	4	4	9	20	43	4	26	12	57	14	16	14	10	10	22	18	38	9	10	50.482	0.583	0	0	0	0	0	0	397	4	10	0.182863	1.74e-05	5.34e-05	5.34e-05	198
PItex_b0929	44	1.53858	2.15677	0	56	129	52	126	0.556474	0.385675	0.490358	1089	363	34	0	27	14	19	49	1	14	19	23	5	32	5	13	12	16	22	26	2	29	37.082	0.832	3	3	3	3	3	3	362	172	10	0.37646	0.000218	0.00184636	0.00184636	91
HACD5_b2341	124	0.0138785	1.06552	4	141	202	204	168	0.61958	0.427972	0.52028	2145	715	75	9	30	44	24	69	13	52	40	68	16	20	38	35	44	32	37	53	2	13	52.384	0.575	4	4	4	4	4	2	714	3	1	1	0	4.27e-05	4.27e-05	174
NNDPR_b0109	491	0.218498	0.526527	0	67	65	67	99	0.647651	0.389262	0.557047	894	298	26	2	20	26	9	22	7	14	12	36	4	16	9	8	21	14	19	26	3	3	45.377	0.576	0	0	0	0	0	0	297	336	9	0.424022	0.000798	0.00359666	0.00359666	91
ATPS4rpp_b3738	158	0.110533	1.21887	1	38	57	100	77	0.529412	0.327206	0.650735	816	272	17	0	8	8	20	17	7	25	10	45	11	12	15	7	4	17	12	23	7	6	45.273	0.675	0	0	0	0	0	0	271	0	0	0	0	0	0	60
4PEPTtex_b0241	57	0.045701	0.726706	0	70	118	72	92	0.502841	0.372159	0.465909	1056	352	31	0	31	14	21	37	1	14	25	23	9	27	3	17	12	21	24	16	3	22	46.295	0.669	3	3	3	3	3	3	351	37	11	0.325798	0.00130784	0.000406	0.000406	306
DALAtex_b1377	49	0.0274733	0.683685	1	68	140	60	110	0.550265	0.399471	0.449735	1134	378	42	0	37	12	19	43	5	9	17	27	9	33	5	14	11	21	24	17	5	27	40.354	0.74	3	3	3	3	3	3	377	10	11	0.321269	2.78e-05	0.000117	0.000117	306
DMSOR2_b0896	49	0.178473	0.890793	0	45	65	108	70	0.583333	0.4375	0.618056	864	288	31	3	4	5	14	31	4	18	4	46	18	4	11	8	9	21	9	30	11	6	47.117	0.599	1	1	1	1	1	1	287	0	0	0	0	0	0	0
FACOAL180t2pp_b1805	265	0.429143	1.31904	0	95	148	182	137	0.6121	0.355872	0.567616	1686	562	38	4	29	34	20	43	12	24	32	65	15	27	34	24	26	23	27	59	4	21	47.219	0.627	0	0	0	0	0	0	561	24	8	0.273133	0.0261772	0.000267	0.000267	198
MELIBtex_b2215	64	0.0280042	1.90111	9	51	107	58	152	0.570652	0.377717	0.570652	1104	368	29	0	32	11	19	48	1	10	17	27	4	32	4	21	13	17	24	25	4	29	29.032	0.898	3	3	3	3	3	3	367	0	0	0	0	0	0	0
AOXSr2_b0776	182	0.374026	0.654257	0	58	98	128	101	0.672727	0.472727	0.594805	1155	385	53	5	20	17	11	32	12	16	7	44	8	8	14	27	28	29	14	25	7	7	46.778	0.597	1	1	1	1	1	1	384	303	9	0.420096	0.00129598	0.00324447	0.00324447	91
GTHRDabcpp_b0829	310	0.0266724	0.665948	0	110	167	211	136	0.660256	0.403846	0.55609	1872	624	60	4	26	42	17	41	17	41	15	71	20	14	35	43	52	36	21	54	3	11	48.601	0.56	24	24	24	24	22	19	623	1	13	0.194785	0	2.13e-05	2.13e-05	261
NI2abcpp_b3469	302	0.316471	1.06124	0	130	151	250	202	0.656207	0.474761	0.616644	2199	733	119	9	28	47	18	59	9	45	25	91	13	21	30	26	41	35	49	55	6	6	46.137	0.614	0	0	0	0	0	0	732	0	0	0	0	0	0	238
PYDXNtex_b0929	44	1.53858	2.15677	0	56	129	52	126	0.556474	0.385675	0.490358	1089	363	34	0	27	14	19	49	1	14	19	23	5	32	5	13	12	16	22	26	2	29	37.082	0.832	3	3	3	3	3	3	362	0	0	0	0	0	0	0
LALALGLUtpp_b4130	28	0.0322248	0.90449	0	80	129	137	140	0.539095	0.423868	0.569959	1458	486	61	7	14	11	32	41	9	38	8	67	20	14	11	19	19	31	23	32	13	15	50.2	0.572	1	1	1	1	1	1	485	0	0	0	0	0	0	0
FACOAL160t2pp_b1805	265	0.429143	1.31904	0	95	148	182	137	0.6121	0.355872	0.567616	1686	562	38	4	29	34	20	43	12	24	32	65	15	27	34	24	26	23	27	59	4	21	47.219	0.627	0	0	0	0	0	0	561	17	9	0.219338	0.0096141	0.000192	0.000192	198
TMAOR1_b0896	49	0.178473	0.890793	0	45	65	108	70	0.583333	0.4375	0.618056	864	288	31	3	4	5	14	31	4	18	4	46	18	4	11	8	9	21	9	30	11	6	47.117	0.599	1	1	1	1	1	1	287	0	0	0	0	0	0	0
DSBDR_b3781	625	0.0391972	0.941381	0	20	26	31	33	0.581818	0.363636	0.581818	330	110	12	2	11	5	4	9	1	9	10	13	2	4	5	3	1	3	6	5	2	2	38.428	0.781	1	1	1	1	1	0	109	0	0	0	0	0	0	0
COBALT2tpp_b3040	69	0.108139	0.729887	0	53	59	87	59	0.589147	0.437984	0.565891	774	258	34	1	4	8	11	30	4	21	6	42	15	7	15	5	4	18	9	17	2	4	45.75	0.495	0	0	0	0	0	0	257	158	10	0.325885	0.00167624	0.00169694	0.00169694	91
NADH16pp_b2283	73	0.223309	1.07442	0	127	221	263	298	0.639164	0.435644	0.617162	2727	909	97	16	55	57	32	75	26	45	31	69	22	38	41	44	63	48	43	65	12	29	38.287	0.75	0	0	0	0	0	0	908	1	10	0.295894	0	2.13e-05	2.13e-05	302
SO3tex_b0241	57	0.045701	0.726706	0	70	118	72	92	0.502841	0.372159	0.465909	1056	352	31	0	31	14	21	37	1	14	25	23	9	27	3	17	12	21	24	16	3	22	46.295	0.669	3	3	3	3	3	3	351	0	0	0	0	0	0	0
AM3PA_b0110	228	0.19693	0.795025	0	27	62	53	42	0.63587	0.461957	0.516304	552	184	17	5	16	9	8	13	7	11	4	14	2	3	14	8	13	6	12	11	4	6	53.313	0.594	0	0	0	0	0	0	183	6	3	0.538462	3.09e-06	7.47e-05	7.47e-05	32
MDDEP4pp_b3182	70	0.0407299	0.377247	0	76	130	134	138	0.587866	0.437238	0.569038	1434	478	54	5	27	11	19	37	7	28	18	44	14	21	24	31	26	32	27	33	4	15	52.627	0.56	0	0	0	0	0	0	477	11	11	0.251799	0	0.000128	0.000128	306
SSALy_b2661	298	0.114739	1.12882	1	63	82	144	194	0.623188	0.426501	0.699793	1449	483	66	6	27	33	21	47	5	31	29	42	9	23	20	15	23	18	21	31	5	10	35.046	0.706	5	5	5	5	5	5	482	2	10	0.296037	0	3.2e-05	3.2e-05	302
ARGabcpp_b0863	54	0.0363355	0.279425	0	43	56	65	80	0.553279	0.360656	0.594262	732	244	22	2	18	12	13	17	2	13	22	18	4	11	8	15	6	10	21	18	2	9	37.802	0.763	2	2	2	2	2	2	243	1	13	0.195002	0	2.13e-05	2.13e-05	261
LYSabcpp_b2307	75	0.0323296	0.987161	0	31	69	71	68	0.48954	0.41841	0.58159	717	239	24	3	3	9	16	13	5	23	7	33	3	6	9	4	12	14	19	16	5	14	49.333	0.6	0	0	0	0	0	0	238	1	13	0.194506	0	2.13e-05	2.13e-05	261
CYSDtex_b0241	57	0.045701	0.726706	0	70	118	72	92	0.502841	0.372159	0.465909	1056	352	31	0	31	14	21	37	1	14	25	23	9	27	3	17	12	21	24	16	3	22	46.295	0.669	3	3	3	3	3	3	351	0	0	0	0	0	0	0
DSERDHr_b1539	247	0.0100853	0.82028	0	44	79	63	63	0.598394	0.413655	0.506024	747	249	23	2	11	17	6	23	7	14	8	21	8	16	8	9	14	9	19	22	5	6	40.515	0.66	0	0	0	0	0	0	248	2	1	1	0	3.2e-05	3.2e-05	199
ICL_b4015	199	0.321122	1.57811	4	72	97	139	127	0.613793	0.434483	0.611494	1305	435	56	5	23	27	19	35	8	20	21	33	10	12	17	29	16	25	27	26	8	17	38.775	0.742	0	0	0	0	0	0	434	3	10	0.305486	0	4.27e-05	4.27e-05	302
DMStex_b0929	44	1.53858	2.15677	0	56	129	52	126	0.556474	0.385675	0.490358	1089	363	34	0	27	14	19	49	1	14	19	23	5	32	5	13	12	16	22	26	2	29	37.082	0.832	3	3	3	3	3	3	362	0	0	0	0	0	0	0
MANGLYCptspp_b0731	67	0.0984822	0.951865	1	107	174	215	163	0.603945	0.459788	0.573596	1977	659	90	6	19	33	27	66	11	34	22	85	20	23	27	17	25	37	42	48	10	16	49.159	0.56	1	1	1	1	1	1	658	0	0	0	0	0	0	0
PLIPA2E180pp_b3821	101	0.0282509	0.656571	0	38	73	92	87	0.524138	0.396552	0.617241	870	290	18	0	16	15	10	23	5	9	10	29	8	20	13	12	13	19	18	18	10	23	46.721	0.641	0	0	0	0	0	0	289	3	9	0.215101	0.000594	4.27e-05	4.27e-05	198
NO3R2pp_b1225	75	0.113832	1.23705	0	74	117	162	160	0.576998	0.407407	0.62768	1539	513	37	17	31	37	18	36	9	29	35	40	15	23	33	19	30	23	23	26	9	22	34.693	0.784	3	3	3	3	3	1	512	0	0	0	0	0	0	0
APCS_b0121	201	0.0248158	1.39053	0	46	80	61	102	0.591696	0.366782	0.564014	867	289	26	6	20	15	18	21	15	18	9	21	7	11	10	16	11	14	16	19	2	13	44.106	0.692	0	0	0	0	0	0	288	0	0	0	0	0	0	0
MSO3tex_b1377	49	0.0274733	0.683685	1	68	140	60	110	0.550265	0.399471	0.449735	1134	378	42	0	37	12	19	43	5	9	17	27	9	33	5	14	11	21	24	17	5	27	40.354	0.74	3	3	3	3	3	3	377	0	0	0	0	0	0	0
NO3R2pp_b1465	57	0.143159	0.767187	0	27	46	87	67	0.488987	0.414097	0.678414	681	227	12	3	5	3	18	20	5	18	3	29	12	4	8	9	15	15	13	15	8	11	51.594	0.555	1	1	1	1	1	1	226	0	0	0	0	0	0	0
UACGAMPpp_b0480	71	0.26015	0.883051	0	100	142	176	133	0.597096	0.368421	0.560799	1653	551	48	2	38	35	19	50	10	28	41	44	16	27	26	28	20	21	29	40	7	21	41.884	0.666	0	0	0	0	0	0	550	0	0	0	0	0	0	0
SSALx_b1525	207	0.427615	0.861377	0	93	138	142	90	0.637149	0.453564	0.50108	1389	463	74	7	22	32	17	41	8	28	19	38	15	19	19	19	25	14	22	27	7	9	45.802	0.63	0	0	0	0	0	0	462	1	11	0.228502	0	2.13e-05	2.13e-05	302
S2FE2SS2_b1681	47	0.201335	0.975905	1	80	94	137	113	0.620283	0.389151	0.589623	1272	424	44	3	21	25	15	29	23	21	15	49	6	24	13	29	24	23	25	24	3	7	43.261	0.61	0	0	0	0	0	0	423	272	9	0.398115	0.000782	0.00291362	0.00291362	91
ACGALtex_b0929	44	1.53858	2.15677	0	56	129	52	126	0.556474	0.385675	0.490358	1089	363	34	0	27	14	19	49	1	14	19	23	5	32	5	13	12	16	22	26	2	29	37.082	0.832	3	3	3	3	3	3	362	0	0	0	0	0	0	0
MOCOS_b0827	333	0.0484977	0.55279	0	71	100	120	121	0.650485	0.456311	0.584951	1236	412	37	6	19	27	19	43	5	20	10	43	8	13	24	19	24	25	25	35	4	5	43.082	0.638	0	0	0	0	0	0	411	336	9	0.424022	0.000798	0.00359666	0.00359666	91
PROGLYabcpp_b3544	96	0.617704	1.94919	1	98	110	156	172	0.56903	0.365672	0.61194	1608	536	45	4	36	32	21	34	9	21	46	39	18	23	31	26	18	29	26	41	9	27	37.723	0.757	0	0	0	0	0	0	535	0	0	0	0	0	0	0
CLPNS160pp_b1249	74	0.0880751	0.417833	0	78	134	139	136	0.574949	0.410678	0.564682	1461	487	51	5	26	22	18	31	10	37	16	60	24	12	21	16	35	25	19	30	13	15	50.55	0.55	0	0	0	0	0	0	486	27	10	0.30872	0.000831	0.000299	0.000299	306
MPTS_b0785	332	0.0894715	0.597645	0	28	33	45	45	0.655629	0.450331	0.596026	453	151	15	0	8	16	6	12	4	6	6	8	3	4	8	4	12	6	9	14	6	3	38.068	0.691	0	0	0	0	0	0	150	336	9	0.424022	0.000798	0.00359666	0.00359666	91
IDONtex_b0929	44	1.53858	2.15677	0	56	129	52	126	0.556474	0.385675	0.490358	1089	363	34	0	27	14	19	49	1	14	19	23	5	32	5	13	12	16	22	26	2	29	37.082	0.832	3	3	3	3	3	3	362	3	11	0.314667	0	4.27e-05	4.27e-05	261
ASPO3_b2574	445	0.356383	0.852915	0	86	160	142	153	0.628466	0.421442	0.545287	1623	541	47	9	33	36	15	41	26	32	12	52	13	21	23	15	41	29	30	40	8	17	49.033	0.577	0	0	0	0	0	0	540	268	9	0.397598	0.000782	0.00287093	0.00287093	91
HYD3pp_b2997	72	0.472132	1.22809	0	64	103	83	123	0.627346	0.450402	0.552279	1119	373	38	13	13	26	9	44	17	21	18	26	6	19	21	11	15	16	17	29	4	9	42.937	0.689	1	1	1	1	1	1	372	2	13	0.194785	0.00496475	3.2e-05	3.2e-05	261
BTS5_b0775	311	0.872288	0.905508	0	66	56	133	92	0.610951	0.40634	0.648415	1041	347	32	8	19	25	10	21	5	10	16	39	14	14	18	24	20	15	24	19	2	11	40.988	0.625	1	0	0	0	0	0	346	303	9	0.420096	0.00129598	0.00324447	0.00324447	91
CGLYtex_b0929	44	1.53858	2.15677	0	56	129	52	126	0.556474	0.385675	0.490358	1089	363	34	0	27	14	19	49	1	14	19	23	5	32	5	13	12	16	22	26	2	29	37.082	0.832	3	3	3	3	3	3	362	3	11	0.315234	0.00122116	4.27e-05	4.27e-05	261
TREptspp_b2416	315	0.342568	1.34241	0	114	167	148	147	0.619792	0.357639	0.512153	1728	576	63	4	39	60	18	36	8	51	35	58	18	17	15	21	31	26	29	35	2	9	43.52	0.718	0	0	0	0	0	0	575	0	0	0	0	0	0	0
PTRCTA_b3073	137	0.317727	1.39232	0	77	93	156	134	0.613043	0.415217	0.630435	1380	460	54	9	15	34	24	39	9	20	24	54	13	20	23	18	20	19	26	29	1	8	47.901	0.598	1	1	1	1	1	1	459	1	1	1	0	2.13e-05	2.13e-05	13
EDTXS4_b1855	62	0.180421	0.564862	0	63	89	108	64	0.601852	0.41358	0.530864	972	324	28	2	16	22	16	21	8	21	18	24	14	10	25	12	31	9	11	17	7	11	46.967	0.599	0	0	0	0	0	0	323	13	11	0.318844	8.5e-06	0.000149	0.000149	306
ALAR_b1190	89	0.379633	1.03382	1	44	84	137	92	0.633053	0.464986	0.641457	1071	357	42	4	16	19	6	33	10	21	9	35	12	10	16	16	24	16	22	27	9	9	46.451	0.564	1	1	1	1	1	1	356	158	10	0.326406	6.73e-05	0.00169694	0.00169694	91
TMAOR1_b0894	43	0.258452	0.808415	0	128	218	226	243	0.573006	0.433129	0.57546	2445	815	65	15	47	51	18	72	17	55	44	55	25	39	46	29	49	44	49	46	13	35	44.292	0.693	2	2	2	2	2	2	814	0	0	0	0	0	0	0
FECRMtonex_b0150	69	0.497418	1.30569	0	111	237	185	215	0.566845	0.435829	0.534759	2244	748	69	4	49	35	36	62	8	17	40	46	12	43	37	33	33	54	58	60	9	42	42.395	0.722	0	0	0	0	0	0	747	8	11	0.315072	3.39e-07	9.61e-05	9.61e-05	261
ADD_b3665	145	0.0519096	0.582017	0	89	155	160	185	0.633277	0.419355	0.585739	1767	589	65	11	31	37	19	48	22	38	12	62	13	25	28	30	30	35	26	39	4	13	46.648	0.6	1	0	0	0	0	0	588	45	11	0.325452	0.000102	0.000491	0.000491	306
XYLUtex_b0929	44	1.53858	2.15677	0	56	129	52	126	0.556474	0.385675	0.490358	1089	363	34	0	27	14	19	49	1	14	19	23	5	32	5	13	12	16	22	26	2	29	37.082	0.832	3	3	3	3	3	3	362	0	0	0	0	0	0	0
NTD6_b2744	420	0.227363	0.722778	0	37	82	73	62	0.637795	0.472441	0.531496	762	254	24	5	21	6	5	25	7	14	5	23	4	11	17	9	15	14	17	23	3	5	42.933	0.589	0	0	0	0	0	0	253	1	10	0.295894	0	2.13e-05	2.13e-05	302
PEAMNtex_b0929	44	1.53858	2.15677	0	56	129	52	126	0.556474	0.385675	0.490358	1089	363	34	0	27	14	19	49	1	14	19	23	5	32	5	13	12	16	22	26	2	29	37.082	0.832	3	3	3	3	3	3	362	0	0	0	0	0	0	0
G6PDA_b0678	201	0.085312	0.643404	0	47	79	62	79	0.569288	0.367041	0.52809	801	267	22	4	12	18	12	17	11	14	15	24	10	16	13	7	12	11	17	21	2	8	40.408	0.745	0	0	0	0	0	0	266	0	0	0	0	0	0	131
NADH17pp_b2276	201	0.182983	0.815464	0	45	99	185	157	0.604938	0.407407	0.703704	1458	486	55	1	11	9	25	45	7	30	8	87	19	13	21	11	14	37	16	46	9	21	42.571	0.671	0	0	0	0	0	0	485	0	0	0	0	0	0	224
GLCRt2rpp_b2789	34	0.107778	0.399798	0	51	108	152	140	0.507761	0.412417	0.64745	1353	451	38	3	9	11	35	53	5	45	16	37	20	15	15	13	14	32	17	43	14	15	49.649	0.644	2	2	2	2	2	2	450	0	0	0	0	0	0	0
HIStex_b0929	44	1.53858	2.15677	0	56	129	52	126	0.556474	0.385675	0.490358	1089	363	34	0	27	14	19	49	1	14	19	23	5	32	5	13	12	16	22	26	2	29	37.082	0.832	3	3	3	3	3	3	362	3	11	0.31491	0.000829	4.27e-05	4.27e-05	261
ALATA_L2_b0870	222	0.0943977	0.689047	0	54	76	93	111	0.652695	0.422156	0.610778	1002	334	47	4	20	22	8	25	8	16	13	35	11	15	11	11	23	12	15	23	4	10	46.2	0.626	0	0	0	0	0	0	333	1	2	0.666667	0	2.13e-05	2.13e-05	35
ETHAtex_b2215	64	0.0280042	1.90111	9	51	107	58	152	0.570652	0.377717	0.570652	1104	368	29	0	32	11	19	48	1	10	17	27	4	32	4	21	13	17	24	25	4	29	29.032	0.898	3	3	3	3	3	3	367	3	10	0.321438	0.000873	4.27e-05	4.27e-05	198
TARTRDtex_b0241	57	0.045701	0.726706	0	70	118	72	92	0.502841	0.372159	0.465909	1056	352	31	0	31	14	21	37	1	14	25	23	9	27	3	17	12	21	24	16	3	22	46.295	0.669	3	3	3	3	3	3	351	0	0	0	0	0	0	0
INSTtex_b0929	44	1.53858	2.15677	0	56	129	52	126	0.556474	0.385675	0.490358	1089	363	34	0	27	14	19	49	1	14	19	23	5	32	5	13	12	16	22	26	2	29	37.082	0.832	3	3	3	3	3	3	362	0	0	0	0	0	0	0
METSOXR2_b3781	625	0.0391972	0.941381	0	20	26	31	33	0.581818	0.363636	0.581818	330	110	12	2	11	5	4	9	1	9	10	13	2	4	5	3	1	3	6	5	2	2	38.428	0.781	1	1	1	1	1	0	109	6	11	0.316292	6.65e-05	7.47e-05	7.47e-05	261
LCTSt3ipp_b1528	44	0.246161	0.917234	0	64	98	135	100	0.516373	0.43073	0.59194	1191	397	50	3	3	7	24	30	7	37	7	60	16	8	13	12	13	30	23	36	9	8	49.776	0.519	0	0	0	0	0	0	396	1	1	1	0	2.13e-05	2.13e-05	193
RZ5PP_b0638	29	0.0160521	0.756532	0	38	60	50	56	0.627451	0.387255	0.519608	612	204	18	3	9	14	9	12	11	13	1	23	6	10	6	15	15	11	7	11	6	3	47.669	0.546	1	1	1	0	0	0	203	0	0	0	0	0	0	0
NAt3_2pp_b0019	263	0.448801	0.982192	0	59	115	128	87	0.570694	0.419023	0.552699	1167	389	49	3	10	9	18	36	8	40	11	64	10	9	15	6	14	24	13	33	8	8	53.009	0.565	0	0	0	0	0	0	388	0	0	0	0	0	0	231
IPMD_b0073	437	1.16882	1.62372	5	66	78	99	121	0.634615	0.425824	0.604396	1092	364	43	6	23	25	13	32	8	27	13	35	9	13	19	13	22	19	12	18	2	11	41.98	0.685	1	1	1	1	1	1	363	164	10	0.374618	0.000251	0.00176098	0.00176098	91
PLIPA2A140pp_b3821	101	0.0282509	0.656571	0	38	73	92	87	0.524138	0.396552	0.617241	870	290	18	0	16	15	10	23	5	9	10	29	8	20	13	12	13	19	18	18	10	23	46.721	0.641	0	0	0	0	0	0	289	2	12	0.138277	0	3.2e-05	3.2e-05	197
PPA2_b2744	420	0.227363	0.722778	0	37	82	73	62	0.637795	0.472441	0.531496	762	254	24	5	21	6	5	25	7	14	5	23	4	11	17	9	15	14	17	23	3	5	42.933	0.589	0	0	0	0	0	0	253	0	0	0	0	0	0	279
NO3R2pp_b1224	125	0.172636	2.4336	1	167	286	379	416	0.58734	0.423878	0.637019	3744	1248	97	12	75	77	36	106	36	56	66	103	37	59	60	52	67	74	74	69	38	53	39.001	0.764	2	1	1	1	1	1	1247	0	0	0	0	0	0	0
G3PD6_b2243	38	0.0866391	0.721064	0	74	75	114	134	0.559194	0.435768	0.624685	1191	397	30	18	20	20	12	25	8	20	27	41	6	15	23	15	23	19	30	26	5	13	42.794	0.657	0	0	0	0	0	0	396	0	0	0	0	0	0	129
DAMPtex_b1377	49	0.0274733	0.683685	1	68	140	60	110	0.550265	0.399471	0.449735	1134	378	42	0	37	12	19	43	5	9	17	27	9	33	5	14	11	21	24	17	5	27	40.354	0.74	3	3	3	3	3	3	377	0	0	0	0	0	0	0
XYLI2_b3565	153	0.0100078	0.817116	3	82	116	129	114	0.60771	0.367347	0.55102	1323	441	44	4	24	33	25	38	19	13	24	42	12	20	14	25	19	16	19	23	8	18	43.798	0.686	0	0	0	0	0	0	440	0	0	0	0	0	0	332
SUCOAS_b0728	506	0.789358	1.47511	3	78	94	99	118	0.681234	0.390746	0.557841	1167	389	47	5	21	28	11	43	5	23	24	38	8	16	14	17	17	8	15	38	3	7	38.382	0.783	0	0	0	0	0	0	388	0	0	0	0	0	0	310
SELtex_b0929	44	1.53858	2.15677	0	56	129	52	126	0.556474	0.385675	0.490358	1089	363	34	0	27	14	19	49	1	14	19	23	5	32	5	13	12	16	22	26	2	29	37.082	0.832	3	3	3	3	3	3	362	0	0	0	0	0	0	0
S2FE2SS_b1679	150	0.381418	0.852153	0	28	39	39	33	0.582734	0.359712	0.517986	417	139	13	2	8	9	4	6	1	12	6	16	5	5	6	12	10	7	3	7	3	3	48.052	0.579	0	0	0	0	0	0	138	272	9	0.398115	0.000782	0.00291362	0.00291362	91
FUCtex_b2215	64	0.0280042	1.90111	9	51	107	58	152	0.570652	0.377717	0.570652	1104	368	29	0	32	11	19	48	1	10	17	27	4	32	4	21	13	17	24	25	4	29	29.032	0.898	3	3	3	3	3	3	367	0	0	0	0	0	0	0
GLYCLTtex_b0241	57	0.045701	0.726706	0	70	118	72	92	0.502841	0.372159	0.465909	1056	352	31	0	31	14	21	37	1	14	25	23	9	27	3	17	12	21	24	16	3	22	46.295	0.669	3	3	3	3	3	3	351	3	11	0.31491	0.000829	4.27e-05	4.27e-05	261
PAPA140pp_b1278	82	0.0324914	0.618938	0	72	65	75	43	0.588235	0.466667	0.462745	765	255	29	2	3	15	11	15	6	16	10	32	5	3	13	11	18	10	15	21	17	2	55.788	0.485	0	0	0	0	0	0	254	2	2	0.75	0	3.2e-05	3.2e-05	4
FRUptspp_b2169	97	0.0941756	1.1169	1	69	92	110	106	0.68435	0.408488	0.572944	1131	377	55	0	29	21	9	32	7	15	17	48	8	16	8	21	15	18	24	29	2	2	42.692	0.663	1	1	1	1	1	1	376	0	0	0	0	0	0	0
MALTHXabcpp_b4033	85	0.178354	0.760441	0	67	101	163	184	0.526214	0.398058	0.673786	1545	515	44	3	21	15	34	46	1	31	23	68	16	24	21	22	16	24	39	31	12	23	41.906	0.649	1	0	0	0	0	0	514	0	0	0	0	0	0	0
NI2uabcpp_b3479	10	0.00364036	1.22881	0	42	41	92	80	0.658824	0.443137	0.67451	765	255	34	4	12	12	4	20	7	14	8	33	13	5	13	12	12	13	16	20	0	2	42.103	0.618	6	6	6	6	6	4	254	0	0	0	0	0	0	240
GLYALDtex_b2215	64	0.0280042	1.90111	9	51	107	58	152	0.570652	0.377717	0.570652	1104	368	29	0	32	11	19	48	1	10	17	27	4	32	4	21	13	17	24	25	4	29	29.032	0.898	3	3	3	3	3	3	367	5	11	0.31491	1.28e-06	6.4e-05	6.4e-05	261
MPTG2_b3396	204	0.0245856	0.567549	0	123	195	297	236	0.609871	0.430082	0.626322	2553	851	88	4	41	42	29	70	10	48	32	63	21	40	48	58	46	46	49	65	14	36	43.186	0.662	2	2	1	1	1	1	850	37	10	0.314587	4.54e-05	0.000406	0.000406	306
12PPDStex_b0241	57	0.045701	0.726706	0	70	118	72	92	0.502841	0.372159	0.465909	1056	352	31	0	31	14	21	37	1	14	25	23	9	27	3	17	12	21	24	16	3	22	46.295	0.669	3	3	3	3	3	3	351	5	11	0.315153	0.000206	6.4e-05	6.4e-05	261
BMOGDS2_b3857	129	0.0333441	0.590415	0	48	60	52	35	0.666667	0.389744	0.446154	585	195	19	2	12	12	5	15	8	6	7	22	7	8	11	9	12	5	7	19	4	4	50.205	0.536	0	0	0	0	0	0	194	336	9	0.424022	0.000798	0.00359666	0.00359666	91
MDDCP2pp_b2010	43	0.359791	0.829301	0	64	134	105	86	0.586118	0.401028	0.491003	1167	389	32	1	25	23	14	33	16	22	20	35	10	15	13	16	22	25	21	26	8	11	51.584	0.584	2	2	2	2	2	2	388	37	10	0.314587	4.54e-05	0.000406	0.000406	306
MANptspp_b2416	315	0.342568	1.34241	0	114	167	148	147	0.619792	0.357639	0.512153	1728	576	63	4	39	60	18	36	8	51	35	58	18	17	15	21	31	26	29	35	2	9	43.52	0.718	0	0	0	0	0	0	575	0	0	0	0	0	0	0
FACOAE140_b0452	204	0.111435	0.81707	0	49	82	83	73	0.637631	0.393728	0.543554	861	287	22	1	12	19	16	21	12	12	10	31	5	11	20	16	16	20	10	21	3	8	48.274	0.628	0	0	0	0	0	0	286	1	10	0.306327	0	2.13e-05	2.13e-05	306
GALCTLO_b4358	55	0.00977459	0.591075	0	66	106	99	70	0.604106	0.42522	0.495601	1023	341	39	8	16	20	13	32	9	26	16	24	8	14	19	17	15	13	16	28	2	5	47.56	0.598	0	0	0	0	0	0	340	0	0	0	0	0	0	0
CUt3_b0572	124	0.762781	1.3275	1	90	120	143	105	0.582969	0.412664	0.541485	1374	458	58	3	17	23	17	24	3	20	12	58	7	32	13	43	26	41	20	21	3	16	46.363	0.559	0	0	0	0	0	0	457	0	0	0	0	0	0	0
TDPDRR_b2040	286	0.0376277	1.06942	1	86	100	56	58	0.583333	0.433333	0.38	900	300	43	3	13	20	12	19	7	13	14	29	4	18	15	8	12	9	23	21	6	10	53.439	0.547	0	0	0	0	0	0	299	84	10	0.320597	0.000154	0.000907	0.000907	306
OXCOAHDH_b1387	85	0.312375	0.829306	0	136	193	199	154	0.646628	0.461877	0.517595	2046	682	88	10	30	43	26	61	18	34	27	65	16	12	35	35	36	37	40	51	8	9	50.737	0.587	0	0	0	0	0	0	681	0	0	0	0	0	0	0
ACNML_b3225	22	0.224344	1.12583	0	54	77	80	87	0.627517	0.372483	0.560403	894	298	26	4	16	17	10	27	5	17	16	34	7	7	11	21	12	15	14	24	1	13	47.657	0.652	0	0	0	0	0	0	297	0	0	0	0	0	0	0
UDPACGALtex_b1377	49	0.0274733	0.683685	1	68	140	60	110	0.550265	0.399471	0.449735	1134	378	42	0	37	12	19	43	5	9	17	27	9	33	5	14	11	21	24	17	5	27	40.354	0.74	3	3	3	3	3	3	377	0	0	0	0	0	0	0
LCTStex_b0241	57	0.045701	0.726706	0	70	118	72	92	0.502841	0.372159	0.465909	1056	352	31	0	31	14	21	37	1	14	25	23	9	27	3	17	12	21	24	16	3	22	46.295	0.669	3	3	3	3	3	3	351	0	0	0	0	0	0	0
ANHGMtex_b0929	44	1.53858	2.15677	0	56	129	52	126	0.556474	0.385675	0.490358	1089	363	34	0	27	14	19	49	1	14	19	23	5	32	5	13	12	16	22	26	2	29	37.082	0.832	3	3	3	3	3	3	362	2	11	0.314587	0	3.2e-05	3.2e-05	261
GLYCLTt2rpp_b3603	53	0.00858713	1.46837	1	70	117	185	180	0.54529	0.447464	0.661232	1656	552	71	5	14	8	43	45	4	47	18	69	14	10	26	17	10	39	35	45	16	15	47.025	0.625	1	1	1	1	1	1	551	3	12	0.239679	0.000831	4.27e-05	4.27e-05	261
P5CD_b1014	201	0.156978	0.767942	0	204	316	449	352	0.662377	0.440575	0.606359	3963	1321	166	13	59	90	29	97	24	69	40	156	27	49	71	73	87	70	66	83	12	39	43.613	0.647	0	0	0	0	0	0	1320	0	0	0	0	0	0	262
ARGabcpp_b0864	39	0.192708	0.702016	0	43	61	72	67	0.625514	0.382716	0.572016	729	243	20	4	10	16	8	14	7	14	8	31	6	11	12	16	15	13	14	16	1	6	39.749	0.688	19	19	19	19	18	14	242	1	13	0.195002	0	2.13e-05	2.13e-05	261
NO3R1pp_b1225	75	0.113832	1.23705	0	74	117	162	160	0.576998	0.407407	0.62768	1539	513	37	17	31	37	18	36	9	29	35	40	15	23	33	19	30	23	23	26	9	22	34.693	0.784	3	3	3	3	3	1	512	0	0	0	0	0	0	0
HEPT2_b3620	114	0.205705	0.891266	1	68	85	108	88	0.624642	0.424069	0.561605	1047	349	36	5	14	23	8	24	10	19	14	41	12	10	24	17	23	18	10	19	7	14	48.713	0.598	0	0	0	0	0	0	348	84	10	0.320597	0.000154	0.000907	0.000907	306
QUIN2tex_b2215	64	0.0280042	1.90111	9	51	107	58	152	0.570652	0.377717	0.570652	1104	368	29	0	32	11	19	48	1	10	17	27	4	32	4	21	13	17	24	25	4	29	29.032	0.898	3	3	3	3	3	3	367	6	11	0.31491	0	7.47e-05	7.47e-05	261
ECOAH4_b3846	59	0.0262198	1.63496	4	132	143	208	247	0.643836	0.389041	0.623288	2190	730	82	5	44	50	30	62	11	37	54	74	21	24	40	24	31	26	30	58	8	18	39.202	0.724	1	1	1	1	1	1	729	3	1	1	0	4.27e-05	4.27e-05	18
PFL_b3114	39	0.138134	0.587276	0	118	175	225	247	0.593464	0.383007	0.616993	2295	765	69	5	57	45	32	53	20	47	37	69	24	31	31	29	44	38	45	45	7	36	40.735	0.703	2	2	2	2	2	1	764	0	0	0	0	0	0	271
GLCDpp_b0124	105	0.130907	0.840786	0	116	200	247	234	0.599749	0.459222	0.603513	2391	797	74	7	41	33	32	75	10	41	32	71	24	39	67	26	29	38	52	56	24	25	42.474	0.692	0	0	0	0	0	0	796	6	12	0.240102	4.75e-06	7.47e-05	7.47e-05	261
PHEt2rpp_b1473	72	0.160715	0.671764	0	60	77	78	79	0.506803	0.44898	0.534014	882	294	30	5	2	5	17	31	4	24	5	45	7	10	11	6	7	20	19	23	9	13	52.353	0.496	0	0	0	0	0	0	293	5	11	0.31491	0	6.4e-05	6.4e-05	261
GTHOXtex_b0929	44	1.53858	2.15677	0	56	129	52	126	0.556474	0.385675	0.490358	1089	363	34	0	27	14	19	49	1	14	19	23	5	32	5	13	12	16	22	26	2	29	37.082	0.832	3	3	3	3	3	3	362	0	0	0	0	0	0	0
NO2tex_b0241	57	0.045701	0.726706	0	70	118	72	92	0.502841	0.372159	0.465909	1056	352	31	0	31	14	21	37	1	14	25	23	9	27	3	17	12	21	24	16	3	22	46.295	0.669	3	3	3	3	3	3	351	0	0	0	0	0	0	0
LALADGLUtex_b1377	49	0.0274733	0.683685	1	68	140	60	110	0.550265	0.399471	0.449735	1134	378	42	0	37	12	19	43	5	9	17	27	9	33	5	14	11	21	24	17	5	27	40.354	0.74	3	3	3	3	3	3	377	0	0	0	0	0	0	0
3CMPtex_b0241	57	0.045701	0.726706	0	70	118	72	92	0.502841	0.372159	0.465909	1056	352	31	0	31	14	21	37	1	14	25	23	9	27	3	17	12	21	24	16	3	22	46.295	0.669	3	3	3	3	3	3	351	0	0	0	0	0	0	0
ASPT_b4139	210	0.329546	1.28762	0	96	119	107	157	0.5762	0.348643	0.551148	1437	479	42	11	19	38	13	34	8	32	27	44	16	36	19	19	16	21	24	43	0	16	37.311	0.792	1	1	1	1	1	1	478	0	0	0	0	0	0	50
GLYC2Ptex_b0929	44	1.53858	2.15677	0	56	129	52	126	0.556474	0.385675	0.490358	1089	363	34	0	27	14	19	49	1	14	19	23	5	32	5	13	12	16	22	26	2	29	37.082	0.832	3	3	3	3	3	3	362	0	0	0	0	0	0	0
AACPS5_b2836	53	0.183582	0.630585	1	136	179	211	194	0.611111	0.405556	0.5625	2160	720	55	4	30	45	36	55	16	39	38	78	23	13	41	27	51	33	44	61	8	22	47.712	0.603	0	0	0	0	0	0	719	1	10	0.306327	0	2.13e-05	2.13e-05	306
ECOAH3_b3846	59	0.0262198	1.63496	4	132	143	208	247	0.643836	0.389041	0.623288	2190	730	82	5	44	50	30	62	11	37	54	74	21	24	40	24	31	26	30	58	8	18	39.202	0.724	1	1	1	1	1	1	729	3	1	1	0	4.27e-05	4.27e-05	17
ILEabcpp_b3460	71	1.56055	1.99746	12	66	72	122	108	0.611413	0.396739	0.625	1104	368	49	3	26	17	11	36	4	22	31	27	7	16	15	20	7	15	18	27	3	13	37.233	0.73	1	1	1	1	1	1	367	1	13	0.19429	0	2.13e-05	2.13e-05	261
23DAPPAtex_b1377	49	0.0274733	0.683685	1	68	140	60	110	0.550265	0.399471	0.449735	1134	378	42	0	37	12	19	43	5	9	17	27	9	33	5	14	11	21	24	17	5	27	40.354	0.74	3	3	3	3	3	3	377	0	0	0	0	0	0	0
CFAS180G_b1661	220	0.217931	1.34575	0	69	120	86	108	0.558747	0.373368	0.506527	1149	383	29	8	29	21	20	26	8	19	19	35	13	19	13	16	24	23	9	24	11	16	48.198	0.625	0	0	0	0	0	0	382	0	0	0	0	0	0	0
O16AUNDtpp_b2037	40	0.262005	0.644747	0	126	166	78	46	0.399038	0.365385	0.298077	1248	416	30	4	5	8	24	26	5	52	20	65	10	22	14	8	10	35	27	33	5	12	44.807	0.389	0	0	0	0	0	0	415	0	0	0	0	0	0	0
PRAIi_b1262	492	0.472053	1.64355	0	79	119	135	121	0.632159	0.387665	0.563877	1362	454	59	7	29	23	16	31	11	25	18	49	6	18	14	29	23	25	14	37	3	16	48.376	0.604	0	0	0	0	0	0	453	163	10	0.374962	5.31e-05	0.0017503	0.0017503	91
DTMPtex_b0929	44	1.53858	2.15677	0	56	129	52	126	0.556474	0.385675	0.490358	1089	363	34	0	27	14	19	49	1	14	19	23	5	32	5	13	12	16	22	26	2	29	37.082	0.832	3	3	3	3	3	3	362	0	0	0	0	0	0	0
LPLIPAL2ATE120_b3825	63	0.201587	0.617796	0	60	99	89	93	0.648094	0.431085	0.533724	1023	341	33	3	23	18	21	26	16	18	5	26	8	10	17	14	36	11	14	24	7	10	54.742	0.58	0	0	0	0	0	0	340	0	0	0	0	0	0	0
3CMPtex_b2215	64	0.0280042	1.90111	9	51	107	58	152	0.570652	0.377717	0.570652	1104	368	29	0	32	11	19	48	1	10	17	27	4	32	4	21	13	17	24	25	4	29	29.032	0.898	3	3	3	3	3	3	367	0	0	0	0	0	0	0
METSOX1tex_b1377	49	0.0274733	0.683685	1	68	140	60	110	0.550265	0.399471	0.449735	1134	378	42	0	37	12	19	43	5	9	17	27	9	33	5	14	11	21	24	17	5	27	40.354	0.74	3	3	3	3	3	3	377	0	0	0	0	0	0	0
Kabcpp_b0698	260	0.190067	1.45543	0	64	131	205	158	0.580645	0.433692	0.650538	1674	558	62	6	9	15	35	56	6	27	8	84	29	24	25	21	16	37	30	49	9	9	45.534	0.606	0	0	0	0	0	0	557	0	0	0	0	0	0	190
ECOAH2_b2341	124	0.0138785	1.06552	4	141	202	204	168	0.61958	0.427972	0.52028	2145	715	75	9	30	44	24	69	13	52	40	68	16	20	38	35	44	32	37	53	2	13	52.384	0.575	4	4	4	4	4	2	714	7	1	1	0	8.54e-05	8.54e-05	173
INDOLEtex_b1377	49	0.0274733	0.683685	1	68	140	60	110	0.550265	0.399471	0.449735	1134	378	42	0	37	12	19	43	5	9	17	27	9	33	5	14	11	21	24	17	5	27	40.354	0.74	3	3	3	3	3	3	377	1	1	1	0	2.13e-05	2.13e-05	188
MLTGY2pp_b4392	179	0.221985	0.815667	0	99	160	228	159	0.592879	0.444272	0.599071	1938	646	74	3	32	39	17	36	3	24	28	57	22	31	29	43	49	37	38	34	20	29	46.125	0.602	0	0	0	0	0	0	645	0	0	0	0	0	0	213
NADH9_b1109	98	0.318241	1.08243	0	72	105	137	121	0.6	0.395402	0.593103	1305	435	39	4	18	23	11	42	17	26	25	52	14	23	17	14	22	20	26	27	2	12	42.461	0.672	0	0	0	0	0	0	434	1	15	0.140369	0	2.13e-05	2.13e-05	261
ACALDtex_b2215	64	0.0280042	1.90111	9	51	107	58	152	0.570652	0.377717	0.570652	1104	368	29	0	32	11	19	48	1	10	17	27	4	32	4	21	13	17	24	25	4	29	29.032	0.898	3	3	3	3	3	3	367	3	11	0.314667	0	4.27e-05	4.27e-05	261
MALTHXabcpp_b4034	64	0.1086	0.858414	0	78	85	111	123	0.554156	0.387909	0.589421	1191	397	50	0	24	27	16	30	3	25	39	34	9	21	21	9	7	15	23	20	8	15	41.528	0.756	0	0	0	0	0	0	396	0	0	0	0	0	0	0
FRUURtex_b0241	57	0.045701	0.726706	0	70	118	72	92	0.502841	0.372159	0.465909	1056	352	31	0	31	14	21	37	1	14	25	23	9	27	3	17	12	21	24	16	3	22	46.295	0.669	3	3	3	3	3	3	351	0	0	0	0	0	0	0
UDPG4E_b0759	484	0.103407	0.813704	0	51	79	79	130	0.616519	0.39823	0.616519	1017	339	26	3	24	14	9	30	13	18	14	27	9	19	21	13	16	19	15	29	5	14	42.472	0.705	0	0	0	0	0	0	338	0	0	0	0	0	0	0
THYMtex_b2215	64	0.0280042	1.90111	9	51	107	58	152	0.570652	0.377717	0.570652	1104	368	29	0	32	11	19	48	1	10	17	27	4	32	4	21	13	17	24	25	4	29	29.032	0.898	3	3	3	3	3	3	367	4	11	0.314748	0	5.34e-05	5.34e-05	261
THIORDXi_b3781	625	0.0391972	0.941381	0	20	26	31	33	0.581818	0.363636	0.581818	330	110	12	2	11	5	4	9	1	9	10	13	2	4	5	3	1	3	6	5	2	2	38.428	0.781	1	1	1	1	1	0	109	2	11	0.315396	3.72e-05	3.2e-05	3.2e-05	261
FE2tex_b1377	49	0.0274733	0.683685	1	68	140	60	110	0.550265	0.399471	0.449735	1134	378	42	0	37	12	19	43	5	9	17	27	9	33	5	14	11	21	24	17	5	27	40.354	0.74	3	3	3	3	3	3	377	1	1	1	0	2.13e-05	2.13e-05	115
MCTP2App_b0149	112	0.131459	0.680924	0	119	210	312	204	0.628402	0.415385	0.610651	2535	845	68	2	52	38	25	66	5	38	40	83	27	35	52	63	60	50	40	57	13	30	39.543	0.669	1	1	0	0	0	0	844	37	10	0.314587	4.54e-05	0.000406	0.000406	306
FLVR_b3844	56	0.109404	0.751612	0	35	69	75	55	0.615385	0.41453	0.555556	702	234	23	3	17	18	10	16	7	17	7	21	7	4	9	6	19	10	13	16	3	7	48.522	0.614	0	0	0	0	0	0	233	1	11	0.314506	0	2.13e-05	2.13e-05	261
PROGLYabcpp_b3543	261	0.41012	0.943299	1	34	70	125	111	0.605882	0.394118	0.694118	1020	340	25	1	14	10	13	31	9	32	6	45	20	6	17	8	20	12	19	36	9	6	44.936	0.623	3	3	3	3	3	3	339	0	0	0	0	0	0	0
CO2tex_b1377	49	0.0274733	0.683685	1	68	140	60	110	0.550265	0.399471	0.449735	1134	378	42	0	37	12	19	43	5	9	17	27	9	33	5	14	11	21	24	17	5	27	40.354	0.74	3	3	3	3	3	3	377	1	1	1	0	2.13e-05	2.13e-05	69
FHL_b2481	50	0.191988	1.04458	0	38	50	53	65	0.635922	0.480583	0.572816	618	206	24	16	8	12	5	12	6	6	7	20	2	8	13	16	10	11	10	15	3	1	51.141	0.572	1	1	1	1	1	1	205	6	12	0.241284	0.00743898	7.47e-05	7.47e-05	261
RMNtex_b0929	44	1.53858	2.15677	0	56	129	52	126	0.556474	0.385675	0.490358	1089	363	34	0	27	14	19	49	1	14	19	23	5	32	5	13	12	16	22	26	2	29	37.082	0.832	3	3	3	3	3	3	362	0	0	0	0	0	0	0
HOPNTAL_b0352	75	0.0523095	0.782764	0	44	84	109	101	0.659763	0.414201	0.621302	1014	338	46	4	27	17	6	31	14	16	13	33	14	11	6	11	20	16	14	25	3	10	45.449	0.664	0	0	0	0	0	0	337	0	0	0	0	0	0	0
LPLIPAL2A161_b3825	63	0.201587	0.617796	0	60	99	89	93	0.648094	0.431085	0.533724	1023	341	33	3	23	18	21	26	16	18	5	26	8	10	17	14	36	11	14	24	7	10	54.742	0.58	0	0	0	0	0	0	340	3	10	0.179909	0	4.27e-05	4.27e-05	198
AACPS9_b2836	53	0.183582	0.630585	1	136	179	211	194	0.611111	0.405556	0.5625	2160	720	55	4	30	45	36	55	16	39	38	78	23	13	41	27	51	33	44	61	8	22	47.712	0.603	0	0	0	0	0	0	719	0	0	0	0	0	0	12
HEXt2rpp_b2223	89	0.0404526	0.938249	0	66	107	123	145	0.546485	0.437642	0.60771	1323	441	49	3	11	11	33	41	6	38	10	50	27	11	27	11	14	25	24	32	9	8	52.444	0.594	0	0	0	0	0	0	440	4	12	0.240055	0.00248984	5.34e-05	5.34e-05	261
2AGPEAT140_b2836	53	0.183582	0.630585	1	136	179	211	194	0.611111	0.405556	0.5625	2160	720	55	4	30	45	36	55	16	39	38	78	23	13	41	27	51	33	44	61	8	22	47.712	0.603	0	0	0	0	0	0	719	4	12	0.138496	1.07e-05	5.34e-05	5.34e-05	197
TRPS3_b1260	238	0.521664	1.28924	4	51	69	77	72	0.635688	0.416357	0.553903	807	269	40	3	13	17	12	19	4	20	13	27	5	9	19	12	11	11	9	17	0	7	48.681	0.619	0	0	0	0	0	0	268	28	10	0.360082	7.59e-06	0.00031	0.00031	91
PRATPP_b2026	587	0.388922	1.1685	2	43	27	64	70	0.593137	0.387255	0.656863	612	204	14	3	12	16	6	13	6	5	11	28	5	7	6	11	9	11	19	13	3	5	39.451	0.647	0	0	0	0	0	0	203	168	10	0.375536	2.39e-05	0.00180367	0.00180367	91
FHL_b2485	38	0.130452	0.768216	1	39	38	78	62	0.562212	0.391705	0.645161	651	217	27	6	2	5	10	12	3	17	7	40	10	8	8	6	7	12	10	19	3	4	46.684	0.595	0	0	0	0	0	0	216	6	12	0.241284	0.00743898	7.47e-05	7.47e-05	261
LPLIPAL2A141_b3825	63	0.201587	0.617796	0	60	99	89	93	0.648094	0.431085	0.533724	1023	341	33	3	23	18	21	26	16	18	5	26	8	10	17	14	36	11	14	24	7	10	54.742	0.58	0	0	0	0	0	0	340	3	12	0.138262	0	4.27e-05	4.27e-05	198
HG2abcpp_b3469	302	0.316471	1.06124	0	130	151	250	202	0.656207	0.474761	0.616644	2199	733	119	9	28	47	18	59	9	45	25	91	13	21	30	26	41	35	49	55	6	6	46.137	0.614	0	0	0	0	0	0	732	0	0	0	0	0	0	0
34dhpactex_b0929	44	1.53858	2.15677	0	56	129	52	126	0.556474	0.385675	0.490358	1089	363	34	0	27	14	19	49	1	14	19	23	5	32	5	13	12	16	22	26	2	29	37.082	0.832	3	3	3	3	3	3	362	0	0	0	0	0	0	0
MALTTRabcpp_b4034	64	0.1086	0.858414	0	78	85	111	123	0.554156	0.387909	0.589421	1191	397	50	0	24	27	16	30	3	25	39	34	9	21	21	9	7	15	23	20	8	15	41.528	0.756	0	0	0	0	0	0	396	0	0	0	0	0	0	0
GALt2pp_b2943	59	0.301354	0.807594	0	69	108	142	146	0.556989	0.417204	0.619355	1395	465	49	3	11	18	29	41	6	36	17	60	23	14	14	12	21	27	27	34	12	10	41.836	0.682	1	1	1	1	1	1	464	0	0	0	0	0	0	0
NADTRHD_b1602	337	0.733641	1.09169	1	64	125	155	119	0.587473	0.399568	0.591793	1389	463	56	2	19	18	22	46	12	38	17	49	20	20	16	8	11	28	22	46	4	8	43.049	0.688	0	0	0	0	0	0	462	0	0	0	0	0	0	229
2AGPGAT120_b2836	53	0.183582	0.630585	1	136	179	211	194	0.611111	0.405556	0.5625	2160	720	55	4	30	45	36	55	16	39	38	78	23	13	41	27	51	33	44	61	8	22	47.712	0.603	0	0	0	0	0	0	719	4	12	0.138481	0.00170373	5.34e-05	5.34e-05	198
3AMPtex_b0929	44	1.53858	2.15677	0	56	129	52	126	0.556474	0.385675	0.490358	1089	363	34	0	27	14	19	49	1	14	19	23	5	32	5	13	12	16	22	26	2	29	37.082	0.832	3	3	3	3	3	3	362	0	0	0	0	0	0	0
NADPHQR3_b3028	88	0.0806958	0.648164	0	37	46	45	66	0.582474	0.360825	0.572165	582	194	12	0	16	9	10	18	6	9	14	14	7	8	9	6	7	7	11	16	6	8	43.951	0.73	0	0	0	0	0	0	193	0	0	0	0	0	0	227
THRD_b3616	136	0.35346	0.85487	0	43	104	92	103	0.573099	0.400585	0.570175	1026	342	26	6	22	18	15	38	10	29	18	23	15	14	14	5	16	15	16	29	6	6	41.428	0.727	0	0	0	0	0	0	341	1	1	1	0	2.13e-05	2.13e-05	57
CD2tex_b2215	64	0.0280042	1.90111	9	51	107	58	152	0.570652	0.377717	0.570652	1104	368	29	0	32	11	19	48	1	10	17	27	4	32	4	21	13	17	24	25	4	29	29.032	0.898	3	3	3	3	3	3	367	0	0	0	0	0	0	0
23CCMPtex_b0929	44	1.53858	2.15677	0	56	129	52	126	0.556474	0.385675	0.490358	1089	363	34	0	27	14	19	49	1	14	19	23	5	32	5	13	12	16	22	26	2	29	37.082	0.832	3	3	3	3	3	3	362	0	0	0	0	0	0	0
FMNRx2_b0937	124	0.0656368	0.697136	0	34	53	53	52	0.682292	0.395833	0.546875	576	192	22	0	12	8	7	9	7	4	7	32	1	5	11	11	11	10	11	14	2	7	50.74	0.575	0	0	0	0	0	0	191	1	11	0.314506	0	2.13e-05	2.13e-05	261
FE3HOXtonex_b3006	291	0.0244404	0.964254	0	41	65	67	72	0.616327	0.408163	0.567347	735	245	33	1	9	12	11	21	3	16	8	28	6	12	4	14	14	15	9	22	3	3	44.038	0.658	0	0	0	0	0	0	244	8	11	0.315072	3.39e-07	9.61e-05	9.61e-05	261
CRNCAL2_b0037	17	0.00640744	0.402913	0	85	133	150	150	0.559846	0.391892	0.579151	1554	518	41	18	31	34	26	34	10	38	24	42	13	20	21	25	31	23	28	31	7	20	47.423	0.614	0	0	0	0	0	0	517	0	0	0	0	0	0	0
HYD3pp_b2994	73	0.313146	0.661274	0	79	143	174	172	0.577465	0.401408	0.609155	1704	568	46	8	31	30	15	42	18	39	29	45	11	30	30	21	20	36	33	51	13	19	39.184	0.759	1	1	1	1	1	1	567	2	13	0.194785	0.00496475	3.2e-05	3.2e-05	261
GTPDPK_b2784	187	0.216635	0.665122	0	119	183	225	218	0.642953	0.375839	0.594631	2235	745	65	11	51	52	17	50	28	47	38	71	15	26	25	36	55	37	26	61	11	22	44.93	0.646	0	0	0	0	0	0	744	2	3	0.571429	2.04e-06	3.2e-05	3.2e-05	165
TDPDRE_b2038	397	0.00681455	0.625761	0	57	77	26	26	0.526882	0.354839	0.27957	558	186	9	3	14	11	13	12	6	13	8	18	1	8	7	8	11	13	6	14	4	6	50.585	0.458	0	0	0	0	0	0	185	84	10	0.320597	0.000154	0.000907	0.000907	306
DOXRBCNtex_b0929	44	1.53858	2.15677	0	56	129	52	126	0.556474	0.385675	0.490358	1089	363	34	0	27	14	19	49	1	14	19	23	5	32	5	13	12	16	22	26	2	29	37.082	0.832	3	3	3	3	3	3	362	1	1	1	0	2.13e-05	2.13e-05	92
PLIPA2G181pp_b3821	101	0.0282509	0.656571	0	38	73	92	87	0.524138	0.396552	0.617241	870	290	18	0	16	15	10	23	5	9	10	29	8	20	13	12	13	19	18	18	10	23	46.721	0.641	0	0	0	0	0	0	289	2	10	0.174576	0	3.2e-05	3.2e-05	198
SPMDt3pp_b1600	98	0.0184775	0.679463	0	28	38	32	24	0.42623	0.385246	0.459016	366	122	11	0	1	6	6	12	1	14	7	20	5	2	1	0	2	10	7	9	3	4	39.986	0.542	1	1	0	0	0	0	121	3	12	0.240479	0.000831	4.27e-05	4.27e-05	306
LPLIPAL1A120pp_b0494	210	0.032285	0.623363	0	31	51	67	60	0.593301	0.382775	0.607656	627	209	22	0	12	7	11	10	4	7	8	29	7	11	14	17	11	11	6	10	6	5	46.887	0.587	0	0	0	0	0	0	208	2	12	0.138277	0	3.2e-05	3.2e-05	198
ALR4x_b3945	117	0.28222	1.12172	1	72	100	103	93	0.663043	0.445652	0.532609	1104	368	57	7	16	29	10	35	9	22	13	37	7	10	16	13	12	12	22	27	3	10	43.854	0.717	0	0	0	0	0	0	367	5	11	0.314829	0	6.4e-05	6.4e-05	261
ACHBS_b0077	544	0.836508	1.19247	3	93	151	195	136	0.613913	0.398261	0.575652	1725	575	47	6	30	29	12	49	19	29	23	53	23	17	28	33	24	31	34	59	9	19	50.011	0.572	1	1	1	1	1	1	574	172	10	0.375882	0.000138	0.00184636	0.00184636	91
DDCAtexi_b2344	76	0.186239	1.56634	0	71	150	93	133	0.519016	0.469799	0.505593	1341	447	50	0	25	13	25	45	5	21	14	31	7	33	16	22	15	39	32	18	12	23	45.305	0.702	0	0	0	0	0	0	446	0	0	0	0	0	0	0
FALDtex_b2215	64	0.0280042	1.90111	9	51	107	58	152	0.570652	0.377717	0.570652	1104	368	29	0	32	11	19	48	1	10	17	27	4	32	4	21	13	17	24	25	4	29	29.032	0.898	3	3	3	3	3	3	367	0	0	0	0	0	0	0
GALCTNtex_b1377	49	0.0274733	0.683685	1	68	140	60	110	0.550265	0.399471	0.449735	1134	378	42	0	37	12	19	43	5	9	17	27	9	33	5	14	11	21	24	17	5	27	40.354	0.74	3	3	3	3	3	3	377	0	0	0	0	0	0	0
CRNDt2rpp_b4111	86	0.0516556	0.801316	0	64	149	166	122	0.550898	0.387226	0.57485	1503	501	47	4	22	18	29	43	9	48	20	60	19	11	23	14	19	26	25	39	7	17	43.98	0.634	0	0	0	0	0	0	500	0	0	0	0	0	0	72
PLIPA2E181pp_b3821	101	0.0282509	0.656571	0	38	73	92	87	0.524138	0.396552	0.617241	870	290	18	0	16	15	10	23	5	9	10	29	8	20	13	12	13	19	18	18	10	23	46.721	0.641	0	0	0	0	0	0	289	3	9	0.250204	0.001448	4.27e-05	4.27e-05	198
MNtex_b1377	49	0.0274733	0.683685	1	68	140	60	110	0.550265	0.399471	0.449735	1134	378	42	0	37	12	19	43	5	9	17	27	9	33	5	14	11	21	24	17	5	27	40.354	0.74	3	3	3	3	3	3	377	336	9	0.424022	0.000798	0.00359666	0.00359666	91
FUM_b4122	105	0.012308	0.778982	0	96	100	139	214	0.608379	0.387978	0.642987	1647	549	53	9	29	36	17	50	15	31	38	51	11	21	27	30	17	25	29	30	3	26	40.16	0.728	1	1	1	1	1	1	548	0	0	0	0	0	0	124
DAMPtex_b0241	57	0.045701	0.726706	0	70	118	72	92	0.502841	0.372159	0.465909	1056	352	31	0	31	14	21	37	1	14	25	23	9	27	3	17	12	21	24	16	3	22	46.295	0.669	3	3	3	3	3	3	351	0	0	0	0	0	0	0
FRULYSt2pp_b3370	14	0.262681	0.93643	2	53	100	125	168	0.515695	0.466368	0.656951	1338	446	54	8	10	9	28	38	3	42	16	56	14	11	22	7	10	33	32	28	11	13	48.524	0.61	0	0	0	0	0	0	445	0	0	0	0	0	0	0
FRUtex_b1377	49	0.0274733	0.683685	1	68	140	60	110	0.550265	0.399471	0.449735	1134	378	42	0	37	12	19	43	5	9	17	27	9	33	5	14	11	21	24	17	5	27	40.354	0.74	3	3	3	3	3	3	377	0	0	0	0	0	0	0
HACD6_b2341	124	0.0138785	1.06552	4	141	202	204	168	0.61958	0.427972	0.52028	2145	715	75	9	30	44	24	69	13	52	40	68	16	20	38	35	44	32	37	53	2	13	52.384	0.575	4	4	4	4	4	2	714	2	1	1	0	3.2e-05	3.2e-05	95
2AGPE141tipp_b2835	60	0.122308	0.614945	0	50	93	149	106	0.580402	0.444724	0.640704	1194	398	57	4	4	9	20	43	4	26	12	57	14	16	14	10	10	22	18	38	9	10	50.482	0.583	0	0	0	0	0	0	397	5	11	0.159797	0.000211	6.4e-05	6.4e-05	198
HXCT_b2221	247	0.0346673	0.926519	1	46	54	45	76	0.638009	0.429864	0.547511	663	221	14	2	13	13	6	26	4	17	6	27	7	6	10	7	13	7	22	18	1	1	47.491	0.562	0	0	0	0	0	0	220	1	14	0.162273	0	2.13e-05	2.13e-05	261
PHETA1_b0928	104	0.34765	0.988597	2	68	116	93	120	0.612091	0.418136	0.536524	1191	397	46	5	20	27	20	30	6	17	18	38	8	23	15	16	22	21	22	26	5	11	44.535	0.728	1	1	1	1	1	1	396	162	10	0.37416	0.000425	0.00173963	0.00173963	91
LPLIPAL2ATG180_b3825	63	0.201587	0.617796	0	60	99	89	93	0.648094	0.431085	0.533724	1023	341	33	3	23	18	21	26	16	18	5	26	8	10	17	14	36	11	14	24	7	10	54.742	0.58	0	0	0	0	0	0	340	0	0	0	0	0	0	0
THRtex_b1377	49	0.0274733	0.683685	1	68	140	60	110	0.550265	0.399471	0.449735	1134	378	42	0	37	12	19	43	5	9	17	27	9	33	5	14	11	21	24	17	5	27	40.354	0.74	3	3	3	3	3	3	377	2	11	0.314587	0	3.2e-05	3.2e-05	261
MANptspp_b1818	96	0.198948	1.09694	5	32	89	68	78	0.599251	0.400749	0.546816	801	267	40	2	8	6	10	25	4	32	3	27	13	14	8	9	5	10	15	28	2	5	38.328	0.759	0	0	0	0	0	0	266	0	0	0	0	0	0	0
PSCLYStex_b0241	57	0.045701	0.726706	0	70	118	72	92	0.502841	0.372159	0.465909	1056	352	31	0	31	14	21	37	1	14	25	23	9	27	3	17	12	21	24	16	3	22	46.295	0.669	3	3	3	3	3	3	351	0	0	0	0	0	0	0
METSOX1tex_b0929	44	1.53858	2.15677	0	56	129	52	126	0.556474	0.385675	0.490358	1089	363	34	0	27	14	19	49	1	14	19	23	5	32	5	13	12	16	22	26	2	29	37.082	0.832	3	3	3	3	3	3	362	0	0	0	0	0	0	0
UDCPDPpp_b0841	100	0.228847	1.76272	5	31	51	67	50	0.552764	0.407035	0.58794	597	199	19	3	8	2	11	12	8	15	4	32	7	5	8	6	8	13	6	16	11	4	50.451	0.536	0	0	0	0	0	0	198	55	11	0.330724	0.000389	0.000598	0.000598	306
XYLtex_b0241	57	0.045701	0.726706	0	70	118	72	92	0.502841	0.372159	0.465909	1056	352	31	0	31	14	21	37	1	14	25	23	9	27	3	17	12	21	24	16	3	22	46.295	0.669	3	3	3	3	3	3	351	0	0	0	0	0	0	0
GPDDA2pp_b2239	68	0.0508723	0.964293	0	65	114	116	64	0.554318	0.311978	0.501393	1077	359	26	1	31	23	14	24	10	17	32	29	15	17	16	16	10	12	19	22	4	20	47.602	0.648	0	0	0	0	0	0	358	3	9	0.25436	0.00111815	4.27e-05	4.27e-05	198
SUCFUMtpp_b4123	82	0.0966133	0.659513	0	58	116	141	132	0.561521	0.395973	0.610738	1341	447	48	5	15	12	23	38	6	50	16	53	16	10	22	10	12	27	19	43	6	15	42.419	0.685	1	1	1	1	1	1	446	0	0	0	0	0	0	0
ADOCBLtonex_b3006	291	0.0244404	0.964254	0	41	65	67	72	0.616327	0.408163	0.567347	735	245	33	1	9	12	11	21	3	16	8	28	6	12	4	14	14	15	9	22	3	3	44.038	0.658	0	0	0	0	0	0	244	0	0	0	0	0	0	0
CDAPPA161_b3918	68	0.177121	0.562483	0	51	79	77	45	0.575397	0.400794	0.484127	756	252	18	4	9	16	7	14	6	12	9	31	8	15	16	14	19	15	11	16	4	7	47.779	0.536	0	0	0	0	0	0	251	1	11	0.245984	0	2.13e-05	2.13e-05	91
GALtex_b0929	44	1.53858	2.15677	0	56	129	52	126	0.556474	0.385675	0.490358	1089	363	34	0	27	14	19	49	1	14	19	23	5	32	5	13	12	16	22	26	2	29	37.082	0.832	3	3	3	3	3	3	362	0	0	0	0	0	0	0
HACD3_b3846	59	0.0262198	1.63496	4	132	143	208	247	0.643836	0.389041	0.623288	2190	730	82	5	44	50	30	62	11	37	54	74	21	24	40	24	31	26	30	58	8	18	39.202	0.724	1	1	1	1	1	1	729	3	1	1	0	4.27e-05	4.27e-05	17
ME2_b2463	520	0.402563	0.942613	0	124	177	245	214	0.630263	0.389474	0.603947	2280	760	87	9	42	54	27	52	12	54	40	65	26	30	46	24	38	34	29	72	1	17	41.963	0.713	0	0	0	0	0	0	759	0	0	0	0	0	0	204
MLTG1_b0403	60	0.0352794	0.304984	0	96	161	207	141	0.647934	0.414876	0.575207	1815	605	51	7	45	27	26	45	22	21	19	57	15	21	37	41	40	26	23	38	22	21	46.909	0.604	0	0	0	0	0	0	604	0	0	0	0	0	0	0
CFAS160G_b1661	220	0.217931	1.34575	0	69	120	86	108	0.558747	0.373368	0.506527	1149	383	29	8	29	21	20	26	8	19	19	35	13	19	13	16	24	23	9	24	11	16	48.198	0.625	0	0	0	0	0	0	382	0	0	0	0	0	0	0
MALt2_3pp_b4123	82	0.0966133	0.659513	0	58	116	141	132	0.561521	0.395973	0.610738	1341	447	48	5	15	12	23	38	6	50	16	53	16	10	22	10	12	27	19	43	6	15	42.419	0.685	1	1	1	1	1	1	446	1	13	0.193615	0	2.13e-05	2.13e-05	261
FE3HOXabcpp_b0152	51	0.00137629	0.771041	0	51	67	100	79	0.59596	0.441077	0.602694	891	297	32	1	17	13	13	18	5	13	8	39	14	11	22	8	19	17	13	18	8	7	45.741	0.583	0	0	0	0	0	0	296	8	11	0.315072	3.39e-07	9.61e-05	9.61e-05	261
GARFT_b2500	434	0.0386071	0.342041	0	31	60	55	67	0.638498	0.399061	0.57277	639	213	25	1	15	12	8	16	10	15	7	19	4	8	10	8	11	11	9	15	2	6	47.453	0.648	1	1	1	1	1	0	212	0	0	0	0	0	0	135
ARGDC_b4117	95	0.12552	0.828624	0	133	174	174	275	0.582011	0.404762	0.593915	2268	756	62	10	49	47	32	56	25	34	29	59	28	34	39	29	33	46	46	52	14	31	40.986	0.7	1	1	1	1	1	1	755	0	0	0	0	0	0	48
GLCP_b3417	83	0.193274	0.975522	0	120	200	274	204	0.615288	0.354637	0.598997	2394	798	80	7	53	44	31	49	24	43	54	82	14	42	30	47	41	25	31	54	20	26	42.166	0.715	1	1	1	1	1	1	797	0	0	0	0	0	0	139
AB6PGH_b2901	105	0.0235533	0.797104	0	79	109	126	166	0.554167	0.360417	0.608333	1440	480	26	10	30	37	26	42	12	20	31	29	16	21	21	12	24	20	19	38	11	34	40.412	0.723	0	0	0	0	0	0	479	0	0	0	0	0	0	0
SUCRtex_b2215	64	0.0280042	1.90111	9	51	107	58	152	0.570652	0.377717	0.570652	1104	368	29	0	32	11	19	48	1	10	17	27	4	32	4	21	13	17	24	25	4	29	29.032	0.898	3	3	3	3	3	3	367	0	0	0	0	0	0	0
AACPS2_b2836	53	0.183582	0.630585	1	136	179	211	194	0.611111	0.405556	0.5625	2160	720	55	4	30	45	36	55	16	39	38	78	23	13	41	27	51	33	44	61	8	22	47.712	0.603	0	0	0	0	0	0	719	0	0	0	0	0	0	10
HYD1pp_b2719	135	0.119729	1.03609	0	37	68	73	78	0.648438	0.453125	0.589844	768	256	25	7	15	16	6	23	6	17	9	23	6	7	18	8	19	12	8	18	3	9	42.444	0.67	2	2	2	2	2	1	255	1	13	0.194414	0	2.13e-05	2.13e-05	261
G3PEabcpp_b3453	108	0.119204	1.28774	0	68	83	151	137	0.544419	0.410023	0.656036	1317	439	47	2	23	27	20	36	5	14	37	33	14	23	24	21	11	25	27	20	8	21	40.497	0.679	0	0	0	0	0	0	438	1	10	0.187452	0	2.13e-05	2.13e-05	198
G1Ptex_b2215	64	0.0280042	1.90111	9	51	107	58	152	0.570652	0.377717	0.570652	1104	368	29	0	32	11	19	48	1	10	17	27	4	32	4	21	13	17	24	25	4	29	29.032	0.898	3	3	3	3	3	3	367	0	0	0	0	0	0	0
OHPBAT_b0907	274	0.715163	1.37358	12	58	117	89	99	0.595041	0.391185	0.517906	1089	363	41	4	25	19	18	29	6	19	20	30	11	20	15	11	16	20	12	28	5	13	47.793	0.669	0	0	0	0	0	0	362	336	9	0.424022	0.000798	0.00359666	0.00359666	91
LCTStex_b0929	44	1.53858	2.15677	0	56	129	52	126	0.556474	0.385675	0.490358	1089	363	34	0	27	14	19	49	1	14	19	23	5	32	5	13	12	16	22	26	2	29	37.082	0.832	3	3	3	3	3	3	362	0	0	0	0	0	0	0
S2FE2SR_b1682	500	0.417541	0.719378	0	46	60	72	71	0.60241	0.337349	0.574297	747	249	13	1	20	19	10	23	5	14	14	30	6	6	8	12	12	16	10	20	1	8	46.969	0.566	1	1	1	0	0	0	248	359	9	0.420096	0.0336325	0.00384213	0.00384213	302
NOVBCNtpp_b0462	199	0.307416	1.82526	0	134	248	363	305	0.584762	0.398095	0.63619	3150	1050	105	2	47	50	54	89	11	72	43	102	42	39	45	48	38	62	67	97	9	27	40.532	0.702	2	2	2	2	2	2	1049	1	1	1	0	2.13e-05	2.13e-05	242
FACOAL80t2pp_b1701	35	0.233017	0.883692	1	125	158	141	125	0.582878	0.420765	0.484517	1647	549	53	15	30	33	20	35	13	28	27	63	13	13	27	23	30	31	32	38	8	16	48.624	0.556	0	0	0	0	0	0	548	0	0	0	0	0	0	0
ALAALAD_b1488	80	0.260329	1.25288	2	31	52	52	59	0.597938	0.417526	0.572165	582	194	22	4	13	8	6	12	8	13	4	20	5	5	10	13	7	14	9	10	3	7	56.355	0.6	0	0	0	0	0	0	193	0	0	0	0	0	0	33
ALR2_b3012	239	0.474531	1.31244	1	61	52	63	100	0.612319	0.336957	0.59058	828	276	19	1	20	17	6	20	9	21	21	29	5	11	13	18	11	10	11	19	8	6	47.342	0.615	1	1	1	1	1	1	275	5	11	0.314829	0	6.4e-05	6.4e-05	261
FACOAL141t2pp_b1701	35	0.233017	0.883692	1	125	158	141	125	0.582878	0.420765	0.484517	1647	549	53	15	30	33	20	35	13	28	27	63	13	13	27	23	30	31	32	38	8	16	48.624	0.556	0	0	0	0	0	0	548	17	11	0.160382	0.0101496	0.000192	0.000192	198
ALAALAtex_b2215	64	0.0280042	1.90111	9	51	107	58	152	0.570652	0.377717	0.570652	1104	368	29	0	32	11	19	48	1	10	17	27	4	32	4	21	13	17	24	25	4	29	29.032	0.898	3	3	3	3	3	3	367	2	11	0.314587	0	3.2e-05	3.2e-05	261
AACPS1_b2836	53	0.183582	0.630585	1	136	179	211	194	0.611111	0.405556	0.5625	2160	720	55	4	30	45	36	55	16	39	38	78	23	13	41	27	51	33	44	61	8	22	47.712	0.603	0	0	0	0	0	0	719	1	10	0.306327	0	2.13e-05	2.13e-05	306
MOBDabcpp_b0764	254	0.0781778	0.842045	0	40	60	75	55	0.573913	0.482609	0.565217	690	230	24	2	4	9	15	20	1	18	3	36	6	1	12	3	17	16	14	19	6	3	45.175	0.559	1	1	0	0	0	0	229	336	9	0.424022	0.000798	0.00359666	0.00359666	91
UDCPDPpp_b1278	82	0.0324914	0.618938	0	72	65	75	43	0.588235	0.466667	0.462745	765	255	29	2	3	15	11	15	6	16	10	32	5	3	13	11	18	10	15	21	17	2	55.788	0.485	0	0	0	0	0	0	254	55	11	0.330724	0.000389	0.000598	0.000598	306
THMDtex_b1377	49	0.0274733	0.683685	1	68	140	60	110	0.550265	0.399471	0.449735	1134	378	42	0	37	12	19	43	5	9	17	27	9	33	5	14	11	21	24	17	5	27	40.354	0.74	3	3	3	3	3	3	377	3	11	0.31491	0.000829	4.27e-05	4.27e-05	261
R5Ptex_b0241	57	0.045701	0.726706	0	70	118	72	92	0.502841	0.372159	0.465909	1056	352	31	0	31	14	21	37	1	14	25	23	9	27	3	17	12	21	24	16	3	22	46.295	0.669	3	3	3	3	3	3	351	0	0	0	0	0	0	0
MOAT3C_b3624	48	0.00762832	1.17665	0	79	132	36	37	0.40493	0.31338	0.257042	852	284	11	6	22	10	16	9	5	30	25	26	5	15	8	9	18	26	11	15	0	16	48.396	0.492	0	0	0	0	0	0	283	84	10	0.320597	0.000154	0.000907	0.000907	306
FACOAE120_b0452	204	0.111435	0.81707	0	49	82	83	73	0.637631	0.393728	0.543554	861	287	22	1	12	19	16	21	12	12	10	31	5	11	20	16	16	20	10	21	3	8	48.274	0.628	0	0	0	0	0	0	286	2	10	0.311546	1.05e-06	3.2e-05	3.2e-05	302
UMPtex_b2215	64	0.0280042	1.90111	9	51	107	58	152	0.570652	0.377717	0.570652	1104	368	29	0	32	11	19	48	1	10	17	27	4	32	4	21	13	17	24	25	4	29	29.032	0.898	3	3	3	3	3	3	367	0	0	0	0	0	0	0
G3PGabcpp_b3452	98	0.320767	0.936113	5	27	50	100	119	0.537162	0.398649	0.739865	888	296	29	0	9	6	33	15	3	19	5	35	4	6	14	12	12	25	15	31	7	15	42.306	0.638	1	0	0	0	0	0	295	1	10	0.160319	0	2.13e-05	2.13e-05	198
ORNtex_b0241	57	0.045701	0.726706	0	70	118	72	92	0.502841	0.372159	0.465909	1056	352	31	0	31	14	21	37	1	14	25	23	9	27	3	17	12	21	24	16	3	22	46.295	0.669	3	3	3	3	3	3	351	3	11	0.315234	0.000896	4.27e-05	4.27e-05	261
ANHGMtex_b0241	57	0.045701	0.726706	0	70	118	72	92	0.502841	0.372159	0.465909	1056	352	31	0	31	14	21	37	1	14	25	23	9	27	3	17	12	21	24	16	3	22	46.295	0.669	3	3	3	3	3	3	351	2	11	0.314587	0	3.2e-05	3.2e-05	261
BWCOGDS1_b3856	184	0.18223	0.79815	0	44	48	55	29	0.619318	0.363636	0.477273	528	176	18	1	15	12	5	12	6	11	12	22	6	3	7	6	8	6	9	12	3	1	54.16	0.485	0	0	0	0	0	0	175	0	0	0	0	0	0	0
PSCVT_b0908	205	0.31961	1.35412	7	78	132	118	100	0.577103	0.436916	0.509346	1284	428	46	6	26	22	13	37	8	26	17	48	14	18	18	12	21	22	34	24	2	13	47.062	0.638	0	0	0	0	0	0	427	169	10	0.375421	0.000169	0.00181434	0.00181434	91
PEAMNtex_b0241	57	0.045701	0.726706	0	70	118	72	92	0.502841	0.372159	0.465909	1056	352	31	0	31	14	21	37	1	14	25	23	9	27	3	17	12	21	24	16	3	22	46.295	0.669	3	3	3	3	3	3	351	0	0	0	0	0	0	0
RNDR1_b3781	625	0.0391972	0.941381	0	20	26	31	33	0.581818	0.363636	0.581818	330	110	12	2	11	5	4	9	1	9	10	13	2	4	5	3	1	3	6	5	2	2	38.428	0.781	1	1	1	1	1	0	109	1	11	0.239539	0	2.13e-05	2.13e-05	261
DDPA_b0754	186	0.359191	1.04249	1	59	93	97	102	0.60114	0.396011	0.566952	1053	351	38	7	22	22	8	29	11	25	24	34	8	18	14	11	15	18	14	22	4	6	45.735	0.665	2	2	2	2	2	2	350	170	10	0.375306	0.000717	0.00182501	0.00182501	91
MDDEP3pp_b2328	93	0.124253	0.670888	0	47	69	86	73	0.621818	0.461818	0.578182	825	275	21	6	17	8	9	20	9	13	13	30	7	5	24	19	15	20	15	15	6	2	49.134	0.591	0	0	0	0	0	0	274	15	11	0.255688	1.79e-06	0.000171	0.000171	306
CO2tex_b2215	64	0.0280042	1.90111	9	51	107	58	152	0.570652	0.377717	0.570652	1104	368	29	0	32	11	19	48	1	10	17	27	4	32	4	21	13	17	24	25	4	29	29.032	0.898	3	3	3	3	3	3	367	1	1	1	0	2.13e-05	2.13e-05	69
MPTG_b3396	204	0.0245856	0.567549	0	123	195	297	236	0.609871	0.430082	0.626322	2553	851	88	4	41	42	29	70	10	48	32	63	21	40	48	58	46	46	49	65	14	36	43.186	0.662	2	2	1	1	1	1	850	192	10	0.330992	0.00197194	0.00205981	0.00205981	306
SFGTHi_b0355	81	0.0204746	0.706801	0	45	87	79	67	0.561151	0.370504	0.52518	834	278	24	3	14	16	9	18	12	14	12	23	10	15	14	14	10	21	7	17	5	19	51.743	0.597	1	1	1	1	1	1	277	0	0	0	0	0	0	0
PACCOAE_b1391	155	0.272569	0.64888	0	30	40	46	50	0.578313	0.518072	0.578313	498	166	13	8	7	10	5	10	6	11	2	12	5	2	16	6	10	8	16	10	4	4	48.558	0.577	0	0	0	0	0	0	165	0	0	0	0	0	0	0
ACACT5r_b3845	151	0.130464	1.47873	1	50	103	130	105	0.659794	0.466495	0.60567	1164	388	57	7	18	20	11	37	12	20	11	36	21	13	16	13	23	23	16	28	2	3	39.064	0.685	2	2	2	2	2	2	387	3	1	1	0	4.27e-05	4.27e-05	174
HSTPT_b2021	97	0.573447	1.23474	1	61	71	107	118	0.610644	0.420168	0.630252	1071	357	37	9	15	26	9	20	1	24	12	38	4	15	20	21	21	18	20	28	4	14	41.639	0.65	0	0	0	0	0	0	356	168	10	0.375536	2.39e-05	0.00180367	0.00180367	91
UDPGALtex_b2215	64	0.0280042	1.90111	9	51	107	58	152	0.570652	0.377717	0.570652	1104	368	29	0	32	11	19	48	1	10	17	27	4	32	4	21	13	17	24	25	4	29	29.032	0.898	3	3	3	3	3	3	367	0	0	0	0	0	0	0
GALCTNLtex_b1377	49	0.0274733	0.683685	1	68	140	60	110	0.550265	0.399471	0.449735	1134	378	42	0	37	12	19	43	5	9	17	27	9	33	5	14	11	21	24	17	5	27	40.354	0.74	3	3	3	3	3	3	377	0	0	0	0	0	0	0
TMAOtex_b2215	64	0.0280042	1.90111	9	51	107	58	152	0.570652	0.377717	0.570652	1104	368	29	0	32	11	19	48	1	10	17	27	4	32	4	21	13	17	24	25	4	29	29.032	0.898	3	3	3	3	3	3	367	0	0	0	0	0	0	0
CLPNS181pp_b0789	74	0.216763	0.648401	0	74	93	128	119	0.649758	0.386473	0.596618	1242	414	37	2	22	30	17	26	15	22	16	42	9	18	21	19	38	12	14	30	9	14	45.21	0.594	0	0	0	0	0	0	413	27	10	0.30872	0.000831	0.000299	0.000299	306
LPLIPAL2G140_b3825	63	0.201587	0.617796	0	60	99	89	93	0.648094	0.431085	0.533724	1023	341	33	3	23	18	21	26	16	18	5	26	8	10	17	14	36	11	14	24	7	10	54.742	0.58	0	0	0	0	0	0	340	4	10	0.161652	0.00148701	5.34e-05	5.34e-05	197
HADPCOADH3_b1395	294	0.063691	0.608246	0	105	124	158	89	0.647059	0.430672	0.518908	1428	476	60	6	19	35	10	33	8	29	17	51	10	12	20	23	29	24	26	44	7	12	51.637	0.544	1	1	1	1	1	1	475	0	0	0	0	0	0	0
NO2tex_b1377	49	0.0274733	0.683685	1	68	140	60	110	0.550265	0.399471	0.449735	1134	378	42	0	37	12	19	43	5	9	17	27	9	33	5	14	11	21	24	17	5	27	40.354	0.74	3	3	3	3	3	3	377	0	0	0	0	0	0	0
HACD7_b3846	59	0.0262198	1.63496	4	132	143	208	247	0.643836	0.389041	0.623288	2190	730	82	5	44	50	30	62	11	37	54	74	21	24	40	24	31	26	30	58	8	18	39.202	0.724	1	1	1	1	1	1	729	2	1	1	0	3.2e-05	3.2e-05	96
PLIPA2G180pp_b3821	101	0.0282509	0.656571	0	38	73	92	87	0.524138	0.396552	0.617241	870	290	18	0	16	15	10	23	5	9	10	29	8	20	13	12	13	19	18	18	10	23	46.721	0.641	0	0	0	0	0	0	289	2	9	0.214611	0	3.2e-05	3.2e-05	198
TGBPA_b2096	70	0.392802	2.30756	6	46	71	93	75	0.610526	0.392982	0.589474	855	285	37	4	16	15	9	17	13	15	12	24	7	14	10	15	11	16	16	25	1	7	52.574	0.578	2	2	2	2	2	2	284	0	0	0	0	0	0	0
TARTD_b3062	109	0.0755385	0.588052	2	36	33	60	73	0.59901	0.361386	0.658416	606	202	10	6	8	21	7	16	7	17	15	16	6	5	10	4	11	5	12	19	3	3	38.95	0.691	0	0	0	0	0	0	201	0	0	0	0	0	0	0
SUCASPtpp_b4123	82	0.0966133	0.659513	0	58	116	141	132	0.561521	0.395973	0.610738	1341	447	48	5	15	12	23	38	6	50	16	53	16	10	22	10	12	27	19	43	6	15	42.419	0.685	1	1	1	1	1	1	446	0	0	0	0	0	0	305
GLYC3Pabcpp_b3452	98	0.320767	0.936113	5	27	50	100	119	0.537162	0.398649	0.739865	888	296	29	0	9	6	33	15	3	19	5	35	4	6	14	12	12	25	15	31	7	15	42.306	0.638	1	0	0	0	0	0	295	0	0	0	0	0	0	150
ALR2_b3001	190	0.581368	1.80393	1	59	88	113	87	0.582133	0.403458	0.576369	1041	347	28	2	16	21	8	28	8	13	15	49	11	20	14	19	21	26	13	13	7	14	48.881	0.576	0	0	0	0	0	0	346	5	11	0.314829	0	6.4e-05	6.4e-05	261
PPAtex_b2215	64	0.0280042	1.90111	9	51	107	58	152	0.570652	0.377717	0.570652	1104	368	29	0	32	11	19	48	1	10	17	27	4	32	4	21	13	17	24	25	4	29	29.032	0.898	3	3	3	3	3	3	367	0	0	0	0	0	0	0
SPMDabcpp_b1440	51	0.153557	1.50379	2	65	90	112	115	0.544503	0.445026	0.594241	1146	382	34	5	20	17	13	31	6	15	26	25	11	14	26	19	11	20	29	29	14	16	43.414	0.665	0	0	0	0	0	0	381	1	13	0.19389	0	2.13e-05	2.13e-05	306
ECA4OALpp_b3622	45	0.106459	0.752614	0	144	170	51	55	0.361905	0.342857	0.252381	1260	420	32	4	6	12	27	19	7	56	20	64	8	29	9	4	14	41	23	20	2	22	51.84	0.362	0	0	0	0	0	0	419	45	11	0.325452	0.000102	0.000491	0.000491	306
GTHOXtex_b2215	64	0.0280042	1.90111	9	51	107	58	152	0.570652	0.377717	0.570652	1104	368	29	0	32	11	19	48	1	10	17	27	4	32	4	21	13	17	24	25	4	29	29.032	0.898	3	3	3	3	3	3	367	0	0	0	0	0	0	0
MPTS_b0784	246	0.0680338	0.531237	0	16	19	27	20	0.695122	0.402439	0.573171	246	82	12	0	7	5	6	5	2	1	2	9	2	1	4	4	3	2	6	9	1	0	40.589	0.681	0	0	0	0	0	0	81	336	9	0.424022	0.000798	0.00359666	0.00359666	91
ASPtex_b2215	64	0.0280042	1.90111	9	51	107	58	152	0.570652	0.377717	0.570652	1104	368	29	0	32	11	19	48	1	10	17	27	4	32	4	21	13	17	24	25	4	29	29.032	0.898	3	3	3	3	3	3	367	2	11	0.314587	0	3.2e-05	3.2e-05	261
TMAOR1pp_b0997	31	0.26116	0.866219	8	120	199	293	237	0.612485	0.42285	0.624264	2547	849	74	10	45	47	33	76	28	46	36	65	19	37	44	48	48	44	42	59	20	27	43.369	0.664	3	2	2	2	2	2	848	0	0	0	0	0	0	0
IDONtex_b0241	57	0.045701	0.726706	0	70	118	72	92	0.502841	0.372159	0.465909	1056	352	31	0	31	14	21	37	1	14	25	23	9	27	3	17	12	21	24	16	3	22	46.295	0.669	3	3	3	3	3	3	351	3	11	0.314667	0	4.27e-05	4.27e-05	261
ALCD2x_b0356	234	0.0128515	0.708422	0	63	102	82	123	0.624324	0.432432	0.554054	1110	370	31	10	21	22	14	43	12	22	20	22	8	12	18	9	15	16	23	41	3	7	40.752	0.72	1	1	1	1	1	0	369	4	11	0.314748	0	5.34e-05	5.34e-05	261
HPYRRx_b3553	279	0.313369	1.12824	0	76	69	82	98	0.621538	0.384615	0.553846	975	325	40	4	18	22	11	19	14	15	13	36	10	15	13	11	14	14	19	28	2	6	50.321	0.588	0	0	0	0	0	0	324	1	2	0.666667	0	2.13e-05	2.13e-05	178
HISTD_b2020	573	0.77154	0.84476	0	69	88	139	139	0.634483	0.468966	0.63908	1305	435	63	7	22	28	12	24	5	22	17	39	7	13	22	23	21	34	30	36	2	7	42.132	0.659	0	0	0	0	0	0	434	168	10	0.375536	2.39e-05	0.00180367	0.00180367	91
23CCMPtex_b2215	64	0.0280042	1.90111	9	51	107	58	152	0.570652	0.377717	0.570652	1104	368	29	0	32	11	19	48	1	10	17	27	4	32	4	21	13	17	24	25	4	29	29.032	0.898	3	3	3	3	3	3	367	0	0	0	0	0	0	0
NADH16pp_b2278	438	0.24606	0.910616	0	60	113	227	214	0.592834	0.403909	0.718241	1842	614	69	3	14	15	38	59	15	33	15	99	29	20	18	11	16	33	33	58	16	19	37.379	0.707	0	0	0	0	0	0	613	1	10	0.295894	0	2.13e-05	2.13e-05	302
MANptspp_b2415	225	0.0245069	1.24341	4	18	22	22	24	0.593023	0.395349	0.534884	258	86	9	0	1	9	4	6	2	3	7	8	2	2	2	6	1	6	10	7	0	0	38.988	0.805	1	1	1	0	0	0	85	0	0	0	0	0	0	0
THYMtex_b0929	44	1.53858	2.15677	0	56	129	52	126	0.556474	0.385675	0.490358	1089	363	34	0	27	14	19	49	1	14	19	23	5	32	5	13	12	16	22	26	2	29	37.082	0.832	3	3	3	3	3	3	362	4	11	0.314748	0	5.34e-05	5.34e-05	261
BALAtex_b1377	49	0.0274733	0.683685	1	68	140	60	110	0.550265	0.399471	0.449735	1134	378	42	0	37	12	19	43	5	9	17	27	9	33	5	14	11	21	24	17	5	27	40.354	0.74	3	3	3	3	3	3	377	0	0	0	0	0	0	0
ACACT4r_b2342	127	0.202332	1.34639	2	82	117	128	110	0.649886	0.480549	0.544622	1311	437	63	2	19	23	13	39	9	19	13	46	16	10	19	18	31	25	28	32	3	8	51.067	0.599	2	2	2	2	2	2	436	3	1	1	0	4.27e-05	4.27e-05	18
CBPS_b0032	606	0.995983	1.9892	2	65	96	98	124	0.605744	0.415144	0.579634	1149	383	39	4	25	20	16	33	15	23	20	37	6	16	20	14	16	18	27	23	2	8	48.5	0.659	0	0	0	0	0	0	382	2	11	0.259314	1.96e-07	3.2e-05	3.2e-05	198
NI2tex_b0241	57	0.045701	0.726706	0	70	118	72	92	0.502841	0.372159	0.465909	1056	352	31	0	31	14	21	37	1	14	25	23	9	27	3	17	12	21	24	16	3	22	46.295	0.669	3	3	3	3	3	3	351	336	9	0.424022	0.000798	0.00359666	0.00359666	91
NTD5_b2291	94	0.0518436	0.646284	0	43	47	60	50	0.605	0.325	0.55	600	200	23	2	10	19	9	4	7	10	12	25	7	9	7	9	10	13	5	11	1	6	49.861	0.613	0	0	0	0	0	0	199	0	0	0	0	0	0	248
LYXtex_b0241	57	0.045701	0.726706	0	70	118	72	92	0.502841	0.372159	0.465909	1056	352	31	0	31	14	21	37	1	14	25	23	9	27	3	17	12	21	24	16	3	22	46.295	0.669	3	3	3	3	3	3	351	0	0	0	0	0	0	0
FUSAtpp_b3035	76	0.232213	0.78678	0	80	129	139	146	0.554656	0.408907	0.576923	1482	494	57	0	25	20	10	24	3	21	18	53	6	43	17	44	22	44	36	28	1	21	45.516	0.658	0	0	0	0	0	0	493	1	1	1	0	2.13e-05	2.13e-05	125
VALtex_b0929	44	1.53858	2.15677	0	56	129	52	126	0.556474	0.385675	0.490358	1089	363	34	0	27	14	19	49	1	14	19	23	5	32	5	13	12	16	22	26	2	29	37.082	0.832	3	3	3	3	3	3	362	3	11	0.31491	0.000829	4.27e-05	4.27e-05	261
CTBTabcpp_b2679	85	0.0960721	1.60442	0	54	73	91	113	0.55287	0.407855	0.616314	993	331	41	2	20	13	13	27	8	15	24	22	7	22	15	16	4	12	26	21	8	14	45.371	0.715	0	0	0	0	0	0	330	1	1	1	0	2.13e-05	2.13e-05	74
ACMUMtex_b0929	44	1.53858	2.15677	0	56	129	52	126	0.556474	0.385675	0.490358	1089	363	34	0	27	14	19	49	1	14	19	23	5	32	5	13	12	16	22	26	2	29	37.082	0.832	3	3	3	3	3	3	362	0	0	0	0	0	0	0
ADEtex_b2215	64	0.0280042	1.90111	9	51	107	58	152	0.570652	0.377717	0.570652	1104	368	29	0	32	11	19	48	1	10	17	27	4	32	4	21	13	17	24	25	4	29	29.032	0.898	3	3	3	3	3	3	367	3	11	0.314667	0	4.27e-05	4.27e-05	261
G3PD6_b2242	40	0.217933	1.96833	4	84	105	115	116	0.67381	0.452381	0.55	1260	420	40	10	17	22	15	40	9	19	9	59	7	13	26	30	23	23	18	28	9	2	49.024	0.55	0	0	0	0	0	0	419	0	0	0	0	0	0	129
CRNDtex_b0241	57	0.045701	0.726706	0	70	118	72	92	0.502841	0.372159	0.465909	1056	352	31	0	31	14	21	37	1	14	25	23	9	27	3	17	12	21	24	16	3	22	46.295	0.669	3	3	3	3	3	3	351	0	0	0	0	0	0	0
MCITD_b0334	128	0.0860169	0.881622	0	69	83	137	195	0.617769	0.404959	0.68595	1452	484	55	7	30	30	19	28	10	30	21	42	13	20	23	19	30	19	27	36	7	17	39.336	0.687	0	0	0	0	0	0	483	3	1	1	0	4.27e-05	4.27e-05	209
ABTA_b2662	138	0.0643156	1.11346	1	40	83	160	144	0.651054	0.416862	0.711944	1281	427	54	8	21	29	14	42	12	29	21	41	11	13	20	17	20	15	18	28	1	12	39.778	0.661	2	2	2	2	2	2	426	3	10	0.296108	0.000831	4.27e-05	4.27e-05	302
PPALtex_b0241	57	0.045701	0.726706	0	70	118	72	92	0.502841	0.372159	0.465909	1056	352	31	0	31	14	21	37	1	14	25	23	9	27	3	17	12	21	24	16	3	22	46.295	0.669	3	3	3	3	3	3	351	0	0	0	0	0	0	0
BWCOGDS2_b3857	129	0.0333441	0.590415	0	48	60	52	35	0.666667	0.389744	0.446154	585	195	19	2	12	12	5	15	8	6	7	22	7	8	11	9	12	5	7	19	4	4	50.205	0.536	0	0	0	0	0	0	194	0	0	0	0	0	0	0
ARBtex_b0929	44	1.53858	2.15677	0	56	129	52	126	0.556474	0.385675	0.490358	1089	363	34	0	27	14	19	49	1	14	19	23	5	32	5	13	12	16	22	26	2	29	37.082	0.832	3	3	3	3	3	3	362	0	0	0	0	0	0	0
GPDDA1_b3449	105	0.110683	0.785986	0	38	49	90	71	0.612903	0.431452	0.649194	744	248	25	4	15	16	5	21	6	12	13	32	8	10	13	7	15	10	11	12	8	4	45.732	0.606	0	0	0	0	0	0	247	0	0	0	0	0	0	0
MMETtex_b2215	64	0.0280042	1.90111	9	51	107	58	152	0.570652	0.377717	0.570652	1104	368	29	0	32	11	19	48	1	10	17	27	4	32	4	21	13	17	24	25	4	29	29.032	0.898	3	3	3	3	3	3	367	0	0	0	0	0	0	0
NOVBCNtpp_b0463	141	0.0342673	0.499558	0	78	103	112	105	0.640704	0.429648	0.545226	1194	398	47	1	22	17	7	32	1	20	23	34	4	17	18	36	17	22	33	36	1	9	46.088	0.66	1	1	1	1	1	1	397	1	1	1	0	2.13e-05	2.13e-05	242
MALTptspp_b2416	315	0.342568	1.34241	0	114	167	148	147	0.619792	0.357639	0.512153	1728	576	63	4	39	60	18	36	8	51	35	58	18	17	15	21	31	26	29	35	2	9	43.52	0.718	0	0	0	0	0	0	575	0	0	0	0	0	0	0
ARGtex_b0929	44	1.53858	2.15677	0	56	129	52	126	0.556474	0.385675	0.490358	1089	363	34	0	27	14	19	49	1	14	19	23	5	32	5	13	12	16	22	26	2	29	37.082	0.832	3	3	3	3	3	3	362	19	11	0.31843	0.00111705	0.000213	0.000213	261
FACOAL100t2pp_b1805	265	0.429143	1.31904	0	95	148	182	137	0.6121	0.355872	0.567616	1686	562	38	4	29	34	20	43	12	24	32	65	15	27	34	24	26	23	27	59	4	21	47.219	0.627	0	0	0	0	0	0	561	0	0	0	0	0	0	0
ADOCBLS_b1992	98	0.173644	0.484855	0	45	70	80	53	0.625	0.443548	0.53629	744	248	29	4	8	8	13	28	5	15	4	46	10	1	5	5	16	13	12	19	3	3	48.318	0.54	0	0	0	0	0	0	247	0	0	0	0	0	0	0
TMAtex_b0241	57	0.045701	0.726706	0	70	118	72	92	0.502841	0.372159	0.465909	1056	352	31	0	31	14	21	37	1	14	25	23	9	27	3	17	12	21	24	16	3	22	46.295	0.669	3	3	3	3	3	3	351	0	0	0	0	0	0	0
HPPPNt2rpp_b0353	31	0.221683	0.804744	4	71	86	171	76	0.59901	0.512376	0.611386	1212	404	62	4	6	6	21	49	0	17	5	70	21	4	19	12	16	28	21	28	7	7	53.137	0.504	1	0	0	0	0	0	403	0	0	0	0	0	0	0
ALCD2x_b1478	111	0.002831	0.920728	0	65	98	79	95	0.635015	0.421365	0.51632	1011	337	41	9	20	20	8	36	10	17	22	25	7	11	9	6	12	15	18	40	2	8	42.913	0.667	1	1	1	1	1	0	336	4	11	0.314748	0	5.34e-05	5.34e-05	261
PHEtex_b1377	49	0.0274733	0.683685	1	68	140	60	110	0.550265	0.399471	0.449735	1134	378	42	0	37	12	19	43	5	9	17	27	9	33	5	14	11	21	24	17	5	27	40.354	0.74	3	3	3	3	3	3	377	5	11	0.31491	0	6.4e-05	6.4e-05	261
FUSAtpp_b0462	199	0.307416	1.82526	0	134	248	363	305	0.584762	0.398095	0.63619	3150	1050	105	2	47	50	54	89	11	72	43	102	42	39	45	48	38	62	67	97	9	27	40.532	0.702	2	2	2	2	2	2	1049	1	1	1	0	2.13e-05	2.13e-05	125
R5PP_b0822	31	0.0348299	0.45942	0	53	78	66	75	0.573529	0.308824	0.518382	816	272	23	1	18	15	15	17	8	18	19	27	8	17	10	13	9	15	7	20	1	10	53.66	0.624	0	0	0	0	0	0	271	1	4	0.444444	0	2.13e-05	2.13e-05	298
HYD1pp_b2722	30	0.0855427	0.753913	0	28	64	115	101	0.62013	0.431818	0.701299	924	308	33	2	7	11	19	28	2	20	5	49	10	4	16	11	13	18	16	31	6	6	33.502	0.692	1	1	1	1	1	1	307	1	13	0.194414	0	2.13e-05	2.13e-05	261
GLGC_b3430	267	0.103423	0.934982	1	77	97	120	138	0.592593	0.388889	0.597222	1296	432	31	9	29	30	15	27	10	25	19	37	14	19	21	13	32	30	12	37	6	15	43.326	0.672	0	0	0	0	0	0	431	27	10	0.308642	1.7e-07	0.000299	0.000299	306
GLYtex_b2215	64	0.0280042	1.90111	9	51	107	58	152	0.570652	0.377717	0.570652	1104	368	29	0	32	11	19	48	1	10	17	27	4	32	4	21	13	17	24	25	4	29	29.032	0.898	3	3	3	3	3	3	367	3	11	0.315234	0.00122116	4.27e-05	4.27e-05	261
SO2tex_b2215	64	0.0280042	1.90111	9	51	107	58	152	0.570652	0.377717	0.570652	1104	368	29	0	32	11	19	48	1	10	17	27	4	32	4	21	13	17	24	25	4	29	29.032	0.898	3	3	3	3	3	3	367	0	0	0	0	0	0	0
CYSS_b2414	437	0.083733	1.4743	1	67	95	73	89	0.589506	0.419753	0.5	972	324	32	1	11	28	8	32	3	27	23	32	6	14	15	9	13	19	22	21	2	5	44.473	0.668	1	1	1	1	1	1	323	162	10	0.327103	0.000113	0.00173963	0.00173963	91
XYLtex_b1377	49	0.0274733	0.683685	1	68	140	60	110	0.550265	0.399471	0.449735	1134	378	42	0	37	12	19	43	5	9	17	27	9	33	5	14	11	21	24	17	5	27	40.354	0.74	3	3	3	3	3	3	377	0	0	0	0	0	0	0
IMPtex_b2215	64	0.0280042	1.90111	9	51	107	58	152	0.570652	0.377717	0.570652	1104	368	29	0	32	11	19	48	1	10	17	27	4	32	4	21	13	17	24	25	4	29	29.032	0.898	3	3	3	3	3	3	367	0	0	0	0	0	0	0
NADH17pp_b2278	438	0.24606	0.910616	0	60	113	227	214	0.592834	0.403909	0.718241	1842	614	69	3	14	15	38	59	15	33	15	99	29	20	18	11	16	33	33	58	16	19	37.379	0.707	0	0	0	0	0	0	613	0	0	0	0	0	0	224
PGPP141pp_b1278	82	0.0324914	0.618938	0	72	65	75	43	0.588235	0.466667	0.462745	765	255	29	2	3	15	11	15	6	16	10	32	5	3	13	11	18	10	15	21	17	2	55.788	0.485	0	0	0	0	0	0	254	3	14	0.108263	0	4.27e-05	4.27e-05	198
NMNAT_b4390	108	42.8744	434.692	6	56	96	138	121	0.554745	0.343066	0.63017	1233	411	26	4	25	33	25	25	10	25	24	36	11	14	15	22	22	23	20	25	6	19	44.353	0.657	0	0	0	0	0	0	410	1	13	0.165384	0	2.13e-05	2.13e-05	241
CLtex_b0929	44	1.53858	2.15677	0	56	129	52	126	0.556474	0.385675	0.490358	1089	363	34	0	27	14	19	49	1	14	19	23	5	32	5	13	12	16	22	26	2	29	37.082	0.832	3	3	3	3	3	3	362	336	9	0.424022	0.000798	0.00359666	0.00359666	91
ACACT3r_b3845	151	0.130464	1.47873	1	50	103	130	105	0.659794	0.466495	0.60567	1164	388	57	7	18	20	11	37	12	20	11	36	21	13	16	13	23	23	16	28	2	3	39.064	0.685	2	2	2	2	2	2	387	3	1	1	0	4.27e-05	4.27e-05	17
SUCCt2_3pp_b4123	82	0.0966133	0.659513	0	58	116	141	132	0.561521	0.395973	0.610738	1341	447	48	5	15	12	23	38	6	50	16	53	16	10	22	10	12	27	19	43	6	15	42.419	0.685	1	1	1	1	1	1	446	0	0	0	0	0	0	308
A5PISO_b2708	36	0.101539	0.470435	0	56	62	105	99	0.649068	0.437888	0.63354	966	322	41	3	18	17	8	30	8	18	13	39	15	8	12	12	17	18	19	22	1	2	40.835	0.664	1	1	1	1	1	1	321	202	10	0.379963	0.000541	0.00216653	0.00216653	306
PTAr_b2297	230	0.469977	1.24763	1	99	188	191	237	0.632168	0.434965	0.598601	2145	715	76	6	37	48	17	45	7	43	28	65	18	32	37	28	43	50	51	66	3	14	33.135	0.833	1	1	1	1	1	1	714	1	1	1	0	2.13e-05	2.13e-05	16
CRNDtex_b0929	44	1.53858	2.15677	0	56	129	52	126	0.556474	0.385675	0.490358	1089	363	34	0	27	14	19	49	1	14	19	23	5	32	5	13	12	16	22	26	2	29	37.082	0.832	3	3	3	3	3	3	362	0	0	0	0	0	0	0
DDGLCNtex_b1377	49	0.0274733	0.683685	1	68	140	60	110	0.550265	0.399471	0.449735	1134	378	42	0	37	12	19	43	5	9	17	27	9	33	5	14	11	21	24	17	5	27	40.354	0.74	3	3	3	3	3	3	377	0	0	0	0	0	0	0
ACMANAptspp_b1819	121	0.238118	1.04384	3	46	73	75	90	0.59507	0.40493	0.580986	852	284	22	3	9	10	18	32	3	20	11	37	9	11	12	11	14	9	18	23	5	6	42.213	0.734	0	0	0	0	0	0	283	0	0	0	0	0	0	0
DHAD2_b3771	579	0.52754	1.01392	0	88	145	168	216	0.622366	0.445705	0.622366	1851	617	70	12	46	28	16	63	11	34	32	55	22	22	22	23	31	42	32	39	3	13	40.212	0.72	0	0	0	0	0	0	616	172	10	0.375882	0.000138	0.00184636	0.00184636	91
ILEabcpp_b3454	391	0.832839	1.03879	3	27	48	95	68	0.634454	0.382353	0.684874	714	238	21	1	12	18	9	22	5	17	8	27	9	8	6	14	17	10	12	15	2	4	43.799	0.608	0	0	0	0	0	0	237	1	13	0.19429	0	2.13e-05	2.13e-05	261
MPTG2_b0149	112	0.131459	0.680924	0	119	210	312	204	0.628402	0.415385	0.610651	2535	845	68	2	52	38	25	66	5	38	40	83	27	35	52	63	60	50	40	57	13	30	39.543	0.669	1	1	0	0	0	0	844	37	10	0.314587	4.54e-05	0.000406	0.000406	306
CRNCAR_b0036	73	0.048316	0.808497	2	53	66	72	71	0.641221	0.435115	0.545802	786	262	36	1	14	22	13	23	3	16	11	25	7	10	15	4	15	13	8	17	3	5	39.759	0.667	2	2	2	2	2	1	261	0	0	0	0	0	0	0
AGM4PApp_b2435	66	0.234928	1.13038	6	66	75	74	75	0.562069	0.417241	0.513793	870	290	31	0	14	12	11	21	13	16	29	28	4	11	9	8	16	25	18	19	1	3	46.888	0.6	2	2	2	2	2	2	289	4	12	0.246033	0.00166103	5.34e-05	5.34e-05	306
ZN2t3pp_b3915	77	0.142359	0.60213	0	47	88	115	51	0.58804	0.425249	0.551495	903	301	31	2	16	9	9	20	9	25	3	38	11	4	11	16	18	28	12	24	6	8	49.348	0.5	0	0	0	0	0	0	300	0	0	0	0	0	0	334
KARA1_b3774	411	1.16933	2.27773	12	84	106	159	143	0.617886	0.382114	0.613821	1476	492	50	6	26	42	16	46	7	28	33	45	21	16	17	21	21	21	22	31	5	17	36.66	0.791	0	0	0	0	0	0	491	162	10	0.374389	1.9e-05	0.00173963	0.00173963	91
CRNt7pp_b0040	42	0.0500286	1.04885	0	68	109	149	179	0.481188	0.423762	0.649505	1515	505	40	11	11	17	37	39	3	47	17	58	18	16	24	8	16	29	32	40	23	18	46.285	0.64	0	0	0	0	0	0	504	0	0	0	0	0	0	0
MDH2_b2210	156	0.0220683	0.970293	0	91	117	195	146	0.588342	0.411658	0.621129	1647	549	55	0	25	35	19	41	8	21	32	51	18	24	24	31	26	40	30	45	10	13	43.4	0.641	0	0	0	0	0	0	548	1	10	0.295894	0	2.13e-05	2.13e-05	302
MDDCP4pp_b2010	43	0.359791	0.829301	0	64	134	105	86	0.586118	0.401028	0.491003	1167	389	32	1	25	23	14	33	16	22	20	35	10	15	13	16	22	25	21	26	8	11	51.584	0.584	2	2	2	2	2	2	388	11	10	0.314829	2.04e-06	0.000128	0.000128	306
FUMt2_2pp_b3528	176	0.0628768	1.03015	0	59	107	130	133	0.564103	0.37296	0.613054	1287	429	44	4	14	12	25	42	6	47	21	52	15	11	11	13	10	26	22	43	1	9	41.963	0.64	1	1	1	1	1	1	428	0	0	0	0	0	0	0
ACt4pp_b4067	168	0.341749	2.10565	1	57	113	186	194	0.567273	0.414545	0.690909	1650	550	70	2	11	16	42	58	9	46	16	66	23	18	13	11	21	30	26	44	8	19	39.217	0.684	0	0	0	0	0	0	549	1	13	0.19337	0	2.13e-05	2.13e-05	261
GALTptspp_b2415	225	0.0245069	1.24341	4	18	22	22	24	0.593023	0.395349	0.534884	258	86	9	0	1	9	4	6	2	3	7	8	2	2	2	6	1	6	10	7	0	0	38.988	0.805	1	1	1	0	0	0	85	0	0	0	0	0	0	0
CRNDabcpp_b2678	184	0.0864085	1.07266	0	31	90	128	106	0.619718	0.464789	0.659155	1065	355	38	1	15	3	13	34	3	34	4	42	14	9	26	14	17	15	25	35	9	3	45.82	0.623	0	0	0	0	0	0	354	0	0	0	0	0	0	71
FADRx_b3844	56	0.109404	0.751612	0	35	69	75	55	0.615385	0.41453	0.555556	702	234	23	3	17	18	10	16	7	17	7	21	7	4	9	6	19	10	13	16	3	7	48.522	0.614	0	0	0	0	0	0	233	3	10	0.354867	2.87e-07	4.27e-05	4.27e-05	302
RMNtpp_b3907	46	0.185124	0.909955	0	45	79	116	105	0.492754	0.417391	0.64058	1035	345	35	5	5	7	18	39	5	34	15	41	19	14	10	3	9	22	12	27	12	12	48.933	0.594	0	0	0	0	0	0	344	0	0	0	0	0	0	0
CHLtex_b2215	64	0.0280042	1.90111	9	51	107	58	152	0.570652	0.377717	0.570652	1104	368	29	0	32	11	19	48	1	10	17	27	4	32	4	21	13	17	24	25	4	29	29.032	0.898	3	3	3	3	3	3	367	0	0	0	0	0	0	0
MANGLYCptspp_b2415	225	0.0245069	1.24341	4	18	22	22	24	0.593023	0.395349	0.534884	258	86	9	0	1	9	4	6	2	3	7	8	2	2	2	6	1	6	10	7	0	0	38.988	0.805	1	1	1	0	0	0	85	0	0	0	0	0	0	0
PROGLYabcpp_b3540	219	0.639972	1.00568	0	45	70	128	92	0.650746	0.376119	0.656716	1005	335	20	6	18	19	9	24	7	13	20	41	12	11	23	26	24	17	12	22	0	10	45.043	0.657	12	12	12	12	12	12	334	0	0	0	0	0	0	0
UDPACGALtex_b0929	44	1.53858	2.15677	0	56	129	52	126	0.556474	0.385675	0.490358	1089	363	34	0	27	14	19	49	1	14	19	23	5	32	5	13	12	16	22	26	2	29	37.082	0.832	3	3	3	3	3	3	362	0	0	0	0	0	0	0
BUTSO3tex_b0929	44	1.53858	2.15677	0	56	129	52	126	0.556474	0.385675	0.490358	1089	363	34	0	27	14	19	49	1	14	19	23	5	32	5	13	12	16	22	26	2	29	37.082	0.832	3	3	3	3	3	3	362	0	0	0	0	0	0	0
DINStex_b0929	44	1.53858	2.15677	0	56	129	52	126	0.556474	0.385675	0.490358	1089	363	34	0	27	14	19	49	1	14	19	23	5	32	5	13	12	16	22	26	2	29	37.082	0.832	3	3	3	3	3	3	362	0	0	0	0	0	0	0
VALt2rpp_b2683	32	0.0444177	0.627471	0	18	27	32	35	0.589286	0.446429	0.598214	336	112	12	2	2	2	4	9	1	9	3	18	3	2	5	0	8	6	7	12	1	5	42.412	0.557	0	0	0	0	0	0	111	3	12	0.239679	0.000831	4.27e-05	4.27e-05	261
GLYALDtex_b1377	49	0.0274733	0.683685	1	68	140	60	110	0.550265	0.399471	0.449735	1134	378	42	0	37	12	19	43	5	9	17	27	9	33	5	14	11	21	24	17	5	27	40.354	0.74	3	3	3	3	3	3	377	5	11	0.31491	1.28e-06	6.4e-05	6.4e-05	261
TRPtex_b0929	44	1.53858	2.15677	0	56	129	52	126	0.556474	0.385675	0.490358	1089	363	34	0	27	14	19	49	1	14	19	23	5	32	5	13	12	16	22	26	2	29	37.082	0.832	3	3	3	3	3	3	362	3	11	0.314667	0	4.27e-05	4.27e-05	261
LPLIPAL1A160pp_b0494	210	0.032285	0.623363	0	31	51	67	60	0.593301	0.382775	0.607656	627	209	22	0	12	7	11	10	4	7	8	29	7	11	14	17	11	11	6	10	6	5	46.887	0.587	0	0	0	0	0	0	208	2	10	0.179935	0	3.2e-05	3.2e-05	198
SERtex_b1377	49	0.0274733	0.683685	1	68	140	60	110	0.550265	0.399471	0.449735	1134	378	42	0	37	12	19	43	5	9	17	27	9	33	5	14	11	21	24	17	5	27	40.354	0.74	3	3	3	3	3	3	377	5	11	0.315559	3.1e-06	6.4e-05	6.4e-05	261
CYTDK2_b2066	200	0.121721	0.700073	0	34	59	60	61	0.556075	0.341121	0.565421	642	214	12	3	15	15	6	10	7	20	13	20	8	4	8	10	15	16	9	14	0	8	44.012	0.631	0	0	0	0	0	0	213	0	0	0	0	0	0	84
G3PD6_b2241	75	21.961	221.894	6	85	140	135	183	0.661142	0.473297	0.585635	1629	543	59	14	32	36	9	46	14	37	14	54	8	18	21	17	48	26	36	39	6	8	43.998	0.662	0	0	0	0	0	0	542	0	0	0	0	0	0	129
ISETACtex_b2215	64	0.0280042	1.90111	9	51	107	58	152	0.570652	0.377717	0.570652	1104	368	29	0	32	11	19	48	1	10	17	27	4	32	4	21	13	17	24	25	4	29	29.032	0.898	3	3	3	3	3	3	367	0	0	0	0	0	0	0
SELtpp_b2425	85	0.298743	1.753	7	54	57	115	113	0.566372	0.374631	0.672566	1017	339	31	0	21	17	16	24	5	12	28	33	5	23	14	17	11	19	20	24	7	11	37.714	0.735	1	1	1	1	1	1	338	0	0	0	0	0	0	0
PPAtex_b0241	57	0.045701	0.726706	0	70	118	72	92	0.502841	0.372159	0.465909	1056	352	31	0	31	14	21	37	1	14	25	23	9	27	3	17	12	21	24	16	3	22	46.295	0.669	3	3	3	3	3	3	351	0	0	0	0	0	0	0
NOtex_b0241	57	0.045701	0.726706	0	70	118	72	92	0.502841	0.372159	0.465909	1056	352	31	0	31	14	21	37	1	14	25	23	9	27	3	17	12	21	24	16	3	22	46.295	0.669	3	3	3	3	3	3	351	0	0	0	0	0	0	0
PHETA1_b3770	353	0.467189	0.700141	0	51	71	90	98	0.612903	0.429032	0.606452	930	310	28	3	16	22	13	30	8	20	12	21	8	10	13	10	18	20	15	25	6	11	41.187	0.738	0	0	0	0	0	0	309	162	10	0.37416	0.000425	0.00173963	0.00173963	91
2AGPE161tipp_b2835	60	0.122308	0.614945	0	50	93	149	106	0.580402	0.444724	0.640704	1194	398	57	4	4	9	20	43	4	26	12	57	14	16	14	10	10	22	18	38	9	10	50.482	0.583	0	0	0	0	0	0	397	5	8	0.268523	0.00149748	6.4e-05	6.4e-05	198
CRNtex_b0929	44	1.53858	2.15677	0	56	129	52	126	0.556474	0.385675	0.490358	1089	363	34	0	27	14	19	49	1	14	19	23	5	32	5	13	12	16	22	26	2	29	37.082	0.832	3	3	3	3	3	3	362	0	0	0	0	0	0	0
TSULtex_b0241	57	0.045701	0.726706	0	70	118	72	92	0.502841	0.372159	0.465909	1056	352	31	0	31	14	21	37	1	14	25	23	9	27	3	17	12	21	24	16	3	22	46.295	0.669	3	3	3	3	3	3	351	0	0	0	0	0	0	0
4PEPTabcpp_b1247	286	0.659676	0.914006	0	61	88	104	82	0.602985	0.38806	0.555224	1005	335	22	7	15	23	8	24	10	23	19	40	10	8	24	13	20	16	13	28	4	7	50.479	0.56	11	11	11	11	11	11	334	1	13	0.197485	0	2.13e-05	2.13e-05	306
G3PSabcpp_b3453	108	0.119204	1.28774	0	68	83	151	137	0.544419	0.410023	0.656036	1317	439	47	2	23	27	20	36	5	14	37	33	14	23	24	21	11	25	27	20	8	21	40.497	0.679	0	0	0	0	0	0	438	0	0	0	0	0	0	0
CBL1abcpp_b1711	193	0.0248881	0.598284	0	61	77	112	77	0.608563	0.477064	0.577982	981	327	43	8	5	6	9	33	3	22	1	69	11	6	13	13	19	15	11	23	14	2	53.319	0.483	2	2	2	2	2	1	326	350	9	0.427127	0.00299896	0.00374608	0.00374608	306
SULabcpp_b2422	204	0.198418	1.65513	8	49	81	133	103	0.70765	0.407104	0.644809	1098	366	32	0	19	24	15	27	14	15	11	42	7	8	19	24	31	16	18	31	5	7	39.016	0.683	17	17	17	17	17	16	365	7	11	0.314991	333000000	8.54e-05	8.54e-05	91
PUNP4_b2407	245	0.149857	0.85186	2	45	81	86	66	0.597122	0.406475	0.546763	834	278	27	6	11	16	16	27	8	17	12	27	10	10	13	8	11	15	13	24	0	6	47.137	0.604	0	0	0	0	0	0	277	2	1	1	6.79e-07	3.2e-05	3.2e-05	290
ALLTNtex_b0929	44	1.53858	2.15677	0	56	129	52	126	0.556474	0.385675	0.490358	1089	363	34	0	27	14	19	49	1	14	19	23	5	32	5	13	12	16	22	26	2	29	37.082	0.832	3	3	3	3	3	3	362	5	11	0.315315	0.000169	6.4e-05	6.4e-05	261
DSBDR_b4136	108	0.141265	0.553314	0	98	122	177	169	0.59894	0.422261	0.611307	1698	566	62	8	21	15	32	44	9	29	16	79	14	13	31	43	19	24	39	40	11	16	46.635	0.563	0	0	0	0	0	0	565	0	0	0	0	0	0	0
ACACT7r_b3845	151	0.130464	1.47873	1	50	103	130	105	0.659794	0.466495	0.60567	1164	388	57	7	18	20	11	37	12	20	11	36	21	13	16	13	23	23	16	28	2	3	39.064	0.685	2	2	2	2	2	2	387	2	1	1	0	3.2e-05	3.2e-05	96
Kt3pp_b0842	33	0.239994	1.02413	0	61	102	154	94	0.554745	0.413625	0.603406	1233	411	47	4	6	14	21	42	4	35	10	67	18	13	13	16	15	23	16	26	10	10	44.994	0.566	0	0	0	0	0	0	410	0	0	0	0	0	0	191
ACACT8r_b2342	127	0.202332	1.34639	2	82	117	128	110	0.649886	0.480549	0.544622	1311	437	63	2	19	23	13	39	9	19	13	46	16	10	19	18	31	25	28	32	3	8	51.067	0.599	2	2	2	2	2	2	436	2	1	1	0	3.2e-05	3.2e-05	175
BALAtex_b0241	57	0.045701	0.726706	0	70	118	72	92	0.502841	0.372159	0.465909	1056	352	31	0	31	14	21	37	1	14	25	23	9	27	3	17	12	21	24	16	3	22	46.295	0.669	3	3	3	3	3	3	351	0	0	0	0	0	0	0
CLPNS141pp_b0789	74	0.216763	0.648401	0	74	93	128	119	0.649758	0.386473	0.596618	1242	414	37	2	22	30	17	26	15	22	16	42	9	18	21	19	38	12	14	30	9	14	45.21	0.594	0	0	0	0	0	0	413	1	1	1	0	2.13e-05	2.13e-05	66
ALAtex_b2215	64	0.0280042	1.90111	9	51	107	58	152	0.570652	0.377717	0.570652	1104	368	29	0	32	11	19	48	1	10	17	27	4	32	4	21	13	17	24	25	4	29	29.032	0.898	3	3	3	3	3	3	367	2	11	0.314587	0	3.2e-05	3.2e-05	261
LPLIPAL2ATG160_b3825	63	0.201587	0.617796	0	60	99	89	93	0.648094	0.431085	0.533724	1023	341	33	3	23	18	21	26	16	18	5	26	8	10	17	14	36	11	14	24	7	10	54.742	0.58	0	0	0	0	0	0	340	0	0	0	0	0	0	0
SO2tex_b1377	49	0.0274733	0.683685	1	68	140	60	110	0.550265	0.399471	0.449735	1134	378	42	0	37	12	19	43	5	9	17	27	9	33	5	14	11	21	24	17	5	27	40.354	0.74	3	3	3	3	3	3	377	0	0	0	0	0	0	0
NTD1pp_b0480	71	0.26015	0.883051	0	100	142	176	133	0.597096	0.368421	0.560799	1653	551	48	2	38	35	19	50	10	28	41	44	16	27	26	28	20	21	29	40	7	21	41.884	0.666	0	0	0	0	0	0	550	0	0	0	0	0	0	0
GLYBabcpp_b2128	144	0.135914	0.895163	1	36	58	95	55	0.647541	0.463115	0.614754	732	244	38	0	3	6	13	21	2	24	4	33	4	2	16	11	10	11	13	24	4	4	50.143	0.567	0	0	0	0	0	0	243	0	0	0	0	0	0	0
NADPHQR4_b3028	88	0.0806958	0.648164	0	37	46	45	66	0.582474	0.360825	0.572165	582	194	12	0	16	9	10	18	6	9	14	14	7	8	9	6	7	7	11	16	6	8	43.951	0.73	0	0	0	0	0	0	193	1	15	0.140369	0	2.13e-05	2.13e-05	261
TREptspp_b4240	87	0.037509	1.32086	0	58	105	160	151	0.575949	0.398734	0.656118	1422	474	44	6	11	11	21	49	8	50	14	57	18	15	25	25	16	23	19	39	7	15	44.218	0.623	0	0	0	0	0	0	473	0	0	0	0	0	0	0
NADH16pp_b2281	361	0.0217583	0.774597	0	35	30	49	67	0.569061	0.41989	0.640884	543	181	12	9	9	18	8	14	1	10	11	15	6	4	13	4	13	5	8	9	2	9	38.494	0.714	2	1	1	0	0	0	180	1	10	0.295894	0	2.13e-05	2.13e-05	302
ACACT7r_b2342	127	0.202332	1.34639	2	82	117	128	110	0.649886	0.480549	0.544622	1311	437	63	2	19	23	13	39	9	19	13	46	16	10	19	18	31	25	28	32	3	8	51.067	0.599	2	2	2	2	2	2	436	2	1	1	0	3.2e-05	3.2e-05	96
MALTPTabcpp_b4035	138	0.557362	0.951593	0	68	82	118	104	0.682796	0.365591	0.596774	1116	372	28	3	17	26	11	28	10	21	15	40	11	13	20	22	24	17	14	43	2	6	47.748	0.646	12	12	12	12	12	12	371	0	0	0	0	0	0	0
GLCP_b3428	220	0.0462657	1.03225	0	109	210	263	234	0.574755	0.345588	0.609069	2448	816	58	5	53	54	30	48	26	50	37	87	19	49	28	36	46	48	35	54	14	38	43.43	0.675	1	1	1	1	1	1	815	0	0	0	0	0	0	139
ASPK_b4024	56	0.354008	0.966105	2	82	119	124	125	0.637778	0.424444	0.553333	1350	450	50	5	22	35	18	30	8	24	11	63	8	18	15	9	29	30	30	38	2	4	46.907	0.642	0	0	0	0	0	0	449	179	10	0.329922	0.000393	0.00192107	0.00192107	91
LPLIPAL2G181_b3825	63	0.201587	0.617796	0	60	99	89	93	0.648094	0.431085	0.533724	1023	341	33	3	23	18	21	26	16	18	5	26	8	10	17	14	36	11	14	24	7	10	54.742	0.58	0	0	0	0	0	0	340	4	10	0.180678	0.00072	5.34e-05	5.34e-05	198
DGSNtex_b1377	49	0.0274733	0.683685	1	68	140	60	110	0.550265	0.399471	0.449735	1134	378	42	0	37	12	19	43	5	9	17	27	9	33	5	14	11	21	24	17	5	27	40.354	0.74	3	3	3	3	3	3	377	0	0	0	0	0	0	0
ETHAtex_b0241	57	0.045701	0.726706	0	70	118	72	92	0.502841	0.372159	0.465909	1056	352	31	0	31	14	21	37	1	14	25	23	9	27	3	17	12	21	24	16	3	22	46.295	0.669	3	3	3	3	3	3	351	3	10	0.321438	0.000873	4.27e-05	4.27e-05	198
AMPTASECG_b0932	214	0.19073	1.03237	0	114	224	274	259	0.615385	0.376579	0.61194	2613	871	87	8	62	60	40	38	22	41	35	93	21	44	37	42	53	41	50	52	13	31	41.067	0.702	0	0	0	0	0	0	870	2	13	0.194198	0	3.2e-05	3.2e-05	261
ACACtex_b2215	64	0.0280042	1.90111	9	51	107	58	152	0.570652	0.377717	0.570652	1104	368	29	0	32	11	19	48	1	10	17	27	4	32	4	21	13	17	24	25	4	29	29.032	0.898	3	3	3	3	3	3	367	0	0	0	0	0	0	0
CADVtpp_b4132	16	0.0316932	1.15933	0	64	163	102	116	0.523596	0.469663	0.489888	1335	445	59	8	9	7	22	45	7	38	12	45	20	19	16	6	8	34	28	37	11	13	42.732	0.724	1	1	1	1	1	1	444	6	11	0.315396	0.000255	7.47e-05	7.47e-05	261
SPMS_b0121	201	0.0248158	1.39053	0	46	80	61	102	0.591696	0.366782	0.564014	867	289	26	6	20	15	18	21	15	18	9	21	7	11	10	16	11	14	16	19	2	13	44.106	0.692	0	0	0	0	0	0	288	37	10	0.357455	6.99e-05	0.000406	0.000406	306
DURIt2pp_b2393	75	0.130365	0.78714	0	58	97	102	144	0.533666	0.349127	0.613466	1203	401	39	1	7	17	31	31	3	39	15	51	18	17	7	10	11	37	11	41	3	11	41.021	0.751	0	0	0	0	0	0	400	0	0	0	0	0	0	0
NTD4pp_b4055	74	0.14684	0.511661	0	47	74	53	64	0.542017	0.44958	0.491597	714	238	23	1	14	11	13	15	3	16	12	14	5	15	16	8	13	20	13	16	5	4	52.306	0.599	0	0	0	0	0	0	237	0	0	0	0	0	0	0
ACMUMptspp_b2416	315	0.342568	1.34241	0	114	167	148	147	0.619792	0.357639	0.512153	1728	576	63	4	39	60	18	36	8	51	35	58	18	17	15	21	31	26	29	35	2	9	43.52	0.718	0	0	0	0	0	0	575	0	0	0	0	0	0	0
NTD3_b2744	420	0.227363	0.722778	0	37	82	73	62	0.637795	0.472441	0.531496	762	254	24	5	21	6	5	25	7	14	5	23	4	11	17	9	15	14	17	23	3	5	42.933	0.589	0	0	0	0	0	0	253	1	1	1	0	2.13e-05	2.13e-05	89
GLYC2Ptex_b1377	49	0.0274733	0.683685	1	68	140	60	110	0.550265	0.399471	0.449735	1134	378	42	0	37	12	19	43	5	9	17	27	9	33	5	14	11	21	24	17	5	27	40.354	0.74	3	3	3	3	3	3	377	0	0	0	0	0	0	0
PLIPA1A141pp_b3821	101	0.0282509	0.656571	0	38	73	92	87	0.524138	0.396552	0.617241	870	290	18	0	16	15	10	23	5	9	10	29	8	20	13	12	13	19	18	18	10	23	46.721	0.641	0	0	0	0	0	0	289	3	12	0.138262	0	4.27e-05	4.27e-05	198
PYDAMtex_b0929	44	1.53858	2.15677	0	56	129	52	126	0.556474	0.385675	0.490358	1089	363	34	0	27	14	19	49	1	14	19	23	5	32	5	13	12	16	22	26	2	29	37.082	0.832	3	3	3	3	3	3	362	0	0	0	0	0	0	0
GALBDtex_b2215	64	0.0280042	1.90111	9	51	107	58	152	0.570652	0.377717	0.570652	1104	368	29	0	32	11	19	48	1	10	17	27	4	32	4	21	13	17	24	25	4	29	29.032	0.898	3	3	3	3	3	3	367	0	0	0	0	0	0	0
METDtex_b0241	57	0.045701	0.726706	0	70	118	72	92	0.502841	0.372159	0.465909	1056	352	31	0	31	14	21	37	1	14	25	23	9	27	3	17	12	21	24	16	3	22	46.295	0.669	3	3	3	3	3	3	351	0	0	0	0	0	0	0
DHAPT_b2416	315	0.342568	1.34241	0	114	167	148	147	0.619792	0.357639	0.512153	1728	576	63	4	39	60	18	36	8	51	35	58	18	17	15	21	31	26	29	35	2	9	43.52	0.718	0	0	0	0	0	0	575	1	10	0.295894	0	2.13e-05	2.13e-05	302
NTRIR4pp_b4071	54	0.0809899	0.995382	0	31	42	61	55	0.571429	0.433862	0.613757	567	189	13	10	11	7	3	9	11	4	10	15	6	11	15	13	7	14	11	14	2	2	45.678	0.636	0	0	0	0	0	0	188	0	0	0	0	0	0	0
AACPS8_b2836	53	0.183582	0.630585	1	136	179	211	194	0.611111	0.405556	0.5625	2160	720	55	4	30	45	36	55	16	39	38	78	23	13	41	27	51	33	44	61	8	22	47.712	0.603	0	0	0	0	0	0	719	2	1	1	6.79e-07	3.2e-05	3.2e-05	101
PGPP180_b1278	82	0.0324914	0.618938	0	72	65	75	43	0.588235	0.466667	0.462745	765	255	29	2	3	15	11	15	6	16	10	32	5	3	13	11	18	10	15	21	17	2	55.788	0.485	0	0	0	0	0	0	254	2	11	0.150974	0.00220095	3.2e-05	3.2e-05	198
HACD7_b2341	124	0.0138785	1.06552	4	141	202	204	168	0.61958	0.427972	0.52028	2145	715	75	9	30	44	24	69	13	52	40	68	16	20	38	35	44	32	37	53	2	13	52.384	0.575	4	4	4	4	4	2	714	2	1	1	0	3.2e-05	3.2e-05	96
ABUTt2pp_b2663	65	0.0123503	1.04347	0	84	98	129	156	0.492505	0.436831	0.610278	1401	467	50	5	7	14	22	34	6	42	15	60	19	11	19	6	19	38	22	45	16	16	49.169	0.55	3	3	3	3	3	3	466	1	13	0.19337	0	2.13e-05	2.13e-05	261
HYD1pp_b0973	92	0.866275	1.64223	1	71	115	178	234	0.588629	0.41806	0.688963	1794	598	52	12	37	29	21	51	16	41	22	48	16	35	34	26	30	27	28	39	16	17	41.549	0.677	1	1	1	1	1	1	597	1	13	0.194414	0	2.13e-05	2.13e-05	261
DMStex_b1377	49	0.0274733	0.683685	1	68	140	60	110	0.550265	0.399471	0.449735	1134	378	42	0	37	12	19	43	5	9	17	27	9	33	5	14	11	21	24	17	5	27	40.354	0.74	3	3	3	3	3	3	377	0	0	0	0	0	0	0
MLTGY2pp_b2813	109	0.289572	0.649107	0	52	111	103	100	0.601093	0.428962	0.554645	1098	366	32	1	18	15	17	41	8	18	16	23	11	20	20	20	22	23	11	24	6	19	42.004	0.691	0	0	0	0	0	0	365	0	0	0	0	0	0	213
ILEabcpp_b3456	216	0.877167	1.2399	1	43	88	168	127	0.591549	0.413146	0.692488	1278	426	43	2	11	13	34	44	2	25	13	69	17	9	17	11	21	21	20	36	7	10	40.232	0.613	0	0	0	0	0	0	425	1	13	0.19429	0	2.13e-05	2.13e-05	261
ANS_b1264	378	0.734478	1.64663	4	94	140	128	159	0.650672	0.429942	0.550864	1563	521	53	12	35	35	20	29	11	17	15	67	12	17	28	21	40	36	25	33	0	14	45.968	0.63	0	0	0	0	0	0	520	163	10	0.374962	5.31e-05	0.0017503	0.0017503	91
PTA2_b2297	230	0.469977	1.24763	1	99	188	191	237	0.632168	0.434965	0.598601	2145	715	76	6	37	48	17	45	7	43	28	65	18	32	37	28	43	50	51	66	3	14	33.135	0.833	1	1	1	1	1	1	714	2	2	0.75	0	3.2e-05	3.2e-05	15
FADRx2_b2764	146	0.545857	2.14267	8	108	128	174	190	0.661667	0.413333	0.606667	1800	600	71	2	36	49	22	36	9	21	26	61	8	23	32	28	34	31	31	51	11	17	43.616	0.656	0	0	0	0	0	0	599	1	11	0.314506	0	2.13e-05	2.13e-05	261
BALAtex_b0929	44	1.53858	2.15677	0	56	129	52	126	0.556474	0.385675	0.490358	1089	363	34	0	27	14	19	49	1	14	19	23	5	32	5	13	12	16	22	26	2	29	37.082	0.832	3	3	3	3	3	3	362	0	0	0	0	0	0	0
GLDBRAN2_b3431	259	0.0189503	1.04205	0	90	185	185	198	0.618541	0.430091	0.582067	1974	658	65	12	43	35	26	54	32	30	15	69	6	38	43	23	38	25	26	34	19	24	48.955	0.58	0	0	0	0	0	0	657	1	2	0.666667	0	2.13e-05	2.13e-05	140
MDDCP5pp_b2010	43	0.359791	0.829301	0	64	134	105	86	0.586118	0.401028	0.491003	1167	389	32	1	25	23	14	33	16	22	20	35	10	15	13	16	22	25	21	26	8	11	51.584	0.584	2	2	2	2	2	2	388	2	12	0.203117	3.75e-07	3.2e-05	3.2e-05	306
BUTtex_b0241	57	0.045701	0.726706	0	70	118	72	92	0.502841	0.372159	0.465909	1056	352	31	0	31	14	21	37	1	14	25	23	9	27	3	17	12	21	24	16	3	22	46.295	0.669	3	3	3	3	3	3	351	3	11	0.31491	0.000829	4.27e-05	4.27e-05	261
2AGPA161tipp_b2835	60	0.122308	0.614945	0	50	93	149	106	0.580402	0.444724	0.640704	1194	398	57	4	4	9	20	43	4	26	12	57	14	16	14	10	10	22	18	38	9	10	50.482	0.583	0	0	0	0	0	0	397	3	10	0.179909	0	4.27e-05	4.27e-05	198
SELtex_b0241	57	0.045701	0.726706	0	70	118	72	92	0.502841	0.372159	0.465909	1056	352	31	0	31	14	21	37	1	14	25	23	9	27	3	17	12	21	24	16	3	22	46.295	0.669	3	3	3	3	3	3	351	0	0	0	0	0	0	0
DALAtex_b2215	64	0.0280042	1.90111	9	51	107	58	152	0.570652	0.377717	0.570652	1104	368	29	0	32	11	19	48	1	10	17	27	4	32	4	21	13	17	24	25	4	29	29.032	0.898	3	3	3	3	3	3	367	10	11	0.321269	2.78e-05	0.000117	0.000117	306
PPND_b2600	124	0.166923	0.968224	1	61	112	133	68	0.668449	0.363636	0.537433	1122	374	35	3	22	28	14	24	9	19	15	47	11	8	17	22	27	20	5	32	5	10	46.168	0.601	1	0	0	0	0	0	373	161	10	0.326232	0.000422	0.00172896	0.00172896	91
Zn2tex_b0929	44	1.53858	2.15677	0	56	129	52	126	0.556474	0.385675	0.490358	1089	363	34	0	27	14	19	49	1	14	19	23	5	32	5	13	12	16	22	26	2	29	37.082	0.832	3	3	3	3	3	3	362	336	9	0.424022	0.000798	0.00359666	0.00359666	91
LPLIPAL2E120_b3825	63	0.201587	0.617796	0	60	99	89	93	0.648094	0.431085	0.533724	1023	341	33	3	23	18	21	26	16	18	5	26	8	10	17	14	36	11	14	24	7	10	54.742	0.58	0	0	0	0	0	0	340	5	10	0.189131	0.0197018	6.4e-05	6.4e-05	198
CRNabcpp_b2677	196	0.0883796	1.01255	0	96	109	95	101	0.618454	0.36409	0.488778	1203	401	36	1	27	29	13	32	6	31	20	45	13	14	15	21	27	20	14	28	0	8	47.863	0.524	18	18	18	18	18	17	400	1	2	0.666667	0	2.13e-05	2.13e-05	73
PPTtex_b2215	64	0.0280042	1.90111	9	51	107	58	152	0.570652	0.377717	0.570652	1104	368	29	0	32	11	19	48	1	10	17	27	4	32	4	21	13	17	24	25	4	29	29.032	0.898	3	3	3	3	3	3	367	0	0	0	0	0	0	0
PTRCtex_b0241	57	0.045701	0.726706	0	70	118	72	92	0.502841	0.372159	0.465909	1056	352	31	0	31	14	21	37	1	14	25	23	9	27	3	17	12	21	24	16	3	22	46.295	0.669	3	3	3	3	3	3	351	3	11	0.315234	0.000896	4.27e-05	4.27e-05	261
THRt4pp_b3089	91	0.434645	1.05399	0	49	103	140	123	0.583133	0.438554	0.633735	1245	415	49	8	11	7	18	33	5	28	9	66	13	20	17	8	14	32	24	42	5	5	44.453	0.67	0	0	0	0	0	0	414	2	10	0.311546	1.05e-06	3.2e-05	3.2e-05	302
FEENTERabcpp_b0588	253	0.365131	1.07653	0	55	70	87	60	0.632353	0.444853	0.540441	816	272	28	3	12	19	2	21	10	18	8	33	6	6	12	13	18	11	24	16	4	7	48.946	0.57	2	2	2	2	2	2	271	7	11	0.315315	4.02e-06	8.54e-05	8.54e-05	261
ACONTb_b1276	370	0.122075	1.24331	0	176	231	243	242	0.616592	0.42713	0.543722	2676	892	77	7	57	55	23	78	18	43	43	84	25	33	50	27	51	51	54	73	13	29	49.893	0.602	0	0	0	0	0	0	891	186	10	0.331171	0.0010644	0.00199577	0.00199577	91
DURIt2pp_b2964	18	0.0429157	0.914842	0	52	100	131	136	0.470167	0.384248	0.637232	1257	419	37	4	10	7	38	30	7	40	14	47	24	12	13	15	7	32	28	30	10	13	43.146	0.717	1	1	1	1	1	1	418	0	0	0	0	0	0	0
CYTDtex_b2215	64	0.0280042	1.90111	9	51	107	58	152	0.570652	0.377717	0.570652	1104	368	29	0	32	11	19	48	1	10	17	27	4	32	4	21	13	17	24	25	4	29	29.032	0.898	3	3	3	3	3	3	367	3	11	0.31491	0.000829	4.27e-05	4.27e-05	261
TTRCYCtex_b2215	64	0.0280042	1.90111	9	51	107	58	152	0.570652	0.377717	0.570652	1104	368	29	0	32	11	19	48	1	10	17	27	4	32	4	21	13	17	24	25	4	29	29.032	0.898	3	3	3	3	3	3	367	1	1	1	0	2.13e-05	2.13e-05	326
GALCTNtex_b0929	44	1.53858	2.15677	0	56	129	52	126	0.556474	0.385675	0.490358	1089	363	34	0	27	14	19	49	1	14	19	23	5	32	5	13	12	16	22	26	2	29	37.082	0.832	3	3	3	3	3	3	362	0	0	0	0	0	0	0
GLCURtex_b0241	57	0.045701	0.726706	0	70	118	72	92	0.502841	0.372159	0.465909	1056	352	31	0	31	14	21	37	1	14	25	23	9	27	3	17	12	21	24	16	3	22	46.295	0.669	3	3	3	3	3	3	351	0	0	0	0	0	0	0
GLYC3Ptex_b0241	57	0.045701	0.726706	0	70	118	72	92	0.502841	0.372159	0.465909	1056	352	31	0	31	14	21	37	1	14	25	23	9	27	3	17	12	21	24	16	3	22	46.295	0.669	3	3	3	3	3	3	351	2	11	0.314587	0	3.2e-05	3.2e-05	261
GLYCTO3_b2979	295	0.164097	1.06405	0	77	116	143	164	0.674	0.412	0.614	1500	500	49	10	30	38	16	49	16	29	14	60	11	17	29	12	29	20	18	41	1	10	48.373	0.605	0	0	0	0	0	0	499	0	0	0	0	0	0	157
ACGAMT_b3784	48	0.0457377	0.839812	0	48	113	93	114	0.519022	0.402174	0.5625	1104	368	34	5	12	4	29	32	7	36	15	47	14	7	12	6	21	19	17	29	8	13	51.72	0.58	0	0	0	0	0	0	367	45	11	0.325452	0.000102	0.000491	0.000491	306
PACCOAE_b1392	176	0.21147	0.874725	0	65	92	106	94	0.605042	0.434174	0.560224	1071	357	35	9	22	22	13	26	6	17	15	36	11	6	15	21	25	21	23	21	0	12	44.701	0.603	0	0	0	0	0	0	356	0	0	0	0	0	0	0
CA2tex_b0241	57	0.045701	0.726706	0	70	118	72	92	0.502841	0.372159	0.465909	1056	352	31	0	31	14	21	37	1	14	25	23	9	27	3	17	12	21	24	16	3	22	46.295	0.669	3	3	3	3	3	3	351	336	9	0.424022	0.000798	0.00359666	0.00359666	91
ALLPI_b4090	375	0.0274267	0.697473	1	33	50	38	29	0.633333	0.426667	0.446667	450	150	17	3	6	10	4	17	6	12	6	9	2	4	2	7	9	8	5	16	2	4	56.935	0.527	0	0	0	0	0	0	149	0	0	0	0	0	0	0
PROGLYtex_b2215	64	0.0280042	1.90111	9	51	107	58	152	0.570652	0.377717	0.570652	1104	368	29	0	32	11	19	48	1	10	17	27	4	32	4	21	13	17	24	25	4	29	29.032	0.898	3	3	3	3	3	3	367	0	0	0	0	0	0	0
SULRi_b2763	145	0.376897	2.19522	6	74	113	197	187	0.607706	0.401051	0.672504	1713	571	47	6	30	46	20	49	17	38	35	52	14	30	27	15	41	16	35	30	8	14	39.77	0.691	0	0	0	0	0	0	570	168	10	0.375767	0.000641	0.00180367	0.00180367	91
F6Ptex_b0241	57	0.045701	0.726706	0	70	118	72	92	0.502841	0.372159	0.465909	1056	352	31	0	31	14	21	37	1	14	25	23	9	27	3	17	12	21	24	16	3	22	46.295	0.669	3	3	3	3	3	3	351	0	0	0	0	0	0	0
GSNt2pp_b2964	18	0.0429157	0.914842	0	52	100	131	136	0.470167	0.384248	0.637232	1257	419	37	4	10	7	38	30	7	40	14	47	24	12	13	15	7	32	28	30	10	13	43.146	0.717	1	1	1	1	1	1	418	0	0	0	0	0	0	0
2AGPGAT180_b2836	53	0.183582	0.630585	1	136	179	211	194	0.611111	0.405556	0.5625	2160	720	55	4	30	45	36	55	16	39	38	78	23	13	41	27	51	33	44	61	8	22	47.712	0.603	0	0	0	0	0	0	719	4	9	0.215101	0.00384297	5.34e-05	5.34e-05	198
SKMt2pp_b1981	116	0.443322	0.503926	0	84	130	108	117	0.542141	0.457859	0.512528	1317	439	49	5	9	14	34	45	5	29	8	56	18	8	15	14	22	29	24	30	11	13	53.007	0.529	0	0	0	0	0	0	438	0	0	0	0	0	0	0
GALM2pp_b0756	169	0.248855	0.832511	0	44	91	98	114	0.628242	0.429395	0.610951	1041	347	30	4	28	18	15	30	7	11	12	35	3	16	21	19	18	23	18	19	5	14	45.679	0.651	0	0	0	0	0	0	346	0	0	0	0	0	0	0
MEOHtex_b2215	64	0.0280042	1.90111	9	51	107	58	152	0.570652	0.377717	0.570652	1104	368	29	0	32	11	19	48	1	10	17	27	4	32	4	21	13	17	24	25	4	29	29.032	0.898	3	3	3	3	3	3	367	303	9	0.420096	0.00129598	0.00324447	0.00324447	91
NTD6pp_b4055	74	0.14684	0.511661	0	47	74	53	64	0.542017	0.44958	0.491597	714	238	23	1	14	11	13	15	3	16	12	14	5	15	16	8	13	20	13	16	5	4	52.306	0.599	0	0	0	0	0	0	237	0	0	0	0	0	0	0
GCALDD_b1415	49	0.409424	1.61504	0	102	135	124	119	0.614583	0.408333	0.50625	1440	480	59	3	22	39	17	42	5	36	22	33	15	20	21	20	25	20	19	40	7	14	48.733	0.615	2	2	2	2	2	2	479	336	9	0.424022	0.000798	0.00359666	0.00359666	91
G3PEabcpp_b3452	98	0.320767	0.936113	5	27	50	100	119	0.537162	0.398649	0.739865	888	296	29	0	9	6	33	15	3	19	5	35	4	6	14	12	12	25	15	31	7	15	42.306	0.638	1	0	0	0	0	0	295	1	10	0.187452	0	2.13e-05	2.13e-05	198
AACPS6_b2836	53	0.183582	0.630585	1	136	179	211	194	0.611111	0.405556	0.5625	2160	720	55	4	30	45	36	55	16	39	38	78	23	13	41	27	51	33	44	61	8	22	47.712	0.603	0	0	0	0	0	0	719	0	0	0	0	0	0	11
FALDtex_b1377	49	0.0274733	0.683685	1	68	140	60	110	0.550265	0.399471	0.449735	1134	378	42	0	37	12	19	43	5	9	17	27	9	33	5	14	11	21	24	17	5	27	40.354	0.74	3	3	3	3	3	3	377	0	0	0	0	0	0	0
4PEPTtex_b1377	49	0.0274733	0.683685	1	68	140	60	110	0.550265	0.399471	0.449735	1134	378	42	0	37	12	19	43	5	9	17	27	9	33	5	14	11	21	24	17	5	27	40.354	0.74	3	3	3	3	3	3	377	37	11	0.325798	0.00130784	0.000406	0.000406	306
DHAtex_b1377	49	0.0274733	0.683685	1	68	140	60	110	0.550265	0.399471	0.449735	1134	378	42	0	37	12	19	43	5	9	17	27	9	33	5	14	11	21	24	17	5	27	40.354	0.74	3	3	3	3	3	3	377	3	11	0.314667	0	4.27e-05	4.27e-05	261
SUCDi_b0723	358	0.749455	1.35039	2	81	154	174	180	0.648557	0.439728	0.601019	1767	589	56	11	32	43	19	59	19	25	22	51	17	25	24	21	40	29	33	41	7	14	36.718	0.759	1	1	1	1	1	1	588	1	10	0.295894	0	2.13e-05	2.13e-05	302
DURADx_b2147	72	0.0620685	0.718727	1	65	109	132	106	0.548544	0.40534	0.57767	1236	412	30	18	20	31	15	39	9	28	24	32	16	17	19	14	15	23	19	26	4	12	46.067	0.625	1	0	0	0	0	0	411	0	0	0	0	0	0	0
NNDMBRT_b1991	219	0.304491	0.813815	1	77	115	100	68	0.625	0.447222	0.466667	1080	360	49	6	15	18	3	38	6	27	12	41	14	18	20	10	12	18	17	29	1	5	52.421	0.507	0	0	0	0	0	0	359	0	0	0	0	0	0	0
FACOAL60t2pp_b1701	35	0.233017	0.883692	1	125	158	141	125	0.582878	0.420765	0.484517	1647	549	53	15	30	33	20	35	13	28	27	63	13	13	27	23	30	31	32	38	8	16	48.624	0.556	0	0	0	0	0	0	548	1	13	0.193615	0	2.13e-05	2.13e-05	261
SULFACabcpp_b0933	108	0.0580024	0.660756	0	60	55	102	39	0.6875	0.429688	0.550781	768	256	28	0	13	17	3	24	5	9	7	44	6	7	10	13	22	9	13	20	4	1	47.098	0.503	19	19	19	19	17	12	255	0	0	0	0	0	0	0
METtex_b0241	57	0.045701	0.726706	0	70	118	72	92	0.502841	0.372159	0.465909	1056	352	31	0	31	14	21	37	1	14	25	23	9	27	3	17	12	21	24	16	3	22	46.295	0.669	3	3	3	3	3	3	351	0	0	0	0	0	0	0
S2FE2SS_b1683	455	0.107933	1.12275	2	84	118	139	155	0.53629	0.417339	0.592742	1488	496	46	13	22	42	22	36	12	28	24	31	9	27	16	18	19	38	32	33	7	20	46.537	0.639	0	0	0	0	0	0	495	272	9	0.398115	0.000782	0.00291362	0.00291362	91
3HPPtex_b0241	57	0.045701	0.726706	0	70	118	72	92	0.502841	0.372159	0.465909	1056	352	31	0	31	14	21	37	1	14	25	23	9	27	3	17	12	21	24	16	3	22	46.295	0.669	3	3	3	3	3	3	351	16	11	0.316865	3.5e-05	0.000181	0.000181	261
SPMDtex_b0929	44	1.53858	2.15677	0	56	129	52	126	0.556474	0.385675	0.490358	1089	363	34	0	27	14	19	49	1	14	19	23	5	32	5	13	12	16	22	26	2	29	37.082	0.832	3	3	3	3	3	3	362	12	11	0.316292	0.000832	0.000139	0.000139	306
IPPMIb_b0072	462	0.857005	1.29115	5	89	95	119	164	0.620985	0.445396	0.605996	1401	467	55	9	23	32	16	47	14	26	25	30	15	17	23	17	21	17	33	35	3	8	38.143	0.737	0	0	0	0	0	0	466	164	10	0.374618	0.000251	0.00176098	0.00176098	91
UACGAMtex_b2215	64	0.0280042	1.90111	9	51	107	58	152	0.570652	0.377717	0.570652	1104	368	29	0	32	11	19	48	1	10	17	27	4	32	4	21	13	17	24	25	4	29	29.032	0.898	3	3	3	3	3	3	367	0	0	0	0	0	0	0
26DAHtex_b2215	64	0.0280042	1.90111	9	51	107	58	152	0.570652	0.377717	0.570652	1104	368	29	0	32	11	19	48	1	10	17	27	4	32	4	21	13	17	24	25	4	29	29.032	0.898	3	3	3	3	3	3	367	0	0	0	0	0	0	0
VALabcpp_b3454	391	0.832839	1.03879	3	27	48	95	68	0.634454	0.382353	0.684874	714	238	21	1	12	18	9	22	5	17	8	27	9	8	6	14	17	10	12	15	2	4	43.799	0.608	0	0	0	0	0	0	237	1	13	0.19337	0	2.13e-05	2.13e-05	261
ASPtex_b0241	57	0.045701	0.726706	0	70	118	72	92	0.502841	0.372159	0.465909	1056	352	31	0	31	14	21	37	1	14	25	23	9	27	3	17	12	21	24	16	3	22	46.295	0.669	3	3	3	3	3	3	351	2	11	0.314587	0	3.2e-05	3.2e-05	261
GLCptspp_b1819	121	0.238118	1.04384	3	46	73	75	90	0.59507	0.40493	0.580986	852	284	22	3	9	10	18	32	3	20	11	37	9	11	12	11	14	9	18	23	5	6	42.213	0.734	0	0	0	0	0	0	283	2	10	0.311546	1.05e-06	3.2e-05	3.2e-05	302
GLUCYS_b2688	169	0.345878	1.02167	0	97	144	153	125	0.579961	0.423892	0.535645	1557	519	44	9	27	43	22	40	7	31	23	54	12	18	25	20	34	30	29	21	8	21	46.221	0.655	0	0	0	0	0	0	518	29	10	0.3095	2.95e-05	0.00032	0.00032	306
THRtex_b0241	57	0.045701	0.726706	0	70	118	72	92	0.502841	0.372159	0.465909	1056	352	31	0	31	14	21	37	1	14	25	23	9	27	3	17	12	21	24	16	3	22	46.295	0.669	3	3	3	3	3	3	351	2	11	0.314587	0	3.2e-05	3.2e-05	261
PACALDtex_b0241	57	0.045701	0.726706	0	70	118	72	92	0.502841	0.372159	0.465909	1056	352	31	0	31	14	21	37	1	14	25	23	9	27	3	17	12	21	24	16	3	22	46.295	0.669	3	3	3	3	3	3	351	0	0	0	0	0	0	0
BUTt2rpp_b2223	89	0.0404526	0.938249	0	66	107	123	145	0.546485	0.437642	0.60771	1323	441	49	3	11	11	33	41	6	38	10	50	27	11	27	11	14	25	24	32	9	8	52.444	0.594	0	0	0	0	0	0	440	0	0	0	0	0	0	0
NTD10pp_b4055	74	0.14684	0.511661	0	47	74	53	64	0.542017	0.44958	0.491597	714	238	23	1	14	11	13	15	3	16	12	14	5	15	16	8	13	20	13	16	5	4	52.306	0.599	0	0	0	0	0	0	237	0	0	0	0	0	0	0
UM4PL_b4233	168	0.0497875	0.62198	0	62	118	165	113	0.648472	0.40393	0.606987	1374	458	49	8	27	28	16	45	19	27	20	43	15	16	20	20	18	15	20	34	10	7	40.706	0.713	0	0	0	0	0	0	457	14	11	0.255634	4.61e-07	0.00016	0.00016	306
TALA_b2464	63	0.00597117	1.3777	4	73	76	84	84	0.608833	0.369085	0.529968	951	317	31	4	18	27	11	16	7	20	22	31	5	9	14	17	18	17	13	22	4	10	49.805	0.619	1	1	1	1	1	1	316	0	0	0	0	0	0	311
NO3R2pp_b1227	84	0.190742	0.826859	0	19	45	94	68	0.575221	0.384956	0.716814	678	226	17	2	6	4	18	21	9	15	6	33	12	3	7	9	12	13	9	15	6	8	40.602	0.728	1	1	1	1	1	1	225	0	0	0	0	0	0	0
ASCBptspp_b2415	225	0.0245069	1.24341	4	18	22	22	24	0.593023	0.395349	0.534884	258	86	9	0	1	9	4	6	2	3	7	8	2	2	2	6	1	6	10	7	0	0	38.988	0.805	1	1	1	0	0	0	85	0	0	0	0	0	0	0
GLYC2Pabcpp_b3452	98	0.320767	0.936113	5	27	50	100	119	0.537162	0.398649	0.739865	888	296	29	0	9	6	33	15	3	19	5	35	4	6	14	12	12	25	15	31	7	15	42.306	0.638	1	0	0	0	0	0	295	0	0	0	0	0	0	0
BUTtex_b0929	44	1.53858	2.15677	0	56	129	52	126	0.556474	0.385675	0.490358	1089	363	34	0	27	14	19	49	1	14	19	23	5	32	5	13	12	16	22	26	2	29	37.082	0.832	3	3	3	3	3	3	362	3	11	0.31491	0.000829	4.27e-05	4.27e-05	261
TMAOR2_b0895	81	0.00534415	0.673661	1	29	64	50	63	0.548544	0.456311	0.548544	618	206	15	16	15	12	7	16	7	8	14	9	4	8	14	4	10	8	12	13	2	11	43.02	0.725	4	4	4	4	4	1	205	0	0	0	0	0	0	0
DPR_b3774	411	1.16933	2.27773	12	84	106	159	143	0.617886	0.382114	0.613821	1476	492	50	6	26	42	16	46	7	28	33	45	21	16	17	21	21	21	22	31	5	17	36.66	0.791	0	0	0	0	0	0	491	5	11	0.246677	0	6.4e-05	6.4e-05	241
MDDCP3pp_b0839	177	0.0272172	0.857459	0	65	107	133	96	0.558603	0.421446	0.571072	1203	401	40	1	21	19	23	37	4	17	26	38	12	17	14	17	15	25	29	29	8	8	42.884	0.652	2	2	2	2	2	2	400	11	10	0.31491	3.34e-07	0.000128	0.000128	306
DADNt2pp_b2964	18	0.0429157	0.914842	0	52	100	131	136	0.470167	0.384248	0.637232	1257	419	37	4	10	7	38	30	7	40	14	47	24	12	13	15	7	32	28	30	10	13	43.146	0.717	1	1	1	1	1	1	418	0	0	0	0	0	0	0
DGSNtex_b0929	44	1.53858	2.15677	0	56	129	52	126	0.556474	0.385675	0.490358	1089	363	34	0	27	14	19	49	1	14	19	23	5	32	5	13	12	16	22	26	2	29	37.082	0.832	3	3	3	3	3	3	362	0	0	0	0	0	0	0
GLCTR1_b3631	29	0.227247	0.677932	0	100	135	78	62	0.581333	0.389333	0.373333	1125	375	40	5	18	25	18	24	13	16	20	35	7	13	17	21	23	17	16	24	3	19	49.968	0.523	0	0	0	0	0	0	374	84	10	0.320597	0.000154	0.000907	0.000907	306
FUSAtex_b2215	64	0.0280042	1.90111	9	51	107	58	152	0.570652	0.377717	0.570652	1104	368	29	0	32	11	19	48	1	10	17	27	4	32	4	21	13	17	24	25	4	29	29.032	0.898	3	3	3	3	3	3	367	1	1	1	0	2.13e-05	2.13e-05	125
MDDEP3pp_b2134	92	0.243299	0.987889	3	57	80	104	70	0.530547	0.430868	0.559486	933	311	41	1	12	8	10	12	7	13	21	31	15	18	16	10	15	23	24	22	2	9	41.618	0.65	0	0	0	0	0	0	310	15	11	0.255688	1.79e-06	0.000171	0.000171	306
GALTtex_b0241	57	0.045701	0.726706	0	70	118	72	92	0.502841	0.372159	0.465909	1056	352	31	0	31	14	21	37	1	14	25	23	9	27	3	17	12	21	24	16	3	22	46.295	0.669	3	3	3	3	3	3	351	0	0	0	0	0	0	0
HXAND_b2866	60	0.140289	0.828865	0	150	204	177	222	0.613546	0.446215	0.52988	2259	753	86	11	39	41	19	60	22	46	27	61	22	27	40	29	39	44	47	62	8	22	50.487	0.595	0	0	0	0	0	0	752	0	0	0	0	0	0	179
CA2t3pp_b1216	86	11.7	120.427	6	65	108	108	86	0.547684	0.386921	0.52861	1101	367	44	1	10	10	20	22	12	27	8	61	14	12	13	10	7	30	21	34	3	7	50.381	0.536	0	0	0	0	0	0	366	1	11	0.245737	0	2.13e-05	2.13e-05	91
NO3R1bpp_b2202	107	0.0179102	0.585781	0	24	52	69	56	0.532338	0.393035	0.621891	603	201	11	8	10	13	9	15	9	9	16	11	10	11	8	7	13	8	11	11	5	5	48.325	0.671	2	2	2	2	2	2	200	0	0	0	0	0	0	0
3NTD4pp_b4213	95	0.0121502	0.840414	0	112	183	179	174	0.567901	0.371914	0.544753	1944	648	73	2	54	27	22	45	11	36	50	47	16	41	31	21	18	32	33	52	7	29	44.263	0.649	0	0	0	0	0	0	647	0	0	0	0	0	0	0
AGM4PA_b0110	228	0.19693	0.795025	0	27	62	53	42	0.63587	0.461957	0.516304	552	184	17	5	16	9	8	13	7	11	4	14	2	3	14	8	13	6	12	11	4	6	53.313	0.594	0	0	0	0	0	0	183	2	3	0.5	4.3e-06	3.2e-05	3.2e-05	32
SBTptspp_b2702	78	0.229072	0.903299	1	29	54	49	56	0.537234	0.409574	0.558511	564	188	12	4	1	8	13	19	5	14	6	26	7	8	10	5	6	10	13	11	2	7	46.358	0.615	0	0	0	0	0	0	187	0	0	0	0	0	0	0
SSALy_b1525	207	0.427615	0.861377	0	93	138	142	90	0.637149	0.453564	0.50108	1389	463	74	7	22	32	17	41	8	28	19	38	15	19	19	19	25	14	22	27	7	9	45.802	0.63	0	0	0	0	0	0	462	2	10	0.296037	0	3.2e-05	3.2e-05	302
FRULYStex_b0929	44	1.53858	2.15677	0	56	129	52	126	0.556474	0.385675	0.490358	1089	363	34	0	27	14	19	49	1	14	19	23	5	32	5	13	12	16	22	26	2	29	37.082	0.832	3	3	3	3	3	3	362	0	0	0	0	0	0	0
NO3t7pp_b1469	33	0.0164334	0.872752	0	79	144	113	127	0.516199	0.434125	0.518359	1389	463	51	5	8	6	45	46	3	37	15	54	15	21	19	14	16	33	20	36	11	7	52.508	0.541	1	1	1	1	1	1	462	0	0	0	0	0	0	0
MG2uabcpp_b4242	121	0.144256	1.34126	0	149	216	329	205	0.583982	0.395996	0.593993	2697	899	83	10	45	51	36	52	20	61	35	108	29	30	43	40	43	51	57	73	17	14	43.739	0.616	0	0	0	0	0	0	898	0	0	0	0	0	0	207
MANPGH_b0732	54	0.0918616	0.818012	2	173	237	237	231	0.569476	0.378132	0.53303	2634	878	58	12	56	66	32	53	19	54	41	82	29	42	42	37	58	51	41	58	16	30	52.792	0.578	0	0	0	0	0	0	877	0	0	0	0	0	0	0
MALTtexi_b4036	60	0.669972	1.19331	0	59	121	97	170	0.530201	0.422819	0.597315	1341	447	40	2	33	21	20	49	6	20	20	22	16	31	9	22	17	28	25	24	19	22	41.864	0.773	0	0	0	0	0	0	446	0	0	0	0	0	0	0
TYRPpp_b4055	74	0.14684	0.511661	0	47	74	53	64	0.542017	0.44958	0.491597	714	238	23	1	14	11	13	15	3	16	12	14	5	15	16	8	13	20	13	16	5	4	52.306	0.599	0	0	0	0	0	0	237	0	0	0	0	0	0	0
ARBTNabcpp_b0151	118	0.20204	0.686129	0	31	78	97	60	0.661654	0.454887	0.590226	798	266	27	2	10	16	6	24	10	14	7	35	9	4	17	10	18	17	12	17	3	7	40.624	0.625	2	2	2	2	2	2	265	8	11	0.315072	3.39e-07	9.61e-05	9.61e-05	261
CGLYabcpp_b3543	261	0.41012	0.943299	1	34	70	125	111	0.605882	0.394118	0.694118	1020	340	25	1	14	10	13	31	9	32	6	45	20	6	17	8	20	12	19	36	9	6	44.936	0.623	3	3	3	3	3	3	339	2	13	0.194198	0	3.2e-05	3.2e-05	261
NTPP1_b0099	151	0.161707	0.5753	0	32	34	45	19	0.630769	0.353846	0.492308	390	130	9	0	4	18	7	10	3	9	8	11	4	6	9	5	7	2	4	7	5	1	43.556	0.572	0	0	0	0	0	0	129	0	0	0	0	0	0	254
GLCNtex_b1377	49	0.0274733	0.683685	1	68	140	60	110	0.550265	0.399471	0.449735	1134	378	42	0	37	12	19	43	5	9	17	27	9	33	5	14	11	21	24	17	5	27	40.354	0.74	3	3	3	3	3	3	377	6	11	0.315234	0.000578	7.47e-05	7.47e-05	261
NTD1_b2744	420	0.227363	0.722778	0	37	82	73	62	0.637795	0.472441	0.531496	762	254	24	5	21	6	5	25	7	14	5	23	4	11	17	9	15	14	17	23	3	5	42.933	0.589	0	0	0	0	0	0	253	0	0	0	0	0	0	243
PPAt4pp_b1015	159	0.181786	0.797271	0	58	126	191	128	0.536779	0.439364	0.634195	1509	503	62	5	12	15	33	47	9	47	12	59	18	14	14	10	19	38	21	39	15	13	40.835	0.645	0	0	0	0	0	0	502	0	0	0	0	0	0	0
ALCD2x_b1241	167	0.422618	1.85799	2	167	275	199	251	0.600897	0.413677	0.504484	2676	892	121	9	50	54	31	62	20	60	65	72	21	34	41	24	32	50	49	63	5	28	34.816	0.816	0	0	0	0	0	0	891	4	11	0.314748	0	5.34e-05	5.34e-05	261
S2FE2SR_b1680	489	0.176131	1.03524	0	47	111	136	113	0.626536	0.407862	0.611794	1221	407	43	4	15	25	11	34	18	21	10	45	13	21	18	14	19	21	22	32	5	15	47.218	0.595	1	1	1	1	1	1	406	359	9	0.420096	0.0336325	0.00384213	0.00384213	302
NTRIR2x_b3365	192	0.641055	1.52891	1	134	198	204	312	0.60967	0.410377	0.608491	2544	848	69	21	48	65	26	80	22	57	48	78	18	33	32	23	48	44	45	57	8	25	38.149	0.772	0	0	0	0	0	0	847	0	0	0	0	0	0	0
NTPP6_b2781	458	0.271171	0.613909	0	54	74	75	61	0.662879	0.344697	0.515152	792	264	27	3	21	32	11	10	4	13	12	24	8	7	7	17	21	7	12	18	4	5	43.609	0.653	0	0	0	0	0	0	263	0	0	0	0	0	0	258
NADH10_b1109	98	0.318241	1.08243	0	72	105	137	121	0.6	0.395402	0.593103	1305	435	39	4	18	23	11	42	17	26	25	52	14	23	17	14	22	20	26	27	2	12	42.461	0.672	0	0	0	0	0	0	434	0	0	0	0	0	0	223
MDDEP2pp_b3182	70	0.0407299	0.377247	0	76	130	134	138	0.587866	0.437238	0.569038	1434	478	54	5	27	11	19	37	7	28	18	44	14	21	24	31	26	32	27	33	4	15	52.627	0.56	0	0	0	0	0	0	477	15	11	0.255688	5.82e-07	0.000171	0.000171	306
G3PStex_b2215	64	0.0280042	1.90111	9	51	107	58	152	0.570652	0.377717	0.570652	1104	368	29	0	32	11	19	48	1	10	17	27	4	32	4	21	13	17	24	25	4	29	29.032	0.898	3	3	3	3	3	3	367	0	0	0	0	0	0	0
FACOAE60_b0452	204	0.111435	0.81707	0	49	82	83	73	0.637631	0.393728	0.543554	861	287	22	1	12	19	16	21	12	12	10	31	5	11	20	16	16	20	10	21	3	8	48.274	0.628	0	0	0	0	0	0	286	2	13	0.193676	0.000831	3.2e-05	3.2e-05	261
MLTP3_b3417	83	0.193274	0.975522	0	120	200	274	204	0.615288	0.354637	0.598997	2394	798	80	7	53	44	31	49	24	43	54	82	14	42	30	47	41	25	31	54	20	26	42.166	0.715	1	1	1	1	1	1	797	1	1	1	0	2.13e-05	2.13e-05	217
FRUURtex_b2215	64	0.0280042	1.90111	9	51	107	58	152	0.570652	0.377717	0.570652	1104	368	29	0	32	11	19	48	1	10	17	27	4	32	4	21	13	17	24	25	4	29	29.032	0.898	3	3	3	3	3	3	367	0	0	0	0	0	0	0
LPLIPAL2A160_b3825	63	0.201587	0.617796	0	60	99	89	93	0.648094	0.431085	0.533724	1023	341	33	3	23	18	21	26	16	18	5	26	8	10	17	14	36	11	14	24	7	10	54.742	0.58	0	0	0	0	0	0	340	3	10	0.179962	0	4.27e-05	4.27e-05	198
26DAHtex_b0241	57	0.045701	0.726706	0	70	118	72	92	0.502841	0.372159	0.465909	1056	352	31	0	31	14	21	37	1	14	25	23	9	27	3	17	12	21	24	16	3	22	46.295	0.669	3	3	3	3	3	3	351	0	0	0	0	0	0	0
TYRPtex_b2215	64	0.0280042	1.90111	9	51	107	58	152	0.570652	0.377717	0.570652	1104	368	29	0	32	11	19	48	1	10	17	27	4	32	4	21	13	17	24	25	4	29	29.032	0.898	3	3	3	3	3	3	367	0	0	0	0	0	0	0
CDAPPA180_b3918	68	0.177121	0.562483	0	51	79	77	45	0.575397	0.400794	0.484127	756	252	18	4	9	16	7	14	6	12	9	31	8	15	16	14	19	15	11	16	4	7	47.779	0.536	0	0	0	0	0	0	251	1	12	0.119256	0	2.13e-05	2.13e-05	198
FE3HOXabcpp_b0151	118	0.20204	0.686129	0	31	78	97	60	0.661654	0.454887	0.590226	798	266	27	2	10	16	6	24	10	14	7	35	9	4	17	10	18	17	12	17	3	7	40.624	0.625	2	2	2	2	2	2	265	8	11	0.315072	3.39e-07	9.61e-05	9.61e-05	261
34dhpactex_b1377	49	0.0274733	0.683685	1	68	140	60	110	0.550265	0.399471	0.449735	1134	378	42	0	37	12	19	43	5	9	17	27	9	33	5	14	11	21	24	17	5	27	40.354	0.74	3	3	3	3	3	3	377	0	0	0	0	0	0	0
FMNRx_b3844	56	0.109404	0.751612	0	35	69	75	55	0.615385	0.41453	0.555556	702	234	23	3	17	18	10	16	7	17	7	21	7	4	9	6	19	10	13	16	3	7	48.522	0.614	0	0	0	0	0	0	233	1	11	0.314506	0	2.13e-05	2.13e-05	261
3GMPtex_b1377	49	0.0274733	0.683685	1	68	140	60	110	0.550265	0.399471	0.449735	1134	378	42	0	37	12	19	43	5	9	17	27	9	33	5	14	11	21	24	17	5	27	40.354	0.74	3	3	3	3	3	3	377	0	0	0	0	0	0	0
PLIPA2E160pp_b3821	101	0.0282509	0.656571	0	38	73	92	87	0.524138	0.396552	0.617241	870	290	18	0	16	15	10	23	5	9	10	29	8	20	13	12	13	19	18	18	10	23	46.721	0.641	0	0	0	0	0	0	289	6	9	0.261361	0.00310546	7.47e-05	7.47e-05	198
TARTRtex_b0241	57	0.045701	0.726706	0	70	118	72	92	0.502841	0.372159	0.465909	1056	352	31	0	31	14	21	37	1	14	25	23	9	27	3	17	12	21	24	16	3	22	46.295	0.669	3	3	3	3	3	3	351	0	0	0	0	0	0	0
UDPGLCURtex_b0241	57	0.045701	0.726706	0	70	118	72	92	0.502841	0.372159	0.465909	1056	352	31	0	31	14	21	37	1	14	25	23	9	27	3	17	12	21	24	16	3	22	46.295	0.669	3	3	3	3	3	3	351	0	0	0	0	0	0	0
CHLabcpp_b2129	225	0.111945	0.785904	0	55	77	113	64	0.68932	0.391586	0.572816	927	309	24	2	16	23	12	24	9	13	5	43	10	9	11	19	28	18	12	25	2	3	44.612	0.574	10	10	10	10	10	9	308	0	0	0	0	0	0	0
LPLIPAL2ATE160_b3825	63	0.201587	0.617796	0	60	99	89	93	0.648094	0.431085	0.533724	1023	341	33	3	23	18	21	26	16	18	5	26	8	10	17	14	36	11	14	24	7	10	54.742	0.58	0	0	0	0	0	0	340	0	0	0	0	0	0	0
GRXR_b3610	285	0.171768	0.710785	0	14	22	21	27	0.583333	0.416667	0.571429	252	84	8	3	6	5	2	7	2	6	6	8	2	2	4	3	5	4	4	3	0	3	38.071	0.722	1	1	1	0	0	0	83	6	12	0.241047	0.00111783	7.47e-05	7.47e-05	261
2AGPA180tipp_b2835	60	0.122308	0.614945	0	50	93	149	106	0.580402	0.444724	0.640704	1194	398	57	4	4	9	20	43	4	26	12	57	14	16	14	10	10	22	18	38	9	10	50.482	0.583	0	0	0	0	0	0	397	3	9	0.214649	0	4.27e-05	4.27e-05	198
UDPACGALtex_b2215	64	0.0280042	1.90111	9	51	107	58	152	0.570652	0.377717	0.570652	1104	368	29	0	32	11	19	48	1	10	17	27	4	32	4	21	13	17	24	25	4	29	29.032	0.898	3	3	3	3	3	3	367	0	0	0	0	0	0	0
GALURtex_b0241	57	0.045701	0.726706	0	70	118	72	92	0.502841	0.372159	0.465909	1056	352	31	0	31	14	21	37	1	14	25	23	9	27	3	17	12	21	24	16	3	22	46.295	0.669	3	3	3	3	3	3	351	0	0	0	0	0	0	0
3UMPtex_b2215	64	0.0280042	1.90111	9	51	107	58	152	0.570652	0.377717	0.570652	1104	368	29	0	32	11	19	48	1	10	17	27	4	32	4	21	13	17	24	25	4	29	29.032	0.898	3	3	3	3	3	3	367	0	0	0	0	0	0	0
PFL_b0902	146	0.172796	1.02244	0	41	64	56	86	0.595142	0.340081	0.574899	741	247	9	6	17	20	11	23	11	11	17	19	10	9	6	5	14	8	13	24	5	8	42.317	0.729	0	0	0	0	0	0	246	0	0	0	0	0	0	271
UREAtex_b0241	57	0.045701	0.726706	0	70	118	72	92	0.502841	0.372159	0.465909	1056	352	31	0	31	14	21	37	1	14	25	23	9	27	3	17	12	21	24	16	3	22	46.295	0.669	3	3	3	3	3	3	351	3	1	1	0	4.27e-05	4.27e-05	2
MPTSS_b0826	450	8.16733	81.7839	6	43	56	81	70	0.636	0.416	0.604	750	250	29	9	15	13	7	22	3	13	7	30	10	10	8	13	13	12	11	18	0	6	46.059	0.636	1	1	1	1	1	1	249	336	9	0.424022	0.000798	0.00359666	0.00359666	91
NTP10_b4394	97	0.355202	1.0235	0	22	53	49	47	0.649123	0.473684	0.561404	513	171	24	2	4	15	7	15	5	12	4	10	2	5	8	6	11	11	8	16	2	3	50.434	0.611	0	0	0	0	0	0	170	1	1	1	0	2.13e-05	2.13e-05	27
SUCCtex_b0241	57	0.045701	0.726706	0	70	118	72	92	0.502841	0.372159	0.465909	1056	352	31	0	31	14	21	37	1	14	25	23	9	27	3	17	12	21	24	16	3	22	46.295	0.669	3	3	3	3	3	3	351	2	11	0.314587	0	3.2e-05	3.2e-05	261
ACGAptspp_b1101	110	0.505888	1.09428	0	66	137	126	149	0.579498	0.424686	0.575314	1434	478	61	3	14	15	32	50	10	44	21	44	15	16	23	9	12	28	20	40	6	14	40.018	0.775	4	2	2	2	2	2	477	0	0	0	0	0	0	0
ATPS4rpp_b3734	574	0.0256247	1.74167	9	87	148	116	163	0.643969	0.414397	0.542802	1542	514	58	4	28	31	14	48	7	40	24	46	10	16	18	28	29	32	23	40	1	16	32.42	0.82	0	0	0	0	0	0	513	0	0	0	0	0	0	60
PAPA141_b1278	82	0.0324914	0.618938	0	72	65	75	43	0.588235	0.466667	0.462745	765	255	29	2	3	15	11	15	6	16	10	32	5	3	13	11	18	10	15	21	17	2	55.788	0.485	0	0	0	0	0	0	254	1	2	0.6	0	2.13e-05	2.13e-05	5
CHLtex_b0929	44	1.53858	2.15677	0	56	129	52	126	0.556474	0.385675	0.490358	1089	363	34	0	27	14	19	49	1	14	19	23	5	32	5	13	12	16	22	26	2	29	37.082	0.832	3	3	3	3	3	3	362	0	0	0	0	0	0	0
3UMPtex_b0241	57	0.045701	0.726706	0	70	118	72	92	0.502841	0.372159	0.465909	1056	352	31	0	31	14	21	37	1	14	25	23	9	27	3	17	12	21	24	16	3	22	46.295	0.669	3	3	3	3	3	3	351	0	0	0	0	0	0	0
H2tex_b0929	44	1.53858	2.15677	0	56	129	52	126	0.556474	0.385675	0.490358	1089	363	34	0	27	14	19	49	1	14	19	23	5	32	5	13	12	16	22	26	2	29	37.082	0.832	3	3	3	3	3	3	362	4	11	0.316292	0.00274462	5.34e-05	5.34e-05	261
ILEtex_b0241	57	0.045701	0.726706	0	70	118	72	92	0.502841	0.372159	0.465909	1056	352	31	0	31	14	21	37	1	14	25	23	9	27	3	17	12	21	24	16	3	22	46.295	0.669	3	3	3	3	3	3	351	17	11	0.317358	0.000844	0.000192	0.000192	261
ZN2abcpp_b3469	302	0.316471	1.06124	0	130	151	250	202	0.656207	0.474761	0.616644	2199	733	119	9	28	47	18	59	9	45	25	91	13	21	30	26	41	35	49	55	6	6	46.137	0.614	0	0	0	0	0	0	732	0	0	0	0	0	0	333
MOBDtex_b0929	44	1.53858	2.15677	0	56	129	52	126	0.556474	0.385675	0.490358	1089	363	34	0	27	14	19	49	1	14	19	23	5	32	5	13	12	16	22	26	2	29	37.082	0.832	3	3	3	3	3	3	362	336	9	0.424022	0.000798	0.00359666	0.00359666	91
TGBPA_b2095	56	0.190327	2.67181	8	94	128	107	92	0.593824	0.401425	0.472684	1263	421	46	8	19	34	15	23	14	33	14	32	10	12	18	21	25	23	21	30	5	17	46.996	0.595	1	1	1	1	1	1	420	0	0	0	0	0	0	0
RNDR2_b3781	625	0.0391972	0.941381	0	20	26	31	33	0.581818	0.363636	0.581818	330	110	12	2	11	5	4	9	1	9	10	13	2	4	5	3	1	3	6	5	2	2	38.428	0.781	1	1	1	1	1	0	109	1	11	0.239539	0	2.13e-05	2.13e-05	261
THMtex_b0929	44	1.53858	2.15677	0	56	129	52	126	0.556474	0.385675	0.490358	1089	363	34	0	27	14	19	49	1	14	19	23	5	32	5	13	12	16	22	26	2	29	37.082	0.832	3	3	3	3	3	3	362	0	0	0	0	0	0	0
XMPtex_b1377	49	0.0274733	0.683685	1	68	140	60	110	0.550265	0.399471	0.449735	1134	378	42	0	37	12	19	43	5	9	17	27	9	33	5	14	11	21	24	17	5	27	40.354	0.74	3	3	3	3	3	3	377	0	0	0	0	0	0	0
SO3tex_b2215	64	0.0280042	1.90111	9	51	107	58	152	0.570652	0.377717	0.570652	1104	368	29	0	32	11	19	48	1	10	17	27	4	32	4	21	13	17	24	25	4	29	29.032	0.898	3	3	3	3	3	3	367	0	0	0	0	0	0	0
UDPGtex_b2215	64	0.0280042	1.90111	9	51	107	58	152	0.570652	0.377717	0.570652	1104	368	29	0	32	11	19	48	1	10	17	27	4	32	4	21	13	17	24	25	4	29	29.032	0.898	3	3	3	3	3	3	367	0	0	0	0	0	0	0
GLCUR1Ptex_b0929	44	1.53858	2.15677	0	56	129	52	126	0.556474	0.385675	0.490358	1089	363	34	0	27	14	19	49	1	14	19	23	5	32	5	13	12	16	22	26	2	29	37.082	0.832	3	3	3	3	3	3	362	0	0	0	0	0	0	0
ALLtex_b2215	64	0.0280042	1.90111	9	51	107	58	152	0.570652	0.377717	0.570652	1104	368	29	0	32	11	19	48	1	10	17	27	4	32	4	21	13	17	24	25	4	29	29.032	0.898	3	3	3	3	3	3	367	0	0	0	0	0	0	0
4HOXPACDtex_b0929	44	1.53858	2.15677	0	56	129	52	126	0.556474	0.385675	0.490358	1089	363	34	0	27	14	19	49	1	14	19	23	5	32	5	13	12	16	22	26	2	29	37.082	0.832	3	3	3	3	3	3	362	0	0	0	0	0	0	0
S2FE2SS2_b1683	455	0.107933	1.12275	2	84	118	139	155	0.53629	0.417339	0.592742	1488	496	46	13	22	42	22	36	12	28	24	31	9	27	16	18	19	38	32	33	7	20	46.537	0.639	0	0	0	0	0	0	495	272	9	0.398115	0.000782	0.00291362	0.00291362	91
GGPTRCS_b1297	58	0.483673	1.21859	1	69	121	153	130	0.646934	0.359408	0.598309	1419	473	38	8	29	43	18	32	14	17	13	53	17	27	26	23	29	19	15	33	3	15	47.058	0.625	0	0	0	0	0	0	472	3	1	1	0	4.27e-05	4.27e-05	137
AM4PA_b0110	228	0.19693	0.795025	0	27	62	53	42	0.63587	0.461957	0.516304	552	184	17	5	16	9	8	13	7	11	4	14	2	3	14	8	13	6	12	11	4	6	53.313	0.594	0	0	0	0	0	0	183	6	3	0.583333	3.32e-06	7.47e-05	7.47e-05	32
ORNtex_b0929	44	1.53858	2.15677	0	56	129	52	126	0.556474	0.385675	0.490358	1089	363	34	0	27	14	19	49	1	14	19	23	5	32	5	13	12	16	22	26	2	29	37.082	0.832	3	3	3	3	3	3	362	3	11	0.315234	0.000896	4.27e-05	4.27e-05	261
AKGtex_b2215	64	0.0280042	1.90111	9	51	107	58	152	0.570652	0.377717	0.570652	1104	368	29	0	32	11	19	48	1	10	17	27	4	32	4	21	13	17	24	25	4	29	29.032	0.898	3	3	3	3	3	3	367	3	11	0.314667	0	4.27e-05	4.27e-05	261
LPLIPAL2ATE141_b3825	63	0.201587	0.617796	0	60	99	89	93	0.648094	0.431085	0.533724	1023	341	33	3	23	18	21	26	16	18	5	26	8	10	17	14	36	11	14	24	7	10	54.742	0.58	0	0	0	0	0	0	340	0	0	0	0	0	0	0
DOGULNR_b3575	64	0.129263	0.571648	0	49	87	74	123	0.567568	0.432432	0.591592	999	333	32	3	22	20	9	29	4	29	13	23	15	15	13	13	21	20	18	19	7	7	47.202	0.66	0	0	0	0	0	0	332	0	0	0	0	0	0	0
UACMAMO_b3787	140	0.0165646	0.756874	0	65	114	132	110	0.631829	0.406176	0.574822	1263	421	47	9	23	28	13	25	10	30	18	35	9	17	23	19	19	19	21	43	7	5	47.597	0.646	0	0	0	0	0	0	420	45	11	0.325452	0.000102	0.000491	0.000491	306
GLCP2_b3417	83	0.193274	0.975522	0	120	200	274	204	0.615288	0.354637	0.598997	2394	798	80	7	53	44	31	49	24	43	54	82	14	42	30	47	41	25	31	54	20	26	42.166	0.715	1	1	1	1	1	1	797	1	2	0.666667	0	2.13e-05	2.13e-05	140
34dhpactex_b0241	57	0.045701	0.726706	0	70	118	72	92	0.502841	0.372159	0.465909	1056	352	31	0	31	14	21	37	1	14	25	23	9	27	3	17	12	21	24	16	3	22	46.295	0.669	3	3	3	3	3	3	351	0	0	0	0	0	0	0
HYXNtex_b1377	49	0.0274733	0.683685	1	68	140	60	110	0.550265	0.399471	0.449735	1134	378	42	0	37	12	19	43	5	9	17	27	9	33	5	14	11	21	24	17	5	27	40.354	0.74	3	3	3	3	3	3	377	3	11	0.314667	0	4.27e-05	4.27e-05	261
LCTStex_b2215	64	0.0280042	1.90111	9	51	107	58	152	0.570652	0.377717	0.570652	1104	368	29	0	32	11	19	48	1	10	17	27	4	32	4	21	13	17	24	25	4	29	29.032	0.898	3	3	3	3	3	3	367	0	0	0	0	0	0	0
NH4tex_b0241	57	0.045701	0.726706	0	70	118	72	92	0.502841	0.372159	0.465909	1056	352	31	0	31	14	21	37	1	14	25	23	9	27	3	17	12	21	24	16	3	22	46.295	0.669	3	3	3	3	3	3	351	221	10	0.341416	0.00174683	0.00236931	0.00236931	261
GLYCL_b2903	464	0.0665864	1.36018	0	144	214	294	306	0.640919	0.411273	0.626305	2874	958	112	13	52	55	28	71	32	57	34	88	34	36	48	47	46	48	49	71	7	29	38.255	0.742	0	0	0	0	0	0	957	1	10	0.295894	0	2.13e-05	2.13e-05	302
G6Ptex_b0241	57	0.045701	0.726706	0	70	118	72	92	0.502841	0.372159	0.465909	1056	352	31	0	31	14	21	37	1	14	25	23	9	27	3	17	12	21	24	16	3	22	46.295	0.669	3	3	3	3	3	3	351	0	0	0	0	0	0	0
NTD7_b2744	420	0.227363	0.722778	0	37	82	73	62	0.637795	0.472441	0.531496	762	254	24	5	21	6	5	25	7	14	5	23	4	11	17	9	15	14	17	23	3	5	42.933	0.589	0	0	0	0	0	0	253	0	0	0	0	0	0	249
GLCRtex_b0929	44	1.53858	2.15677	0	56	129	52	126	0.556474	0.385675	0.490358	1089	363	34	0	27	14	19	49	1	14	19	23	5	32	5	13	12	16	22	26	2	29	37.082	0.832	3	3	3	3	3	3	362	0	0	0	0	0	0	0
AP5AH_b0049	224	0.15554	0.754554	0	47	63	97	74	0.629893	0.434164	0.608541	843	281	24	6	20	18	11	23	7	9	13	37	6	8	19	7	15	14	13	13	8	9	45.327	0.648	0	0	0	0	0	0	280	0	0	0	0	0	0	0
ARGORNt7pp_b1605	88	0.113085	0.96208	0	79	102	148	132	0.572668	0.425163	0.607375	1383	461	56	6	8	14	21	39	6	31	12	79	18	12	17	8	15	25	25	44	13	11	45.072	0.641	0	0	0	0	0	0	460	5	12	0.240432	0.00098	6.4e-05	6.4e-05	261
PTRCabcpp_b0857	115	0.184316	1.07364	0	38	66	109	69	0.542553	0.468085	0.631206	846	282	36	2	9	6	15	20	2	23	3	39	14	6	12	2	18	18	17	26	8	5	46.919	0.519	2	2	1	1	1	1	281	3	13	0.1955	9.35e-06	4.27e-05	4.27e-05	261
PYRtex_b2215	64	0.0280042	1.90111	9	51	107	58	152	0.570652	0.377717	0.570652	1104	368	29	0	32	11	19	48	1	10	17	27	4	32	4	21	13	17	24	25	4	29	29.032	0.898	3	3	3	3	3	3	367	4	10	0.353637	0	5.34e-05	5.34e-05	261
FHL_b2486	86	0.104237	0.63339	0	69	122	182	154	0.567362	0.411765	0.637571	1581	527	55	8	11	13	30	43	14	37	10	98	21	12	20	9	18	35	30	42	8	12	50.442	0.555	1	1	1	1	1	0	526	6	12	0.241284	0.00743898	7.47e-05	7.47e-05	261
SUCRtex_b1377	49	0.0274733	0.683685	1	68	140	60	110	0.550265	0.399471	0.449735	1134	378	42	0	37	12	19	43	5	9	17	27	9	33	5	14	11	21	24	17	5	27	40.354	0.74	3	3	3	3	3	3	377	0	0	0	0	0	0	0
H2Otex_b1377	49	0.0274733	0.683685	1	68	140	60	110	0.550265	0.399471	0.449735	1134	378	42	0	37	12	19	43	5	9	17	27	9	33	5	14	11	21	24	17	5	27	40.354	0.74	3	3	3	3	3	3	377	1	1	1	0	2.13e-05	2.13e-05	170
GMPtex_b0929	44	1.53858	2.15677	0	56	129	52	126	0.556474	0.385675	0.490358	1089	363	34	0	27	14	19	49	1	14	19	23	5	32	5	13	12	16	22	26	2	29	37.082	0.832	3	3	3	3	3	3	362	0	0	0	0	0	0	0
TTRCYCtex_b0241	57	0.045701	0.726706	0	70	118	72	92	0.502841	0.372159	0.465909	1056	352	31	0	31	14	21	37	1	14	25	23	9	27	3	17	12	21	24	16	3	22	46.295	0.669	3	3	3	3	3	3	351	1	1	1	0	2.13e-05	2.13e-05	326
FACOAE80_b0452	204	0.111435	0.81707	0	49	82	83	73	0.637631	0.393728	0.543554	861	287	22	1	12	19	16	21	12	12	10	31	5	11	20	16	16	20	10	21	3	8	48.274	0.628	0	0	0	0	0	0	286	1	10	0.306327	0	2.13e-05	2.13e-05	306
FRUpts2pp_b1818	96	0.198948	1.09694	5	32	89	68	78	0.599251	0.400749	0.546816	801	267	40	2	8	6	10	25	4	32	3	27	13	14	8	9	5	10	15	28	2	5	38.328	0.759	0	0	0	0	0	0	266	0	0	0	0	0	0	0
TYRt2rpp_b0576	42	0.105239	0.9033	0	55	112	170	122	0.546841	0.392157	0.636166	1377	459	44	3	7	14	32	42	7	36	12	65	19	21	16	10	19	28	15	39	13	16	43.222	0.659	5	5	5	5	5	5	458	5	11	0.315072	2.59e-06	6.4e-05	6.4e-05	261
METSOX1tex_b0241	57	0.045701	0.726706	0	70	118	72	92	0.502841	0.372159	0.465909	1056	352	31	0	31	14	21	37	1	14	25	23	9	27	3	17	12	21	24	16	3	22	46.295	0.669	3	3	3	3	3	3	351	0	0	0	0	0	0	0
BTNtex_b1377	49	0.0274733	0.683685	1	68	140	60	110	0.550265	0.399471	0.449735	1134	378	42	0	37	12	19	43	5	9	17	27	9	33	5	14	11	21	24	17	5	27	40.354	0.74	3	3	3	3	3	3	377	8	11	0.315072	3.39e-07	9.61e-05	9.61e-05	261
XMPtex_b0241	57	0.045701	0.726706	0	70	118	72	92	0.502841	0.372159	0.465909	1056	352	31	0	31	14	21	37	1	14	25	23	9	27	3	17	12	21	24	16	3	22	46.295	0.669	3	3	3	3	3	3	351	0	0	0	0	0	0	0
G3PItex_b2215	64	0.0280042	1.90111	9	51	107	58	152	0.570652	0.377717	0.570652	1104	368	29	0	32	11	19	48	1	10	17	27	4	32	4	21	13	17	24	25	4	29	29.032	0.898	3	3	3	3	3	3	367	0	0	0	0	0	0	0
TMAOtex_b1377	49	0.0274733	0.683685	1	68	140	60	110	0.550265	0.399471	0.449735	1134	378	42	0	37	12	19	43	5	9	17	27	9	33	5	14	11	21	24	17	5	27	40.354	0.74	3	3	3	3	3	3	377	0	0	0	0	0	0	0
REPHACCOAI_b1394	166	0.0853922	0.812565	0	65	63	76	59	0.669202	0.452471	0.513308	789	263	32	5	16	13	9	24	4	9	9	34	8	10	11	13	19	10	15	15	3	3	49.397	0.544	1	1	1	1	1	1	262	0	0	0	0	0	0	0
GTHRDabcpp_b0832	295	0.324365	0.782929	1	39	89	95	81	0.582237	0.430921	0.578947	912	304	39	1	13	6	21	23	5	27	4	37	9	10	14	8	20	15	11	27	8	5	47.246	0.571	4	4	4	4	4	4	303	1	13	0.194785	0	2.13e-05	2.13e-05	261
CA2tex_b2215	64	0.0280042	1.90111	9	51	107	58	152	0.570652	0.377717	0.570652	1104	368	29	0	32	11	19	48	1	10	17	27	4	32	4	21	13	17	24	25	4	29	29.032	0.898	3	3	3	3	3	3	367	336	9	0.424022	0.000798	0.00359666	0.00359666	91
ISETACabcpp_b0934	131	0.143896	0.750857	0	32	55	111	66	0.560606	0.443182	0.670455	792	264	24	0	5	9	9	23	5	25	5	45	6	6	12	5	13	20	11	22	13	5	45.2	0.534	0	0	0	0	0	0	263	0	0	0	0	0	0	0
DDGLCNtex_b0929	44	1.53858	2.15677	0	56	129	52	126	0.556474	0.385675	0.490358	1089	363	34	0	27	14	19	49	1	14	19	23	5	32	5	13	12	16	22	26	2	29	37.082	0.832	3	3	3	3	3	3	362	0	0	0	0	0	0	0
LPLIPAL1A140pp_b0494	210	0.032285	0.623363	0	31	51	67	60	0.593301	0.382775	0.607656	627	209	22	0	12	7	11	10	4	7	8	29	7	11	14	17	11	11	6	10	6	5	46.887	0.587	0	0	0	0	0	0	208	2	12	0.138277	0	3.2e-05	3.2e-05	197
RNDR4b_b1064	47	0.20258	1.64716	2	41	52	50	73	0.569444	0.333333	0.569444	648	216	18	2	19	9	7	9	4	13	18	28	6	12	12	6	11	12	6	13	2	8	49.087	0.608	0	0	0	0	0	0	215	3	12	0.210012	1.53e-05	4.27e-05	4.27e-05	261
GAL1Ptex_b2215	64	0.0280042	1.90111	9	51	107	58	152	0.570652	0.377717	0.570652	1104	368	29	0	32	11	19	48	1	10	17	27	4	32	4	21	13	17	24	25	4	29	29.032	0.898	3	3	3	3	3	3	367	0	0	0	0	0	0	0
CHTBSptspp_b2416	315	0.342568	1.34241	0	114	167	148	147	0.619792	0.357639	0.512153	1728	576	63	4	39	60	18	36	8	51	35	58	18	17	15	21	31	26	29	35	2	9	43.52	0.718	0	0	0	0	0	0	575	0	0	0	0	0	0	0
FUSAtpp_b2470	115	0.163002	1.06518	1	148	234	351	305	0.593449	0.408478	0.631985	3114	1038	107	4	47	47	50	81	11	56	35	110	40	42	43	55	47	67	64	90	11	30	46.359	0.628	2	2	2	2	2	2	1037	1	1	1	0	2.13e-05	2.13e-05	125
HISabcpp_b2307	75	0.0323296	0.987161	0	31	69	71	68	0.48954	0.41841	0.58159	717	239	24	3	3	9	16	13	5	23	7	33	3	6	9	4	12	14	19	16	5	14	49.333	0.6	0	0	0	0	0	0	238	1	13	0.19337	0	2.13e-05	2.13e-05	261
ACONTa_b1276	370	0.122075	1.24331	0	176	231	243	242	0.616592	0.42713	0.543722	2676	892	77	7	57	55	23	78	18	43	43	84	25	33	50	27	51	51	54	73	13	29	49.893	0.602	0	0	0	0	0	0	891	186	10	0.331171	0.0010644	0.00199577	0.00199577	91
S2FE2SR_b1681	47	0.201335	0.975905	1	80	94	137	113	0.620283	0.389151	0.589623	1272	424	44	3	21	25	15	29	23	21	15	49	6	24	13	29	24	23	25	24	3	7	43.261	0.61	0	0	0	0	0	0	423	359	9	0.420096	0.0336325	0.00384213	0.00384213	302
SPMDAT2_b1584	86	0.0585394	0.819448	0	34	59	48	46	0.609626	0.294118	0.502674	561	187	13	2	8	19	9	9	10	11	11	19	5	7	6	9	12	7	5	12	1	11	45.523	0.614	0	0	0	0	0	0	186	0	0	0	0	0	0	0
DHQS_b3389	532	0.0354455	1.19472	0	55	103	113	92	0.636364	0.424242	0.564738	1089	363	39	5	15	24	10	34	7	16	13	49	10	11	16	12	20	20	18	32	2	9	48.702	0.554	0	0	0	0	0	0	362	170	10	0.375306	0.000717	0.00182501	0.00182501	91
GALTptspp_b2093	61	0.590415	1.73148	5	20	37	22	16	0.484211	0.368421	0.4	285	95	7	4	3	7	2	8	3	13	5	7	4	4	3	4	3	3	6	7	0	1	44.364	0.565	0	0	0	0	0	0	94	0	0	0	0	0	0	0
ECOAH8_b3846	59	0.0262198	1.63496	4	132	143	208	247	0.643836	0.389041	0.623288	2190	730	82	5	44	50	30	62	11	37	54	74	21	24	40	24	31	26	30	58	8	18	39.202	0.724	1	1	1	1	1	1	729	2	1	1	0	3.2e-05	3.2e-05	175
SERtex_b0929	44	1.53858	2.15677	0	56	129	52	126	0.556474	0.385675	0.490358	1089	363	34	0	27	14	19	49	1	14	19	23	5	32	5	13	12	16	22	26	2	29	37.082	0.832	3	3	3	3	3	3	362	5	11	0.315559	3.1e-06	6.4e-05	6.4e-05	261
GLUN_b1524	155	0.0378588	0.803837	0	55	90	100	64	0.618123	0.411003	0.530744	927	309	34	4	13	16	11	25	7	20	8	27	11	12	12	18	17	22	9	31	4	7	47.235	0.572	1	1	1	1	1	1	308	1	11	0.250511	0	2.13e-05	2.13e-05	91
ACACT2r_b3845	151	0.130464	1.47873	1	50	103	130	105	0.659794	0.466495	0.60567	1164	388	57	7	18	20	11	37	12	20	11	36	21	13	16	13	23	23	16	28	2	3	39.064	0.685	2	2	2	2	2	2	387	7	1	1	0	8.54e-05	8.54e-05	173
PLIPA1E141pp_b3821	101	0.0282509	0.656571	0	38	73	92	87	0.524138	0.396552	0.617241	870	290	18	0	16	15	10	23	5	9	10	29	8	20	13	12	13	19	18	18	10	23	46.721	0.641	0	0	0	0	0	0	289	5	11	0.159797	0.000211	6.4e-05	6.4e-05	198
CU1abcpp_b0484	541	0.177761	1.06217	0	139	174	307	215	0.665868	0.457485	0.62515	2505	835	120	6	42	43	15	68	14	45	28	90	26	19	35	42	39	53	51	78	10	10	43.456	0.653	0	0	0	0	0	0	834	0	0	0	0	0	0	0
SELR_b1588	14	0.0221629	0.767633	0	157	216	185	250	0.561881	0.435644	0.538366	2424	808	67	13	48	50	20	65	23	52	45	55	25	38	44	24	48	49	49	45	17	30	52.085	0.598	2	2	2	2	2	2	807	0	0	0	0	0	0	0
UPLA4FNT_b2254	135	0.0630863	1.22693	0	50	94	80	99	0.55418	0.386997	0.55418	969	323	24	4	13	21	15	21	10	30	9	32	12	11	12	11	24	21	17	22	2	11	49.718	0.594	0	0	0	0	0	0	322	64	11	0.334334	0.000232	0.000694	0.000694	306
PACALDtex_b0929	44	1.53858	2.15677	0	56	129	52	126	0.556474	0.385675	0.490358	1089	363	34	0	27	14	19	49	1	14	19	23	5	32	5	13	12	16	22	26	2	29	37.082	0.832	3	3	3	3	3	3	362	0	0	0	0	0	0	0
PROGLYtex_b0929	44	1.53858	2.15677	0	56	129	52	126	0.556474	0.385675	0.490358	1089	363	34	0	27	14	19	49	1	14	19	23	5	32	5	13	12	16	22	26	2	29	37.082	0.832	3	3	3	3	3	3	362	0	0	0	0	0	0	0
ARBt3ipp_b1528	44	0.246161	0.917234	0	64	98	135	100	0.516373	0.43073	0.59194	1191	397	50	3	3	7	24	30	7	37	7	60	16	8	13	12	13	30	23	36	9	8	49.776	0.519	0	0	0	0	0	0	396	0	0	0	0	0	0	47
RNTR4c2_b3924	118	0.00451925	0.685642	0	59	46	76	68	0.62249	0.405622	0.578313	747	249	19	2	12	17	7	17	7	7	12	32	8	6	14	11	14	12	19	20	4	8	46.934	0.553	0	0	0	0	0	0	248	4	10	0.316865	7.84e-06	5.34e-05	5.34e-05	306
HYD2pp_b2997	72	0.472132	1.22809	0	64	103	83	123	0.627346	0.450402	0.552279	1119	373	38	13	13	26	9	44	17	21	18	26	6	19	21	11	15	16	17	29	4	9	42.937	0.689	1	1	1	1	1	1	372	1	13	0.194414	0	2.13e-05	2.13e-05	261
GSNtex_b1377	49	0.0274733	0.683685	1	68	140	60	110	0.550265	0.399471	0.449735	1134	378	42	0	37	12	19	43	5	9	17	27	9	33	5	14	11	21	24	17	5	27	40.354	0.74	3	3	3	3	3	3	377	0	0	0	0	0	0	0
AGMtex_b0929	44	1.53858	2.15677	0	56	129	52	126	0.556474	0.385675	0.490358	1089	363	34	0	27	14	19	49	1	14	19	23	5	32	5	13	12	16	22	26	2	29	37.082	0.832	3	3	3	3	3	3	362	9	11	0.316783	1.08e-05	0.000107	0.000107	261
ACACT6r_b2342	127	0.202332	1.34639	2	82	117	128	110	0.649886	0.480549	0.544622	1311	437	63	2	19	23	13	39	9	19	13	46	16	10	19	18	31	25	28	32	3	8	51.067	0.599	2	2	2	2	2	2	436	2	1	1	0	3.2e-05	3.2e-05	95
HACD1_b2341	124	0.0138785	1.06552	4	141	202	204	168	0.61958	0.427972	0.52028	2145	715	75	9	30	44	24	69	13	52	40	68	16	20	38	35	44	32	37	53	2	13	52.384	0.575	4	4	4	4	4	2	714	7	1	1	0	8.54e-05	8.54e-05	173
ASPO5_b2574	445	0.356383	0.852915	0	86	160	142	153	0.628466	0.421442	0.545287	1623	541	47	9	33	36	15	41	26	32	12	52	13	21	23	15	41	29	30	40	8	17	49.033	0.577	0	0	0	0	0	0	540	269	9	0.405763	0.000782	0.0028816	0.0028816	91
GNK_b4268	110	0.234693	0.856666	2	52	68	38	30	0.553191	0.388298	0.361702	564	188	16	4	15	11	6	12	5	14	12	19	5	6	6	10	13	15	4	8	2	4	55.28	0.49	1	1	1	1	1	1	187	1	13	0.193645	0	2.13e-05	2.13e-05	261
THMabcpp_b0068	99	0.615484	0.612812	0	63	68	93	104	0.588415	0.408537	0.60061	984	328	38	4	17	17	15	19	2	4	26	37	4	16	20	14	8	17	19	28	9	13	44.382	0.653	0	0	0	0	0	0	327	0	0	0	0	0	0	0
AKGtex_b0241	57	0.045701	0.726706	0	70	118	72	92	0.502841	0.372159	0.465909	1056	352	31	0	31	14	21	37	1	14	25	23	9	27	3	17	12	21	24	16	3	22	46.295	0.669	3	3	3	3	3	3	351	3	11	0.314667	0	4.27e-05	4.27e-05	261
GDPtex_b1377	49	0.0274733	0.683685	1	68	140	60	110	0.550265	0.399471	0.449735	1134	378	42	0	37	12	19	43	5	9	17	27	9	33	5	14	11	21	24	17	5	27	40.354	0.74	3	3	3	3	3	3	377	0	0	0	0	0	0	0
TMAOR1pp_b1873	40	0.195518	0.837065	0	88	109	85	85	0.544959	0.414169	0.463215	1101	367	42	10	24	23	11	25	15	18	27	30	10	11	11	20	10	26	22	14	5	12	56.355	0.572	1	1	1	1	1	1	366	0	0	0	0	0	0	0
XAND_b2868	317	0.0190458	0.631741	1	40	37	44	39	0.5625	0.48125	0.51875	480	160	15	11	3	12	2	17	3	9	9	17	5	4	6	7	6	6	15	8	1	3	51.882	0.524	0	0	0	0	0	0	159	0	0	0	0	0	0	179
3PEPTtex_b0929	44	1.53858	2.15677	0	56	129	52	126	0.556474	0.385675	0.490358	1089	363	34	0	27	14	19	49	1	14	19	23	5	32	5	13	12	16	22	26	2	29	37.082	0.832	3	3	3	3	3	3	362	13	11	0.32186	3.28e-05	0.000149	0.000149	306
NO3R1bpp_b2203	103	0.112598	0.633556	0	24	35	52	39	0.586667	0.473333	0.606667	450	150	12	5	6	6	4	12	5	4	7	7	6	6	12	9	7	10	11	13	2	5	42.809	0.678	0	0	0	0	0	0	149	0	0	0	0	0	0	0
FRUURtex_b0929	44	1.53858	2.15677	0	56	129	52	126	0.556474	0.385675	0.490358	1089	363	34	0	27	14	19	49	1	14	19	23	5	32	5	13	12	16	22	26	2	29	37.082	0.832	3	3	3	3	3	3	362	0	0	0	0	0	0	0
NADH17pp_b2281	361	0.0217583	0.774597	0	35	30	49	67	0.569061	0.41989	0.640884	543	181	12	9	9	18	8	14	1	10	11	15	6	4	13	4	13	5	8	9	2	9	38.494	0.714	2	1	1	0	0	0	180	0	0	0	0	0	0	224
MOBDabcpp_b0763	193	0.0413747	1.14271	0	58	76	71	53	0.616279	0.430233	0.48062	774	258	42	0	16	12	11	18	3	10	22	21	3	9	10	8	7	16	14	24	4	7	41.288	0.697	0	0	0	0	0	0	257	336	9	0.424022	0.000798	0.00359666	0.00359666	91
ALLTNtex_b2215	64	0.0280042	1.90111	9	51	107	58	152	0.570652	0.377717	0.570652	1104	368	29	0	32	11	19	48	1	10	17	27	4	32	4	21	13	17	24	25	4	29	29.032	0.898	3	3	3	3	3	3	367	5	11	0.315315	0.000169	6.4e-05	6.4e-05	261
BSORy_b3551	26	0.250602	0.861676	0	128	214	242	194	0.615681	0.456298	0.560411	2334	778	81	10	38	49	30	70	26	35	22	65	20	32	41	38	42	50	38	45	23	22	47.214	0.624	2	2	2	2	2	2	777	0	0	0	0	0	0	0
ACMANAptspp_b1817	129	0.203139	1.45523	6	77	86	73	88	0.626543	0.385802	0.496914	972	324	37	0	20	23	7	22	4	19	25	25	10	14	17	7	14	9	22	39	4	5	44.127	0.68	0	0	0	0	0	0	323	0	0	0	0	0	0	0
CHTBStex_b0929	44	1.53858	2.15677	0	56	129	52	126	0.556474	0.385675	0.490358	1089	363	34	0	27	14	19	49	1	14	19	23	5	32	5	13	12	16	22	26	2	29	37.082	0.832	3	3	3	3	3	3	362	0	0	0	0	0	0	0
2AGPE140tipp_b2835	60	0.122308	0.614945	0	50	93	149	106	0.580402	0.444724	0.640704	1194	398	57	4	4	9	20	43	4	26	12	57	14	16	14	10	10	22	18	38	9	10	50.482	0.583	0	0	0	0	0	0	397	5	11	0.159797	0.000208	6.4e-05	6.4e-05	197
TYRtex_b0929	44	1.53858	2.15677	0	56	129	52	126	0.556474	0.385675	0.490358	1089	363	34	0	27	14	19	49	1	14	19	23	5	32	5	13	12	16	22	26	2	29	37.082	0.832	3	3	3	3	3	3	362	5	11	0.315072	2.59e-06	6.4e-05	6.4e-05	261
NAt3pp_b1216	86	11.7	120.427	6	65	108	108	86	0.547684	0.386921	0.52861	1101	367	44	1	10	10	20	22	12	27	8	61	14	12	13	10	7	30	21	34	3	7	50.381	0.536	0	0	0	0	0	0	366	0	0	0	0	0	0	232
FHL_b2483	12	0.0269638	0.429724	0	54	76	106	80	0.598101	0.424051	0.588608	948	316	33	4	6	12	21	26	5	20	6	63	12	3	12	9	14	20	18	20	7	4	47.767	0.549	1	1	1	1	1	1	315	6	12	0.241284	0.00743898	7.47e-05	7.47e-05	261
NI2tex_b2215	64	0.0280042	1.90111	9	51	107	58	152	0.570652	0.377717	0.570652	1104	368	29	0	32	11	19	48	1	10	17	27	4	32	4	21	13	17	24	25	4	29	29.032	0.898	3	3	3	3	3	3	367	336	9	0.424022	0.000798	0.00359666	0.00359666	91
CLPNS161pp_b1249	74	0.0880751	0.417833	0	78	134	139	136	0.574949	0.410678	0.564682	1461	487	51	5	26	22	18	31	10	37	16	60	24	12	21	16	35	25	19	30	13	15	50.55	0.55	0	0	0	0	0	0	486	27	10	0.30872	0.000831	0.000299	0.000299	306
PAPSR2_b1064	47	0.20258	1.64716	2	41	52	50	73	0.569444	0.333333	0.569444	648	216	18	2	19	9	7	9	4	13	18	28	6	12	12	6	11	12	6	13	2	8	49.087	0.608	0	0	0	0	0	0	215	7	11	0.315884	0.00356214	8.54e-05	8.54e-05	261
GALTptspp_b2416	315	0.342568	1.34241	0	114	167	148	147	0.619792	0.357639	0.512153	1728	576	63	4	39	60	18	36	8	51	35	58	18	17	15	21	31	26	29	35	2	9	43.52	0.718	0	0	0	0	0	0	575	0	0	0	0	0	0	0
NO2tex_b2215	64	0.0280042	1.90111	9	51	107	58	152	0.570652	0.377717	0.570652	1104	368	29	0	32	11	19	48	1	10	17	27	4	32	4	21	13	17	24	25	4	29	29.032	0.898	3	3	3	3	3	3	367	0	0	0	0	0	0	0
FUM_b1611	434	0.0403856	0.542771	0	91	103	153	121	0.608974	0.418803	0.58547	1404	468	57	7	19	33	11	34	15	22	24	52	18	26	19	18	21	28	25	29	5	4	49.06	0.614	1	1	1	1	1	1	467	0	0	0	0	0	0	124
Kt2pp_b1291	45	0.131621	0.697149	0	60	92	99	80	0.574018	0.425982	0.540785	993	331	22	8	15	20	8	19	9	22	16	37	12	14	20	16	28	16	20	15	7	6	46.414	0.604	3	3	3	3	3	3	330	2	10	0.311546	1.05e-06	3.2e-05	3.2e-05	302
CLt3_2pp_b1592	39	0.0316543	0.781652	0	74	105	129	111	0.577566	0.477327	0.572792	1257	419	57	8	8	9	17	39	9	24	5	75	15	9	18	14	15	29	26	24	8	9	53.136	0.496	0	0	0	0	0	0	418	336	9	0.424022	0.000798	0.00359666	0.00359666	91
GTHRDHpp_b3447	241	0.342348	0.940811	0	89	126	188	178	0.593804	0.42685	0.629948	1743	581	65	1	38	28	18	56	8	28	39	44	17	27	35	20	16	38	33	44	4	21	43.855	0.651	0	0	0	0	0	0	580	5	12	0.240905	0.00166306	6.4e-05	6.4e-05	261
UACGAMtex_b1377	49	0.0274733	0.683685	1	68	140	60	110	0.550265	0.399471	0.449735	1134	378	42	0	37	12	19	43	5	9	17	27	9	33	5	14	11	21	24	17	5	27	40.354	0.74	3	3	3	3	3	3	377	0	0	0	0	0	0	0
HKNTDH_b0349	32	0.284019	0.745093	13	36	76	93	84	0.615917	0.411765	0.612457	867	289	20	3	18	14	15	27	8	13	11	35	9	16	13	10	18	19	13	17	6	3	40.677	0.692	0	0	0	0	0	0	288	0	0	0	0	0	0	0
ARGtex_b1377	49	0.0274733	0.683685	1	68	140	60	110	0.550265	0.399471	0.449735	1134	378	42	0	37	12	19	43	5	9	17	27	9	33	5	14	11	21	24	17	5	27	40.354	0.74	3	3	3	3	3	3	377	19	11	0.31843	0.00111705	0.000213	0.000213	261
DADNtex_b0411	49	0.0397702	1.70132	0	35	76	63	121	0.491525	0.4	0.623729	885	295	20	0	23	9	19	31	7	13	13	19	6	26	8	8	9	21	14	13	14	21	35.71	0.816	0	0	0	0	0	0	294	0	0	0	0	0	0	0
NACtex_b0241	57	0.045701	0.726706	0	70	118	72	92	0.502841	0.372159	0.465909	1056	352	31	0	31	14	21	37	1	14	25	23	9	27	3	17	12	21	24	16	3	22	46.295	0.669	3	3	3	3	3	3	351	0	0	0	0	0	0	0
HG2tex_b0241	57	0.045701	0.726706	0	70	118	72	92	0.502841	0.372159	0.465909	1056	352	31	0	31	14	21	37	1	14	25	23	9	27	3	17	12	21	24	16	3	22	46.295	0.669	3	3	3	3	3	3	351	0	0	0	0	0	0	0
DUMPtex_b2215	64	0.0280042	1.90111	9	51	107	58	152	0.570652	0.377717	0.570652	1104	368	29	0	32	11	19	48	1	10	17	27	4	32	4	21	13	17	24	25	4	29	29.032	0.898	3	3	3	3	3	3	367	0	0	0	0	0	0	0
G3PGtex_b0241	57	0.045701	0.726706	0	70	118	72	92	0.502841	0.372159	0.465909	1056	352	31	0	31	14	21	37	1	14	25	23	9	27	3	17	12	21	24	16	3	22	46.295	0.669	3	3	3	3	3	3	351	2	11	0.314587	0	3.2e-05	3.2e-05	261
MLTGY4pp_b2701	162	0.420148	0.872148	0	51	75	127	109	0.588398	0.414365	0.651934	1086	362	31	1	18	10	17	33	7	12	16	33	11	20	22	26	17	18	20	24	8	17	46.593	0.649	0	0	0	0	0	0	361	11	11	0.251799	0	0.000128	0.000128	306
SPODM_b3908	318	0.459096	1.63019	0	38	41	59	69	0.594203	0.386473	0.618357	621	207	26	0	12	13	11	13	8	6	17	20	4	12	9	6	6	11	9	10	6	7	33.561	0.874	1	1	1	1	1	1	206	2	1	1	6.79e-07	3.2e-05	3.2e-05	304
ALAGLUE_b1325	100	0.518796	0.801584	0	58	87	122	55	0.639752	0.450311	0.549689	966	322	43	7	16	24	6	19	5	15	11	42	9	7	17	15	17	16	21	23	5	3	46.541	0.533	0	0	0	0	0	0	321	2	1	1	0	3.2e-05	3.2e-05	192
ZN2t3pp_b0752	222	0.146517	0.843698	2	50	87	100	77	0.636943	0.39172	0.563694	942	314	32	3	12	16	9	20	25	21	4	45	11	9	14	7	16	17	14	27	7	4	55.159	0.539	0	0	0	0	0	0	313	0	0	0	0	0	0	334
ASPK_b0002	138	0.992219	1.81833	3	128	220	231	242	0.612667	0.403167	0.576127	2463	821	91	12	44	53	30	63	14	46	34	89	23	38	29	30	46	51	34	69	4	20	47.407	0.606	0	0	0	0	0	0	820	179	10	0.329922	0.000393	0.00192107	0.00192107	91
HCINNMtex_b2215	64	0.0280042	1.90111	9	51	107	58	152	0.570652	0.377717	0.570652	1104	368	29	0	32	11	19	48	1	10	17	27	4	32	4	21	13	17	24	25	4	29	29.032	0.898	3	3	3	3	3	3	367	0	0	0	0	0	0	0
2AGPEAT160_b2836	53	0.183582	0.630585	1	136	179	211	194	0.611111	0.405556	0.5625	2160	720	55	4	30	45	36	55	16	39	38	78	23	13	41	27	51	33	44	61	8	22	47.712	0.603	0	0	0	0	0	0	719	4	9	0.260583	0.000761	5.34e-05	5.34e-05	198
MOBDabcpp_b2425	85	0.298743	1.753	7	54	57	115	113	0.566372	0.374631	0.672566	1017	339	31	0	21	17	16	24	5	12	28	33	5	23	14	17	11	19	20	24	7	11	37.714	0.735	1	1	1	1	1	1	338	336	9	0.424022	0.000798	0.00359666	0.00359666	91
GBBTNtex_b2215	64	0.0280042	1.90111	9	51	107	58	152	0.570652	0.377717	0.570652	1104	368	29	0	32	11	19	48	1	10	17	27	4	32	4	21	13	17	24	25	4	29	29.032	0.898	3	3	3	3	3	3	367	0	0	0	0	0	0	0
LYSt2pp_b2156	82	0.354235	0.882675	0	55	121	161	153	0.526531	0.436735	0.640816	1470	490	49	3	12	14	35	53	5	46	14	52	16	15	19	11	17	29	29	33	15	22	37.615	0.74	4	4	4	4	4	4	489	1	13	0.194506	0	2.13e-05	2.13e-05	261
R5PPpp_b4055	74	0.14684	0.511661	0	47	74	53	64	0.542017	0.44958	0.491597	714	238	23	1	14	11	13	15	3	16	12	14	5	15	16	8	13	20	13	16	5	4	52.306	0.599	0	0	0	0	0	0	237	0	0	0	0	0	0	0
GALCTtex_b0241	57	0.045701	0.726706	0	70	118	72	92	0.502841	0.372159	0.465909	1056	352	31	0	31	14	21	37	1	14	25	23	9	27	3	17	12	21	24	16	3	22	46.295	0.669	3	3	3	3	3	3	351	0	0	0	0	0	0	0
NO3tex_b1377	49	0.0274733	0.683685	1	68	140	60	110	0.550265	0.399471	0.449735	1134	378	42	0	37	12	19	43	5	9	17	27	9	33	5	14	11	21	24	17	5	27	40.354	0.74	3	3	3	3	3	3	377	0	0	0	0	0	0	0
THRA2i_b0870	222	0.0943977	0.689047	0	54	76	93	111	0.652695	0.422156	0.610778	1002	334	47	4	20	22	8	25	8	16	13	35	11	15	11	11	23	12	15	23	4	10	46.2	0.626	0	0	0	0	0	0	333	1	1	1	0	2.13e-05	2.13e-05	57
3GMPtex_b0241	57	0.045701	0.726706	0	70	118	72	92	0.502841	0.372159	0.465909	1056	352	31	0	31	14	21	37	1	14	25	23	9	27	3	17	12	21	24	16	3	22	46.295	0.669	3	3	3	3	3	3	351	0	0	0	0	0	0	0
PNTOtex_b0929	44	1.53858	2.15677	0	56	129	52	126	0.556474	0.385675	0.490358	1089	363	34	0	27	14	19	49	1	14	19	23	5	32	5	13	12	16	22	26	2	29	37.082	0.832	3	3	3	3	3	3	362	0	0	0	0	0	0	0
ECOAH5_b3846	59	0.0262198	1.63496	4	132	143	208	247	0.643836	0.389041	0.623288	2190	730	82	5	44	50	30	62	11	37	54	74	21	24	40	24	31	26	30	58	8	18	39.202	0.724	1	1	1	1	1	1	729	3	1	1	0	4.27e-05	4.27e-05	174
LPLIPAL2G120_b3825	63	0.201587	0.617796	0	60	99	89	93	0.648094	0.431085	0.533724	1023	341	33	3	23	18	21	26	16	18	5	26	8	10	17	14	36	11	14	24	7	10	54.742	0.58	0	0	0	0	0	0	340	4	10	0.161652	0.00148701	5.34e-05	5.34e-05	198
TYMtex_b0929	44	1.53858	2.15677	0	56	129	52	126	0.556474	0.385675	0.490358	1089	363	34	0	27	14	19	49	1	14	19	23	5	32	5	13	12	16	22	26	2	29	37.082	0.832	3	3	3	3	3	3	362	0	0	0	0	0	0	0
H2tex_b2215	64	0.0280042	1.90111	9	51	107	58	152	0.570652	0.377717	0.570652	1104	368	29	0	32	11	19	48	1	10	17	27	4	32	4	21	13	17	24	25	4	29	29.032	0.898	3	3	3	3	3	3	367	4	11	0.316292	0.00274462	5.34e-05	5.34e-05	261
SUCRtex_b0241	57	0.045701	0.726706	0	70	118	72	92	0.502841	0.372159	0.465909	1056	352	31	0	31	14	21	37	1	14	25	23	9	27	3	17	12	21	24	16	3	22	46.295	0.669	3	3	3	3	3	3	351	0	0	0	0	0	0	0
LEUtex_b1377	49	0.0274733	0.683685	1	68	140	60	110	0.550265	0.399471	0.449735	1134	378	42	0	37	12	19	43	5	9	17	27	9	33	5	14	11	21	24	17	5	27	40.354	0.74	3	3	3	3	3	3	377	9	11	0.315396	0.000829	0.000107	0.000107	261
ISETACtex_b0929	44	1.53858	2.15677	0	56	129	52	126	0.556474	0.385675	0.490358	1089	363	34	0	27	14	19	49	1	14	19	23	5	32	5	13	12	16	22	26	2	29	37.082	0.832	3	3	3	3	3	3	362	0	0	0	0	0	0	0
SLNTtex_b1377	49	0.0274733	0.683685	1	68	140	60	110	0.550265	0.399471	0.449735	1134	378	42	0	37	12	19	43	5	9	17	27	9	33	5	14	11	21	24	17	5	27	40.354	0.74	3	3	3	3	3	3	377	0	0	0	0	0	0	0
GND_b2029	312	0.0225629	1.2145	0	75	149	109	136	0.597015	0.385928	0.522388	1407	469	51	2	27	34	17	41	4	35	28	40	7	20	16	21	20	25	22	29	4	25	38.056	0.762	0	0	0	0	0	0	468	0	0	0	0	0	0	161
NO3R1pp_b1467	81	0.0607732	0.893199	0	90	96	134	195	0.576699	0.413592	0.638835	1545	515	32	18	29	43	17	40	10	31	27	33	19	20	31	16	35	26	20	33	11	23	40.551	0.689	5	5	4	4	3	1	514	0	0	0	0	0	0	0
DCMPtex_b1377	49	0.0274733	0.683685	1	68	140	60	110	0.550265	0.399471	0.449735	1134	378	42	0	37	12	19	43	5	9	17	27	9	33	5	14	11	21	24	17	5	27	40.354	0.74	3	3	3	3	3	3	377	0	0	0	0	0	0	0
FDH4pp_b1474	69	0.0935115	0.545956	0	139	237	323	317	0.563976	0.431102	0.629921	3048	1016	91	13	53	55	36	86	22	40	53	82	27	68	51	38	50	57	62	63	27	40	40.985	0.727	1	1	1	1	1	1	1014	1	11	0.228715	0	2.13e-05	2.13e-05	302
AP4AS_b4129	349	0.63228	1.15452	0	107	172	115	112	0.612648	0.36166	0.448617	1518	506	41	1	36	46	31	33	11	31	20	45	18	20	19	21	41	17	29	28	2	15	44.624	0.687	1	1	1	1	1	1	505	1	1	1	0	2.13e-05	2.13e-05	40
ACMANAptspp_b2416	315	0.342568	1.34241	0	114	167	148	147	0.619792	0.357639	0.512153	1728	576	63	4	39	60	18	36	8	51	35	58	18	17	15	21	31	26	29	35	2	9	43.52	0.718	0	0	0	0	0	0	575	0	0	0	0	0	0	0
G3PCtex_b0241	57	0.045701	0.726706	0	70	118	72	92	0.502841	0.372159	0.465909	1056	352	31	0	31	14	21	37	1	14	25	23	9	27	3	17	12	21	24	16	3	22	46.295	0.669	3	3	3	3	3	3	351	0	0	0	0	0	0	0
CHRPL_b4039	56	0.327773	0.629881	0	43	31	62	30	0.584337	0.445783	0.554217	498	166	8	2	6	14	5	11	1	6	7	32	3	1	13	6	14	11	11	6	4	4	47.51	0.5	0	0	0	0	0	0	165	336	9	0.424022	0.000798	0.00359666	0.00359666	91
CITtex_b0929	44	1.53858	2.15677	0	56	129	52	126	0.556474	0.385675	0.490358	1089	363	34	0	27	14	19	49	1	14	19	23	5	32	5	13	12	16	22	26	2	29	37.082	0.832	3	3	3	3	3	3	362	3	11	0.31491	0.000829	4.27e-05	4.27e-05	261
NTP3pp_b0980	52	0.211428	1.27464	0	100	94	142	97	0.600462	0.464203	0.551963	1299	433	40	8	19	21	13	29	8	17	15	58	6	16	32	30	22	28	34	24	8	4	53.672	0.506	0	0	0	0	0	0	432	0	0	0	0	0	0	0
5DGLCNtex_b0929	44	1.53858	2.15677	0	56	129	52	126	0.556474	0.385675	0.490358	1089	363	34	0	27	14	19	49	1	14	19	23	5	32	5	13	12	16	22	26	2	29	37.082	0.832	3	3	3	3	3	3	362	6	11	0.315234	0.000578	7.47e-05	7.47e-05	261
GMPtex_b1377	49	0.0274733	0.683685	1	68	140	60	110	0.550265	0.399471	0.449735	1134	378	42	0	37	12	19	43	5	9	17	27	9	33	5	14	11	21	24	17	5	27	40.354	0.74	3	3	3	3	3	3	377	0	0	0	0	0	0	0
GALKr_b0757	212	0.069853	0.657721	0	75	95	87	126	0.634465	0.396867	0.556136	1149	383	39	9	20	26	13	33	9	22	16	30	9	17	14	23	18	19	18	36	1	10	44.999	0.675	0	0	0	0	0	0	382	0	0	0	0	0	0	0
FE2tex_b0241	57	0.045701	0.726706	0	70	118	72	92	0.502841	0.372159	0.465909	1056	352	31	0	31	14	21	37	1	14	25	23	9	27	3	17	12	21	24	16	3	22	46.295	0.669	3	3	3	3	3	3	351	1	1	1	0	2.13e-05	2.13e-05	115
SULabcpp_b0765	149	0.235544	0.654325	0	60	83	132	78	0.623229	0.388102	0.594901	1059	353	26	2	15	21	6	25	8	21	17	54	7	15	19	17	22	22	14	27	6	8	42.315	0.592	4	4	4	4	4	1	352	7	11	0.314991	333000000	8.54e-05	8.54e-05	91
23CAMPtex_b0241	57	0.045701	0.726706	0	70	118	72	92	0.502841	0.372159	0.465909	1056	352	31	0	31	14	21	37	1	14	25	23	9	27	3	17	12	21	24	16	3	22	46.295	0.669	3	3	3	3	3	3	351	0	0	0	0	0	0	0
NADH17pp_b2286	413	0.0563958	1.32783	1	70	129	186	212	0.609715	0.400335	0.666667	1791	597	39	4	38	40	32	42	19	32	24	57	21	18	37	19	43	25	37	37	12	20	37.4	0.741	0	0	0	0	0	0	596	0	0	0	0	0	0	224
CRNDabcpp_b2677	196	0.0883796	1.01255	0	96	109	95	101	0.618454	0.36409	0.488778	1203	401	36	1	27	29	13	32	6	31	20	45	13	14	15	21	27	20	14	28	0	8	47.863	0.524	18	18	18	18	18	17	400	0	0	0	0	0	0	71
DOPAtex_b1377	49	0.0274733	0.683685	1	68	140	60	110	0.550265	0.399471	0.449735	1134	378	42	0	37	12	19	43	5	9	17	27	9	33	5	14	11	21	24	17	5	27	40.354	0.74	3	3	3	3	3	3	377	0	0	0	0	0	0	0
GLUPRT_b2312	565	0.31024	1.44982	9	62	138	122	184	0.602767	0.379447	0.604743	1518	506	47	7	36	34	22	35	10	42	17	38	12	31	19	19	39	23	20	36	1	17	41.329	0.711	0	0	0	0	0	0	505	167	10	0.330189	0.000194	0.00179299	0.00179299	91
ABUTtex_b0929	44	1.53858	2.15677	0	56	129	52	126	0.556474	0.385675	0.490358	1089	363	34	0	27	14	19	49	1	14	19	23	5	32	5	13	12	16	22	26	2	29	37.082	0.832	3	3	3	3	3	3	362	3	11	0.31491	0.000829	4.27e-05	4.27e-05	261
DGSNtex_b2215	64	0.0280042	1.90111	9	51	107	58	152	0.570652	0.377717	0.570652	1104	368	29	0	32	11	19	48	1	10	17	27	4	32	4	21	13	17	24	25	4	29	29.032	0.898	3	3	3	3	3	3	367	0	0	0	0	0	0	0
F6Ptex_b2215	64	0.0280042	1.90111	9	51	107	58	152	0.570652	0.377717	0.570652	1104	368	29	0	32	11	19	48	1	10	17	27	4	32	4	21	13	17	24	25	4	29	29.032	0.898	3	3	3	3	3	3	367	0	0	0	0	0	0	0
ABUTtex_b2215	64	0.0280042	1.90111	9	51	107	58	152	0.570652	0.377717	0.570652	1104	368	29	0	32	11	19	48	1	10	17	27	4	32	4	21	13	17	24	25	4	29	29.032	0.898	3	3	3	3	3	3	367	3	11	0.31491	0.000829	4.27e-05	4.27e-05	261
ACALDtex_b0241	57	0.045701	0.726706	0	70	118	72	92	0.502841	0.372159	0.465909	1056	352	31	0	31	14	21	37	1	14	25	23	9	27	3	17	12	21	24	16	3	22	46.295	0.669	3	3	3	3	3	3	351	3	11	0.314667	0	4.27e-05	4.27e-05	261
RBK_b3752	264	0.0703107	0.96985	0	63	108	71	68	0.654839	0.454839	0.448387	930	310	49	1	13	23	8	27	6	24	9	26	3	17	14	14	15	15	17	25	2	1	49.277	0.607	0	0	0	0	0	0	309	6	3	0.727273	1.7e-05	7.47e-05	7.47e-05	298
SUCCtex_b1377	49	0.0274733	0.683685	1	68	140	60	110	0.550265	0.399471	0.449735	1134	378	42	0	37	12	19	43	5	9	17	27	9	33	5	14	11	21	24	17	5	27	40.354	0.74	3	3	3	3	3	3	377	2	11	0.314587	0	3.2e-05	3.2e-05	261
G6Ptex_b0929	44	1.53858	2.15677	0	56	129	52	126	0.556474	0.385675	0.490358	1089	363	34	0	27	14	19	49	1	14	19	23	5	32	5	13	12	16	22	26	2	29	37.082	0.832	3	3	3	3	3	3	362	0	0	0	0	0	0	0
GLNtex_b2215	64	0.0280042	1.90111	9	51	107	58	152	0.570652	0.377717	0.570652	1104	368	29	0	32	11	19	48	1	10	17	27	4	32	4	21	13	17	24	25	4	29	29.032	0.898	3	3	3	3	3	3	367	0	0	0	0	0	0	0
BUTSO3tex_b0241	57	0.045701	0.726706	0	70	118	72	92	0.502841	0.372159	0.465909	1056	352	31	0	31	14	21	37	1	14	25	23	9	27	3	17	12	21	24	16	3	22	46.295	0.669	3	3	3	3	3	3	351	0	0	0	0	0	0	0
CD2tex_b0929	44	1.53858	2.15677	0	56	129	52	126	0.556474	0.385675	0.490358	1089	363	34	0	27	14	19	49	1	14	19	23	5	32	5	13	12	16	22	26	2	29	37.082	0.832	3	3	3	3	3	3	362	0	0	0	0	0	0	0
3PEPTabcpp_b1247	286	0.659676	0.914006	0	61	88	104	82	0.602985	0.38806	0.555224	1005	335	22	7	15	23	8	24	10	23	19	40	10	8	24	13	20	16	13	28	4	7	50.479	0.56	11	11	11	11	11	11	334	0	0	0	0	0	0	8
TARTRDtex_b1377	49	0.0274733	0.683685	1	68	140	60	110	0.550265	0.399471	0.449735	1134	378	42	0	37	12	19	43	5	9	17	27	9	33	5	14	11	21	24	17	5	27	40.354	0.74	3	3	3	3	3	3	377	0	0	0	0	0	0	0
23PDE2pp_b4213	95	0.0121502	0.840414	0	112	183	179	174	0.567901	0.371914	0.544753	1944	648	73	2	54	27	22	45	11	36	50	47	16	41	31	21	18	32	33	52	7	29	44.263	0.649	0	0	0	0	0	0	647	0	0	0	0	0	0	0
NADH18pp_b2281	361	0.0217583	0.774597	0	35	30	49	67	0.569061	0.41989	0.640884	543	181	12	9	9	18	8	14	1	10	11	15	6	4	13	4	13	5	8	9	2	9	38.494	0.714	2	1	1	0	0	0	180	1	15	0.140369	0	2.13e-05	2.13e-05	261
RNDR2b_b2675	103	0.342172	0.9737	0	118	183	196	218	0.566434	0.40979	0.579021	2145	715	70	7	38	43	33	46	18	42	25	67	18	33	22	33	47	45	50	34	6	37	48.5	0.628	0	0	0	0	0	0	714	2	13	0.194475	0	3.2e-05	3.2e-05	261
LEUabcpp_b3456	216	0.877167	1.2399	1	43	88	168	127	0.591549	0.413146	0.692488	1278	426	43	2	11	13	34	44	2	25	13	69	17	9	17	11	21	21	20	36	7	10	40.232	0.613	0	0	0	0	0	0	425	1	13	0.193553	0	2.13e-05	2.13e-05	261
IDONtex_b2215	64	0.0280042	1.90111	9	51	107	58	152	0.570652	0.377717	0.570652	1104	368	29	0	32	11	19	48	1	10	17	27	4	32	4	21	13	17	24	25	4	29	29.032	0.898	3	3	3	3	3	3	367	3	11	0.314667	0	4.27e-05	4.27e-05	261
FE2tpp_b3040	69	0.108139	0.729887	0	53	59	87	59	0.589147	0.437984	0.565891	774	258	34	1	4	8	11	30	4	21	6	42	15	7	15	5	4	18	9	17	2	4	45.75	0.495	0	0	0	0	0	0	257	22	10	0.313219	1.44e-06	0.000245	0.000245	91
G3PEtex_b2215	64	0.0280042	1.90111	9	51	107	58	152	0.570652	0.377717	0.570652	1104	368	29	0	32	11	19	48	1	10	17	27	4	32	4	21	13	17	24	25	4	29	29.032	0.898	3	3	3	3	3	3	367	2	11	0.314587	0	3.2e-05	3.2e-05	261
H2Stex_b1377	49	0.0274733	0.683685	1	68	140	60	110	0.550265	0.399471	0.449735	1134	378	42	0	37	12	19	43	5	9	17	27	9	33	5	14	11	21	24	17	5	27	40.354	0.74	3	3	3	3	3	3	377	2	1	1	0	3.2e-05	3.2e-05	172
CYTBDpp_b0978	99	0.524511	1.00879	0	78	104	189	144	0.56699	0.407767	0.646602	1545	515	52	1	13	21	34	40	10	28	11	67	26	13	23	30	22	25	29	33	18	18	47.171	0.601	1	1	1	1	1	1	514	3	11	0.24081	0	4.27e-05	4.27e-05	261
OXCDC_b2373	32	0.196484	1.03982	0	137	206	115	107	0.578761	0.426549	0.39292	1695	565	66	4	33	24	15	48	11	43	21	50	19	29	29	26	26	32	32	37	4	15	48.484	0.578	0	0	0	0	0	0	564	0	0	0	0	0	0	0
DMSOR1_b1587	28	0.0245439	0.39575	0	160	217	173	259	0.55377	0.435105	0.533993	2427	809	66	12	43	49	18	66	15	56	50	58	20	43	43	27	49	52	49	45	15	32	48.901	0.619	3	2	2	2	2	2	808	0	0	0	0	0	0	0
NI2uabcpp_b3480	13	0.241751	0.825007	0	54	43	77	95	0.657993	0.390335	0.639405	807	269	21	4	11	13	8	18	7	9	15	41	6	10	9	18	23	18	11	24	1	1	41.169	0.592	20	20	20	20	20	12	268	0	0	0	0	0	0	240
CYSSADS_b2810	35	0.144481	0.861957	0	70	104	126	102	0.664179	0.445274	0.567164	1206	402	57	4	23	19	16	29	10	12	11	45	9	12	20	22	19	24	20	33	6	10	45.356	0.618	1	1	1	1	1	1	401	0	0	0	0	0	0	0
ACBIPGT_b1993	287	0.352705	0.905836	4	35	57	62	28	0.631868	0.39011	0.494505	546	182	19	3	11	14	2	12	7	14	5	15	6	7	5	10	12	8	7	17	4	3	52.684	0.529	0	0	0	0	0	0	181	0	0	0	0	0	0	0
CHTBStex_b2215	64	0.0280042	1.90111	9	51	107	58	152	0.570652	0.377717	0.570652	1104	368	29	0	32	11	19	48	1	10	17	27	4	32	4	21	13	17	24	25	4	29	29.032	0.898	3	3	3	3	3	3	367	0	0	0	0	0	0	0
GUAD_b2883	127	0.04911	0.691078	0	86	115	111	128	0.556818	0.368182	0.543182	1320	440	29	4	26	32	18	31	15	19	25	47	15	16	16	16	23	23	28	26	8	22	47.431	0.62	0	0	0	0	0	0	439	0	0	0	0	0	0	168
Kt2pp_b1363	30	0.0775623	0.743873	2	117	212	98	59	0.419753	0.399177	0.323045	1458	486	27	10	16	9	46	42	10	46	14	63	14	13	13	7	17	44	31	36	10	17	53.264	0.425	1	1	1	1	1	1	485	2	10	0.311546	1.05e-06	3.2e-05	3.2e-05	302
23PDE9pp_b4213	95	0.0121502	0.840414	0	112	183	179	174	0.567901	0.371914	0.544753	1944	648	73	2	54	27	22	45	11	36	50	47	16	41	31	21	18	32	33	52	7	29	44.263	0.649	0	0	0	0	0	0	647	0	0	0	0	0	0	0
MALtex_b2215	64	0.0280042	1.90111	9	51	107	58	152	0.570652	0.377717	0.570652	1104	368	29	0	32	11	19	48	1	10	17	27	4	32	4	21	13	17	24	25	4	29	29.032	0.898	3	3	3	3	3	3	367	3	11	0.315234	0.00165627	4.27e-05	4.27e-05	261
MLTP2_b3417	83	0.193274	0.975522	0	120	200	274	204	0.615288	0.354637	0.598997	2394	798	80	7	53	44	31	49	24	43	54	82	14	42	30	47	41	25	31	54	20	26	42.166	0.715	1	1	1	1	1	1	797	1	1	1	0	2.13e-05	2.13e-05	216
GLYCLTt2rpp_b2975	123	0.282133	0.759379	5	93	122	189	157	0.538324	0.449198	0.616756	1683	561	68	2	11	8	42	57	5	52	18	65	19	9	30	18	8	41	35	50	11	11	48.593	0.591	1	1	1	1	1	1	560	3	12	0.239679	0.000831	4.27e-05	4.27e-05	261
GAMtex_b0241	57	0.045701	0.726706	0	70	118	72	92	0.502841	0.372159	0.465909	1056	352	31	0	31	14	21	37	1	14	25	23	9	27	3	17	12	21	24	16	3	22	46.295	0.669	3	3	3	3	3	3	351	0	0	0	0	0	0	0
LALALGLUtpp_b3496	42	0.251587	0.857971	0	67	104	162	157	0.532653	0.371429	0.65102	1470	490	45	5	12	10	43	43	7	34	16	69	25	16	23	13	10	24	25	45	7	17	50.178	0.589	1	1	1	1	1	1	489	0	0	0	0	0	0	0
GAMptspp_b1818	96	0.198948	1.09694	5	32	89	68	78	0.599251	0.400749	0.546816	801	267	40	2	8	6	10	25	4	32	3	27	13	14	8	9	5	10	15	28	2	5	38.328	0.759	0	0	0	0	0	0	266	0	0	0	0	0	0	0
LPLIPAL1E141pp_b0494	210	0.032285	0.623363	0	31	51	67	60	0.593301	0.382775	0.607656	627	209	22	0	12	7	11	10	4	7	8	29	7	11	14	17	11	11	6	10	6	5	46.887	0.587	0	0	0	0	0	0	208	3	12	0.138481	1.39e-05	4.27e-05	4.27e-05	198
RBP4E_b3583	29	0.165513	0.694051	0	36	43	71	82	0.642241	0.418103	0.659483	696	232	28	2	10	17	5	17	12	10	8	18	7	7	11	10	9	11	14	19	5	11	49.248	0.619	2	2	2	2	2	2	231	0	0	0	0	0	0	0
NTPP3_b2781	458	0.271171	0.613909	0	54	74	75	61	0.662879	0.344697	0.515152	792	264	27	3	21	32	11	10	4	13	12	24	8	7	7	17	21	7	12	18	4	5	43.609	0.653	0	0	0	0	0	0	263	0	0	0	0	0	0	255
G5SD_b0243	506	0.0964947	0.677026	0	78	103	114	123	0.648325	0.413876	0.566986	1254	418	54	7	29	24	5	31	7	27	19	43	9	17	12	18	25	22	21	38	1	8	44.962	0.67	0	0	0	0	0	0	417	3	10	0.303895	0	4.27e-05	4.27e-05	302
CMtex_b2215	64	0.0280042	1.90111	9	51	107	58	152	0.570652	0.377717	0.570652	1104	368	29	0	32	11	19	48	1	10	17	27	4	32	4	21	13	17	24	25	4	29	29.032	0.898	3	3	3	3	3	3	367	1	1	1	0	2.13e-05	2.13e-05	68
PGPP161_b1278	82	0.0324914	0.618938	0	72	65	75	43	0.588235	0.466667	0.462745	765	255	29	2	3	15	11	15	6	16	10	32	5	3	13	11	18	10	15	21	17	2	55.788	0.485	0	0	0	0	0	0	254	2	10	0.306787	0	3.2e-05	3.2e-05	306
FDH5pp_b1474	69	0.0935115	0.545956	0	139	237	323	317	0.563976	0.431102	0.629921	3048	1016	91	13	53	55	36	86	22	40	53	82	27	68	51	38	50	57	62	63	27	40	40.985	0.727	1	1	1	1	1	1	1014	1	11	0.228715	0	2.13e-05	2.13e-05	302
5DGLCNR_b4266	207	0.0795601	0.702309	7	56	74	55	70	0.603922	0.388235	0.490196	765	255	31	3	11	17	11	21	8	20	13	20	7	12	8	11	10	9	14	22	3	3	44.592	0.635	1	1	1	1	1	1	254	5	11	0.315153	0.000413	6.4e-05	6.4e-05	261
DUMPtex_b0929	44	1.53858	2.15677	0	56	129	52	126	0.556474	0.385675	0.490358	1089	363	34	0	27	14	19	49	1	14	19	23	5	32	5	13	12	16	22	26	2	29	37.082	0.832	3	3	3	3	3	3	362	0	0	0	0	0	0	0
2AGPGAT161_b2836	53	0.183582	0.630585	1	136	179	211	194	0.611111	0.405556	0.5625	2160	720	55	4	30	45	36	55	16	39	38	78	23	13	41	27	51	33	44	61	8	22	47.712	0.603	0	0	0	0	0	0	719	3	10	0.179909	0	4.27e-05	4.27e-05	198
PIuabcpp_b3725	566	0.0231773	0.95549	0	32	57	84	85	0.542636	0.372093	0.655039	774	258	19	4	15	16	12	16	4	18	16	27	8	12	10	14	13	14	17	11	2	9	37.701	0.742	1	1	1	1	1	1	257	0	0	0	0	0	0	275
SUCptspp_b2416	315	0.342568	1.34241	0	114	167	148	147	0.619792	0.357639	0.512153	1728	576	63	4	39	60	18	36	8	51	35	58	18	17	15	21	31	26	29	35	2	9	43.52	0.718	0	0	0	0	0	0	575	0	0	0	0	0	0	0
FUMtex_b2215	64	0.0280042	1.90111	9	51	107	58	152	0.570652	0.377717	0.570652	1104	368	29	0	32	11	19	48	1	10	17	27	4	32	4	21	13	17	24	25	4	29	29.032	0.898	3	3	3	3	3	3	367	0	0	0	0	0	0	0
PTRCabcpp_b0855	221	0.315128	0.977628	0	56	85	135	102	0.661376	0.367725	0.626984	1134	378	29	6	20	26	10	27	12	18	20	43	15	11	21	19	23	18	13	36	2	8	44.721	0.615	14	14	14	14	14	14	377	3	13	0.1955	9.35e-06	4.27e-05	4.27e-05	261
METS_b4019	293	0.445313	1.19229	0	181	247	377	423	0.625407	0.398208	0.651466	3684	1228	136	13	77	105	45	87	21	77	58	96	29	56	50	42	72	51	65	93	14	40	40.798	0.692	0	0	0	0	0	0	1227	162	10	0.37416	1.52e-05	0.00173963	0.00173963	91
LEUTAi_b3770	353	0.467189	0.700141	0	51	71	90	98	0.612903	0.429032	0.606452	930	310	28	3	16	22	13	30	8	20	12	21	8	10	13	10	18	20	15	25	6	11	41.187	0.738	0	0	0	0	0	0	309	164	10	0.374618	0.000251	0.00176098	0.00176098	91
TAURtex_b2215	64	0.0280042	1.90111	9	51	107	58	152	0.570652	0.377717	0.570652	1104	368	29	0	32	11	19	48	1	10	17	27	4	32	4	21	13	17	24	25	4	29	29.032	0.898	3	3	3	3	3	3	367	0	0	0	0	0	0	0
MDDCP5pp_b3182	70	0.0407299	0.377247	0	76	130	134	138	0.587866	0.437238	0.569038	1434	478	54	5	27	11	19	37	7	28	18	44	14	21	24	31	26	32	27	33	4	15	52.627	0.56	0	0	0	0	0	0	477	2	12	0.203117	3.75e-07	3.2e-05	3.2e-05	306
DCYTtex_b0411	49	0.0397702	1.70132	0	35	76	63	121	0.491525	0.4	0.623729	885	295	20	0	23	9	19	31	7	13	13	19	6	26	8	8	9	21	14	13	14	21	35.71	0.816	0	0	0	0	0	0	294	0	0	0	0	0	0	0
MDDCP1pp_b0839	177	0.0272172	0.857459	0	65	107	133	96	0.558603	0.421446	0.571072	1203	401	40	1	21	19	23	37	4	17	26	38	12	17	14	17	15	25	29	29	8	8	42.884	0.652	2	2	2	2	2	2	400	12	10	0.315072	2.25e-07	0.000139	0.000139	306
DAPtex_b2215	64	0.0280042	1.90111	9	51	107	58	152	0.570652	0.377717	0.570652	1104	368	29	0	32	11	19	48	1	10	17	27	4	32	4	21	13	17	24	25	4	29	29.032	0.898	3	3	3	3	3	3	367	6	11	0.315396	0.000255	7.47e-05	7.47e-05	261
MLTG3_b0403	60	0.0352794	0.304984	0	96	161	207	141	0.647934	0.414876	0.575207	1815	605	51	7	45	27	26	45	22	21	19	57	15	21	37	41	40	26	23	38	22	21	46.909	0.604	0	0	0	0	0	0	604	1	1	1	0	2.13e-05	2.13e-05	215
HYD2pp_b2996	46	0.187438	0.656275	0	47	73	106	103	0.580547	0.419453	0.635258	987	329	20	17	18	17	4	30	11	9	23	30	6	20	22	11	12	15	19	25	2	17	40.515	0.68	1	1	1	1	0	0	328	1	13	0.194414	0	2.13e-05	2.13e-05	261
MNLtex_b0929	44	1.53858	2.15677	0	56	129	52	126	0.556474	0.385675	0.490358	1089	363	34	0	27	14	19	49	1	14	19	23	5	32	5	13	12	16	22	26	2	29	37.082	0.832	3	3	3	3	3	3	362	0	0	0	0	0	0	0
LPLIPAL2E180_b3825	63	0.201587	0.617796	0	60	99	89	93	0.648094	0.431085	0.533724	1023	341	33	3	23	18	21	26	16	18	5	26	8	10	17	14	36	11	14	24	7	10	54.742	0.58	0	0	0	0	0	0	340	5	8	0.225723	0.00275602	6.4e-05	6.4e-05	198
FACOAE160_b0452	204	0.111435	0.81707	0	49	82	83	73	0.637631	0.393728	0.543554	861	287	22	1	12	19	16	21	12	12	10	31	5	11	20	16	16	20	10	21	3	8	48.274	0.628	0	0	0	0	0	0	286	2	10	0.311546	1.05e-06	3.2e-05	3.2e-05	302
NO3t7pp_b1223	121	0.43799	1.12253	0	62	122	151	129	0.534483	0.471983	0.603448	1392	464	53	5	12	7	45	48	3	31	14	51	16	10	20	16	17	40	25	32	11	7	46.631	0.659	1	1	1	1	1	1	463	0	0	0	0	0	0	0
PLIPA2A141pp_b3821	101	0.0282509	0.656571	0	38	73	92	87	0.524138	0.396552	0.617241	870	290	18	0	16	15	10	23	5	9	10	29	8	20	13	12	13	19	18	18	10	23	46.721	0.641	0	0	0	0	0	0	289	2	12	0.138246	0	3.2e-05	3.2e-05	198
BUTSO3abcpp_b0933	108	0.0580024	0.660756	0	60	55	102	39	0.6875	0.429688	0.550781	768	256	28	0	13	17	3	24	5	9	7	44	6	7	10	13	22	9	13	20	4	1	47.098	0.503	19	19	19	19	17	12	255	0	0	0	0	0	0	0
PPPNDO_b2538	65	0.0917986	0.757022	0	75	132	95	152	0.605727	0.438326	0.544053	1362	454	39	10	32	29	20	41	10	19	19	35	7	18	19	23	28	24	22	25	15	18	46.535	0.648	0	0	0	0	0	0	453	0	0	0	0	0	0	0
SLNTtex_b0929	44	1.53858	2.15677	0	56	129	52	126	0.556474	0.385675	0.490358	1089	363	34	0	27	14	19	49	1	14	19	23	5	32	5	13	12	16	22	26	2	29	37.082	0.832	3	3	3	3	3	3	362	0	0	0	0	0	0	0
GLYALDtex_b0241	57	0.045701	0.726706	0	70	118	72	92	0.502841	0.372159	0.465909	1056	352	31	0	31	14	21	37	1	14	25	23	9	27	3	17	12	21	24	16	3	22	46.295	0.669	3	3	3	3	3	3	351	5	11	0.31491	1.28e-06	6.4e-05	6.4e-05	261
PTRCtex_b2215	64	0.0280042	1.90111	9	51	107	58	152	0.570652	0.377717	0.570652	1104	368	29	0	32	11	19	48	1	10	17	27	4	32	4	21	13	17	24	25	4	29	29.032	0.898	3	3	3	3	3	3	367	3	11	0.315234	0.000896	4.27e-05	4.27e-05	261
ARGSL_b3960	545	0.66187	1.49675	5	75	98	172	113	0.674672	0.39738	0.622271	1374	458	54	7	33	30	14	32	9	14	21	59	10	11	13	33	26	25	18	33	7	8	41.145	0.672	0	0	0	0	0	0	457	161	10	0.326754	0.000174	0.00172896	0.00172896	91
FE3tex_b0241	57	0.045701	0.726706	0	70	118	72	92	0.502841	0.372159	0.465909	1056	352	31	0	31	14	21	37	1	14	25	23	9	27	3	17	12	21	24	16	3	22	46.295	0.669	3	3	3	3	3	3	351	0	0	0	0	0	0	118
TRPtex_b0241	57	0.045701	0.726706	0	70	118	72	92	0.502841	0.372159	0.465909	1056	352	31	0	31	14	21	37	1	14	25	23	9	27	3	17	12	21	24	16	3	22	46.295	0.669	3	3	3	3	3	3	351	3	11	0.314667	0	4.27e-05	4.27e-05	261
RIBtex_b2215	64	0.0280042	1.90111	9	51	107	58	152	0.570652	0.377717	0.570652	1104	368	29	0	32	11	19	48	1	10	17	27	4	32	4	21	13	17	24	25	4	29	29.032	0.898	3	3	3	3	3	3	367	0	0	0	0	0	0	0
HISabcpp_b2308	71	0.00585743	0.723383	0	26	62	79	62	0.558952	0.401747	0.615721	687	229	19	1	5	8	15	27	1	20	6	30	8	5	6	7	10	11	15	23	2	9	52.261	0.58	0	0	0	0	0	0	228	1	13	0.19337	0	2.13e-05	2.13e-05	261
GPDDA1pp_b2239	68	0.0508723	0.964293	0	65	114	116	64	0.554318	0.311978	0.501393	1077	359	26	1	31	23	14	24	10	17	32	29	15	17	16	16	10	12	19	22	4	20	47.602	0.648	0	0	0	0	0	0	358	0	0	0	0	0	0	0
PLIPA1E180pp_b3821	101	0.0282509	0.656571	0	38	73	92	87	0.524138	0.396552	0.617241	870	290	18	0	16	15	10	23	5	9	10	29	8	20	13	12	13	19	18	18	10	23	46.721	0.641	0	0	0	0	0	0	289	5	8	0.220086	0.000611	6.4e-05	6.4e-05	198
CBItonex_b3966	75	0.388639	0.749811	0	88	211	146	170	0.549593	0.443902	0.513821	1845	615	41	1	49	18	18	63	11	25	21	45	3	28	18	34	31	48	56	41	14	49	48.859	0.611	2	1	1	1	0	0	614	0	0	0	0	0	0	0
23CCMPtex_b0241	57	0.045701	0.726706	0	70	118	72	92	0.502841	0.372159	0.465909	1056	352	31	0	31	14	21	37	1	14	25	23	9	27	3	17	12	21	24	16	3	22	46.295	0.669	3	3	3	3	3	3	351	0	0	0	0	0	0	0
G3PItex_b0929	44	1.53858	2.15677	0	56	129	52	126	0.556474	0.385675	0.490358	1089	363	34	0	27	14	19	49	1	14	19	23	5	32	5	13	12	16	22	26	2	29	37.082	0.832	3	3	3	3	3	3	362	0	0	0	0	0	0	0
FUSAtex_b0929	44	1.53858	2.15677	0	56	129	52	126	0.556474	0.385675	0.490358	1089	363	34	0	27	14	19	49	1	14	19	23	5	32	5	13	12	16	22	26	2	29	37.082	0.832	3	3	3	3	3	3	362	1	1	1	0	2.13e-05	2.13e-05	125
4HOXPACDtex_b1377	49	0.0274733	0.683685	1	68	140	60	110	0.550265	0.399471	0.449735	1134	378	42	0	37	12	19	43	5	9	17	27	9	33	5	14	11	21	24	17	5	27	40.354	0.74	3	3	3	3	3	3	377	0	0	0	0	0	0	0
LYXt2pp_b3907	46	0.185124	0.909955	0	45	79	116	105	0.492754	0.417391	0.64058	1035	345	35	5	5	7	18	39	5	34	15	41	19	14	10	3	9	22	12	27	12	12	48.933	0.594	0	0	0	0	0	0	344	0	0	0	0	0	0	0
CYNTt2pp_b0341	38	0.037057	1.07442	0	47	86	154	98	0.628571	0.477922	0.654545	1155	385	48	4	3	6	15	38	7	20	5	68	17	3	20	18	17	25	15	32	16	7	52.887	0.567	0	0	0	0	0	0	384	0	0	0	0	0	0	0
NTD9pp_b0480	71	0.26015	0.883051	0	100	142	176	133	0.597096	0.368421	0.560799	1653	551	48	2	38	35	19	50	10	28	41	44	16	27	26	28	20	21	29	40	7	21	41.884	0.666	0	0	0	0	0	0	550	0	0	0	0	0	0	0
TTRCYCtex_b0929	44	1.53858	2.15677	0	56	129	52	126	0.556474	0.385675	0.490358	1089	363	34	0	27	14	19	49	1	14	19	23	5	32	5	13	12	16	22	26	2	29	37.082	0.832	3	3	3	3	3	3	362	1	1	1	0	2.13e-05	2.13e-05	326
FRULYStex_b0241	57	0.045701	0.726706	0	70	118	72	92	0.502841	0.372159	0.465909	1056	352	31	0	31	14	21	37	1	14	25	23	9	27	3	17	12	21	24	16	3	22	46.295	0.669	3	3	3	3	3	3	351	0	0	0	0	0	0	0
PPM2_b4383	203	0.597501	0.820681	0	64	106	92	146	0.627451	0.419118	0.583333	1224	408	37	6	31	29	20	46	15	22	22	35	9	14	17	7	17	17	25	22	5	11	35.893	0.806	0	0	0	0	0	0	407	2	10	0.295965	0	3.2e-05	3.2e-05	302
PUNP6_b4384	173	0.156214	1.07229	0	38	61	46	95	0.591667	0.391667	0.5875	720	240	26	4	19	14	12	23	6	18	14	15	12	7	6	2	12	9	14	20	0	6	35.287	0.824	0	0	0	0	0	0	239	4	12	0.197932	0.000831	5.34e-05	5.34e-05	30
GLUDy_b1761	257	0.937686	1.66016	13	82	122	109	135	0.638393	0.415179	0.544643	1344	448	47	4	19	31	22	49	10	17	22	35	18	17	15	23	22	22	22	37	5	10	43.811	0.689	0	0	0	0	0	0	447	0	0	0	0	0	0	144
GALTtex_b2215	64	0.0280042	1.90111	9	51	107	58	152	0.570652	0.377717	0.570652	1104	368	29	0	32	11	19	48	1	10	17	27	4	32	4	21	13	17	24	25	4	29	29.032	0.898	3	3	3	3	3	3	367	0	0	0	0	0	0	0
FBA_b2097	110	0.074449	1.53093	4	53	106	91	101	0.581197	0.407407	0.547009	1053	351	41	4	22	14	8	30	8	20	15	32	10	22	10	12	18	20	18	25	1	20	49.044	0.631	0	0	0	0	0	0	350	0	0	0	0	0	0	109
THRPtex_b1377	49	0.0274733	0.683685	1	68	140	60	110	0.550265	0.399471	0.449735	1134	378	42	0	37	12	19	43	5	9	17	27	9	33	5	14	11	21	24	17	5	27	40.354	0.74	3	3	3	3	3	3	377	0	0	0	0	0	0	0
HACD8_b3846	59	0.0262198	1.63496	4	132	143	208	247	0.643836	0.389041	0.623288	2190	730	82	5	44	50	30	62	11	37	54	74	21	24	40	24	31	26	30	58	8	18	39.202	0.724	1	1	1	1	1	1	729	2	1	1	0	3.2e-05	3.2e-05	175
FRUtex_b2215	64	0.0280042	1.90111	9	51	107	58	152	0.570652	0.377717	0.570652	1104	368	29	0	32	11	19	48	1	10	17	27	4	32	4	21	13	17	24	25	4	29	29.032	0.898	3	3	3	3	3	3	367	0	0	0	0	0	0	0
O16A4Lpp_b3622	45	0.106459	0.752614	0	144	170	51	55	0.361905	0.342857	0.252381	1260	420	32	4	6	12	27	19	7	56	20	64	8	29	9	4	14	41	23	20	2	22	51.84	0.362	0	0	0	0	0	0	419	0	0	0	0	0	0	0
PHEMEabcpp_b2198	72	0.0298423	0.557345	0	10	19	29	12	0.685714	0.442857	0.585714	210	70	13	0	0	3	5	3	2	2	0	5	4	1	2	6	6	2	2	10	2	1	42.053	0.645	0	0	0	0	0	0	69	18	11	0.317029	1.02e-05	0.000203	0.000203	261
LALADGLUtex_b2215	64	0.0280042	1.90111	9	51	107	58	152	0.570652	0.377717	0.570652	1104	368	29	0	32	11	19	48	1	10	17	27	4	32	4	21	13	17	24	25	4	29	29.032	0.898	3	3	3	3	3	3	367	0	0	0	0	0	0	0
LALADGLUtex_b0241	57	0.045701	0.726706	0	70	118	72	92	0.502841	0.372159	0.465909	1056	352	31	0	31	14	21	37	1	14	25	23	9	27	3	17	12	21	24	16	3	22	46.295	0.669	3	3	3	3	3	3	351	0	0	0	0	0	0	0
TRPS2_b1261	586	0.438094	1.3802	5	63	98	113	124	0.623116	0.422111	0.595477	1194	398	41	5	17	30	13	43	14	23	18	39	15	14	18	16	18	18	23	19	1	12	44.249	0.672	0	0	0	0	0	0	397	0	0	0	0	0	0	324
GLYtex_b0241	57	0.045701	0.726706	0	70	118	72	92	0.502841	0.372159	0.465909	1056	352	31	0	31	14	21	37	1	14	25	23	9	27	3	17	12	21	24	16	3	22	46.295	0.669	3	3	3	3	3	3	351	3	11	0.315234	0.00122116	4.27e-05	4.27e-05	261
GMHEPK_b3052	316	0.0899545	0.851796	0	85	106	160	127	0.656904	0.414226	0.600418	1434	478	51	4	25	36	12	43	5	23	26	49	11	18	22	15	25	25	25	51	3	8	43.414	0.666	0	0	0	0	0	0	477	84	10	0.320597	0.000154	0.000907	0.000907	306
MINCYCtpp_b3035	76	0.232213	0.78678	0	80	129	139	146	0.554656	0.408907	0.576923	1482	494	57	0	25	20	10	24	3	21	18	53	6	43	17	44	22	44	36	28	1	21	45.516	0.658	0	0	0	0	0	0	493	1	1	1	0	2.13e-05	2.13e-05	210
PRAIS_b2499	570	0.103531	0.694507	0	64	91	88	103	0.630058	0.404624	0.552023	1038	346	28	7	25	22	7	39	8	21	18	33	7	11	14	8	11	20	16	36	5	9	43.092	0.686	0	0	0	0	0	0	345	167	10	0.330189	0.000194	0.00179299	0.00179299	91
GTHRDtex_b1377	49	0.0274733	0.683685	1	68	140	60	110	0.550265	0.399471	0.449735	1134	378	42	0	37	12	19	43	5	9	17	27	9	33	5	14	11	21	24	17	5	27	40.354	0.74	3	3	3	3	3	3	377	20	11	0.318017	0.000874	0.000224	0.000224	261
GLNtex_b0929	44	1.53858	2.15677	0	56	129	52	126	0.556474	0.385675	0.490358	1089	363	34	0	27	14	19	49	1	14	19	23	5	32	5	13	12	16	22	26	2	29	37.082	0.832	3	3	3	3	3	3	362	0	0	0	0	0	0	0
PSERtex_b1377	49	0.0274733	0.683685	1	68	140	60	110	0.550265	0.399471	0.449735	1134	378	42	0	37	12	19	43	5	9	17	27	9	33	5	14	11	21	24	17	5	27	40.354	0.74	3	3	3	3	3	3	377	0	0	0	0	0	0	0
DIMPtex_b1377	49	0.0274733	0.683685	1	68	140	60	110	0.550265	0.399471	0.449735	1134	378	42	0	37	12	19	43	5	9	17	27	9	33	5	14	11	21	24	17	5	27	40.354	0.74	3	3	3	3	3	3	377	0	0	0	0	0	0	0
MN2tpp_b3040	69	0.108139	0.729887	0	53	59	87	59	0.589147	0.437984	0.565891	774	258	34	1	4	8	11	30	4	21	6	42	15	7	15	5	4	18	9	17	2	4	45.75	0.495	0	0	0	0	0	0	257	22	10	0.313219	1.44e-06	0.000245	0.000245	91
ECOAH7_b2341	124	0.0138785	1.06552	4	141	202	204	168	0.61958	0.427972	0.52028	2145	715	75	9	30	44	24	69	13	52	40	68	16	20	38	35	44	32	37	53	2	13	52.384	0.575	4	4	4	4	4	2	714	2	1	1	0	3.2e-05	3.2e-05	96
CSNtex_b0929	44	1.53858	2.15677	0	56	129	52	126	0.556474	0.385675	0.490358	1089	363	34	0	27	14	19	49	1	14	19	23	5	32	5	13	12	16	22	26	2	29	37.082	0.832	3	3	3	3	3	3	362	0	0	0	0	0	0	0
LA4NTpp_b2257	57	0.111933	0.65405	0	99	143	161	148	0.53902	0.430127	0.560799	1653	551	54	7	18	16	35	38	8	38	19	73	13	15	28	18	25	28	28	37	28	24	50.156	0.563	0	0	0	0	0	0	550	64	11	0.334334	0.000232	0.000694	0.000694	306
G3PCabcpp_b3452	98	0.320767	0.936113	5	27	50	100	119	0.537162	0.398649	0.739865	888	296	29	0	9	6	33	15	3	19	5	35	4	6	14	12	12	25	15	31	7	15	42.306	0.638	1	0	0	0	0	0	295	0	0	0	0	0	0	0
O16AP2pp_b2027	79	0.0719922	0.874116	1	70	97	108	52	0.562691	0.324159	0.489297	981	327	29	0	19	20	4	17	3	27	19	37	8	18	11	31	15	15	17	23	2	11	48.623	0.559	0	0	0	0	0	0	326	0	0	0	0	0	0	0
GLYBabcpp_b2131	75	0.0570224	0.795661	0	65	64	99	78	0.620915	0.421569	0.578431	918	306	43	0	15	15	8	24	2	11	22	36	4	11	16	20	6	16	18	23	6	9	49.918	0.582	0	0	0	0	0	0	305	0	0	0	0	0	0	0
MDDCP5pp_b0839	177	0.0272172	0.857459	0	65	107	133	96	0.558603	0.421446	0.571072	1203	401	40	1	21	19	23	37	4	17	26	38	12	17	14	17	15	25	29	29	8	8	42.884	0.652	2	2	2	2	2	2	400	2	12	0.203117	3.75e-07	3.2e-05	3.2e-05	306
GSPMDA_b2988	66	0.380889	0.932586	0	92	149	192	187	0.596774	0.366129	0.61129	1860	620	41	9	42	47	25	48	19	38	31	62	11	25	27	30	30	24	31	39	17	23	42.346	0.692	0	0	0	0	0	0	619	1	1	1	0	2.13e-05	2.13e-05	164
UDPGLCURtex_b2215	64	0.0280042	1.90111	9	51	107	58	152	0.570652	0.377717	0.570652	1104	368	29	0	32	11	19	48	1	10	17	27	4	32	4	21	13	17	24	25	4	29	29.032	0.898	3	3	3	3	3	3	367	0	0	0	0	0	0	0
GTHOXtex_b0241	57	0.045701	0.726706	0	70	118	72	92	0.502841	0.372159	0.465909	1056	352	31	0	31	14	21	37	1	14	25	23	9	27	3	17	12	21	24	16	3	22	46.295	0.669	3	3	3	3	3	3	351	0	0	0	0	0	0	0
RNTR2c2_b4237	102	0.0813683	1.15931	1	23	41	37	54	0.574194	0.367742	0.587097	465	155	4	5	12	4	3	12	5	10	8	13	3	10	9	10	8	8	6	15	4	5	45.111	0.658	0	0	0	0	0	0	154	1	10	0.295894	0	2.13e-05	2.13e-05	302
DCYTD_b2143	137	0.202374	0.697183	0	48	82	93	72	0.623729	0.457627	0.559322	885	295	47	5	17	13	11	20	9	13	10	39	6	11	16	13	11	19	14	8	3	9	47.942	0.625	0	0	0	0	0	0	294	1	1	1	0	2.13e-05	2.13e-05	89
PTRCt2pp_b0692	34	0.236651	1.01713	1	68	118	139	115	0.502273	0.438636	0.577273	1320	440	46	6	4	12	23	43	3	38	15	39	21	20	18	11	5	40	25	46	10	14	43.166	0.641	0	0	0	0	0	0	439	1	13	0.19386	0	2.13e-05	2.13e-05	261
DDGLK_b3526	75	0.212709	0.857065	0	44	59	102	105	0.612903	0.432258	0.667742	930	310	34	5	19	24	8	23	4	16	14	29	6	9	9	12	17	21	20	22	5	12	38.654	0.702	0	0	0	0	0	0	309	0	0	0	0	0	0	0
ADPRDP_b3034	89	0.276943	0.965746	0	50	55	60	45	0.647619	0.37619	0.5	630	210	19	0	11	24	8	13	7	14	6	19	5	6	7	7	16	12	8	19	4	4	54.469	0.542	0	0	0	0	0	0	209	5	11	0.246677	0	6.4e-05	6.4e-05	241
INDOLEt2pp_b3035	76	0.232213	0.78678	0	80	129	139	146	0.554656	0.408907	0.576923	1482	494	57	0	25	20	10	24	3	21	18	53	6	43	17	44	22	44	36	28	1	21	45.516	0.658	0	0	0	0	0	0	493	0	0	0	0	0	0	186
RNDR4b_b2675	103	0.342172	0.9737	0	118	183	196	218	0.566434	0.40979	0.579021	2145	715	70	7	38	43	33	46	18	42	25	67	18	33	22	33	47	45	50	34	6	37	48.5	0.628	0	0	0	0	0	0	714	3	12	0.210012	1.53e-05	4.27e-05	4.27e-05	261
FUM_b1612	115	0.271868	0.740517	0	104	146	159	140	0.606557	0.395264	0.544627	1647	549	52	9	29	38	16	51	12	31	38	51	11	21	27	29	23	25	27	29	3	26	45.211	0.664	1	1	1	1	1	1	548	0	0	0	0	0	0	124
HACD8_b2341	124	0.0138785	1.06552	4	141	202	204	168	0.61958	0.427972	0.52028	2145	715	75	9	30	44	24	69	13	52	40	68	16	20	38	35	44	32	37	53	2	13	52.384	0.575	4	4	4	4	4	2	714	2	1	1	0	3.2e-05	3.2e-05	175
CHTBStex_b0241	57	0.045701	0.726706	0	70	118	72	92	0.502841	0.372159	0.465909	1056	352	31	0	31	14	21	37	1	14	25	23	9	27	3	17	12	21	24	16	3	22	46.295	0.669	3	3	3	3	3	3	351	0	0	0	0	0	0	0
LPLIPAL2E141_b3825	63	0.201587	0.617796	0	60	99	89	93	0.648094	0.431085	0.533724	1023	341	33	3	23	18	21	26	16	18	5	26	8	10	17	14	36	11	14	24	7	10	54.742	0.58	0	0	0	0	0	0	340	5	10	0.189131	0.019714	6.4e-05	6.4e-05	198
ASNS2_b3744	107	0.1005	0.978257	0	52	79	117	83	0.688822	0.401813	0.60423	993	331	27	2	24	23	10	29	13	14	15	40	6	3	14	20	19	22	12	24	8	5	41.13	0.681	0	0	0	0	0	0	330	2	10	0.311546	1.05e-06	3.2e-05	3.2e-05	302
ECOAH8_b2341	124	0.0138785	1.06552	4	141	202	204	168	0.61958	0.427972	0.52028	2145	715	75	9	30	44	24	69	13	52	40	68	16	20	38	35	44	32	37	53	2	13	52.384	0.575	4	4	4	4	4	2	714	2	1	1	0	3.2e-05	3.2e-05	175
THZPSN3_b3992	75	1.02937	1.26466	5	46	50	82	74	0.662698	0.444444	0.619048	756	252	24	7	20	9	4	23	1	11	5	35	5	9	12	19	16	12	15	18	3	3	52.335	0.551	1	1	1	1	1	1	251	336	9	0.424022	0.000798	0.00359666	0.00359666	91
ARBtex_b2215	64	0.0280042	1.90111	9	51	107	58	152	0.570652	0.377717	0.570652	1104	368	29	0	32	11	19	48	1	10	17	27	4	32	4	21	13	17	24	25	4	29	29.032	0.898	3	3	3	3	3	3	367	0	0	0	0	0	0	0
FLVR_b2764	146	0.545857	2.14267	8	108	128	174	190	0.661667	0.413333	0.606667	1800	600	71	2	36	49	22	36	9	21	26	61	8	23	32	28	34	31	31	51	11	17	43.616	0.656	0	0	0	0	0	0	599	1	11	0.314506	0	2.13e-05	2.13e-05	261
CTECOAI7_b3846	59	0.0262198	1.63496	4	132	143	208	247	0.643836	0.389041	0.623288	2190	730	82	5	44	50	30	62	11	37	54	74	21	24	40	24	31	26	30	58	8	18	39.202	0.724	1	1	1	1	1	1	729	0	0	0	0	0	0	76
DDGLCNtex_b2215	64	0.0280042	1.90111	9	51	107	58	152	0.570652	0.377717	0.570652	1104	368	29	0	32	11	19	48	1	10	17	27	4	32	4	21	13	17	24	25	4	29	29.032	0.898	3	3	3	3	3	3	367	0	0	0	0	0	0	0
Kt3pp_b0047	134	0.0997227	1.35266	0	98	130	248	145	0.63124	0.400966	0.63285	1863	621	70	4	21	44	30	52	11	42	17	95	26	11	20	21	38	32	26	45	7	8	43.165	0.601	1	1	1	1	1	1	620	0	0	0	0	0	0	191
ADA_b1623	68	0.162598	0.773423	0	59	101	73	101	0.679641	0.416168	0.520958	1002	334	42	4	17	27	12	26	14	26	8	35	6	8	12	17	21	15	16	20	3	4	46.883	0.63	0	0	0	0	0	0	333	0	0	0	0	0	0	23
MELIBt2pp_b4120	36	0.0064081	0.803928	4	77	163	120	114	0.510549	0.371308	0.493671	1422	474	38	4	17	9	34	36	7	41	13	58	17	14	17	11	17	28	27	51	8	26	53.794	0.559	0	0	0	0	0	0	473	1	1	1	0	2.13e-05	2.13e-05	205
CLPNS140pp_b0789	74	0.216763	0.648401	0	74	93	128	119	0.649758	0.386473	0.596618	1242	414	37	2	22	30	17	26	15	22	16	42	9	18	21	19	38	12	14	30	9	14	45.21	0.594	0	0	0	0	0	0	413	1	1	1	0	2.13e-05	2.13e-05	65
GGPTRCO_b1301	130	0.477343	1.01529	1	48	84	121	174	0.629977	0.42623	0.690867	1281	427	37	7	26	24	12	43	9	19	15	45	10	17	15	12	32	21	25	29	2	26	38.327	0.68	0	0	0	0	0	0	426	3	1	1	0	4.27e-05	4.27e-05	137
NTPP4_b1759	229	0.0503491	0.485034	0	31	34	41	30	0.713235	0.411765	0.522059	408	136	20	1	6	15	3	8	7	8	3	14	3	0	8	9	9	5	2	9	3	2	57.227	0.539	1	0	0	0	0	0	135	0	0	0	0	0	0	256
ACGALtex_b0241	57	0.045701	0.726706	0	70	118	72	92	0.502841	0.372159	0.465909	1056	352	31	0	31	14	21	37	1	14	25	23	9	27	3	17	12	21	24	16	3	22	46.295	0.669	3	3	3	3	3	3	351	0	0	0	0	0	0	0
MNtex_b0929	44	1.53858	2.15677	0	56	129	52	126	0.556474	0.385675	0.490358	1089	363	34	0	27	14	19	49	1	14	19	23	5	32	5	13	12	16	22	26	2	29	37.082	0.832	3	3	3	3	3	3	362	336	9	0.424022	0.000798	0.00359666	0.00359666	91
RNTR4c2_b4238	108	0.0513211	0.838836	0	97	172	199	245	0.593268	0.389902	0.622721	2139	713	58	16	41	52	27	56	19	43	42	53	12	40	30	27	45	31	36	46	6	32	37.812	0.746	0	0	0	0	0	0	712	4	10	0.316865	7.84e-06	5.34e-05	5.34e-05	306
26DAHtex_b1377	49	0.0274733	0.683685	1	68	140	60	110	0.550265	0.399471	0.449735	1134	378	42	0	37	12	19	43	5	9	17	27	9	33	5	14	11	21	24	17	5	27	40.354	0.74	3	3	3	3	3	3	377	0	0	0	0	0	0	0
NTD7pp_b4055	74	0.14684	0.511661	0	47	74	53	64	0.542017	0.44958	0.491597	714	238	23	1	14	11	13	15	3	16	12	14	5	15	16	8	13	20	13	16	5	4	52.306	0.599	0	0	0	0	0	0	237	0	0	0	0	0	0	0
ALLTNtex_b0241	57	0.045701	0.726706	0	70	118	72	92	0.502841	0.372159	0.465909	1056	352	31	0	31	14	21	37	1	14	25	23	9	27	3	17	12	21	24	16	3	22	46.295	0.669	3	3	3	3	3	3	351	5	11	0.315315	0.000169	6.4e-05	6.4e-05	261
HACD4_b2341	124	0.0138785	1.06552	4	141	202	204	168	0.61958	0.427972	0.52028	2145	715	75	9	30	44	24	69	13	52	40	68	16	20	38	35	44	32	37	53	2	13	52.384	0.575	4	4	4	4	4	2	714	3	1	1	0	4.27e-05	4.27e-05	18
3PEPTtex_b2215	64	0.0280042	1.90111	9	51	107	58	152	0.570652	0.377717	0.570652	1104	368	29	0	32	11	19	48	1	10	17	27	4	32	4	21	13	17	24	25	4	29	29.032	0.898	3	3	3	3	3	3	367	13	11	0.32186	3.28e-05	0.000149	0.000149	306
O16GALFT_b2034	47	0.0176317	0.684418	0	93	143	44	51	0.465257	0.326284	0.287009	993	331	13	5	29	15	21	21	7	29	24	28	9	16	10	9	15	27	13	21	4	14	50.311	0.438	0	0	0	0	0	0	330	0	0	0	0	0	0	0
HG2tex_b1377	49	0.0274733	0.683685	1	68	140	60	110	0.550265	0.399471	0.449735	1134	378	42	0	37	12	19	43	5	9	17	27	9	33	5	14	11	21	24	17	5	27	40.354	0.74	3	3	3	3	3	3	377	0	0	0	0	0	0	0
CYStpp_b1533	94	0.00080625	0.619208	0	55	78	111	56	0.54	0.396667	0.556667	900	300	33	2	5	4	23	27	5	22	8	51	14	8	11	6	10	16	14	29	6	5	48.521	0.526	0	0	0	0	0	0	299	0	0	0	0	0	0	81
GLCURtex_b1377	49	0.0274733	0.683685	1	68	140	60	110	0.550265	0.399471	0.449735	1134	378	42	0	37	12	19	43	5	9	17	27	9	33	5	14	11	21	24	17	5	27	40.354	0.74	3	3	3	3	3	3	377	0	0	0	0	0	0	0
HPPPNtex_b0929	44	1.53858	2.15677	0	56	129	52	126	0.556474	0.385675	0.490358	1089	363	34	0	27	14	19	49	1	14	19	23	5	32	5	13	12	16	22	26	2	29	37.082	0.832	3	3	3	3	3	3	362	0	0	0	0	0	0	0
XAND_b2867	41	0.253874	0.780988	0	54	85	68	86	0.627986	0.457338	0.525597	879	293	41	5	15	13	11	19	16	21	9	28	4	12	15	13	16	17	19	12	1	5	46.903	0.599	0	0	0	0	0	0	292	0	0	0	0	0	0	179
CDAPPA120_b3918	68	0.177121	0.562483	0	51	79	77	45	0.575397	0.400794	0.484127	756	252	18	4	9	16	7	14	6	12	9	31	8	15	16	14	19	15	11	16	4	7	47.779	0.536	0	0	0	0	0	0	251	1	14	0.108196	0	2.13e-05	2.13e-05	198
GLYtex_b1377	49	0.0274733	0.683685	1	68	140	60	110	0.550265	0.399471	0.449735	1134	378	42	0	37	12	19	43	5	9	17	27	9	33	5	14	11	21	24	17	5	27	40.354	0.74	3	3	3	3	3	3	377	3	11	0.315234	0.00122116	4.27e-05	4.27e-05	261
CYNTtex_b0929	44	1.53858	2.15677	0	56	129	52	126	0.556474	0.385675	0.490358	1089	363	34	0	27	14	19	49	1	14	19	23	5	32	5	13	12	16	22	26	2	29	37.082	0.832	3	3	3	3	3	3	362	0	0	0	0	0	0	0
XAND_b2866	60	0.140289	0.828865	0	150	204	177	222	0.613546	0.446215	0.52988	2259	753	86	11	39	41	19	60	22	46	27	61	22	27	40	29	39	44	47	62	8	22	50.487	0.595	0	0	0	0	0	0	752	0	0	0	0	0	0	179
PYDXtex_b1377	49	0.0274733	0.683685	1	68	140	60	110	0.550265	0.399471	0.449735	1134	378	42	0	37	12	19	43	5	9	17	27	9	33	5	14	11	21	24	17	5	27	40.354	0.74	3	3	3	3	3	3	377	0	0	0	0	0	0	0
N2Otex_b0929	44	1.53858	2.15677	0	56	129	52	126	0.556474	0.385675	0.490358	1089	363	34	0	27	14	19	49	1	14	19	23	5	32	5	13	12	16	22	26	2	29	37.082	0.832	3	3	3	3	3	3	362	0	0	0	0	0	0	0
2AGPA141tipp_b2835	60	0.122308	0.614945	0	50	93	149	106	0.580402	0.444724	0.640704	1194	398	57	4	4	9	20	43	4	26	12	57	14	16	14	10	10	22	18	38	9	10	50.482	0.583	0	0	0	0	0	0	397	3	12	0.138262	0	4.27e-05	4.27e-05	198
INDOLEtex_b0241	57	0.045701	0.726706	0	70	118	72	92	0.502841	0.372159	0.465909	1056	352	31	0	31	14	21	37	1	14	25	23	9	27	3	17	12	21	24	16	3	22	46.295	0.669	3	3	3	3	3	3	351	1	1	1	0	2.13e-05	2.13e-05	188
MOCDS_b2877	24	0.0986163	0.785593	0	56	56	35	46	0.487047	0.388601	0.419689	579	193	14	4	11	9	4	11	7	23	6	18	8	10	10	9	9	10	14	7	3	5	51.516	0.46	0	0	0	0	0	0	192	350	9	0.427127	0.00299896	0.00374608	0.00374608	306
NADH18pp_b2278	438	0.24606	0.910616	0	60	113	227	214	0.592834	0.403909	0.718241	1842	614	69	3	14	15	38	59	15	33	15	99	29	20	18	11	16	33	33	58	16	19	37.379	0.707	0	0	0	0	0	0	613	1	15	0.140369	0	2.13e-05	2.13e-05	261
O16AP2pp_b2035	35	0.0578444	1.03782	0	99	163	70	57	0.33419	0.308483	0.326478	1167	389	18	7	8	8	37	15	6	44	16	47	14	17	6	10	9	37	22	35	5	27	49.109	0.428	0	0	0	0	0	0	388	0	0	0	0	0	0	0
TARTt2_3pp_b4123	82	0.0966133	0.659513	0	58	116	141	132	0.561521	0.395973	0.610738	1341	447	48	5	15	12	23	38	6	50	16	53	16	10	22	10	12	27	19	43	6	15	42.419	0.685	1	1	1	1	1	1	446	0	0	0	0	0	0	0
MCITS_b0333	216	0.128157	0.75964	6	55	80	119	136	0.607692	0.407692	0.653846	1170	390	35	3	20	26	10	29	18	24	23	35	11	13	19	11	20	27	21	26	5	13	40.13	0.687	0	0	0	0	0	0	389	3	1	1	0	4.27e-05	4.27e-05	209
MDDEP1pp_b2134	92	0.243299	0.987889	3	57	80	104	70	0.530547	0.430868	0.559486	933	311	41	1	12	8	10	12	7	13	21	31	15	18	16	10	15	23	24	22	2	9	41.618	0.65	0	0	0	0	0	0	310	0	0	0	0	0	0	200
FRD2_b4153	79	0.235623	1.04206	1	33	50	72	90	0.534694	0.412245	0.661224	735	245	24	11	14	13	9	14	6	14	14	17	9	13	14	9	10	14	12	14	2	11	38.352	0.776	1	1	1	1	1	1	244	0	0	0	0	0	0	121
DSBCGT_b2893	118	0.106192	0.642038	0	44	65	66	62	0.548523	0.362869	0.540084	711	237	25	4	17	9	8	18	6	12	22	19	12	7	11	12	2	11	14	18	1	8	47.717	0.674	0	0	0	0	0	0	236	0	0	0	0	0	0	0
34dhpactex_b2215	64	0.0280042	1.90111	9	51	107	58	152	0.570652	0.377717	0.570652	1104	368	29	0	32	11	19	48	1	10	17	27	4	32	4	21	13	17	24	25	4	29	29.032	0.898	3	3	3	3	3	3	367	0	0	0	0	0	0	0
FORtppi_b0904	106	0.155266	1.34757	0	44	83	71	88	0.520979	0.391608	0.555944	858	286	29	5	8	8	19	26	8	21	10	33	14	13	9	3	4	13	19	28	7	8	48.495	0.629	1	1	1	1	1	1	285	6	10	0.296467	0.00249052	7.47e-05	7.47e-05	302
TRPS1_b1260	238	0.521664	1.28924	4	51	69	77	72	0.635688	0.416357	0.553903	807	269	40	3	13	17	12	19	4	20	13	27	5	9	19	12	11	11	9	17	0	7	48.681	0.619	0	0	0	0	0	0	268	16	11	0.317934	1.08e-05	0.000181	0.000181	261
AMPTASEPG_b0237	140	0.214823	0.934928	2	84	131	134	137	0.613169	0.37037	0.557613	1458	486	42	4	29	36	13	42	16	31	29	54	11	26	23	14	15	22	26	36	6	10	39.382	0.756	0	0	0	0	0	0	485	0	0	0	0	0	0	0
ACACtex_b0929	44	1.53858	2.15677	0	56	129	52	126	0.556474	0.385675	0.490358	1089	363	34	0	27	14	19	49	1	14	19	23	5	32	5	13	12	16	22	26	2	29	37.082	0.832	3	3	3	3	3	3	362	0	0	0	0	0	0	0
PAPA180pp_b1278	82	0.0324914	0.618938	0	72	65	75	43	0.588235	0.466667	0.462745	765	255	29	2	3	15	11	15	6	16	10	32	5	3	13	11	18	10	15	21	17	2	55.788	0.485	0	0	0	0	0	0	254	2	2	0.75	0	3.2e-05	3.2e-05	7
G3PGabcpp_b3451	113	0.301202	1.14633	2	26	48	113	95	0.510638	0.382979	0.737589	846	282	25	1	8	9	23	14	3	25	5	37	16	11	15	5	10	12	23	26	8	5	41.782	0.626	2	0	0	0	0	0	281	1	10	0.160319	0	2.13e-05	2.13e-05	198
GLCptspp_b2416	315	0.342568	1.34241	0	114	167	148	147	0.619792	0.357639	0.512153	1728	576	63	4	39	60	18	36	8	51	35	58	18	17	15	21	31	26	29	35	2	9	43.52	0.718	0	0	0	0	0	0	575	2	10	0.311546	1.05e-06	3.2e-05	3.2e-05	302
LPLIPAL1E160pp_b0494	210	0.032285	0.623363	0	31	51	67	60	0.593301	0.382775	0.607656	627	209	22	0	12	7	11	10	4	7	8	29	7	11	14	17	11	11	6	10	6	5	46.887	0.587	0	0	0	0	0	0	208	6	9	0.261361	0.00310546	7.47e-05	7.47e-05	198
GDPtex_b0241	57	0.045701	0.726706	0	70	118	72	92	0.502841	0.372159	0.465909	1056	352	31	0	31	14	21	37	1	14	25	23	9	27	3	17	12	21	24	16	3	22	46.295	0.669	3	3	3	3	3	3	351	0	0	0	0	0	0	0
2AGPEAT141_b2836	53	0.183582	0.630585	1	136	179	211	194	0.611111	0.405556	0.5625	2160	720	55	4	30	45	36	55	16	39	38	78	23	13	41	27	51	33	44	61	8	22	47.712	0.603	0	0	0	0	0	0	719	4	12	0.138496	1.39e-05	5.34e-05	5.34e-05	198
ACGK_b3959	76	0.486438	1.39346	2	44	56	99	60	0.656371	0.393822	0.6139	777	259	30	1	15	13	3	27	5	18	13	37	8	11	10	11	9	11	12	20	2	2	42.048	0.612	0	0	0	0	0	0	258	167	10	0.32754	0.000384	0.00179299	0.00179299	91
COBALT2tex_b0929	44	1.53858	2.15677	0	56	129	52	126	0.556474	0.385675	0.490358	1089	363	34	0	27	14	19	49	1	14	19	23	5	32	5	13	12	16	22	26	2	29	37.082	0.832	3	3	3	3	3	3	362	336	9	0.424022	0.000798	0.00359666	0.00359666	91
THRPtex_b0929	44	1.53858	2.15677	0	56	129	52	126	0.556474	0.385675	0.490358	1089	363	34	0	27	14	19	49	1	14	19	23	5	32	5	13	12	16	22	26	2	29	37.082	0.832	3	3	3	3	3	3	362	0	0	0	0	0	0	0
HSDy_b0002	138	0.992219	1.81833	3	128	220	231	242	0.612667	0.403167	0.576127	2463	821	91	12	44	53	30	63	14	46	34	89	23	38	29	30	46	51	34	69	4	20	47.407	0.606	0	0	0	0	0	0	820	172	10	0.328771	0.000745	0.00184636	0.00184636	91
VALTA_b3770	353	0.467189	0.700141	0	51	71	90	98	0.612903	0.429032	0.606452	930	310	28	3	16	22	13	30	8	20	12	21	8	10	13	10	18	20	15	25	6	11	41.187	0.738	0	0	0	0	0	0	309	0	0	0	0	0	0	329
CRNDabcpp_b2679	85	0.0960721	1.60442	0	54	73	91	113	0.55287	0.407855	0.616314	993	331	41	2	20	13	13	27	8	15	24	22	7	22	15	16	4	12	26	21	8	14	45.371	0.715	0	0	0	0	0	0	330	0	0	0	0	0	0	71
MAN6Ptex_b2215	64	0.0280042	1.90111	9	51	107	58	152	0.570652	0.377717	0.570652	1104	368	29	0	32	11	19	48	1	10	17	27	4	32	4	21	13	17	24	25	4	29	29.032	0.898	3	3	3	3	3	3	367	0	0	0	0	0	0	0
MALDt2_2pp_b3528	176	0.0628768	1.03015	0	59	107	130	133	0.564103	0.37296	0.613054	1287	429	44	4	14	12	25	42	6	47	21	52	15	11	11	13	10	26	22	43	1	9	41.963	0.64	1	1	1	1	1	1	428	0	0	0	0	0	0	0
PMANM_b2048	152	0.151182	0.917402	0	68	98	119	172	0.619256	0.396061	0.636761	1371	457	40	5	34	31	21	42	10	26	24	44	12	22	21	7	30	15	24	32	4	12	40.653	0.686	0	0	0	0	0	0	456	3	2	0.714286	1.36e-06	4.27e-05	4.27e-05	276
MANptspp_b1819	121	0.238118	1.04384	3	46	73	75	90	0.59507	0.40493	0.580986	852	284	22	3	9	10	18	32	3	20	11	37	9	11	12	11	14	9	18	23	5	6	42.213	0.734	0	0	0	0	0	0	283	0	0	0	0	0	0	0
PLIPA2A180pp_b3821	101	0.0282509	0.656571	0	38	73	92	87	0.524138	0.396552	0.617241	870	290	18	0	16	15	10	23	5	9	10	29	8	20	13	12	13	19	18	18	10	23	46.721	0.641	0	0	0	0	0	0	289	2	9	0.214611	0	3.2e-05	3.2e-05	198
PDE4_b1489	83	0.025828	0.552918	0	148	208	205	239	0.5875	0.36375	0.555	2400	800	62	8	44	63	29	45	23	67	32	82	26	38	35	40	47	52	28	49	13	16	46.972	0.608	0	0	0	0	0	0	799	2	11	0.246182	0	3.2e-05	3.2e-05	167
UDPGD_b2028	86	0.129311	0.586124	0	83	133	77	96	0.521851	0.347044	0.44473	1167	389	32	2	26	23	17	19	5	36	24	30	10	24	15	13	22	28	17	27	0	18	48.875	0.604	0	0	0	0	0	0	388	64	11	0.334334	0.000232	0.000694	0.000694	306
TYRtex_b0241	57	0.045701	0.726706	0	70	118	72	92	0.502841	0.372159	0.465909	1056	352	31	0	31	14	21	37	1	14	25	23	9	27	3	17	12	21	24	16	3	22	46.295	0.669	3	3	3	3	3	3	351	5	11	0.315072	2.59e-06	6.4e-05	6.4e-05	261
TUNGSabcpp_b0763	193	0.0413747	1.14271	0	58	76	71	53	0.616279	0.430233	0.48062	774	258	42	0	16	12	11	18	3	10	22	21	3	9	10	8	7	16	14	24	4	7	41.288	0.697	0	0	0	0	0	0	257	0	0	0	0	0	0	0
ARGabcpp_b2306	76	0.0725659	0.641647	0	58	49	91	60	0.631783	0.341085	0.585271	774	258	15	1	8	22	9	21	9	13	16	30	8	10	9	17	15	17	9	24	1	3	48.831	0.57	7	7	7	7	6	5	257	1	13	0.195002	0	2.13e-05	2.13e-05	261
SUCptspp_b2415	225	0.0245069	1.24341	4	18	22	22	24	0.593023	0.395349	0.534884	258	86	9	0	1	9	4	6	2	3	7	8	2	2	2	6	1	6	10	7	0	0	38.988	0.805	1	1	1	0	0	0	85	0	0	0	0	0	0	0
ETHSO3tex_b0929	44	1.53858	2.15677	0	56	129	52	126	0.556474	0.385675	0.490358	1089	363	34	0	27	14	19	49	1	14	19	23	5	32	5	13	12	16	22	26	2	29	37.082	0.832	3	3	3	3	3	3	362	0	0	0	0	0	0	0
FACOAL141t2pp_b1805	265	0.429143	1.31904	0	95	148	182	137	0.6121	0.355872	0.567616	1686	562	38	4	29	34	20	43	12	24	32	65	15	27	34	24	26	23	27	59	4	21	47.219	0.627	0	0	0	0	0	0	561	17	11	0.160382	0.0101496	0.000192	0.000192	198
ILEt2rpp_b0401	115	0.11859	0.618946	0	52	119	139	130	0.593182	0.463636	0.611364	1320	440	57	5	10	6	26	40	6	32	5	61	10	9	20	11	14	32	28	47	8	12	40.858	0.696	0	0	0	0	0	0	439	3	12	0.241094	0.000831	4.27e-05	4.27e-05	261
ADCS_b1812	234	0.0671143	0.621225	0	88	133	113	120	0.610132	0.405286	0.513216	1362	454	38	6	29	31	21	25	12	25	13	47	8	15	23	30	28	31	26	27	7	11	48.366	0.611	0	0	0	0	0	0	453	336	9	0.424022	0.000798	0.00359666	0.00359666	91
NTD7pp_b0480	71	0.26015	0.883051	0	100	142	176	133	0.597096	0.368421	0.560799	1653	551	48	2	38	35	19	50	10	28	41	44	16	27	26	28	20	21	29	40	7	21	41.884	0.666	0	0	0	0	0	0	550	0	0	0	0	0	0	0
CLPNS140pp_b1249	74	0.0880751	0.417833	0	78	134	139	136	0.574949	0.410678	0.564682	1461	487	51	5	26	22	18	31	10	37	16	60	24	12	21	16	35	25	19	30	13	15	50.55	0.55	0	0	0	0	0	0	486	1	1	1	0	2.13e-05	2.13e-05	65
IPPS_b0074	450	1.23245	1.5591	5	89	114	127	194	0.601145	0.375954	0.612595	1572	524	61	6	29	41	15	35	15	39	27	36	13	30	12	22	27	30	23	46	2	14	41.61	0.69	0	0	0	0	0	0	523	164	10	0.374618	0.000251	0.00176098	0.00176098	91
OAADC_b1850	212	0.0546059	0.582003	0	38	53	73	50	0.654206	0.457944	0.574766	642	214	30	3	6	16	6	20	1	13	13	22	4	4	14	5	7	9	13	21	2	4	36.237	0.785	0	0	0	0	0	0	213	0	0	0	0	0	0	260
PPPNtex_b0241	57	0.045701	0.726706	0	70	118	72	92	0.502841	0.372159	0.465909	1056	352	31	0	31	14	21	37	1	14	25	23	9	27	3	17	12	21	24	16	3	22	46.295	0.669	3	3	3	3	3	3	351	0	0	0	0	0	0	0
PPNDH_b2599	81	0.31897	1.03534	0	86	100	105	96	0.576227	0.379845	0.51938	1161	387	38	4	15	29	11	18	15	22	17	50	8	16	15	22	21	25	23	24	2	11	51.692	0.578	1	0	0	0	0	0	386	162	10	0.37416	0.000425	0.00173963	0.00173963	91
NADH5_b1109	98	0.318241	1.08243	0	72	105	137	121	0.6	0.395402	0.593103	1305	435	39	4	18	23	11	42	17	26	25	52	14	23	17	14	22	20	26	27	2	12	42.461	0.672	0	0	0	0	0	0	434	0	0	0	0	0	0	225
LPLIPAL2A181_b3825	63	0.201587	0.617796	0	60	99	89	93	0.648094	0.431085	0.533724	1023	341	33	3	23	18	21	26	16	18	5	26	8	10	17	14	36	11	14	24	7	10	54.742	0.58	0	0	0	0	0	0	340	3	10	0.174601	0	4.27e-05	4.27e-05	198
FACOAL160t2pp_b1701	35	0.233017	0.883692	1	125	158	141	125	0.582878	0.420765	0.484517	1647	549	53	15	30	33	20	35	13	28	27	63	13	13	27	23	30	31	32	38	8	16	48.624	0.556	0	0	0	0	0	0	548	17	9	0.219338	0.0096141	0.000192	0.000192	198
VALt2rpp_b0401	115	0.11859	0.618946	0	52	119	139	130	0.593182	0.463636	0.611364	1320	440	57	5	10	6	26	40	6	32	5	61	10	9	20	11	14	32	28	47	8	12	40.858	0.696	0	0	0	0	0	0	439	3	12	0.239679	0.000831	4.27e-05	4.27e-05	261
GLCURt2rpp_b3909	29	0.0196335	0.713015	1	63	78	117	70	0.54878	0.463415	0.570122	984	328	44	2	5	11	19	36	3	32	14	35	13	4	16	5	6	20	25	31	3	3	48.778	0.552	0	0	0	0	0	0	327	0	0	0	0	0	0	0
N2Otex_b0241	57	0.045701	0.726706	0	70	118	72	92	0.502841	0.372159	0.465909	1056	352	31	0	31	14	21	37	1	14	25	23	9	27	3	17	12	21	24	16	3	22	46.295	0.669	3	3	3	3	3	3	351	0	0	0	0	0	0	0
GALBDtex_b0241	57	0.045701	0.726706	0	70	118	72	92	0.502841	0.372159	0.465909	1056	352	31	0	31	14	21	37	1	14	25	23	9	27	3	17	12	21	24	16	3	22	46.295	0.669	3	3	3	3	3	3	351	0	0	0	0	0	0	0
PPPNtex_b0929	44	1.53858	2.15677	0	56	129	52	126	0.556474	0.385675	0.490358	1089	363	34	0	27	14	19	49	1	14	19	23	5	32	5	13	12	16	22	26	2	29	37.082	0.832	3	3	3	3	3	3	362	0	0	0	0	0	0	0
ACONTa_b0118	180	0.518071	1.28601	2	125	216	268	257	0.646651	0.423788	0.606236	2598	866	97	10	55	57	29	76	15	47	49	88	22	31	54	25	39	36	47	59	8	21	36.904	0.774	0	0	0	0	0	0	865	186	10	0.331171	0.0010644	0.00199577	0.00199577	91
PROGLYabcpp_b3542	94	0.477481	0.754988	1	26	57	117	101	0.644518	0.401993	0.724252	903	301	36	2	12	6	15	25	3	18	5	46	13	11	17	10	12	13	10	33	6	7	38.227	0.688	3	3	3	3	3	3	300	0	0	0	0	0	0	0
LEUabcpp_b3455	374	0.0727302	0.529137	0	35	51	91	79	0.617188	0.375	0.664062	768	256	18	2	8	18	7	21	7	15	7	37	9	16	12	15	18	8	16	15	1	5	44.305	0.62	0	0	0	0	0	0	255	1	13	0.193553	0	2.13e-05	2.13e-05	261
PTRCabcpp_b0854	116	0.21931	1.40769	0	66	92	106	107	0.574124	0.377358	0.574124	1113	371	41	2	28	18	16	21	5	13	32	36	7	22	21	7	10	20	17	33	8	13	45.083	0.666	1	1	1	1	1	1	370	3	13	0.1955	9.35e-06	4.27e-05	4.27e-05	261
S4FE4SR_b1681	47	0.201335	0.975905	1	80	94	137	113	0.620283	0.389151	0.589623	1272	424	44	3	21	25	15	29	23	21	15	49	6	24	13	29	24	23	25	24	3	7	43.261	0.61	0	0	0	0	0	0	423	272	9	0.398115	0.000782	0.00291362	0.00291362	91
ULA4Ntppi_b2258	27	0.0443461	0.506067	0	26	36	44	23	0.51938	0.418605	0.51938	387	129	14	2	2	1	7	10	3	7	5	29	7	0	4	2	2	11	5	7	5	5	48.828	0.496	0	0	0	0	0	0	128	64	11	0.334334	0.000232	0.000694	0.000694	306
METS_b3829	268	1.24957	2.33275	8	121	163	264	206	0.65252	0.411141	0.623342	2262	754	77	7	50	52	21	46	19	40	36	86	9	25	37	34	48	31	41	53	23	18	42.949	0.691	0	0	0	0	0	0	753	162	10	0.37416	1.52e-05	0.00173963	0.00173963	91
ENTERES2_b0585	79	0.493133	0.893532	2	87	90	121	103	0.625935	0.46384	0.558603	1203	401	32	5	19	26	12	30	12	19	13	40	7	8	27	28	26	25	17	24	23	7	56.524	0.532	0	0	0	0	0	0	400	4	11	0.315234	0.000724	5.34e-05	5.34e-05	261
CGLYabcpp_b3541	203	0.541581	1.00757	0	51	65	115	97	0.64939	0.405488	0.646341	984	328	34	6	19	19	7	23	9	20	13	35	12	10	20	18	21	17	11	24	0	9	42.578	0.645	11	11	11	11	10	10	327	2	13	0.194198	0	3.2e-05	3.2e-05	261
CSND_b0337	104	0.560579	1.25564	0	76	95	133	124	0.614486	0.38785	0.600467	1284	428	39	3	23	26	13	32	19	28	13	43	9	20	18	26	22	18	26	30	7	12	45.797	0.611	0	0	0	0	0	0	427	2	3	0.421053	4.75e-06	3.2e-05	3.2e-05	298
THRD_L_b3117	298	0.104882	0.838422	0	75	110	54	91	0.548485	0.40303	0.439394	990	330	28	6	21	18	9	33	6	34	18	21	9	14	10	9	16	23	17	29	0	8	47.946	0.644	1	1	1	1	1	1	329	163	10	0.326754	0.000954	0.0017503	0.0017503	91
GTHRDtex_b0929	44	1.53858	2.15677	0	56	129	52	126	0.556474	0.385675	0.490358	1089	363	34	0	27	14	19	49	1	14	19	23	5	32	5	13	12	16	22	26	2	29	37.082	0.832	3	3	3	3	3	3	362	20	11	0.318017	0.000874	0.000224	0.000224	261
Ktex_b0241	57	0.045701	0.726706	0	70	118	72	92	0.502841	0.372159	0.465909	1056	352	31	0	31	14	21	37	1	14	25	23	9	27	3	17	12	21	24	16	3	22	46.295	0.669	3	3	3	3	3	3	351	336	9	0.424022	0.000798	0.00359666	0.00359666	91
MDDCP1pp_b2010	43	0.359791	0.829301	0	64	134	105	86	0.586118	0.401028	0.491003	1167	389	32	1	25	23	14	33	16	22	20	35	10	15	13	16	22	25	21	26	8	11	51.584	0.584	2	2	2	2	2	2	388	12	10	0.315072	2.25e-07	0.000139	0.000139	306
GLNtex_b1377	49	0.0274733	0.683685	1	68	140	60	110	0.550265	0.399471	0.449735	1134	378	42	0	37	12	19	43	5	9	17	27	9	33	5	14	11	21	24	17	5	27	40.354	0.74	3	3	3	3	3	3	377	0	0	0	0	0	0	0
NTD9_b2744	420	0.227363	0.722778	0	37	82	73	62	0.637795	0.472441	0.531496	762	254	24	5	21	6	5	25	7	14	5	23	4	11	17	9	15	14	17	23	3	5	42.933	0.589	0	0	0	0	0	0	253	0	0	0	0	0	0	250
ACGAM1Ptex_b2215	64	0.0280042	1.90111	9	51	107	58	152	0.570652	0.377717	0.570652	1104	368	29	0	32	11	19	48	1	10	17	27	4	32	4	21	13	17	24	25	4	29	29.032	0.898	3	3	3	3	3	3	367	0	0	0	0	0	0	0
SELR_b1590	52	0.101836	0.738668	0	53	75	78	79	0.578947	0.449123	0.550877	855	285	31	6	4	4	15	32	6	24	3	42	11	7	9	8	12	16	11	28	11	4	50.288	0.531	1	1	1	1	1	1	284	0	0	0	0	0	0	0
CU2tex_b0929	44	1.53858	2.15677	0	56	129	52	126	0.556474	0.385675	0.490358	1089	363	34	0	27	14	19	49	1	14	19	23	5	32	5	13	12	16	22	26	2	29	37.082	0.832	3	3	3	3	3	3	362	336	9	0.424022	0.000798	0.00359666	0.00359666	91
GALURt2rpp_b3093	36	0.10157	1.22927	0	61	108	156	108	0.579677	0.443418	0.6097	1299	433	61	3	9	13	24	39	7	31	13	47	20	13	19	15	13	21	21	34	15	14	35.016	0.764	0	0	0	0	0	0	432	0	0	0	0	0	0	0
DHORD2_b0945	381	0.478856	1.18139	0	67	114	77	79	0.575668	0.37092	0.462908	1011	337	25	4	20	17	11	32	6	30	21	36	7	18	19	14	17	12	16	21	0	10	47.116	0.597	0	0	0	0	0	0	336	6	11	0.315722	7.5e-06	7.47e-05	7.47e-05	261
ASPt2_2pp_b3528	176	0.0628768	1.03015	0	59	107	130	133	0.564103	0.37296	0.613054	1287	429	44	4	14	12	25	42	6	47	21	52	15	11	11	13	10	26	22	43	1	9	41.963	0.64	1	1	1	1	1	1	428	0	0	0	0	0	0	52
DHORD5_b0945	381	0.478856	1.18139	0	67	114	77	79	0.575668	0.37092	0.462908	1011	337	25	4	20	17	11	32	6	30	21	36	7	18	19	14	17	12	16	21	0	10	47.116	0.597	0	0	0	0	0	0	336	4	11	0.247075	0	5.34e-05	5.34e-05	91
GLYtex_b0929	44	1.53858	2.15677	0	56	129	52	126	0.556474	0.385675	0.490358	1089	363	34	0	27	14	19	49	1	14	19	23	5	32	5	13	12	16	22	26	2	29	37.082	0.832	3	3	3	3	3	3	362	3	11	0.315234	0.00122116	4.27e-05	4.27e-05	261
UACGAMtex_b0929	44	1.53858	2.15677	0	56	129	52	126	0.556474	0.385675	0.490358	1089	363	34	0	27	14	19	49	1	14	19	23	5	32	5	13	12	16	22	26	2	29	37.082	0.832	3	3	3	3	3	3	362	0	0	0	0	0	0	0
CLPNS180pp_b0789	74	0.216763	0.648401	0	74	93	128	119	0.649758	0.386473	0.596618	1242	414	37	2	22	30	17	26	15	22	16	42	9	18	21	19	38	12	14	30	9	14	45.21	0.594	0	0	0	0	0	0	413	1	1	1	0	2.13e-05	2.13e-05	67
RNTR1c2_b4238	108	0.0513211	0.838836	0	97	172	199	245	0.593268	0.389902	0.622721	2139	713	58	16	41	52	27	56	19	43	42	53	12	40	30	27	45	31	36	46	6	32	37.812	0.746	0	0	0	0	0	0	712	1	10	0.295894	0	2.13e-05	2.13e-05	302
NADH18pp_b2277	342	0.157195	0.717986	0	50	101	199	160	0.541176	0.396078	0.703922	1530	510	45	3	9	13	40	46	11	40	13	76	26	8	22	20	12	31	26	35	17	16	43.275	0.69	0	0	0	0	0	0	509	1	15	0.140369	0	2.13e-05	2.13e-05	261
NTD2pp_b4055	74	0.14684	0.511661	0	47	74	53	64	0.542017	0.44958	0.491597	714	238	23	1	14	11	13	15	3	16	12	14	5	15	16	8	13	20	13	16	5	4	52.306	0.599	0	0	0	0	0	0	237	0	0	0	0	0	0	0
H2O2tex_b2215	64	0.0280042	1.90111	9	51	107	58	152	0.570652	0.377717	0.570652	1104	368	29	0	32	11	19	48	1	10	17	27	4	32	4	21	13	17	24	25	4	29	29.032	0.898	3	3	3	3	3	3	367	0	0	0	0	0	0	0
ORNabcpp_b2306	76	0.0725659	0.641647	0	58	49	91	60	0.631783	0.341085	0.585271	774	258	15	1	8	22	9	21	9	13	16	30	8	10	9	17	15	17	9	24	1	3	48.831	0.57	7	7	7	7	6	5	257	1	13	0.19386	0	2.13e-05	2.13e-05	261
FE2tex_b2215	64	0.0280042	1.90111	9	51	107	58	152	0.570652	0.377717	0.570652	1104	368	29	0	32	11	19	48	1	10	17	27	4	32	4	21	13	17	24	25	4	29	29.032	0.898	3	3	3	3	3	3	367	1	1	1	0	2.13e-05	2.13e-05	115
2AGPE181tipp_b2835	60	0.122308	0.614945	0	50	93	149	106	0.580402	0.444724	0.640704	1194	398	57	4	4	9	20	43	4	26	12	57	14	16	14	10	10	22	18	38	9	10	50.482	0.583	0	0	0	0	0	0	397	5	8	0.256867	0.00146198	6.4e-05	6.4e-05	198
GLCDpp_b0837	181	0.0268238	0.938673	0	71	106	91	104	0.602151	0.424731	0.524194	1116	372	25	1	28	15	15	42	7	17	20	37	7	16	22	17	20	22	14	24	12	10	50.872	0.582	0	0	0	0	0	0	371	6	12	0.240102	4.75e-06	7.47e-05	7.47e-05	261
BUTSO3abcpp_b0366	389	0.16178	0.96147	0	48	50	95	63	0.675781	0.386719	0.617188	768	256	21	1	8	20	11	25	4	13	10	39	6	7	10	18	17	13	8	16	3	5	49.056	0.596	14	14	14	14	13	11	255	0	0	0	0	0	0	0
LPLIPAL2ATE181_b3825	63	0.201587	0.617796	0	60	99	89	93	0.648094	0.431085	0.533724	1023	341	33	3	23	18	21	26	16	18	5	26	8	10	17	14	36	11	14	24	7	10	54.742	0.58	0	0	0	0	0	0	340	0	0	0	0	0	0	0
ICHORT_b0595	72	0.394552	0.979806	1	35	59	114	78	0.611888	0.377622	0.671329	858	286	29	3	27	16	9	10	7	15	14	28	14	8	18	12	17	14	10	18	7	9	43.626	0.691	0	0	0	0	0	0	285	32	10	0.309735	3.34e-05	0.000352	0.000352	306
CBMKr_b0323	54	0.279913	0.718521	2	49	70	96	102	0.652997	0.40694	0.624606	951	317	33	4	20	19	8	29	9	26	17	24	5	8	17	17	15	11	19	29	1	5	44.002	0.639	2	2	2	2	2	2	316	0	0	0	0	0	0	61
PIuabcpp_b3726	265	0.105233	1.17715	1	25	64	135	73	0.538721	0.447811	0.700337	891	297	38	1	3	11	13	21	2	27	10	41	17	9	12	8	13	16	22	18	9	5	35.338	0.714	1	1	0	0	0	0	296	0	0	0	0	0	0	275
MALTPTtexi_b4036	60	0.669972	1.19331	0	59	121	97	170	0.530201	0.422819	0.597315	1341	447	40	2	33	21	20	49	6	20	20	22	16	31	9	22	17	28	25	24	19	22	41.864	0.773	0	0	0	0	0	0	446	0	0	0	0	0	0	0
ZN2tpp_b3040	69	0.108139	0.729887	0	53	59	87	59	0.589147	0.437984	0.565891	774	258	34	1	4	8	11	30	4	21	6	42	15	7	15	5	4	18	9	17	2	4	45.75	0.495	0	0	0	0	0	0	257	22	10	0.313219	1.44e-06	0.000245	0.000245	91
ARGDCpp_b2938	163	0.0490415	0.824515	0	95	160	208	196	0.640364	0.37481	0.61305	1977	659	49	8	43	54	20	51	21	33	18	67	24	23	28	36	37	41	24	47	9	25	42.468	0.704	0	0	0	0	0	0	658	16	11	0.258493	1.69e-06	0.000181	0.000181	261
THMabcpp_b0066	56	0.119696	0.551436	0	34	40	103	56	0.587983	0.44206	0.682403	699	233	21	2	8	9	5	20	6	11	6	36	11	8	11	14	14	18	15	14	2	1	44.056	0.531	11	11	11	11	11	11	232	0	0	0	0	0	0	0
HYD1pp_b2995	58	0.157324	0.757321	0	39	85	155	114	0.549618	0.389313	0.684478	1179	393	29	5	9	12	29	35	7	31	12	62	14	12	20	7	15	27	11	30	10	15	39.281	0.661	0	0	0	0	0	0	392	1	13	0.194414	0	2.13e-05	2.13e-05	261
CHORM_b2599	81	0.31897	1.03534	0	86	100	105	96	0.576227	0.379845	0.51938	1161	387	38	4	15	29	11	18	15	22	17	50	8	16	15	22	21	25	23	24	2	11	51.692	0.578	1	0	0	0	0	0	386	160	10	0.326406	1.52e-05	0.00171829	0.00171829	91
ASPtex_b0929	44	1.53858	2.15677	0	56	129	52	126	0.556474	0.385675	0.490358	1089	363	34	0	27	14	19	49	1	14	19	23	5	32	5	13	12	16	22	26	2	29	37.082	0.832	3	3	3	3	3	3	362	2	11	0.314587	0	3.2e-05	3.2e-05	261
FACOAL140t2pp_b1805	265	0.429143	1.31904	0	95	148	182	137	0.6121	0.355872	0.567616	1686	562	38	4	29	34	20	43	12	24	32	65	15	27	34	24	26	23	27	59	4	21	47.219	0.627	0	0	0	0	0	0	561	17	11	0.160424	0.010149	0.000192	0.000192	197
ALLTN_b0512	66	0.0257784	0.633219	0	84	131	106	133	0.629956	0.39207	0.526432	1362	454	38	12	33	32	18	44	12	29	26	33	13	13	19	19	22	19	20	38	4	9	38.349	0.796	1	0	0	0	0	0	453	7	12	0.24349	0.000176	8.54e-05	8.54e-05	261
GLYBtex_b0241	57	0.045701	0.726706	0	70	118	72	92	0.502841	0.372159	0.465909	1056	352	31	0	31	14	21	37	1	14	25	23	9	27	3	17	12	21	24	16	3	22	46.295	0.669	3	3	3	3	3	3	351	0	0	0	0	0	0	0
CMtex_b1377	49	0.0274733	0.683685	1	68	140	60	110	0.550265	0.399471	0.449735	1134	378	42	0	37	12	19	43	5	9	17	27	9	33	5	14	11	21	24	17	5	27	40.354	0.74	3	3	3	3	3	3	377	1	1	1	0	2.13e-05	2.13e-05	68
TMPPP_b3993	170	0.757874	1.2237	3	39	50	69	54	0.712264	0.448113	0.580189	636	212	31	0	15	10	4	15	5	14	3	22	3	3	11	12	17	8	9	19	3	7	49.262	0.57	0	0	0	0	0	0	211	336	9	0.424022	0.000798	0.00359666	0.00359666	91
CMtex_b0929	44	1.53858	2.15677	0	56	129	52	126	0.556474	0.385675	0.490358	1089	363	34	0	27	14	19	49	1	14	19	23	5	32	5	13	12	16	22	26	2	29	37.082	0.832	3	3	3	3	3	3	362	1	1	1	0	2.13e-05	2.13e-05	68
G3PEtex_b0929	44	1.53858	2.15677	0	56	129	52	126	0.556474	0.385675	0.490358	1089	363	34	0	27	14	19	49	1	14	19	23	5	32	5	13	12	16	22	26	2	29	37.082	0.832	3	3	3	3	3	3	362	2	11	0.314587	0	3.2e-05	3.2e-05	261
NTD11pp_b0480	71	0.26015	0.883051	0	100	142	176	133	0.597096	0.368421	0.560799	1653	551	48	2	38	35	19	50	10	28	41	44	16	27	26	28	20	21	29	40	7	21	41.884	0.666	0	0	0	0	0	0	550	0	0	0	0	0	0	0
GPDDA4pp_b2239	68	0.0508723	0.964293	0	65	114	116	64	0.554318	0.311978	0.501393	1077	359	26	1	31	23	14	24	10	17	32	29	15	17	16	16	10	12	19	22	4	20	47.602	0.648	0	0	0	0	0	0	358	0	0	0	0	0	0	162
MOBDabcpp_b3917	210	0.116454	1.76301	0	65	80	98	87	0.572727	0.384848	0.560606	990	330	34	0	19	23	11	24	6	18	28	24	2	20	12	12	13	18	17	26	8	14	46.958	0.676	1	1	1	1	1	1	329	336	9	0.424022	0.000798	0.00359666	0.00359666	91
ETOHtex_b0929	44	1.53858	2.15677	0	56	129	52	126	0.556474	0.385675	0.490358	1089	363	34	0	27	14	19	49	1	14	19	23	5	32	5	13	12	16	22	26	2	29	37.082	0.832	3	3	3	3	3	3	362	4	11	0.314748	0	5.34e-05	5.34e-05	261
DHACOAH_b1393	327	0.210377	0.649769	0	62	52	71	71	0.636719	0.445312	0.554688	768	256	41	3	9	14	8	17	2	9	8	39	6	11	8	19	16	15	13	14	1	2	47.93	0.532	3	3	3	3	3	2	255	0	0	0	0	0	0	0
GLCptspp_b1621	76	0.0474229	0.741388	0	78	128	142	183	0.561205	0.408663	0.612053	1593	531	48	7	14	13	35	56	13	45	17	64	18	20	24	17	15	30	30	50	7	7	43.824	0.648	3	3	2	1	1	1	530	2	10	0.311546	1.05e-06	3.2e-05	3.2e-05	302
ASNN_b1767	130	0.0400413	0.661324	0	64	94	91	90	0.60177	0.39823	0.533923	1017	339	29	1	18	18	10	28	12	22	10	34	12	17	22	16	15	16	23	20	1	14	44.051	0.613	0	0	0	0	0	0	338	0	0	0	0	0	0	49
RNDR3b_b3610	285	0.171768	0.710785	0	14	22	21	27	0.583333	0.416667	0.571429	252	84	8	3	6	5	2	7	2	6	6	8	2	2	4	3	5	4	4	3	0	3	38.071	0.722	1	1	1	0	0	0	83	2	13	0.194475	0	3.2e-05	3.2e-05	261
HYD3pp_b2995	58	0.157324	0.757321	0	39	85	155	114	0.549618	0.389313	0.684478	1179	393	29	5	9	12	29	35	7	31	12	62	14	12	20	7	15	27	11	30	10	15	39.281	0.661	0	0	0	0	0	0	392	2	13	0.194785	0.00496475	3.2e-05	3.2e-05	261
ACGAM1Ptex_b0929	44	1.53858	2.15677	0	56	129	52	126	0.556474	0.385675	0.490358	1089	363	34	0	27	14	19	49	1	14	19	23	5	32	5	13	12	16	22	26	2	29	37.082	0.832	3	3	3	3	3	3	362	0	0	0	0	0	0	0
MALS_b4014	173	0.27808	1.58665	1	95	128	155	156	0.578652	0.391386	0.582397	1602	534	52	5	34	38	23	32	12	36	26	50	14	25	24	25	31	21	33	26	11	15	46.556	0.657	0	0	0	0	0	0	533	1	10	0.295894	0	2.13e-05	2.13e-05	302
VALabcpp_b3460	71	1.56055	1.99746	12	66	72	122	108	0.611413	0.396739	0.625	1104	368	49	3	26	17	11	36	4	22	31	27	7	16	15	20	7	15	18	27	3	13	37.233	0.73	1	1	1	1	1	1	367	1	13	0.19337	0	2.13e-05	2.13e-05	261
GLYBtex_b2215	64	0.0280042	1.90111	9	51	107	58	152	0.570652	0.377717	0.570652	1104	368	29	0	32	11	19	48	1	10	17	27	4	32	4	21	13	17	24	25	4	29	29.032	0.898	3	3	3	3	3	3	367	0	0	0	0	0	0	0
MLTG4_b0403	60	0.0352794	0.304984	0	96	161	207	141	0.647934	0.414876	0.575207	1815	605	51	7	45	27	26	45	22	21	19	57	15	21	37	41	40	26	23	38	22	21	46.909	0.604	0	0	0	0	0	0	604	1	1	1	0	2.13e-05	2.13e-05	216
PAPSR2_b3610	285	0.171768	0.710785	0	14	22	21	27	0.583333	0.416667	0.571429	252	84	8	3	6	5	2	7	2	6	6	8	2	2	4	3	5	4	4	3	0	3	38.071	0.722	1	1	1	0	0	0	83	7	11	0.315884	0.00356214	8.54e-05	8.54e-05	261
FUSAtpp_b0463	141	0.0342673	0.499558	0	78	103	112	105	0.640704	0.429648	0.545226	1194	398	47	1	22	17	7	32	1	20	23	34	4	17	18	36	17	22	33	36	1	9	46.088	0.66	1	1	1	1	1	1	397	1	1	1	0	2.13e-05	2.13e-05	125
MNLtex_b0241	57	0.045701	0.726706	0	70	118	72	92	0.502841	0.372159	0.465909	1056	352	31	0	31	14	21	37	1	14	25	23	9	27	3	17	12	21	24	16	3	22	46.295	0.669	3	3	3	3	3	3	351	0	0	0	0	0	0	0
OCTAtex_b0929	44	1.53858	2.15677	0	56	129	52	126	0.556474	0.385675	0.490358	1089	363	34	0	27	14	19	49	1	14	19	23	5	32	5	13	12	16	22	26	2	29	37.082	0.832	3	3	3	3	3	3	362	0	0	0	0	0	0	0
HPPPNDO_b0348	72	0.174495	0.904757	7	36	77	107	95	0.650794	0.44127	0.64127	945	315	35	4	14	22	17	27	10	14	8	33	7	9	21	11	17	20	10	24	4	7	47.932	0.56	0	0	0	0	0	0	314	0	0	0	0	0	0	0
G3PItex_b1377	49	0.0274733	0.683685	1	68	140	60	110	0.550265	0.399471	0.449735	1134	378	42	0	37	12	19	43	5	9	17	27	9	33	5	14	11	21	24	17	5	27	40.354	0.74	3	3	3	3	3	3	377	0	0	0	0	0	0	0
RFAMPtpp_b0463	141	0.0342673	0.499558	0	78	103	112	105	0.640704	0.429648	0.545226	1194	398	47	1	22	17	7	32	1	20	23	34	4	17	18	36	17	22	33	36	1	9	46.088	0.66	1	1	1	1	1	1	397	1	1	1	0	2.13e-05	2.13e-05	299
ETOHtex_b1377	49	0.0274733	0.683685	1	68	140	60	110	0.550265	0.399471	0.449735	1134	378	42	0	37	12	19	43	5	9	17	27	9	33	5	14	11	21	24	17	5	27	40.354	0.74	3	3	3	3	3	3	377	4	11	0.314748	0	5.34e-05	5.34e-05	261
CHLabcpp_b2128	144	0.135914	0.895163	1	36	58	95	55	0.647541	0.463115	0.614754	732	244	38	0	3	6	13	21	2	24	4	33	4	2	16	11	10	11	13	24	4	4	50.143	0.567	0	0	0	0	0	0	243	0	0	0	0	0	0	0
GALBDtex_b0929	44	1.53858	2.15677	0	56	129	52	126	0.556474	0.385675	0.490358	1089	363	34	0	27	14	19	49	1	14	19	23	5	32	5	13	12	16	22	26	2	29	37.082	0.832	3	3	3	3	3	3	362	0	0	0	0	0	0	0
SO4tex_b0929	44	1.53858	2.15677	0	56	129	52	126	0.556474	0.385675	0.490358	1089	363	34	0	27	14	19	49	1	14	19	23	5	32	5	13	12	16	22	26	2	29	37.082	0.832	3	3	3	3	3	3	362	165	10	0.374732	0.000184	0.00177165	0.00177165	91
GLUtex_b2215	64	0.0280042	1.90111	9	51	107	58	152	0.570652	0.377717	0.570652	1104	368	29	0	32	11	19	48	1	10	17	27	4	32	4	21	13	17	24	25	4	29	29.032	0.898	3	3	3	3	3	3	367	2	11	0.314587	0	3.2e-05	3.2e-05	261
O2tex_b0241	57	0.045701	0.726706	0	70	118	72	92	0.502841	0.372159	0.465909	1056	352	31	0	31	14	21	37	1	14	25	23	9	27	3	17	12	21	24	16	3	22	46.295	0.669	3	3	3	3	3	3	351	1	1	1	0	2.13e-05	2.13e-05	69
ACALD_b0351	115	0.09299	0.871442	0	56	81	91	89	0.630915	0.435331	0.567823	951	317	47	2	17	19	5	25	6	24	13	21	14	12	16	11	15	16	15	30	1	7	45.879	0.639	0	0	0	0	0	0	316	0	0	0	0	0	0	14
NADH16pp_b2287	471	0.0238767	0.890042	0	32	63	65	61	0.59276	0.38914	0.570136	663	221	13	5	13	14	6	15	1	11	9	14	12	11	14	11	16	10	9	22	4	10	47.186	0.704	2	2	2	2	2	0	220	1	10	0.295894	0	2.13e-05	2.13e-05	302
FEENTERtonex_b3005	218	0.0344865	0.980261	0	22	26	56	38	0.521127	0.323944	0.661972	426	142	12	0	12	8	5	6	3	8	10	14	9	8	8	2	2	4	14	13	0	3	44.707	0.653	0	0	0	0	0	0	141	7	11	0.315315	4.02e-06	8.54e-05	8.54e-05	261
GBBTNtex_b0929	44	1.53858	2.15677	0	56	129	52	126	0.556474	0.385675	0.490358	1089	363	34	0	27	14	19	49	1	14	19	23	5	32	5	13	12	16	22	26	2	29	37.082	0.832	3	3	3	3	3	3	362	0	0	0	0	0	0	0
G3PEtex_b0241	57	0.045701	0.726706	0	70	118	72	92	0.502841	0.372159	0.465909	1056	352	31	0	31	14	21	37	1	14	25	23	9	27	3	17	12	21	24	16	3	22	46.295	0.669	3	3	3	3	3	3	351	2	11	0.314587	0	3.2e-05	3.2e-05	261
GLYC3Pt6pp_b2240	72	0.0308524	0.846449	0	59	114	160	120	0.540839	0.419426	0.618102	1359	453	45	7	14	14	33	47	7	31	16	49	22	13	24	10	17	20	15	31	15	22	45.059	0.666	0	0	0	0	0	0	452	0	0	0	0	0	0	151
PLIPA1G161pp_b3821	101	0.0282509	0.656571	0	38	73	92	87	0.524138	0.396552	0.617241	870	290	18	0	16	15	10	23	5	9	10	29	8	20	13	12	13	19	18	18	10	23	46.721	0.641	0	0	0	0	0	0	289	4	10	0.182809	1.74e-05	5.34e-05	5.34e-05	198
IMPtex_b1377	49	0.0274733	0.683685	1	68	140	60	110	0.550265	0.399471	0.449735	1134	378	42	0	37	12	19	43	5	9	17	27	9	33	5	14	11	21	24	17	5	27	40.354	0.74	3	3	3	3	3	3	377	0	0	0	0	0	0	0
PLIPA1E181pp_b3821	101	0.0282509	0.656571	0	38	73	92	87	0.524138	0.396552	0.617241	870	290	18	0	16	15	10	23	5	9	10	29	8	20	13	12	13	19	18	18	10	23	46.721	0.641	0	0	0	0	0	0	289	5	8	0.256867	0.00146198	6.4e-05	6.4e-05	198
BUTSO3abcpp_b0365	75	0.126267	1.26614	0	61	54	110	96	0.623053	0.423676	0.641745	963	321	45	0	16	14	10	20	3	19	22	25	1	12	19	22	8	21	16	33	7	7	44.002	0.67	0	0	0	0	0	0	320	0	0	0	0	0	0	0
H2Stex_b0929	44	1.53858	2.15677	0	56	129	52	126	0.556474	0.385675	0.490358	1089	363	34	0	27	14	19	49	1	14	19	23	5	32	5	13	12	16	22	26	2	29	37.082	0.832	3	3	3	3	3	3	362	2	1	1	0	3.2e-05	3.2e-05	172
PLIPA2A161pp_b3821	101	0.0282509	0.656571	0	38	73	92	87	0.524138	0.396552	0.617241	870	290	18	0	16	15	10	23	5	9	10	29	8	20	13	12	13	19	18	18	10	23	46.721	0.641	0	0	0	0	0	0	289	2	10	0.179883	0	3.2e-05	3.2e-05	198
ACGAL1Ptex_b1377	49	0.0274733	0.683685	1	68	140	60	110	0.550265	0.399471	0.449735	1134	378	42	0	37	12	19	43	5	9	17	27	9	33	5	14	11	21	24	17	5	27	40.354	0.74	3	3	3	3	3	3	377	0	0	0	0	0	0	0
MN2t3pp_b3915	77	0.142359	0.60213	0	47	88	115	51	0.58804	0.425249	0.551495	903	301	31	2	16	9	9	20	9	25	3	38	11	4	11	16	18	28	12	24	6	8	49.348	0.5	0	0	0	0	0	0	300	0	0	0	0	0	0	219
23CCMPtex_b1377	49	0.0274733	0.683685	1	68	140	60	110	0.550265	0.399471	0.449735	1134	378	42	0	37	12	19	43	5	9	17	27	9	33	5	14	11	21	24	17	5	27	40.354	0.74	3	3	3	3	3	3	377	0	0	0	0	0	0	0
PYDXNtex_b2215	64	0.0280042	1.90111	9	51	107	58	152	0.570652	0.377717	0.570652	1104	368	29	0	32	11	19	48	1	10	17	27	4	32	4	21	13	17	24	25	4	29	29.032	0.898	3	3	3	3	3	3	367	0	0	0	0	0	0	0
THYMtex_b0241	57	0.045701	0.726706	0	70	118	72	92	0.502841	0.372159	0.465909	1056	352	31	0	31	14	21	37	1	14	25	23	9	27	3	17	12	21	24	16	3	22	46.295	0.669	3	3	3	3	3	3	351	4	11	0.314748	0	5.34e-05	5.34e-05	261
CUt3_b0575	173	0.177585	1.28876	0	139	218	428	263	0.60687	0.40458	0.659351	3144	1048	104	2	42	61	30	78	16	83	43	121	35	28	55	37	51	59	54	99	21	28	41.819	0.61	0	0	0	0	0	0	1047	0	0	0	0	0	0	0
TMAOR2_b0894	43	0.258452	0.808415	0	128	218	226	243	0.573006	0.433129	0.57546	2445	815	65	15	47	51	18	72	17	55	44	55	25	39	46	29	49	44	49	46	13	35	44.292	0.693	2	2	2	2	2	2	814	0	0	0	0	0	0	0
NADH16pp_b2277	342	0.157195	0.717986	0	50	101	199	160	0.541176	0.396078	0.703922	1530	510	45	3	9	13	40	46	11	40	13	76	26	8	22	20	12	31	26	35	17	16	43.275	0.69	0	0	0	0	0	0	509	1	10	0.295894	0	2.13e-05	2.13e-05	302
CYSDtex_b2215	64	0.0280042	1.90111	9	51	107	58	152	0.570652	0.377717	0.570652	1104	368	29	0	32	11	19	48	1	10	17	27	4	32	4	21	13	17	24	25	4	29	29.032	0.898	3	3	3	3	3	3	367	0	0	0	0	0	0	0
ADOCBIK_b1993	287	0.352705	0.905836	4	35	57	62	28	0.631868	0.39011	0.494505	546	182	19	3	11	14	2	12	7	14	5	15	6	7	5	10	12	8	7	17	4	3	52.684	0.529	0	0	0	0	0	0	181	0	0	0	0	0	0	0
ADNCYC_b3806	99	0.318176	0.90899	0	127	212	257	253	0.584217	0.37338	0.600707	2547	849	47	15	43	60	37	47	25	39	29	105	15	42	39	40	56	63	33	57	16	40	46.326	0.635	0	0	0	0	0	0	848	1	1	1	0	2.13e-05	2.13e-05	28
CMtpp_b3035	76	0.232213	0.78678	0	80	129	139	146	0.554656	0.408907	0.576923	1482	494	57	0	25	20	10	24	3	21	18	53	6	43	17	44	22	44	36	28	1	21	45.516	0.658	0	0	0	0	0	0	493	1	1	1	0	2.13e-05	2.13e-05	68
FHL_b2719	135	0.119729	1.03609	0	37	68	73	78	0.648438	0.453125	0.589844	768	256	25	7	15	16	6	23	6	17	9	23	6	7	18	8	19	12	8	18	3	9	42.444	0.67	2	2	2	2	2	1	255	6	12	0.241284	0.00743898	7.47e-05	7.47e-05	261
PYDXtex_b0241	57	0.045701	0.726706	0	70	118	72	92	0.502841	0.372159	0.465909	1056	352	31	0	31	14	21	37	1	14	25	23	9	27	3	17	12	21	24	16	3	22	46.295	0.669	3	3	3	3	3	3	351	0	0	0	0	0	0	0
PPALtex_b0929	44	1.53858	2.15677	0	56	129	52	126	0.556474	0.385675	0.490358	1089	363	34	0	27	14	19	49	1	14	19	23	5	32	5	13	12	16	22	26	2	29	37.082	0.832	3	3	3	3	3	3	362	0	0	0	0	0	0	0
MTHFR2_b3941	281	0.542346	1.74235	0	42	86	91	78	0.582492	0.40404	0.569024	891	297	29	3	23	16	16	17	7	19	15	24	9	12	14	9	20	20	14	19	3	7	43.235	0.688	0	0	0	0	0	0	296	162	10	0.37416	1.52e-05	0.00173963	0.00173963	91
ACMUMptspp_b2415	225	0.0245069	1.24341	4	18	22	22	24	0.593023	0.395349	0.534884	258	86	9	0	1	9	4	6	2	3	7	8	2	2	2	6	1	6	10	7	0	0	38.988	0.805	1	1	1	0	0	0	85	0	0	0	0	0	0	0
PAPA180_b1278	82	0.0324914	0.618938	0	72	65	75	43	0.588235	0.466667	0.462745	765	255	29	2	3	15	11	15	6	16	10	32	5	3	13	11	18	10	15	21	17	2	55.788	0.485	0	0	0	0	0	0	254	1	2	0.6	0	2.13e-05	2.13e-05	7
ARGSS_b3172	91	0.917407	1.83132	8	67	121	123	137	0.595982	0.401786	0.580357	1344	448	35	3	27	34	13	43	10	27	19	43	17	20	13	17	27	24	29	21	6	19	44.196	0.736	0	0	0	0	0	0	447	161	10	0.326754	0.000174	0.00172896	0.00172896	91
ECOAH4_b2341	124	0.0138785	1.06552	4	141	202	204	168	0.61958	0.427972	0.52028	2145	715	75	9	30	44	24	69	13	52	40	68	16	20	38	35	44	32	37	53	2	13	52.384	0.575	4	4	4	4	4	2	714	3	1	1	0	4.27e-05	4.27e-05	18
PYROX_b1012	58	0.257249	1.35988	5	56	84	106	137	0.569191	0.449086	0.634465	1149	383	43	4	25	20	22	30	6	16	14	27	17	11	17	17	20	21	29	24	7	12	49.475	0.621	0	0	0	0	0	0	382	16	11	0.316865	3.5e-05	0.000181	0.000181	261
TRPt2rpp_b0112	54	0.485507	1.29082	4	70	100	150	138	0.561135	0.39083	0.628821	1374	458	52	4	5	16	29	42	7	38	15	54	20	18	17	15	10	24	18	46	12	15	39.487	0.692	6	6	6	6	6	6	457	3	11	0.314667	0	4.27e-05	4.27e-05	261
GTHRDabcpp_b0831	186	0.184218	0.658853	1	38	75	116	78	0.583062	0.390879	0.631922	921	307	29	0	12	10	17	21	5	23	5	40	14	7	15	10	17	18	11	35	9	8	43.845	0.562	4	4	4	4	4	4	306	1	13	0.194785	0	2.13e-05	2.13e-05	261
NO3R2bpp_b2203	103	0.112598	0.633556	0	24	35	52	39	0.586667	0.473333	0.606667	450	150	12	5	6	6	4	12	5	4	7	7	6	6	12	9	7	10	11	13	2	5	42.809	0.678	0	0	0	0	0	0	149	0	0	0	0	0	0	0
NTPP3_b2251	51	0.248397	0.656847	0	33	42	36	31	0.591549	0.366197	0.471831	426	142	8	3	10	15	4	10	1	11	7	15	2	4	5	5	12	3	8	9	3	6	54.351	0.551	0	0	0	0	0	0	141	0	0	0	0	0	0	255
SBTptspp_b2415	225	0.0245069	1.24341	4	18	22	22	24	0.593023	0.395349	0.534884	258	86	9	0	1	9	4	6	2	3	7	8	2	2	2	6	1	6	10	7	0	0	38.988	0.805	1	1	1	0	0	0	85	0	0	0	0	0	0	0
INSK_b0477	45	0.0519834	0.894175	0	76	107	130	122	0.577011	0.4	0.57931	1305	435	38	7	24	30	13	29	13	21	21	42	11	21	22	18	20	30	22	26	6	20	41.31	0.659	0	0	0	0	0	0	434	0	0	0	0	0	0	189
FLDR2_b2895	87	0.0369536	0.914535	0	29	38	50	57	0.597701	0.327586	0.614943	522	174	9	2	16	16	6	16	3	10	8	22	6	5	6	8	2	7	8	8	6	9	43.106	0.664	1	1	1	1	1	1	173	0	0	0	0	0	0	119
23DAPPAtex_b2215	64	0.0280042	1.90111	9	51	107	58	152	0.570652	0.377717	0.570652	1104	368	29	0	32	11	19	48	1	10	17	27	4	32	4	21	13	17	24	25	4	29	29.032	0.898	3	3	3	3	3	3	367	0	0	0	0	0	0	0
PUNP3_b2407	245	0.149857	0.85186	2	45	81	86	66	0.597122	0.406475	0.546763	834	278	27	6	11	16	16	27	8	17	12	27	10	10	13	8	11	15	13	24	0	6	47.137	0.604	0	0	0	0	0	0	277	0	0	0	0	0	0	289
NI2t3pp_b0752	222	0.146517	0.843698	2	50	87	100	77	0.636943	0.39172	0.563694	942	314	32	3	12	16	9	20	25	21	4	45	11	9	14	7	16	17	14	27	7	4	55.159	0.539	0	0	0	0	0	0	313	0	0	0	0	0	0	239
Zn2tex_b0241	57	0.045701	0.726706	0	70	118	72	92	0.502841	0.372159	0.465909	1056	352	31	0	31	14	21	37	1	14	25	23	9	27	3	17	12	21	24	16	3	22	46.295	0.669	3	3	3	3	3	3	351	336	9	0.424022	0.000798	0.00359666	0.00359666	91
THRAi_b0870	222	0.0943977	0.689047	0	54	76	93	111	0.652695	0.422156	0.610778	1002	334	47	4	20	22	8	25	8	16	13	35	11	15	11	11	23	12	15	23	4	10	46.2	0.626	0	0	0	0	0	0	333	0	0	0	0	0	0	313
TALA_b0008	149	0.0202271	1.29194	3	58	78	93	89	0.603774	0.383648	0.572327	954	318	39	3	21	25	7	17	2	26	22	33	5	11	10	15	16	16	17	16	4	12	35.835	0.789	1	1	1	1	1	1	317	0	0	0	0	0	0	311
CYSS_b2421	299	0.378339	0.909793	4	48	68	102	86	0.621711	0.453947	0.618421	912	304	28	2	13	24	7	35	4	19	11	24	12	13	14	11	20	17	19	21	3	6	42.063	0.612	1	1	1	1	1	1	303	162	10	0.327103	0.000113	0.00173963	0.00173963	91
23CGMPtex_b0929	44	1.53858	2.15677	0	56	129	52	126	0.556474	0.385675	0.490358	1089	363	34	0	27	14	19	49	1	14	19	23	5	32	5	13	12	16	22	26	2	29	37.082	0.832	3	3	3	3	3	3	362	0	0	0	0	0	0	0
GAMAN6Ptex_b0929	44	1.53858	2.15677	0	56	129	52	126	0.556474	0.385675	0.490358	1089	363	34	0	27	14	19	49	1	14	19	23	5	32	5	13	12	16	22	26	2	29	37.082	0.832	3	3	3	3	3	3	362	0	0	0	0	0	0	0
CYSDtex_b1377	49	0.0274733	0.683685	1	68	140	60	110	0.550265	0.399471	0.449735	1134	378	42	0	37	12	19	43	5	9	17	27	9	33	5	14	11	21	24	17	5	27	40.354	0.74	3	3	3	3	3	3	377	0	0	0	0	0	0	0
ANHGMtex_b1377	49	0.0274733	0.683685	1	68	140	60	110	0.550265	0.399471	0.449735	1134	378	42	0	37	12	19	43	5	9	17	27	9	33	5	14	11	21	24	17	5	27	40.354	0.74	3	3	3	3	3	3	377	2	11	0.314587	0	3.2e-05	3.2e-05	261
SULabcpp_b3917	210	0.116454	1.76301	0	65	80	98	87	0.572727	0.384848	0.560606	990	330	34	0	19	23	11	24	6	18	28	24	2	20	12	12	13	18	17	26	8	14	46.958	0.676	1	1	1	1	1	1	329	7	11	0.314991	333000000	8.54e-05	8.54e-05	91
GLYCtex_b0929	44	1.53858	2.15677	0	56	129	52	126	0.556474	0.385675	0.490358	1089	363	34	0	27	14	19	49	1	14	19	23	5	32	5	13	12	16	22	26	2	29	37.082	0.832	3	3	3	3	3	3	362	2	11	0.314587	0	3.2e-05	3.2e-05	261
MALTptspp_b1621	76	0.0474229	0.741388	0	78	128	142	183	0.561205	0.408663	0.612053	1593	531	48	7	14	13	35	56	13	45	17	64	18	20	24	17	15	30	30	50	7	7	43.824	0.648	3	3	2	1	1	1	530	0	0	0	0	0	0	0
3HPPtex_b0929	44	1.53858	2.15677	0	56	129	52	126	0.556474	0.385675	0.490358	1089	363	34	0	27	14	19	49	1	14	19	23	5	32	5	13	12	16	22	26	2	29	37.082	0.832	3	3	3	3	3	3	362	16	11	0.316865	3.5e-05	0.000181	0.000181	261
ARBtex_b1377	49	0.0274733	0.683685	1	68	140	60	110	0.550265	0.399471	0.449735	1134	378	42	0	37	12	19	43	5	9	17	27	9	33	5	14	11	21	24	17	5	27	40.354	0.74	3	3	3	3	3	3	377	0	0	0	0	0	0	0
NADH16pp_b2284	453	0.0419157	1.10729	0	74	90	142	140	0.605381	0.44843	0.632287	1338	446	38	9	17	38	19	48	7	22	25	48	12	20	25	10	28	19	23	16	10	11	40.823	0.72	0	0	0	0	0	0	445	1	10	0.295894	0	2.13e-05	2.13e-05	302
ACSERtex_b1377	49	0.0274733	0.683685	1	68	140	60	110	0.550265	0.399471	0.449735	1134	378	42	0	37	12	19	43	5	9	17	27	9	33	5	14	11	21	24	17	5	27	40.354	0.74	3	3	3	3	3	3	377	5	11	0.315559	3.1e-06	6.4e-05	6.4e-05	261
SADT2_b2751	312	0.481837	1.83459	12	72	123	149	132	0.655462	0.392857	0.590336	1428	476	39	2	34	32	16	36	10	27	14	54	8	17	18	25	32	28	28	39	4	12	41.191	0.665	0	0	0	0	0	0	475	168	10	0.375767	0.000641	0.00180367	0.00180367	91
MLTGY3pp_b4392	179	0.221985	0.815667	0	99	160	228	159	0.592879	0.444272	0.599071	1938	646	74	3	32	39	17	36	3	24	28	57	22	31	29	43	49	37	38	34	20	29	46.125	0.602	0	0	0	0	0	0	645	0	0	0	0	0	0	214
FE3DHBZStonex_b3006	291	0.0244404	0.964254	0	41	65	67	72	0.616327	0.408163	0.567347	735	245	33	1	9	12	11	21	3	16	8	28	6	12	4	14	14	15	9	22	3	3	44.038	0.658	0	0	0	0	0	0	244	0	0	0	0	0	0	0
GLYC2Pabcpp_b3453	108	0.119204	1.28774	0	68	83	151	137	0.544419	0.410023	0.656036	1317	439	47	2	23	27	20	36	5	14	37	33	14	23	24	21	11	25	27	20	8	21	40.497	0.679	0	0	0	0	0	0	438	0	0	0	0	0	0	0
LALALGLUtpp_b0709	31	0.0416715	1.01749	0	65	123	161	145	0.544534	0.408907	0.619433	1482	494	55	8	10	15	28	45	7	37	14	66	19	18	12	14	18	31	21	38	12	25	45.422	0.654	1	1	1	1	1	1	493	0	0	0	0	0	0	0
3CMPtex_b0929	44	1.53858	2.15677	0	56	129	52	126	0.556474	0.385675	0.490358	1089	363	34	0	27	14	19	49	1	14	19	23	5	32	5	13	12	16	22	26	2	29	37.082	0.832	3	3	3	3	3	3	362	0	0	0	0	0	0	0
NTPP2_b0099	151	0.161707	0.5753	0	32	34	45	19	0.630769	0.353846	0.492308	390	130	9	0	4	18	7	10	3	9	8	11	4	6	9	5	7	2	4	7	5	1	43.556	0.572	0	0	0	0	0	0	129	1	11	0.246132	0	2.13e-05	2.13e-05	91
G3PD5_b2241	75	21.961	221.894	6	85	140	135	183	0.661142	0.473297	0.585635	1629	543	59	14	32	36	9	46	14	37	14	54	8	18	21	17	48	26	36	39	6	8	43.998	0.662	0	0	0	0	0	0	542	0	0	0	0	0	0	128
TTRCYCtpp_b0462	199	0.307416	1.82526	0	134	248	363	305	0.584762	0.398095	0.63619	3150	1050	105	2	47	50	54	89	11	72	43	102	42	39	45	48	38	62	67	97	9	27	40.532	0.702	2	2	2	2	2	2	1049	1	1	1	0	2.13e-05	2.13e-05	326
PUNP6_b2407	245	0.149857	0.85186	2	45	81	86	66	0.597122	0.406475	0.546763	834	278	27	6	11	16	16	27	8	17	12	27	10	10	13	8	11	15	13	24	0	6	47.137	0.604	0	0	0	0	0	0	277	4	12	0.197932	0.000831	5.34e-05	5.34e-05	30
PPAKr_b3115	225	0.0674756	0.421637	0	86	132	85	100	0.57072	0.419355	0.459057	1209	403	39	5	17	29	13	37	17	28	9	40	11	22	11	9	22	38	14	30	3	8	46.301	0.589	1	1	1	1	1	1	402	2	2	0.75	0	3.2e-05	3.2e-05	15
TRDR_b0888	636	0.242758	1.03257	1	48	87	72	115	0.608696	0.419255	0.580745	966	322	32	4	18	22	10	35	10	22	12	29	8	18	9	10	16	13	25	18	1	9	44.963	0.713	0	0	0	0	0	0	321	32	10	0.31491	0.00352053	0.000352	0.000352	261
S7PI_b0222	307	0.0677499	0.589004	0	28	54	44	67	0.57513	0.378238	0.57513	579	193	22	3	12	13	7	19	7	20	11	13	5	10	3	4	10	10	6	12	0	5	37.106	0.736	0	0	0	0	0	0	192	84	10	0.320597	0.000154	0.000907	0.000907	306
RNTR3c2_b3924	118	0.00451925	0.685642	0	59	46	76	68	0.62249	0.405622	0.578313	747	249	19	2	12	17	7	17	7	7	12	32	8	6	14	11	14	12	19	20	4	8	46.934	0.553	0	0	0	0	0	0	248	2	10	0.311546	1.05e-06	3.2e-05	3.2e-05	302
LPLIPAL1G161pp_b0494	210	0.032285	0.623363	0	31	51	67	60	0.593301	0.382775	0.607656	627	209	22	0	12	7	11	10	4	7	8	29	7	11	14	17	11	11	6	10	6	5	46.887	0.587	0	0	0	0	0	0	208	2	10	0.179883	0	3.2e-05	3.2e-05	198
CBL1tonex_b3006	291	0.0244404	0.964254	0	41	65	67	72	0.616327	0.408163	0.567347	735	245	33	1	9	12	11	21	3	16	8	28	6	12	4	14	14	15	9	22	3	3	44.038	0.658	0	0	0	0	0	0	244	350	9	0.427127	0.00299896	0.00374608	0.00374608	306
SPMDabcpp_b1125	146	0.0730815	0.83673	0	24	67	102	83	0.518116	0.336957	0.67029	828	276	16	2	9	6	18	16	2	27	12	55	12	9	15	2	10	12	15	22	6	9	42.856	0.626	3	3	2	1	1	1	275	1	13	0.19389	0	2.13e-05	2.13e-05	306
XTSNtex_b2215	64	0.0280042	1.90111	9	51	107	58	152	0.570652	0.377717	0.570652	1104	368	29	0	32	11	19	48	1	10	17	27	4	32	4	21	13	17	24	25	4	29	29.032	0.898	3	3	3	3	3	3	367	4	11	0.314991	1.12e-06	5.34e-05	5.34e-05	261
ASCBtex_b2215	64	0.0280042	1.90111	9	51	107	58	152	0.570652	0.377717	0.570652	1104	368	29	0	32	11	19	48	1	10	17	27	4	32	4	21	13	17	24	25	4	29	29.032	0.898	3	3	3	3	3	3	367	0	0	0	0	0	0	0
CLtex_b2215	64	0.0280042	1.90111	9	51	107	58	152	0.570652	0.377717	0.570652	1104	368	29	0	32	11	19	48	1	10	17	27	4	32	4	21	13	17	24	25	4	29	29.032	0.898	3	3	3	3	3	3	367	336	9	0.424022	0.000798	0.00359666	0.00359666	91
DKGLCNR1_b3012	239	0.474531	1.31244	1	61	52	63	100	0.612319	0.336957	0.59058	828	276	19	1	20	17	6	20	9	21	21	29	5	11	13	18	11	10	11	19	8	6	47.342	0.615	1	1	1	1	1	1	275	0	0	0	0	0	0	0
RIBtex_b0241	57	0.045701	0.726706	0	70	118	72	92	0.502841	0.372159	0.465909	1056	352	31	0	31	14	21	37	1	14	25	23	9	27	3	17	12	21	24	16	3	22	46.295	0.669	3	3	3	3	3	3	351	0	0	0	0	0	0	0
MAN6Ptex_b0929	44	1.53858	2.15677	0	56	129	52	126	0.556474	0.385675	0.490358	1089	363	34	0	27	14	19	49	1	14	19	23	5	32	5	13	12	16	22	26	2	29	37.082	0.832	3	3	3	3	3	3	362	0	0	0	0	0	0	0
MLTGY1pp_b4392	179	0.221985	0.815667	0	99	160	228	159	0.592879	0.444272	0.599071	1938	646	74	3	32	39	17	36	3	24	28	57	22	31	29	43	49	37	38	34	20	29	46.125	0.602	0	0	0	0	0	0	645	0	0	0	0	0	0	212
S2FE2SS2_b1682	500	0.417541	0.719378	0	46	60	72	71	0.60241	0.337349	0.574297	747	249	13	1	20	19	10	23	5	14	14	30	6	6	8	12	12	16	10	20	1	8	46.969	0.566	1	1	1	0	0	0	248	272	9	0.398115	0.000782	0.00291362	0.00291362	91
ETHSO3tex_b1377	49	0.0274733	0.683685	1	68	140	60	110	0.550265	0.399471	0.449735	1134	378	42	0	37	12	19	43	5	9	17	27	9	33	5	14	11	21	24	17	5	27	40.354	0.74	3	3	3	3	3	3	377	0	0	0	0	0	0	0
ACKr_b1849	182	0.521153	1.13449	0	74	123	100	96	0.689567	0.424936	0.498728	1179	393	45	5	18	30	13	35	9	21	11	38	9	6	17	21	27	20	16	41	2	8	47.389	0.598	0	0	0	0	0	0	392	1	1	1	0	2.13e-05	2.13e-05	16
RIBtex_b0929	44	1.53858	2.15677	0	56	129	52	126	0.556474	0.385675	0.490358	1089	363	34	0	27	14	19	49	1	14	19	23	5	32	5	13	12	16	22	26	2	29	37.082	0.832	3	3	3	3	3	3	362	0	0	0	0	0	0	0
FECRMabcpp_b0153	61	0.0508808	1.02038	0	66	131	322	142	0.614221	0.476551	0.701967	1983	661	86	6	15	7	25	62	8	43	5	124	31	9	32	22	35	35	38	51	21	5	45.58	0.574	3	3	3	3	3	2	660	8	11	0.315072	3.39e-07	9.61e-05	9.61e-05	261
FLDR2_b3924	118	0.00451925	0.685642	0	59	46	76	68	0.62249	0.405622	0.578313	747	249	19	2	12	17	7	17	7	7	12	32	8	6	14	11	14	12	19	20	4	8	46.934	0.553	0	0	0	0	0	0	248	0	0	0	0	0	0	119
DOPAtex_b0929	44	1.53858	2.15677	0	56	129	52	126	0.556474	0.385675	0.490358	1089	363	34	0	27	14	19	49	1	14	19	23	5	32	5	13	12	16	22	26	2	29	37.082	0.832	3	3	3	3	3	3	362	0	0	0	0	0	0	0
PROtex_b0241	57	0.045701	0.726706	0	70	118	72	92	0.502841	0.372159	0.465909	1056	352	31	0	31	14	21	37	1	14	25	23	9	27	3	17	12	21	24	16	3	22	46.295	0.669	3	3	3	3	3	3	351	3	11	0.315072	0.00124322	4.27e-05	4.27e-05	261
SO4tex_b2215	64	0.0280042	1.90111	9	51	107	58	152	0.570652	0.377717	0.570652	1104	368	29	0	32	11	19	48	1	10	17	27	4	32	4	21	13	17	24	25	4	29	29.032	0.898	3	3	3	3	3	3	367	165	10	0.374732	0.000184	0.00177165	0.00177165	91
ARGabcpp_b0862	58	0.0116115	0.619001	0	27	59	98	55	0.585774	0.422594	0.640167	717	239	27	2	6	7	14	15	1	16	6	38	7	5	10	11	11	17	12	20	7	6	45.985	0.604	0	0	0	0	0	0	238	1	13	0.195002	0	2.13e-05	2.13e-05	261
CYTDtex_b0241	57	0.045701	0.726706	0	70	118	72	92	0.502841	0.372159	0.465909	1056	352	31	0	31	14	21	37	1	14	25	23	9	27	3	17	12	21	24	16	3	22	46.295	0.669	3	3	3	3	3	3	351	3	11	0.31491	0.000829	4.27e-05	4.27e-05	261
PSERtex_b2215	64	0.0280042	1.90111	9	51	107	58	152	0.570652	0.377717	0.570652	1104	368	29	0	32	11	19	48	1	10	17	27	4	32	4	21	13	17	24	25	4	29	29.032	0.898	3	3	3	3	3	3	367	0	0	0	0	0	0	0
G6Ptex_b1377	49	0.0274733	0.683685	1	68	140	60	110	0.550265	0.399471	0.449735	1134	378	42	0	37	12	19	43	5	9	17	27	9	33	5	14	11	21	24	17	5	27	40.354	0.74	3	3	3	3	3	3	377	0	0	0	0	0	0	0
CYNTtex_b1377	49	0.0274733	0.683685	1	68	140	60	110	0.550265	0.399471	0.449735	1134	378	42	0	37	12	19	43	5	9	17	27	9	33	5	14	11	21	24	17	5	27	40.354	0.74	3	3	3	3	3	3	377	0	0	0	0	0	0	0
GLCUR1Ptex_b1377	49	0.0274733	0.683685	1	68	140	60	110	0.550265	0.399471	0.449735	1134	378	42	0	37	12	19	43	5	9	17	27	9	33	5	14	11	21	24	17	5	27	40.354	0.74	3	3	3	3	3	3	377	0	0	0	0	0	0	0
MLTGY1pp_b2813	109	0.289572	0.649107	0	52	111	103	100	0.601093	0.428962	0.554645	1098	366	32	1	18	15	17	41	8	18	16	23	11	20	20	20	22	23	11	24	6	19	42.004	0.691	0	0	0	0	0	0	365	0	0	0	0	0	0	212
ACtex_b0929	44	1.53858	2.15677	0	56	129	52	126	0.556474	0.385675	0.490358	1089	363	34	0	27	14	19	49	1	14	19	23	5	32	5	13	12	16	22	26	2	29	37.082	0.832	3	3	3	3	3	3	362	3	11	0.31491	0.000829	4.27e-05	4.27e-05	261
SULRi_b2764	146	0.545857	2.14267	8	108	128	174	190	0.661667	0.413333	0.606667	1800	600	71	2	36	49	22	36	9	21	26	61	8	23	32	28	34	31	31	51	11	17	43.616	0.656	0	0	0	0	0	0	599	168	10	0.375767	0.000641	0.00180367	0.00180367	91
F6PA_b3946	38	0.000990357	0.425688	0	54	48	65	54	0.633484	0.429864	0.538462	663	221	32	2	9	17	5	15	3	16	10	24	6	5	10	10	9	10	15	16	2	4	47.374	0.619	1	1	1	1	1	1	220	0	0	0	0	0	0	99
3PEPTtex_b1377	49	0.0274733	0.683685	1	68	140	60	110	0.550265	0.399471	0.449735	1134	378	42	0	37	12	19	43	5	9	17	27	9	33	5	14	11	21	24	17	5	27	40.354	0.74	3	3	3	3	3	3	377	13	11	0.32186	3.28e-05	0.000149	0.000149	306
2DGULRGy_b3553	279	0.313369	1.12824	0	76	69	82	98	0.621538	0.384615	0.553846	975	325	40	4	18	22	11	19	14	15	13	36	10	15	13	11	14	14	19	28	2	6	50.321	0.588	0	0	0	0	0	0	324	0	0	0	0	0	0	0
AP4AH_b0049	224	0.15554	0.754554	0	47	63	97	74	0.629893	0.434164	0.608541	843	281	24	6	20	18	11	23	7	9	13	37	6	8	19	7	15	14	13	13	8	9	45.327	0.648	0	0	0	0	0	0	280	1	1	1	0	2.13e-05	2.13e-05	40
ATPS4rpp_b3733	378	0.149157	1.44283	7	41	59	91	97	0.579861	0.371528	0.652778	864	288	27	2	17	15	4	20	4	13	23	29	13	12	9	14	13	21	13	25	2	11	40.012	0.71	0	0	0	0	0	0	287	0	0	0	0	0	0	60
ACNAMtex_b4311	36	0.0767759	0.65298	1	57	82	45	55	0.481172	0.389121	0.41841	717	239	14	1	18	8	7	15	7	9	14	18	5	17	5	10	14	19	15	13	10	19	53.942	0.544	0	0	0	0	0	0	238	0	0	0	0	0	0	0
LALADGLUtpp_b0709	31	0.0416715	1.01749	0	65	123	161	145	0.544534	0.408907	0.619433	1482	494	55	8	10	15	28	45	7	37	14	66	19	18	12	14	18	31	21	38	12	25	45.422	0.654	1	1	1	1	1	1	493	0	0	0	0	0	0	0
FE3tex_b2215	64	0.0280042	1.90111	9	51	107	58	152	0.570652	0.377717	0.570652	1104	368	29	0	32	11	19	48	1	10	17	27	4	32	4	21	13	17	24	25	4	29	29.032	0.898	3	3	3	3	3	3	367	0	0	0	0	0	0	118
TDSR1_b4136	108	0.141265	0.553314	0	98	122	177	169	0.59894	0.422261	0.611307	1698	566	62	8	21	15	32	44	9	29	16	79	14	13	31	43	19	24	39	40	11	16	46.635	0.563	0	0	0	0	0	0	565	0	0	0	0	0	0	0
CYSDtex_b0929	44	1.53858	2.15677	0	56	129	52	126	0.556474	0.385675	0.490358	1089	363	34	0	27	14	19	49	1	14	19	23	5	32	5	13	12	16	22	26	2	29	37.082	0.832	3	3	3	3	3	3	362	0	0	0	0	0	0	0
MDDEP2pp_b2328	93	0.124253	0.670888	0	47	69	86	73	0.621818	0.461818	0.578182	825	275	21	6	17	8	9	20	9	13	13	30	7	5	24	19	15	20	15	15	6	2	49.134	0.591	0	0	0	0	0	0	274	15	11	0.255688	5.82e-07	0.000171	0.000171	306
URItex_b0411	49	0.0397702	1.70132	0	35	76	63	121	0.491525	0.4	0.623729	885	295	20	0	23	9	19	31	7	13	13	19	6	26	8	8	9	21	14	13	14	21	35.71	0.816	0	0	0	0	0	0	294	3	11	0.31491	0.000829	4.27e-05	4.27e-05	261
MDDEP4pp_b2328	93	0.124253	0.670888	0	47	69	86	73	0.621818	0.461818	0.578182	825	275	21	6	17	8	9	20	9	13	13	30	7	5	24	19	15	20	15	15	6	2	49.134	0.591	0	0	0	0	0	0	274	11	11	0.251799	0	0.000128	0.000128	306
RNDR4_b3781	625	0.0391972	0.941381	0	20	26	31	33	0.581818	0.363636	0.581818	330	110	12	2	11	5	4	9	1	9	10	13	2	4	5	3	1	3	6	5	2	2	38.428	0.781	1	1	1	1	1	0	109	2	11	0.24029	1.58e-05	3.2e-05	3.2e-05	261
RNDR4b_b2676	109	0.423921	0.68852	0	60	80	91	89	0.525	0.359375	0.5625	960	320	28	2	21	24	16	12	5	16	17	37	9	18	14	12	10	25	15	15	8	15	51.71	0.602	0	0	0	0	0	0	319	3	12	0.210012	1.53e-05	4.27e-05	4.27e-05	261
FHL_b2721	66	0.042546	0.990525	0	57	119	182	212	0.626316	0.389474	0.691228	1710	570	33	8	37	39	19	42	15	24	24	55	21	22	31	16	45	24	31	48	8	27	36.118	0.769	1	1	1	1	1	1	569	6	12	0.241284	0.00743898	7.47e-05	7.47e-05	261
GUAtex_b0411	49	0.0397702	1.70132	0	35	76	63	121	0.491525	0.4	0.623729	885	295	20	0	23	9	19	31	7	13	13	19	6	26	8	8	9	21	14	13	14	21	35.71	0.816	0	0	0	0	0	0	294	3	11	0.31491	0.000829	4.27e-05	4.27e-05	261
12PPDRtex_b1377	49	0.0274733	0.683685	1	68	140	60	110	0.550265	0.399471	0.449735	1134	378	42	0	37	12	19	43	5	9	17	27	9	33	5	14	11	21	24	17	5	27	40.354	0.74	3	3	3	3	3	3	377	7	11	0.314991	6.79e-07	8.54e-05	8.54e-05	261
DOXRBCNtpp_b2470	115	0.163002	1.06518	1	148	234	351	305	0.593449	0.408478	0.631985	3114	1038	107	4	47	47	50	81	11	56	35	110	40	42	43	55	47	67	64	90	11	30	46.359	0.628	2	2	2	2	2	2	1037	1	1	1	0	2.13e-05	2.13e-05	92
23CAMPtex_b2215	64	0.0280042	1.90111	9	51	107	58	152	0.570652	0.377717	0.570652	1104	368	29	0	32	11	19	48	1	10	17	27	4	32	4	21	13	17	24	25	4	29	29.032	0.898	3	3	3	3	3	3	367	0	0	0	0	0	0	0
LDH_D_b2133	84	0.228434	0.909426	1	90	141	168	173	0.604895	0.365385	0.596154	1716	572	44	6	43	37	26	43	24	25	37	58	14	22	24	19	33	26	28	34	5	23	43.753	0.648	0	0	0	0	0	0	571	0	0	0	0	0	0	194
G3PD7_b2241	75	21.961	221.894	6	85	140	135	183	0.661142	0.473297	0.585635	1629	543	59	14	32	36	9	46	14	37	14	54	8	18	21	17	48	26	36	39	6	8	43.998	0.662	0	0	0	0	0	0	542	1	15	0.140369	0	2.13e-05	2.13e-05	261
H2Stex_b2215	64	0.0280042	1.90111	9	51	107	58	152	0.570652	0.377717	0.570652	1104	368	29	0	32	11	19	48	1	10	17	27	4	32	4	21	13	17	24	25	4	29	29.032	0.898	3	3	3	3	3	3	367	2	1	1	0	3.2e-05	3.2e-05	172
IGPS_b1262	492	0.472053	1.64355	0	79	119	135	121	0.632159	0.387665	0.563877	1362	454	59	7	29	23	16	31	11	25	18	49	6	18	14	29	23	25	14	37	3	16	48.376	0.604	0	0	0	0	0	0	453	163	10	0.374962	5.31e-05	0.0017503	0.0017503	91
ASPabcpp_b0654	88	0.064993	0.614008	0	27	61	90	69	0.526316	0.404858	0.643725	741	247	24	3	4	8	16	17	1	19	7	33	11	11	12	10	10	13	13	18	8	8	44.177	0.625	0	0	0	0	0	0	246	0	0	0	0	0	0	51
UDPGDC_b2255	47	0.093411	1.29715	0	115	195	161	190	0.600605	0.402421	0.531014	1983	661	53	11	35	43	28	48	27	52	25	63	9	28	35	20	45	36	27	42	10	23	44.311	0.625	0	0	0	0	0	0	660	64	11	0.334334	0.000232	0.000694	0.000694	306
AMALT4_b3416	90	0.0488311	0.657184	0	110	156	263	166	0.61295	0.42446	0.617266	2085	695	68	11	43	41	16	48	17	22	36	74	22	21	38	35	40	35	33	40	22	32	44.234	0.619	0	0	0	0	0	0	694	0	0	0	0	0	0	0
CAT_b1732	302	0.514381	1.68723	0	137	218	178	221	0.623342	0.409814	0.529178	2262	754	64	2	58	49	40	53	28	43	37	60	12	33	59	26	44	40	37	40	9	19	46.725	0.642	0	0	0	0	0	0	753	1	11	0.314506	0	2.13e-05	2.13e-05	261
ECOAH2_b3846	59	0.0262198	1.63496	4	132	143	208	247	0.643836	0.389041	0.623288	2190	730	82	5	44	50	30	62	11	37	54	74	21	24	40	24	31	26	30	58	8	18	39.202	0.724	1	1	1	1	1	1	729	7	1	1	0	8.54e-05	8.54e-05	173
NMNPtpp_b0751	47	0.34523	1.21051	1	35	58	84	63	0.475	0.358333	0.6125	720	240	21	3	4	8	17	14	2	26	4	31	11	10	7	10	8	17	7	22	9	8	52.154	0.583	0	0	0	0	0	0	239	0	0	0	0	0	0	0
CYTBO3_4pp_b0430	153	0.121661	1.56393	3	18	44	63	80	0.502439	0.404878	0.697561	615	205	18	3	6	5	17	20	11	15	4	24	11	5	3	2	5	11	17	15	6	6	36.05	0.753	0	0	0	0	0	0	204	1	10	0.295894	0	2.13e-05	2.13e-05	302
CU2abcpp_b3469	302	0.316471	1.06124	0	130	151	250	202	0.656207	0.474761	0.616644	2199	733	119	9	28	47	18	59	9	45	25	91	13	21	30	26	41	35	49	55	6	6	46.137	0.614	0	0	0	0	0	0	732	1	11	0.245737	0	2.13e-05	2.13e-05	91
CUtex_b1377	49	0.0274733	0.683685	1	68	140	60	110	0.550265	0.399471	0.449735	1134	378	42	0	37	12	19	43	5	9	17	27	9	33	5	14	11	21	24	17	5	27	40.354	0.74	3	3	3	3	3	3	377	0	0	0	0	0	0	0
FDH5pp_b1475	74	0.120617	0.48701	0	33	69	93	100	0.579661	0.416949	0.654237	885	295	26	17	19	21	7	25	11	19	20	17	6	11	15	9	10	13	13	21	4	10	42.637	0.695	2	2	2	2	2	1	294	1	11	0.228715	0	2.13e-05	2.13e-05	302
PHEtex_b0929	44	1.53858	2.15677	0	56	129	52	126	0.556474	0.385675	0.490358	1089	363	34	0	27	14	19	49	1	14	19	23	5	32	5	13	12	16	22	26	2	29	37.082	0.832	3	3	3	3	3	3	362	5	11	0.31491	0	6.4e-05	6.4e-05	261
GLYCAtex_b1377	49	0.0274733	0.683685	1	68	140	60	110	0.550265	0.399471	0.449735	1134	378	42	0	37	12	19	43	5	9	17	27	9	33	5	14	11	21	24	17	5	27	40.354	0.74	3	3	3	3	3	3	377	3	11	0.314667	0	4.27e-05	4.27e-05	261
THD2pp_b1603	293	0.642394	1.27744	0	107	120	156	128	0.594912	0.422701	0.555773	1533	511	63	5	18	31	23	42	4	37	26	42	16	18	24	21	18	27	30	50	7	8	46.49	0.63	0	0	0	0	0	0	510	0	0	0	0	0	0	312
NTP11_b4394	97	0.355202	1.0235	0	22	53	49	47	0.649123	0.473684	0.561404	513	171	24	2	4	15	7	15	5	12	4	10	2	5	8	6	11	11	8	16	2	3	50.434	0.611	0	0	0	0	0	0	170	0	0	0	0	0	0	0
EDTXS3_b2378	48	0.438777	1.11023	0	61	77	83	86	0.566775	0.42671	0.550489	921	307	23	4	7	20	17	24	5	11	14	27	19	13	15	11	28	14	13	20	10	11	50.061	0.605	1	1	1	1	1	1	306	13	11	0.318844	8.5e-06	0.000149	0.000149	306
AMPtex_b0929	44	1.53858	2.15677	0	56	129	52	126	0.556474	0.385675	0.490358	1089	363	34	0	27	14	19	49	1	14	19	23	5	32	5	13	12	16	22	26	2	29	37.082	0.832	3	3	3	3	3	3	362	1	1	1	0	2.13e-05	2.13e-05	299
SERtex_b0241	57	0.045701	0.726706	0	70	118	72	92	0.502841	0.372159	0.465909	1056	352	31	0	31	14	21	37	1	14	25	23	9	27	3	17	12	21	24	16	3	22	46.295	0.669	3	3	3	3	3	3	351	5	11	0.315559	3.1e-06	6.4e-05	6.4e-05	261
ECOAH1_b3846	59	0.0262198	1.63496	4	132	143	208	247	0.643836	0.389041	0.623288	2190	730	82	5	44	50	30	62	11	37	54	74	21	24	40	24	31	26	30	58	8	18	39.202	0.724	1	1	1	1	1	1	729	7	1	1	0	8.54e-05	8.54e-05	173
CHORM_b2600	124	0.166923	0.968224	1	61	112	133	68	0.668449	0.363636	0.537433	1122	374	35	3	22	28	14	24	9	19	15	47	11	8	17	22	27	20	5	32	5	10	46.168	0.601	1	0	0	0	0	0	373	160	10	0.326406	1.52e-05	0.00171829	0.00171829	91
TYRtex_b1377	49	0.0274733	0.683685	1	68	140	60	110	0.550265	0.399471	0.449735	1134	378	42	0	37	12	19	43	5	9	17	27	9	33	5	14	11	21	24	17	5	27	40.354	0.74	3	3	3	3	3	3	377	5	11	0.315072	2.59e-06	6.4e-05	6.4e-05	261
4PEPTtex_b2215	64	0.0280042	1.90111	9	51	107	58	152	0.570652	0.377717	0.570652	1104	368	29	0	32	11	19	48	1	10	17	27	4	32	4	21	13	17	24	25	4	29	29.032	0.898	3	3	3	3	3	3	367	37	11	0.325798	0.00130784	0.000406	0.000406	306
NTD4_b2744	420	0.227363	0.722778	0	37	82	73	62	0.637795	0.472441	0.531496	762	254	24	5	21	6	5	25	7	14	5	23	4	11	17	9	15	14	17	23	3	5	42.933	0.589	0	0	0	0	0	0	253	0	0	0	0	0	0	247
FUMt2_3pp_b4123	82	0.0966133	0.659513	0	58	116	141	132	0.561521	0.395973	0.610738	1341	447	48	5	15	12	23	38	6	50	16	53	16	10	22	10	12	27	19	43	6	15	42.419	0.685	1	1	1	1	1	1	446	0	0	0	0	0	0	0
CHLabcpp_b2130	98	0.126125	0.74048	0	45	89	168	84	0.629534	0.440415	0.65285	1158	386	52	5	10	3	17	32	5	26	6	76	8	8	18	15	16	18	17	36	11	6	45.916	0.573	0	0	0	0	0	0	385	0	0	0	0	0	0	0
FACOAL140t2pp_b1701	35	0.233017	0.883692	1	125	158	141	125	0.582878	0.420765	0.484517	1647	549	53	15	30	33	20	35	13	28	27	63	13	13	27	23	30	31	32	38	8	16	48.624	0.556	0	0	0	0	0	0	548	17	11	0.160424	0.010149	0.000192	0.000192	197
NTD6_b2291	94	0.0518436	0.646284	0	43	47	60	50	0.605	0.325	0.55	600	200	23	2	10	19	9	4	7	10	12	25	7	9	7	9	10	13	5	11	1	6	49.861	0.613	0	0	0	0	0	0	199	1	10	0.295894	0	2.13e-05	2.13e-05	302
GMHEPAT_b3052	316	0.0899545	0.851796	0	85	106	160	127	0.656904	0.414226	0.600418	1434	478	51	4	25	36	12	43	5	23	26	49	11	18	22	15	25	25	25	51	3	8	43.414	0.666	0	0	0	0	0	0	477	84	10	0.320597	0.000154	0.000907	0.000907	306
MELIBtex_b1377	49	0.0274733	0.683685	1	68	140	60	110	0.550265	0.399471	0.449735	1134	378	42	0	37	12	19	43	5	9	17	27	9	33	5	14	11	21	24	17	5	27	40.354	0.74	3	3	3	3	3	3	377	0	0	0	0	0	0	0
O16AP1pp_b2027	79	0.0719922	0.874116	1	70	97	108	52	0.562691	0.324159	0.489297	981	327	29	0	19	20	4	17	3	27	19	37	8	18	11	31	15	15	17	23	2	11	48.623	0.559	0	0	0	0	0	0	326	0	0	0	0	0	0	0
NI2uabcpp_b3478	23	0.14593	0.830089	0	20	49	122	87	0.640288	0.435252	0.751799	834	278	29	1	13	3	13	22	11	18	0	45	13	4	10	8	16	20	14	25	9	3	35.857	0.641	3	3	3	3	3	3	277	0	0	0	0	0	0	240
PLIPA2A181pp_b3821	101	0.0282509	0.656571	0	38	73	92	87	0.524138	0.396552	0.617241	870	290	18	0	16	15	10	23	5	9	10	29	8	20	13	12	13	19	18	18	10	23	46.721	0.641	0	0	0	0	0	0	289	2	10	0.174576	0	3.2e-05	3.2e-05	198
Ktex_b1377	49	0.0274733	0.683685	1	68	140	60	110	0.550265	0.399471	0.449735	1134	378	42	0	37	12	19	43	5	9	17	27	9	33	5	14	11	21	24	17	5	27	40.354	0.74	3	3	3	3	3	3	377	336	9	0.424022	0.000798	0.00359666	0.00359666	91
H2O2tex_b1377	49	0.0274733	0.683685	1	68	140	60	110	0.550265	0.399471	0.449735	1134	378	42	0	37	12	19	43	5	9	17	27	9	33	5	14	11	21	24	17	5	27	40.354	0.74	3	3	3	3	3	3	377	0	0	0	0	0	0	0
PGPP160_b1278	82	0.0324914	0.618938	0	72	65	75	43	0.588235	0.466667	0.462745	765	255	29	2	3	15	11	15	6	16	10	32	5	3	13	11	18	10	15	21	17	2	55.788	0.485	0	0	0	0	0	0	254	2	10	0.306787	0	3.2e-05	3.2e-05	306
ASNtex_b2215	64	0.0280042	1.90111	9	51	107	58	152	0.570652	0.377717	0.570652	1104	368	29	0	32	11	19	48	1	10	17	27	4	32	4	21	13	17	24	25	4	29	29.032	0.898	3	3	3	3	3	3	367	3	11	0.315072	0.000669	4.27e-05	4.27e-05	261
GTPtex_b1377	49	0.0274733	0.683685	1	68	140	60	110	0.550265	0.399471	0.449735	1134	378	42	0	37	12	19	43	5	9	17	27	9	33	5	14	11	21	24	17	5	27	40.354	0.74	3	3	3	3	3	3	377	0	0	0	0	0	0	0
PGLYCP_b3385	114	0.0457765	0.943564	0	46	73	74	60	0.664032	0.391304	0.529644	759	253	28	1	21	16	8	21	3	12	11	29	6	9	18	11	11	8	10	19	2	8	50.445	0.624	0	0	0	0	0	0	252	0	0	0	0	0	0	0
ECOAH5_b2341	124	0.0138785	1.06552	4	141	202	204	168	0.61958	0.427972	0.52028	2145	715	75	9	30	44	24	69	13	52	40	68	16	20	38	35	44	32	37	53	2	13	52.384	0.575	4	4	4	4	4	2	714	3	1	1	0	4.27e-05	4.27e-05	174
GTHRDabcpp_b0830	44	0.298345	0.938538	4	95	113	189	116	0.549708	0.423002	0.594542	1539	513	66	1	27	22	25	28	6	22	37	40	11	25	31	27	14	30	36	32	11	21	45.614	0.639	0	0	0	0	0	0	512	1	13	0.194785	0	2.13e-05	2.13e-05	261
ECOAH6_b2341	124	0.0138785	1.06552	4	141	202	204	168	0.61958	0.427972	0.52028	2145	715	75	9	30	44	24	69	13	52	40	68	16	20	38	35	44	32	37	53	2	13	52.384	0.575	4	4	4	4	4	2	714	2	1	1	0	3.2e-05	3.2e-05	95
PUNP3_b4384	173	0.156214	1.07229	0	38	61	46	95	0.591667	0.391667	0.5875	720	240	26	4	19	14	12	23	6	18	14	15	12	7	6	2	12	9	14	20	0	6	35.287	0.824	0	0	0	0	0	0	239	0	0	0	0	0	0	289
BUTSO3abcpp_b0934	131	0.143896	0.750857	0	32	55	111	66	0.560606	0.443182	0.670455	792	264	24	0	5	9	9	23	5	25	5	45	6	6	12	5	13	20	11	22	13	5	45.2	0.534	0	0	0	0	0	0	263	0	0	0	0	0	0	0
GLUabcpp_b0654	88	0.064993	0.614008	0	27	61	90	69	0.526316	0.404858	0.643725	741	247	24	3	4	8	16	17	1	19	7	33	11	11	12	10	10	13	13	18	8	8	44.177	0.625	0	0	0	0	0	0	246	0	0	0	0	0	0	145
NAMNPP_b0931	113	0.00297995	1.02841	4	64	122	105	110	0.620948	0.379052	0.53616	1203	401	35	5	31	21	21	18	15	17	18	46	8	9	16	24	28	26	16	26	8	12	50.306	0.631	0	0	0	0	0	0	400	6	11	0.246827	7.92e-07	7.47e-05	7.47e-05	241
RNDR1b_b3610	285	0.171768	0.710785	0	14	22	21	27	0.583333	0.416667	0.571429	252	84	8	3	6	5	2	7	2	6	6	8	2	2	4	3	5	4	4	3	0	3	38.071	0.722	1	1	1	0	0	0	83	2	13	0.194475	0	3.2e-05	3.2e-05	261
LCTStpp_b0343	29	0.135201	1.09537	0	62	131	110	115	0.476077	0.375598	0.538278	1254	418	35	8	6	11	56	36	4	33	12	54	14	16	12	11	12	29	19	29	6	14	47.188	0.632	0	0	0	0	0	0	417	1	1	1	0	2.13e-05	2.13e-05	193
DHBD_b0596	72	5.86509	59.0258	6	34	57	84	74	0.646586	0.457831	0.634538	747	249	35	2	15	11	12	26	2	11	8	21	6	7	5	18	12	14	17	20	3	3	47.773	0.628	1	1	1	1	1	1	248	32	10	0.309735	3.34e-05	0.000352	0.000352	306
5DGLCNt2rpp_b4265	57	0.238226	1.17862	1	76	126	116	122	0.552273	0.425	0.540909	1320	440	52	3	7	13	28	44	9	47	9	58	16	12	21	6	9	18	34	44	5	4	50.148	0.563	3	3	3	3	3	3	439	6	11	0.315234	0.000578	7.47e-05	7.47e-05	261
GLYBtex_b0929	44	1.53858	2.15677	0	56	129	52	126	0.556474	0.385675	0.490358	1089	363	34	0	27	14	19	49	1	14	19	23	5	32	5	13	12	16	22	26	2	29	37.082	0.832	3	3	3	3	3	3	362	0	0	0	0	0	0	0
PROt2rpp_b4111	86	0.0516556	0.801316	0	64	149	166	122	0.550898	0.387226	0.57485	1503	501	47	4	22	18	29	43	9	48	20	60	19	11	23	14	19	26	25	39	7	17	43.98	0.634	0	0	0	0	0	0	500	4	12	0.239867	0.00166103	5.34e-05	5.34e-05	261
GLCabcpp_b2149	119	0.0199856	1.12891	0	110	142	136	119	0.504931	0.353057	0.502959	1521	507	24	3	26	34	15	42	12	50	34	52	20	25	14	19	26	36	30	30	4	10	49.392	0.566	6	6	5	5	5	5	506	1	11	0.314506	0	2.13e-05	2.13e-05	261
FORtex_b1377	49	0.0274733	0.683685	1	68	140	60	110	0.550265	0.399471	0.449735	1134	378	42	0	37	12	19	43	5	9	17	27	9	33	5	14	11	21	24	17	5	27	40.354	0.74	3	3	3	3	3	3	377	4	10	0.346731	0.00032	5.34e-05	5.34e-05	302
ACMANAptspp_b2415	225	0.0245069	1.24341	4	18	22	22	24	0.593023	0.395349	0.534884	258	86	9	0	1	9	4	6	2	3	7	8	2	2	2	6	1	6	10	7	0	0	38.988	0.805	1	1	1	0	0	0	85	0	0	0	0	0	0	0
CBMKr_b2874	118	0.266597	1.76289	5	73	101	72	65	0.62701	0.405145	0.440514	933	311	38	2	15	24	8	29	5	23	20	26	8	10	11	14	13	16	15	27	2	4	45.336	0.67	2	2	2	2	2	2	310	0	0	0	0	0	0	61
ACtex_b1377	49	0.0274733	0.683685	1	68	140	60	110	0.550265	0.399471	0.449735	1134	378	42	0	37	12	19	43	5	9	17	27	9	33	5	14	11	21	24	17	5	27	40.354	0.74	3	3	3	3	3	3	377	3	11	0.31491	0.000829	4.27e-05	4.27e-05	261
BSORx_b3551	26	0.250602	0.861676	0	128	214	242	194	0.615681	0.456298	0.560411	2334	778	81	10	38	49	30	70	26	35	22	65	20	32	41	38	42	50	38	45	23	22	47.214	0.624	2	2	2	2	2	2	777	0	0	0	0	0	0	0
PLIPA1E161pp_b3821	101	0.0282509	0.656571	0	38	73	92	87	0.524138	0.396552	0.617241	870	290	18	0	16	15	10	23	5	9	10	29	8	20	13	12	13	19	18	18	10	23	46.721	0.641	0	0	0	0	0	0	289	5	8	0.268523	0.00149748	6.4e-05	6.4e-05	198
CYTBO3_4pp_b0432	143	0.0501062	1.62418	4	53	65	90	108	0.493671	0.408228	0.626582	948	316	34	1	12	16	17	19	9	20	20	24	16	14	18	9	7	27	15	19	8	10	49.509	0.666	0	0	0	0	0	0	315	1	10	0.295894	0	2.13e-05	2.13e-05	302
GPDDA2_b3449	105	0.110683	0.785986	0	38	49	90	71	0.612903	0.431452	0.649194	744	248	25	4	15	16	5	21	6	12	13	32	8	10	13	7	15	10	11	12	8	4	45.732	0.606	0	0	0	0	0	0	247	9	9	0.230653	0.0626134	0.000107	0.000107	198
NADH17pp_b2280	108	0.215491	0.849725	0	27	41	67	50	0.616216	0.367568	0.632432	555	185	22	1	4	11	9	16	4	19	5	25	6	4	5	4	6	9	6	20	2	6	42.168	0.659	0	0	0	0	0	0	184	0	0	0	0	0	0	224
MNtex_b0241	57	0.045701	0.726706	0	70	118	72	92	0.502841	0.372159	0.465909	1056	352	31	0	31	14	21	37	1	14	25	23	9	27	3	17	12	21	24	16	3	22	46.295	0.669	3	3	3	3	3	3	351	336	9	0.424022	0.000798	0.00359666	0.00359666	91
DHAtex_b0241	57	0.045701	0.726706	0	70	118	72	92	0.502841	0.372159	0.465909	1056	352	31	0	31	14	21	37	1	14	25	23	9	27	3	17	12	21	24	16	3	22	46.295	0.669	3	3	3	3	3	3	351	3	11	0.314667	0	4.27e-05	4.27e-05	261
ILEtex_b0929	44	1.53858	2.15677	0	56	129	52	126	0.556474	0.385675	0.490358	1089	363	34	0	27	14	19	49	1	14	19	23	5	32	5	13	12	16	22	26	2	29	37.082	0.832	3	3	3	3	3	3	362	17	11	0.317358	0.000844	0.000192	0.000192	261
PAPSR_b2762	103	0.398466	1.62403	9	57	53	69	66	0.604082	0.367347	0.55102	735	245	19	1	13	23	7	17	5	12	15	32	3	12	10	9	15	9	12	13	7	10	45.243	0.651	0	0	0	0	0	0	244	28	10	0.359871	4e-05	0.00031	0.00031	91
NODOy_b2552	145	0.351652	1.04752	0	78	95	109	115	0.619647	0.390428	0.564232	1191	397	43	2	20	29	21	32	13	16	21	34	10	18	21	20	15	15	21	27	6	12	42.697	0.704	0	0	0	0	0	0	396	0	0	0	0	0	0	0
LPLIPAL2A140_b3825	63	0.201587	0.617796	0	60	99	89	93	0.648094	0.431085	0.533724	1023	341	33	3	23	18	21	26	16	18	5	26	8	10	17	14	36	11	14	24	7	10	54.742	0.58	0	0	0	0	0	0	340	3	12	0.138293	0	4.27e-05	4.27e-05	197
SELtex_b2215	64	0.0280042	1.90111	9	51	107	58	152	0.570652	0.377717	0.570652	1104	368	29	0	32	11	19	48	1	10	17	27	4	32	4	21	13	17	24	25	4	29	29.032	0.898	3	3	3	3	3	3	367	0	0	0	0	0	0	0
THD2pp_b1602	337	0.733641	1.09169	1	64	125	155	119	0.587473	0.399568	0.591793	1389	463	56	2	19	18	22	46	12	38	17	49	20	20	16	8	11	28	22	46	4	8	43.049	0.688	0	0	0	0	0	0	462	0	0	0	0	0	0	312
PSCLYStex_b0929	44	1.53858	2.15677	0	56	129	52	126	0.556474	0.385675	0.490358	1089	363	34	0	27	14	19	49	1	14	19	23	5	32	5	13	12	16	22	26	2	29	37.082	0.832	3	3	3	3	3	3	362	0	0	0	0	0	0	0
IMPC_b4006	597	0.412463	1.42813	7	70	120	134	206	0.632075	0.415094	0.641509	1590	530	70	7	34	36	21	42	11	35	28	33	16	19	17	20	30	29	23	43	2	13	38.385	0.739	0	0	0	0	0	0	529	173	10	0.328154	0.000206	0.00185703	0.00185703	91
ADSS_b4177	614	0.270436	1.14783	0	59	135	109	130	0.648961	0.415704	0.551963	1299	433	32	4	31	29	12	46	6	20	22	44	10	13	17	10	28	16	33	39	4	16	35.806	0.799	0	0	0	0	0	0	432	160	10	0.326493	0.00208386	0.00171829	0.00171829	91
CHLtex_b1377	49	0.0274733	0.683685	1	68	140	60	110	0.550265	0.399471	0.449735	1134	378	42	0	37	12	19	43	5	9	17	27	9	33	5	14	11	21	24	17	5	27	40.354	0.74	3	3	3	3	3	3	377	0	0	0	0	0	0	0
NADH17pp_b2287	471	0.0238767	0.890042	0	32	63	65	61	0.59276	0.38914	0.570136	663	221	13	5	13	14	6	15	1	11	9	14	12	11	14	11	16	10	9	22	4	10	47.186	0.704	2	2	2	2	2	0	220	0	0	0	0	0	0	224
GLYCAtex_b0929	44	1.53858	2.15677	0	56	129	52	126	0.556474	0.385675	0.490358	1089	363	34	0	27	14	19	49	1	14	19	23	5	32	5	13	12	16	22	26	2	29	37.082	0.832	3	3	3	3	3	3	362	3	11	0.314667	0	4.27e-05	4.27e-05	261
G1Ptex_b0241	57	0.045701	0.726706	0	70	118	72	92	0.502841	0.372159	0.465909	1056	352	31	0	31	14	21	37	1	14	25	23	9	27	3	17	12	21	24	16	3	22	46.295	0.669	3	3	3	3	3	3	351	0	0	0	0	0	0	0
XANtex_b2215	64	0.0280042	1.90111	9	51	107	58	152	0.570652	0.377717	0.570652	1104	368	29	0	32	11	19	48	1	10	17	27	4	32	4	21	13	17	24	25	4	29	29.032	0.898	3	3	3	3	3	3	367	3	11	0.31491	0.000829	4.27e-05	4.27e-05	261
SUCCtex_b0929	44	1.53858	2.15677	0	56	129	52	126	0.556474	0.385675	0.490358	1089	363	34	0	27	14	19	49	1	14	19	23	5	32	5	13	12	16	22	26	2	29	37.082	0.832	3	3	3	3	3	3	362	2	11	0.314587	0	3.2e-05	3.2e-05	261
DMSOR1pp_b1872	62	0.0921516	0.861115	2	165	212	247	186	0.576543	0.428395	0.534568	2430	810	90	5	37	46	22	72	26	44	51	59	24	35	39	42	29	39	52	48	21	28	43.989	0.661	2	2	2	2	2	2	809	0	0	0	0	0	0	0
ASP1DC_b0131	401	0.118336	0.57497	0	19	37	23	48	0.582677	0.433071	0.559055	381	127	18	2	8	8	4	8	4	12	5	5	4	6	3	3	8	6	7	10	2	3	49.806	0.682	0	0	0	0	0	0	126	336	9	0.424022	0.000798	0.00359666	0.00359666	91
3PEPTabcpp_b1244	146	0.551909	1.06952	0	60	103	74	70	0.501629	0.400651	0.469055	921	307	31	1	8	6	18	24	5	31	12	41	14	9	18	4	13	18	14	24	3	12	46.979	0.539	2	2	2	2	2	2	306	0	0	0	0	0	0	8
GLYBt2pp_b4111	86	0.0516556	0.801316	0	64	149	166	122	0.550898	0.387226	0.57485	1503	501	47	4	22	18	29	43	9	48	20	60	19	11	23	14	19	26	25	39	7	17	43.98	0.634	0	0	0	0	0	0	500	0	0	0	0	0	0	0
NNAM_b1768	207	0.0478355	0.679475	0	37	59	59	59	0.630841	0.411215	0.551402	642	214	22	5	19	10	8	17	9	7	5	21	4	8	11	14	7	11	10	15	5	5	49.269	0.599	1	0	0	0	0	0	213	6	11	0.246827	7.92e-07	7.47e-05	7.47e-05	241
OXDHCOAT_b1394	166	0.0853922	0.812565	0	65	63	76	59	0.669202	0.452471	0.513308	789	263	32	5	16	13	9	24	4	9	9	34	8	10	11	13	19	10	15	15	3	3	49.397	0.544	1	1	1	1	1	1	262	0	0	0	0	0	0	0
UDPGtex_b0241	57	0.045701	0.726706	0	70	118	72	92	0.502841	0.372159	0.465909	1056	352	31	0	31	14	21	37	1	14	25	23	9	27	3	17	12	21	24	16	3	22	46.295	0.669	3	3	3	3	3	3	351	0	0	0	0	0	0	0
ALAALAabcpp_b3543	261	0.41012	0.943299	1	34	70	125	111	0.605882	0.394118	0.694118	1020	340	25	1	14	10	13	31	9	32	6	45	20	6	17	8	20	12	19	36	9	6	44.936	0.623	3	3	3	3	3	3	339	1	10	0.306327	0	2.13e-05	2.13e-05	306
GALCTNt2pp_b3691	25	0.239653	1.09385	5	49	121	144	117	0.540603	0.443155	0.605568	1293	431	42	5	11	10	33	47	4	34	15	49	13	9	18	10	17	21	27	36	14	15	42.676	0.675	2	2	2	2	2	2	430	0	0	0	0	0	0	0
GAM6Pt6_2pp_b3666	45	0.0629608	0.703357	0	55	104	142	163	0.523707	0.405172	0.657328	1392	464	44	6	13	17	35	52	3	39	23	56	16	12	10	14	14	29	24	28	9	19	41.785	0.7	0	0	0	0	0	0	463	0	0	0	0	0	0	0
BMOGDS1_b3857	129	0.0333441	0.590415	0	48	60	52	35	0.666667	0.389744	0.446154	585	195	19	2	12	12	5	15	8	6	7	22	7	8	11	9	12	5	7	19	4	4	50.205	0.536	0	0	0	0	0	0	194	336	9	0.424022	0.000798	0.00359666	0.00359666	91
TUNGStex_b1377	49	0.0274733	0.683685	1	68	140	60	110	0.550265	0.399471	0.449735	1134	378	42	0	37	12	19	43	5	9	17	27	9	33	5	14	11	21	24	17	5	27	40.354	0.74	3	3	3	3	3	3	377	0	0	0	0	0	0	0
CINNDO_b2542	53	0.171901	0.714061	3	76	108	116	101	0.648379	0.431421	0.541147	1203	401	44	6	20	25	9	32	9	27	11	49	6	20	19	25	26	16	20	22	10	4	48.759	0.563	0	0	0	0	0	0	400	0	0	0	0	0	0	0
FRUURt2rpp_b4321	42	0.0274591	0.629531	0	55	104	169	120	0.5625	0.383929	0.645089	1344	448	53	1	13	7	20	39	8	50	14	60	24	16	20	8	5	24	23	48	7	7	43.833	0.679	2	2	2	2	2	2	447	0	0	0	0	0	0	0
MANtex_b1377	49	0.0274733	0.683685	1	68	140	60	110	0.550265	0.399471	0.449735	1134	378	42	0	37	12	19	43	5	9	17	27	9	33	5	14	11	21	24	17	5	27	40.354	0.74	3	3	3	3	3	3	377	0	0	0	0	0	0	0
PGCD_b2913	320	0.686404	1.70854	8	71	101	132	107	0.622871	0.384428	0.581509	1233	411	45	4	19	27	13	34	13	28	23	49	9	21	17	13	15	24	18	28	1	9	42.061	0.687	0	0	0	0	0	0	410	4	10	0.311705	1.05e-06	5.34e-05	5.34e-05	302
SBTptspp_b2416	315	0.342568	1.34241	0	114	167	148	147	0.619792	0.357639	0.512153	1728	576	63	4	39	60	18	36	8	51	35	58	18	17	15	21	31	26	29	35	2	9	43.52	0.718	0	0	0	0	0	0	575	0	0	0	0	0	0	0
ACGAptspp_b2416	315	0.342568	1.34241	0	114	167	148	147	0.619792	0.357639	0.512153	1728	576	63	4	39	60	18	36	8	51	35	58	18	17	15	21	31	26	29	35	2	9	43.52	0.718	0	0	0	0	0	0	575	0	0	0	0	0	0	0
MALTTRabcpp_b4035	138	0.557362	0.951593	0	68	82	118	104	0.682796	0.365591	0.596774	1116	372	28	3	17	26	11	28	10	21	15	40	11	13	20	22	24	17	14	43	2	6	47.748	0.646	12	12	12	12	12	12	371	0	0	0	0	0	0	0
H2Otex_b1319	45	0.23485	0.84292	2	44	88	83	87	0.55298	0.380795	0.562914	906	302	20	3	27	23	18	28	7	7	8	22	8	21	9	9	16	12	16	15	10	22	50.238	0.644	0	0	0	0	0	0	301	1	1	1	0	2.13e-05	2.13e-05	170
ADCS_b3360	556	0.074502	0.618619	0	33	49	53	53	0.632979	0.404255	0.56383	564	188	15	4	11	9	7	15	9	12	6	21	4	6	10	8	10	9	9	14	3	5	49.877	0.559	1	1	1	1	1	1	187	336	9	0.424022	0.000798	0.00359666	0.00359666	91
NAt3pp_b0842	33	0.239994	1.02413	0	61	102	154	94	0.554745	0.413625	0.603406	1233	411	47	4	6	14	21	42	4	35	10	67	18	13	13	16	15	23	16	26	10	10	44.994	0.566	0	0	0	0	0	0	410	0	0	0	0	0	0	232
MCTP1App_b0149	112	0.131459	0.680924	0	119	210	312	204	0.628402	0.415385	0.610651	2535	845	68	2	52	38	25	66	5	38	40	83	27	35	52	63	60	50	40	57	13	30	39.543	0.669	1	1	0	0	0	0	844	173	10	0.332971	0.000137	0.00185703	0.00185703	306
PPTtex_b1377	49	0.0274733	0.683685	1	68	140	60	110	0.550265	0.399471	0.449735	1134	378	42	0	37	12	19	43	5	9	17	27	9	33	5	14	11	21	24	17	5	27	40.354	0.74	3	3	3	3	3	3	377	0	0	0	0	0	0	0
3PEPTabcpp_b1329	52	0.259371	0.784603	0	116	153	163	106	0.539033	0.399628	0.5	1614	538	51	2	26	27	18	28	8	27	39	47	8	35	34	27	17	28	41	40	13	21	47.351	0.597	1	1	1	1	1	1	537	0	0	0	0	0	0	8
ARBTtex_b2215	64	0.0280042	1.90111	9	51	107	58	152	0.570652	0.377717	0.570652	1104	368	29	0	32	11	19	48	1	10	17	27	4	32	4	21	13	17	24	25	4	29	29.032	0.898	3	3	3	3	3	3	367	0	0	0	0	0	0	0
PAPA160pp_b1278	82	0.0324914	0.618938	0	72	65	75	43	0.588235	0.466667	0.462745	765	255	29	2	3	15	11	15	6	16	10	32	5	3	13	11	18	10	15	21	17	2	55.788	0.485	0	0	0	0	0	0	254	2	2	0.75	0	3.2e-05	3.2e-05	6
3AMPtex_b1377	49	0.0274733	0.683685	1	68	140	60	110	0.550265	0.399471	0.449735	1134	378	42	0	37	12	19	43	5	9	17	27	9	33	5	14	11	21	24	17	5	27	40.354	0.74	3	3	3	3	3	3	377	0	0	0	0	0	0	0
MLTGY1pp_b2963	98	0.021051	0.551913	0	44	98	98	120	0.516667	0.411111	0.605556	1080	360	28	1	24	10	11	25	7	26	20	28	9	21	13	13	23	28	27	22	3	20	46.462	0.633	1	1	1	1	1	1	359	0	0	0	0	0	0	212
NTD5_b4374	95	0.124313	0.588316	0	28	56	67	75	0.588496	0.389381	0.628319	678	226	20	3	14	16	13	16	5	13	8	25	4	12	8	11	10	11	13	12	6	5	47.933	0.651	0	0	0	0	0	0	225	0	0	0	0	0	0	248
GLCNt2rpp_b3415	106	0.0222861	0.738314	0	56	111	147	125	0.567198	0.414579	0.61959	1317	439	49	3	10	12	22	46	6	44	17	57	26	9	22	5	7	24	25	42	5	7	41.898	0.727	4	3	3	3	3	3	438	6	11	0.315234	0.000578	7.47e-05	7.47e-05	261
ACLS_b0077	544	0.836508	1.19247	3	93	151	195	136	0.613913	0.398261	0.575652	1725	575	47	6	30	29	12	49	19	29	23	53	23	17	28	33	24	31	34	59	9	19	50.011	0.572	1	1	1	1	1	1	574	162	10	0.374389	1.9e-05	0.00173963	0.00173963	91
ICDHyr_b1136	285	0.442673	1.83329	4	78	120	97	122	0.601918	0.378897	0.52518	1251	417	38	6	25	35	10	40	5	37	31	31	13	15	20	11	17	13	18	30	6	15	39.484	0.778	0	0	0	0	0	0	416	176	10	0.330189	0.000546	0.00188905	0.00188905	91
ISETACabcpp_b0365	75	0.126267	1.26614	0	61	54	110	96	0.623053	0.423676	0.641745	963	321	45	0	16	14	10	20	3	19	22	25	1	12	19	22	8	21	16	33	7	7	44.002	0.67	0	0	0	0	0	0	320	0	0	0	0	0	0	0
HYD1pp_b2723	29	0.191444	0.70141	0	67	133	232	177	0.623974	0.449918	0.671593	1827	609	80	13	8	13	24	64	11	42	17	103	23	17	26	14	17	35	21	53	17	10	41.375	0.671	1	1	1	1	1	1	608	1	13	0.194414	0	2.13e-05	2.13e-05	261
CYTDtex_b0929	44	1.53858	2.15677	0	56	129	52	126	0.556474	0.385675	0.490358	1089	363	34	0	27	14	19	49	1	14	19	23	5	32	5	13	12	16	22	26	2	29	37.082	0.832	3	3	3	3	3	3	362	3	11	0.31491	0.000829	4.27e-05	4.27e-05	261
TMAtex_b1377	49	0.0274733	0.683685	1	68	140	60	110	0.550265	0.399471	0.449735	1134	378	42	0	37	12	19	43	5	9	17	27	9	33	5	14	11	21	24	17	5	27	40.354	0.74	3	3	3	3	3	3	377	0	0	0	0	0	0	0
TMAOR2pp_b1872	62	0.0921516	0.861115	2	165	212	247	186	0.576543	0.428395	0.534568	2430	810	90	5	37	46	22	72	26	44	51	59	24	35	39	42	29	39	52	48	21	28	43.989	0.661	2	2	2	2	2	2	809	0	0	0	0	0	0	0
XYLabcpp_b3568	127	0.143378	0.952437	6	76	90	97	131	0.543147	0.494924	0.57868	1182	394	49	2	8	5	14	48	0	34	7	52	19	12	12	9	18	30	24	33	11	6	49.139	0.553	2	2	2	2	3	2	393	0	0	0	0	0	0	0
3UMPtex_b1377	49	0.0274733	0.683685	1	68	140	60	110	0.550265	0.399471	0.449735	1134	378	42	0	37	12	19	43	5	9	17	27	9	33	5	14	11	21	24	17	5	27	40.354	0.74	3	3	3	3	3	3	377	0	0	0	0	0	0	0
DMSOR2_b0894	43	0.258452	0.808415	0	128	218	226	243	0.573006	0.433129	0.57546	2445	815	65	15	47	51	18	72	17	55	44	55	25	39	46	29	49	44	49	46	13	35	44.292	0.693	2	2	2	2	2	2	814	0	0	0	0	0	0	0
GAMptspp_b2415	225	0.0245069	1.24341	4	18	22	22	24	0.593023	0.395349	0.534884	258	86	9	0	1	9	4	6	2	3	7	8	2	2	2	6	1	6	10	7	0	0	38.988	0.805	1	1	1	0	0	0	85	0	0	0	0	0	0	0
FMNRx_b0937	124	0.0656368	0.697136	0	34	53	53	52	0.682292	0.395833	0.546875	576	192	22	0	12	8	7	9	7	4	7	32	1	5	11	11	11	10	11	14	2	7	50.74	0.575	0	0	0	0	0	0	191	1	11	0.314506	0	2.13e-05	2.13e-05	261
ORPT_b3642	171	0.0574474	0.629468	0	32	52	70	60	0.61215	0.373832	0.607477	642	214	23	2	11	19	12	19	4	15	12	23	4	6	6	7	12	9	9	12	0	8	44.247	0.655	0	0	0	0	0	0	213	171	10	0.327803	0.000977	0.00183569	0.00183569	91
LYStex_b0241	57	0.045701	0.726706	0	70	118	72	92	0.502841	0.372159	0.465909	1056	352	31	0	31	14	21	37	1	14	25	23	9	27	3	17	12	21	24	16	3	22	46.295	0.669	3	3	3	3	3	3	351	16	11	0.317111	0.000741	0.000181	0.000181	261
GPDDA4_b3449	105	0.110683	0.785986	0	38	49	90	71	0.612903	0.431452	0.649194	744	248	25	4	15	16	5	21	6	12	13	32	8	10	13	7	15	10	11	12	8	4	45.732	0.606	0	0	0	0	0	0	247	8	9	0.190899	0.00774779	9.61e-05	9.61e-05	198
ACSERtex_b0929	44	1.53858	2.15677	0	56	129	52	126	0.556474	0.385675	0.490358	1089	363	34	0	27	14	19	49	1	14	19	23	5	32	5	13	12	16	22	26	2	29	37.082	0.832	3	3	3	3	3	3	362	5	11	0.315559	3.1e-06	6.4e-05	6.4e-05	261
2AGPGAT141_b2836	53	0.183582	0.630585	1	136	179	211	194	0.611111	0.405556	0.5625	2160	720	55	4	30	45	36	55	16	39	38	78	23	13	41	27	51	33	44	61	8	22	47.712	0.603	0	0	0	0	0	0	719	4	12	0.138449	0.00167396	5.34e-05	5.34e-05	198
PUNP7_b2407	245	0.149857	0.85186	2	45	81	86	66	0.597122	0.406475	0.546763	834	278	27	6	11	16	16	27	8	17	12	27	10	10	13	8	11	15	13	24	0	6	47.137	0.604	0	0	0	0	0	0	277	0	0	0	0	0	0	292
TRPtex_b2215	64	0.0280042	1.90111	9	51	107	58	152	0.570652	0.377717	0.570652	1104	368	29	0	32	11	19	48	1	10	17	27	4	32	4	21	13	17	24	25	4	29	29.032	0.898	3	3	3	3	3	3	367	3	11	0.314667	0	4.27e-05	4.27e-05	261
NODOx_b2552	145	0.351652	1.04752	0	78	95	109	115	0.619647	0.390428	0.564232	1191	397	43	2	20	29	21	32	13	16	21	34	10	18	21	20	15	15	21	27	6	12	42.697	0.704	0	0	0	0	0	0	396	0	0	0	0	0	0	0
R5Ptex_b0929	44	1.53858	2.15677	0	56	129	52	126	0.556474	0.385675	0.490358	1089	363	34	0	27	14	19	49	1	14	19	23	5	32	5	13	12	16	22	26	2	29	37.082	0.832	3	3	3	3	3	3	362	0	0	0	0	0	0	0
TSULabcpp_b2424	204	0.277946	1.35995	3	33	61	119	65	0.586331	0.438849	0.661871	834	278	33	2	4	12	21	17	1	14	5	43	7	5	12	8	12	21	18	28	7	7	38.702	0.629	2	2	1	1	1	1	277	0	0	0	0	0	0	0
[truncated: 1,505 more rows]
[truncated: 16 more columns]
